# Supplementary material for: An explainable predictive machine learning model of oxaliplatin induced peripheral neuropathy based on clinical data: a retrospective single center
Source: Research Square preprint supplement (doi:10.21203/rs.3.rs-7911184/v1), 2025-12-01
Supplement: Supplementary file 1 [file 03d8f9775810753d5cd43088.xlsx]

## Sheet: Sheet1
No	Sex	Age	NOCC	PMH	CCS	Total_OXA	OXA	ETCO	group	NRS2002	ECOG	BI	WBC	LYM	MON	NEU	EOS	BAS	LYM1	MON1	NEU1	EOS1	BAS1	RBC	HGB	HCT	MCV	MCH	MCHC	RDW_SD	RDW_CV	PLT	PCT	MPV	PDW	T	N	M	Grade	BMI	PT	INR	PT1	APTT	FIB	TT	D_Dimer	FDP	ATIII
146	1	79	8	1	3	1200	150	0	1	2	0	100	6.4	0.5	3.7	1.9	0.2	0	8.2	58.4	30.6	2.5	0.3	4.27	133	39.9	93.4	31	333	47.2	13.8	164	0.18	11.1	16.9	2	2	0	2	24.9135	11.1	0.93	113	28	2.48	16.6	0.35	2.8	73.1
307	1	55	6	0	3	840	140	0	1	1	0	100	4.6	1.7	0.4	2.5	0.1	0	35.7	8.1	54.7	1.4	0.1	4.78	152	45.7	95.7	31.8	333	45.4	12.9	218	0.21	9.7	16.2	1	2	0	1	22.7732	10.4	0.86	131.5	30.44	3.19	15.7	0.48	1.4	96.2
235	2	72	4	1	3	600	150	0	1	2	0	100	11.8	0.9	0.6	10.3	0	0	7.7	4.9	87.3	0	0.1	3.11	91	29.4	94.6	29.3	310	72.5	21.5	206	0.22	10.5	16	2	1	0	2	28.4444	11.1	0.93	113	24.2	2.48	16.2	1.63	6.5	89.6
221	1	76	4	1	4	800	200	0	1	2	0	90	6.2	2.2	0.4	3.1	0.4	0.1	35.7	7	50.8	5.7	0.8	4.63	149	43	92.9	32.1	347	44.7	13.3	181	0.17	9.4	16	1	2	3	3	25.8166	10.8	0.91	119.5	27.1	3.7	15.8	0.78	3.5	76.6
820	1	70	1	1	3	180	180	0	0	2	0	100	3.9	1.5	0.3	2	0.1	0	38.6	8.3	50.8	1.6	0.7	4.61	147	44.5	96.6	32	331	49.8	14.2	115	0.12	10.9	16.4	2	1	0	2	24.6548	11.5	1	100	28.5	3.85	15.4	0.29	2	87.1
333	2	56	2	1	4	260	130	0	1	2	1	100	3.2	1.1	0.4	1.7	0.1	0	33.5	12.3	51.8	2	0.4	4.12	128	38.5	93.5	31.1	332	45.5	13.4	209	0.24	11.3	16.4	2	2	0	2	27.0552	10.3	0.85	134.1	23.6	3.26	16.5	0.33	2.3	88
133	2	59	4	0	2	480	120	0	1	1	0	100	3.9	0.5	1.6	1.7	0.1	0	12.6	40.8	44.3	2.1	0.2	3.62	106	33	91.2	29.3	321	49.1	14.6	137	0.18	12.2	16.6	1	0	0	3	26.9127	9.9	0.82	145.4	23.9	3.39	16.4	0.84	3.3	96.5
397	2	61	9	1	4	1350	150	1	1	1	1	100	2.9	1.2	0.2	1.4	0.1	0	41.1	7.6	48.3	2.5	0.5	4.01	117	36.3	90.4	29.3	322	45.3	13.9	106	0.1	9	15.8	2	1	1	2	23.0469	11.6	0.97	105.2	23.4	2.2	16.9	0.73	3.6	95
328	1	56	5	1	4	1200	240	0	1	1	1	95	6.5	1.4	0.8	4.1	0.1	0	21.9	12.6	64	1.2	0.3	3.23	98	30	92.8	30.4	327	70.7	20.9	83	0.09	11.3	16.5	3	2	1	3	21.7993	10.882	0.9137	117.609	25.33	3.8884	16.169	0.72145	3.28	91.4417
446	1	60	2	0	4	280	140	1	1	1	0	100	9.5	1.9	0.4	7.1	0.1	0	20.4	3.9	74.6	0.7	0.4	4.64	143	42.3	91.2	30.8	338	46.5	14.1	163	0.2	12.2	16.3	2	1	2	3	22.4913	11	0.92	115.1	24.2	3.56	14.8	0.84	3.4	94.7
42	1	60	3	1	2	600	200	1	1	1	0	100	5.9	3.3	1.8	0.6	0.2	0	55.9	30.5	10	3	0.6	3.66	131	39	106.6	35.8	335	61.2	15.7	154	0.16	11.6	16.2	2	0	0	3	22.231	10.7	0.93	108	25.9	2.39	18	1.27	4.7	90.2
515	2	62	1	0	3	180	180	0	1	1	0	100	4.3	1.5	0.5	2.1	0.2	0	35.7	10.4	49.4	3.7	0.8	3.78	105	32.7	86.5	27.7	321	54.2	17.4	179	0.18	9.9	15.5	1	1	0	3	29.1363	10.6	0.89	124.1	24.3	3.12	15.8	0.23	1.9	96.6
109	2	68	4	0	2	480	120	1	1	1	1	100	4.8	1.3	0.5	2.9	0.1	0	27	10.3	60.8	1.3	0.6	5.34	130	40.1	75.1	24.3	324	61.5	22.9	318	0.27	8.4	15.1	2	1	0	3	16.7969	10	0.83	138.5	24.8	2.74	15.9	0.44	2.1	109
361	1	74	4	0	3	720	180	0	1	2	1	100	5	2.2	0.4	2.2	0.2	0	44.2	7.6	44.2	3.7	0.3	4.45	141	41.3	92.9	31.6	341	46.7	13.7	180	0.18	9.9	16.3	2	1	0	3	23.5102	10.5	0.88	126.5	25.6	3.06	16.5	0.42	2.7	97
57	1	56	3	0	4	450	150	0	1	1	0	100	7.5	5.2	1	1	0.3	0.1	68.9	13.2	13.5	3.7	0.7	3.75	114	35.2	93.7	30.5	325	51.8	15.1	204	0.24	11.4	16	1	1	1	2	25.6055	14.1	1.23	69.1	33.1	6.83	14.3	1.51	5.6	71.1
434	1	58	2	0	3	380	190	1	1	1	0	100	3.1	1.5	0.4	1.3	0	0	46.8	11.1	40.8	0.8	0.5	3.75	109	33.1	88.2	29.1	329	69.4	22.3	155	0.15	9.5	16	1	1	0	3	19.0311	11.4	0.96	105.4	24.7	2.13	17.1	1.11	4.6	89.4
295	2	58	2	0	4	400	200	0	1	1	0	100	5.5	1.7	0.6	3.1	0.1	0	31.9	10.1	56.5	0.9	0.6	3.86	120	36.7	95.1	31.1	327	46.1	13.4	91	0.09	9.5	16.4	1	1	1	4	18.3594	11.1	0.93	115.1	25.6	3.62	15.4	0.4	2.1	88.1
430	2	52	6	0	2	900	150	0	1	3	0	100	12.1	0.8	0.7	10.5	0.1	0	6.6	5.5	87.1	0.8	0	2.5	72	21.9	87.4	28.8	329	55.6	17.1	98	0.11	11.7	16.8	2	0	0	2	20.9321	10.4	0.9	111.4	23.7	2.96	16.3	0.2	2.2	93.4
25	1	53	3	0	3	600	200	1	1	1	0	100	6.7	4.3	1.6	0.6	0.1	0	24.2	9.3	64.5	1.6	0.4	4.34	98	31.3	72.1	22.5	312	67.7	26.1	222	0.17	8.2	15.1	2	1	0	3	22.2753	10.9	0.95	105.9	24.4	1.87	18.3	0.36	1.7	101.4
479	2	61	12	1	4	1800	150	1	1	1	1	100	1.9	0.9	0.2	0.7	0.1	0	49	10	36.5	3.1	1.4	3.3	108	32.4	98.3	32.6	333	66.8	18.9	99	0.1	9.7	16.6	2	1	1	2	22.6562	11.4	0.96	107.1	24.3	2.83	16.8	0.51	2.5	101.1
368	1	64	11	0	3	1650	150	0	1	1	0	100	4.3	1.3	0.5	2.3	0.2	0	29.6	11.5	53.7	4.7	0.5	4.25	136	40.2	94.6	32.1	338	49.7	14.3	106	0.12	11.1	16.9	1	1	0	3	21.1463	11.1	0.94	111	28.3	2.46	17.2	0.45	2.6	88.1
383	2	68	3	1	3	360	120	0	1	1	0	100	5.3	1.3	0.6	3.3	0.1	0	25.4	11	62	1.2	0.4	5	141	42	84.1	28.2	335	76.8	25.9	157	0.14	8.9	15.6	1	2	0	1	27.7344	9.4	0.78	158.3	20.7	3.67	17.6	1.05	4.7	145.8
52	1	56	2	0	2	300	150	1	1	1	1	100	4.2	2.5	1.1	0.5	0.1	0	57.9	26.8	12.6	2.1	0.6	3.35	97	29.6	88.5	28.9	326	52.6	15.9	227	0.2	8.9	16	1	1	0	3	22.5981	11.4	0.99	100.9	26.5	3.57	16	0.8	2.1	82.5
661	1	53	2	1	4	300	150	0	0	1	0	100	3.8	1.3	0.5	1.9	0.1	0	33.8	13.8	50.2	1.9	0.3	3.41	113	34.7	101.7	33	326	83.9	21.5	165	0.16	9.4	16.1	1	2	1	3	24.6244	10.6	0.88	126.5	24.5	2.56	17	0.77	3.4	85
762	1	64	1	0	3	150	150	0	0	1	0	100	6.5	2.2	0.6	3.6	0.2	0	33.8	8.8	54.9	2.4	0.1	4.2	132	38.8	92.5	31.4	339	54.7	16.3	208	0.2	9.6	15.8	2	1	0	4	19.6283	10.6	0.88	123.6	23.9	2.22	16.2	1.08	4.1	89
265	1	54	4	1	4	880	220	0	1	1	0	100	5.3	1.1	0.2	3.4	0.5	0	21.1	4.3	64	10.1	0.5	3.5	123	37.2	106.2	35.2	331	56.9	14.6	131	0.15	11.3	16.7	2	2	1	3	19.5918	10.6	0.88	126.5	28.8	2.55	16	0.55	3.2	94.7
546	1	57	3	1	4	390	130	1	1	1	0	100	4.5	1.6	0.4	2.3	0.1	0	35.9	9.9	51.3	2.6	0.3	4.01	117	36	89.8	29.3	325	46.3	14.2	222	0.19	8.7	16	3	3	1	2	22.6562	10.2	0.85	134.1	23.1	4.58	14.7	0.25	1.8	105.5
577	1	53	2	0	3	440	220	0	1	1	0	100	3.8	0.8	0.5	2.3	0.2	0	21.2	13.4	60.6	4.2	0.6	4.08	142	41.7	102.1	34.9	341	56.5	15.4	129	0.13	9.8	16.2	1	2	0	2	25.9095	10.1	0.84	135.9	22.7	2.64	15.6	1.13	3.9	95.2
351	1	73	6	0	4	1200	200	0	1	2	0	100	4.8	1.3	0.5	2.9	0.1	0	27	10.3	60.8	1.3	0.6	5.34	130	40.1	75.1	24.3	324	61.5	22.9	318	0.27	8.4	15.1	1	2	0	3	24.3865	10	0.83	138.5	24.8	2.74	15.9	0.44	2.1	109
300	1	73	4	0	3	800	200	0	1	2	1	100	3.9	1.5	0.3	2	0.1	0	38.1	8.6	50.5	2.2	0.6	3.38	106	32.8	96.9	31.3	323	74.8	21.2	177	0.15	8.6	15.4	1	1	0	1	20.0474	11	0.92	117.2	26.9	2.27	15.7	0.36	2.7	70.8
19	1	47	3	0	3	360	120	1	1	1	0	100	6.9	4.9	1.3	0.7	0.1	0	70.6	18.2	10.1	0.8	0.3	4.51	139	40.5	89.7	30.9	344	47.3	14.1	222	0.21	9.9	15.8	3	1	0	3	22.8624	9.8	0.84	118.7	24.5	3.17	15.5	0.28	2.3	107.5
604	1	75	1	1	4	180	180	0	0	2	0	90	9.3	7.5	1.4	0.3	0.1	0	80.5	15.3	3.2	0.8	0.2	2.55	60	19.5	76.5	23.4	306	74.7	28.6	162	0.14	8.9	15.2	1	1	0	2	22.5827	12.2	1.06	89.8	26.2	2.2	15.8	2.69	9.2	77.4
287	1	64	8	0	3	1200	150	0	1	1	0	100	3.9	1	0.5	2	0.4	0	25.5	12.5	51.3	10.4	0.3	4.11	127	38.3	93.1	30.9	332	48.9	14.4	117	0.12	10.4	17	1	1	0	3	20.9885	11.3	0.95	109	26.7	2.4	16.7	0.59	3.9	78.5
84	2	72	3	1	2	540	180	1	1	2	0	100	4	1.9	1.7	0.2	0.1	0	48.1	43.5	6.1	1.9	0.4	3.66	110	32.1	87.9	30	341	66.9	20.3	100	0.1	10	16.2	1	0	0	3	21.2279	10.4	0.9	111.4	25.5	2.35	18	0.86	3.5	89.4
62	2	31	1	0	4	200	200	0	1	1	0	100	3.6	2.1	1	0.3	0.3	0	56.8	27.3	7	8.2	0.7	3.86	130	38.2	99.1	33.7	341	48.4	13.4	200	0.2	10.4	16.2	1	1	0	1	24.8016	10.9	0.94	105.9	30.8	3.23	14.5	1.16	3.6	97.9
483	2	57	1	0	2	200	200	0	1	1	1	100	10.1	1.2	0.8	8.1	0	0	12	7.8	79.9	0.1	0.2	3.69	106	32.1	87.1	28.8	330	44.4	14.2	218	0.22	10.3	16.4	1	0	0	4	18.6851	10.8	0.9	119.2	23.3	1.95	16.3	0.91	3.5	90.8
286	1	64	9	0	3	1350	150	0	1	1	0	100	2.7	1.1	0.4	1	0.2	0	40.7	15	36.8	7	0.5	4.12	128	38.4	93.3	31.2	333	47.4	14	90	0.09	10.4	17.1	1	1	0	3	21.7776	11.5	0.96	107.1	27.3	2.26	17.8	0.69	3.4	84.6
508	1	57	3	0	3	690	230	0	1	1	0	100	4.6	1.4	0.3	2.8	0.1	0	30.5	7.5	59.7	2.2	0.1	4.16	123	38	91.4	29.5	324	61.8	18.5	124	0.13	10.7	16.3	1	1	0	3	24.4898	10.2	0.84	136.8	26.2	2.38	17	0.66	3.4	94.9
399	2	64	5	0	3	900	180	1	1	1	0	100	3.9	1.2	0.5	2.1	0.1	0	31.1	13.1	52.4	2.9	0.5	3.36	120	36	107.2	35.6	333	64.5	16.5	105	0.11	10.4	16.4	1	1	0	3	22.7732	10.7	0.89	121.7	25.7	2.22	18.6	0.64	2.8	69.1
468	1	37	2	0	2	400	200	0	1	1	1	100	5.5	2	4	2.9	1	0	36.6	78	53.4	21	1	4.37	135	40.9	93.7	30.7	330	57.4	16.7	183	0.18	9.7	15.5	1	0	0	2	22.7244	10.2	85	134.1	23.2	1.95	17.3	0.54	2.5	90.9
183	1	60	5	1	2	1000	200	0	1	1	0	95	4.9	1.4	0.3	3.1	0.1	0	27.9	6.7	63.4	1.9	0.1	4.33	104	34.6	79.8	24	301	66.8	23.2	207	0.21	9.8	15.8	1	0	0	3	22.7204	10.88	0.9136	117.722	24.618	3.1134	16.251	0.6141	2.908	106.559
329	1	56	4	1	4	960	240	0	1	1	1	95	6.2	1.1	0.6	4.5	0	0	17.3	9.4	72.8	0.3	0.2	2.99	86	26.6	88.9	28.6	323	61.5	19	120	0.13	10.4	16.6	3	2	1	3	21.7993	10.853	0.9138	117.694	26.843	4.222	15.96	0.72045	3.324	87.4334
520	1	54	12	1	4	1800	150	0	1	1	0	100	4.4	0.6	0.5	3.2	0.1	0	13.7	11.8	72.5	1.6	0.4	4.42	140	43.1	97.4	31.6	325	477.4	13.4	185	0.16	8.6	16	1	2	1	3	23.3844	10.879	0.9137	117.442	24.895	3.1051	16.125	0.6938	3.189	88.61
224	2	70	2	0	2	300	150	1	1	2	0	100	3.3	1.2	0.3	1.7	0.1	0.1	36.5	8.9	51	1.9	1.7	3.91	124	37.2	95.1	31.7	333	60	17.4	140	0.15	11	16.3	1	0	0	3	22.719	11.1	0.93	113	26	2.65	16.6	0.38	2.6	85.2
444	2	70	6	1	3	1080	180	0	1	2	1	100	3.4	1	0.2	2.1	0.1	0	30.3	6	61.5	1.6	0.6	4.4	128	38.7	88	29.1	331	64.7	20.2	109	0.11	10.1	15.9	0	2	0	3	27.0552	10.9	0.91	117.1	23.4	2.9	15.3	0.53	2.6	111.4
595	1	66	1	1	4	180	180	0	0	1	0	100	8.2	5.3	2.1	0.6	0.1	0.1	65	26.2	6.9	1.2	0.7	3.65	103	31.9	87.4	28.4	325	56.9	18	371	0.28	8.3	15.2	1	1	1	3	18.7328	12.3	1.07	88.5	27.3	4.12	16.8	2.38	7.5	95
335	1	62	2	1	4	400	200	0	1	1	1	100	4.4	1.9	0.3	1.9	0.3	0.1	43.7	5.7	43	6.2	1.4	3.24	104	31.8	98.1	32.02	327	57.1	15.9	258	0.24	9.4	16.1	3	3	1	3	20.7612	10.9	0.91	119.4	28.9	3.47	17.2	6.11	16.5	79.8
345	2	62	2	0	2	300	150	1	1	4	0	90	2.3	1.3	0.3	0.7	0.1	0	55	11.4	30.1	2.5	1	3.43	109	33.1	96.4	31.8	329	64	18.2	82	0.1	12.4	16.8	1	0	0	4	15.8222	11.1	0.93	113	24.5	2	17.7	0.31	2.3	101.6
602	2	70	3	1	4	540	180	0	0	2	0	100	9	6	2.3	0.5	0.2	0	66.9	25.6	2	2.1	0.4	4.38	146	42.8	97.7	33.4	341	60	16.8	248	0.23	9.1	15.8	2	1	1	3	30.5438	10.5	0.91	110.2	25.6	5.14	15	0.95	3.5	87.4
514	1	34	6	0	4	1170	195	0	1	4	1	100	6.1	1.6	0.6	3.7	0.3	0	25.7	9	60.8	4.1	0.4	4.75	139	41.5	87.4	29.2	335	100	31.6	159	0.14	8.5	16.1	3	3	1	3	16.7062	10.8	0.9	119.2	23.7	2.54	15.7	0.91	3.8	110.9
177	1	79	4	1	4	720	180	1	1	2	0	100	5.5	0.6	0.7	3.9	0.3	0	10.5	12.3	71.2	5.3	0.7	3.06	115	33.1	108.3	37.4	347	71.8	18.1	171	0.14	8.3	16	1	2	1	1	24.6755	10.9	0.91	117.2	28	4.07	15.8	1.19	5.4	81.6
809	1	63	2	1	3	360	180	0	0	1	0	100	3.1	1.1	0.4	1.6	0.1	0	34.4	11.7	51.5	1.9	0.5	3.66	105	32.6	89	28.7	322	54.2	16.8	117	0.14	12.1	16.2	1	1	0	3	23.4236	11.4	0.96	105.4	24.1	2.07	16.7	0.23	2.1	85.2
733	1	47	6	1	3	840	140	0	0	1	1	100	4.5	1	0.3	3	0.1	0	23.2	7.2	67.6	1.5	0.5	4.16	115	35.1	84.4	27.6	328	57.8	18.8	133	0.13	9.8	15.8	0	2	0	2	20.7612	10.2	0.84	136.8	24.8	2.75	16.5	0.42	2.7	106.8
164	2	74	5	1	3	750	150	0	1	2	0	100	3.5	0.5	1.9	1	0.1	0	13.9	54.3	29.7	1.6	0.5	3.23	113	34.8	107.7	35.1	325	54	13.7	96	0.11	11.5	16.5	1	2	0	2	23.4952	11.1	0.93	113	25.9	2.52	16.2	0.36	1.4	89.5
249	2	44	6	0	4	1080	180	0	1	1	0	100	4.6	1.6	0.2	2.6	0.1	0	35.5	5.1	57.5	1.5	0.4	4.32	136	41	94.8	31.5	332	52.5	15.2	216	0.25	11.3	16.2	1	2	3	1	25.3906	10.4	0.86	131.5	27.6	1.99	16.1	0.68	3.4	83.1
537	2	67	5	0	4	900	180	0	1	1	1	100	2.8	1	0.6	1.1	0.1	0	34.4	19.9	40.1	5	0.6	2.99	91	28.6	95.5	30.4	318	90.2	26.4	54	0.06	10.9	16.3	1	1	1	3	24.4352	11.9	1	98.6	24.2	1.83	23	0.63	2.6	86.2
735	1	47	4	1	3	560	140	0	0	1	1	100	3.8	1.1	0.3	2.3	0.1	0	28.8	7	62	1.8	0.4	4.36	114	35.2	80.7	26.2	324	57.7	19.7	141	0.14	9.9	16.1	0	2	0	2	20.7612	10	0.83	139.6	23.8	2.84	15.6	0.66	3.1	106.5
75	1	56	5	0	3	750	150	0	1	4	1	90	4.6	1.9	1.5	0.6	0.6	0	42	33.4	12.2	12	0.4	3.12	95	29.4	94.3	30.4	323	64	18.6	226	0.19	8.5	15.8	1	1	0	3	22.5981	10.8	0.94	107	26.5	3.55	15.3	0.9	2.2	80.5
732	1	77	2	0	3	400	200	0	0	2	0	100	3.4	1.4	0.4	1.4	0.2	0	42.2	11	41.7	4.3	0.8	3.44	100	31.2	90.7	29	321	56.1	17.5	165	0.15	9.1	16	1	2	0	3	24.3025	10.7	0.89	121.4	23.5	2.22	17	0.87	3.3	88.1
425	1	71	4	0	3	800	200	0	1	2	0	100	2.9	1.2	0.3	1.3	0.1	0	41.6	11.2	43.3	3.4	0.5	3.63	119	35.3	97.2	32.8	337	67.3	19.2	124	0.13	9.1	16.1	2	1	0	3	20.6193	11.4	0.99	100.9	24.4	3.36	15.6	1.13	4.3	91.5
105	2	58	3	0	3	600	200	1	1	1	1	100	3.1	1	0.4	1.7	0	0	32.8	11.3	55.1	0.5	0.3	3.79	123	35.7	94.3	32.3	345	78.3	23	135	0.11	8.4	15.9	2	1	3	3	21.4844	10.5	0.91	110.2	22.8	2.22	14.8	6.87	16.4	117.9
115	1	60	4	0	2	800	200	0	1	1	0	100	3.9	1	0.4	2.2	0.2	0	27	9.2	57.5	5.9	0.4	3.16	98	30.7	97.1	30.9	319	79.3	22.5	82	0.07	8	15.8	1	0	2	3	18.5132	12	1.11	82.7	24.6	2.46	16.1	0.66	2.5	88.8
315	1	72	6	1	4	1200	200	0	1	2	1	100	2.8	0.9	0.7	1	0	0	34	27.2	37	1.1	0.7	3.29	102	32.2	98	31.1	317	61.4	17.2	145	0.14	9.7	16.3	3	3	1	1	21.7738	10.881	0.9143	117.439	24.655	2.8451	16.298	0.73875	3.191	100.907
93	1	71	2	0	3	400	200	0	1	2	0	100	4	2.4	1.2	0.3	0.2	0	58.9	29.1	6.6	4.3	1.1	3.72	117	33.7	90.5	31.5	347	55.8	16.9	132	0.13	9.3	15.7	2	1	0	3	21.2953	10.3	0.89	112.5	26.8	3.05	15.7	1	4.5	82.9
491	1	73	1	0	3	180	180	1	1	2	0	100	4.8	1.1	0.3	3.2	0.1	0	23.2	6.7	68.1	1.4	0.6	4.67	138	40.6	87	29.5	340	47.6	15.3	128	0.14	10.8	16.2	2	0	0	3	18.6453	10.6	0.89	124.1	24.3	1.88	16.3	1.04	4.3	95.2
90	1	54	4	0	2	800	200	0	1	1	0	100	4.1	1.2	2.3	0.5	0.1	0	29.4	56.2	11.1	3.1	0.2	2.94	104	30.9	105	35.3	336	84.4	21.6	67	0.07	10.8	16.8	2	0	0	2	21.4619	10.8	0.94	107	25.3	2.26	17.1	3.03	9.7	86.1
451	1	72	5	1	3	1000	200	0	1	2	0	100	3.2	0.5	0.5	2	0.2	0.1	16.3	14.6	60.8	6.7	1.6	3.57	119	36.3	101.7	33.4	328	57.6	15.4	93	0.09	9.4	16.3	0	1	0	4	17.9931	10.8	0.9	119.2	29	1.92	16.3	7.18	22.3	83
763	1	68	1	0	4	150	150	0	0	2	0	90	3.9	1.4	0.3	2.1	0.1	0	36.5	6.6	54.6	1.7	0.6	4.07	129	39.2	96.3	31.7	329	44.2	12.9	90	0.09	9.8	16.3	1	2	1	3	23.3011	11.5	0.97	103.7	22.5	2.65	16	0.39	1.8	91.2
772	1	57	4	0	4	800	200	0	0	1	1	100	4.1	1.8	0.4	1.5	0.3	0	45.2	10	37.5	6.4	0.9	4.37	143	42.9	98.2	32.8	333	61.6	17.3	80	0.07	8.8	16	2	0	0	3	24.3025	10.8	0.9	119.2	24.1	2.19	16.9	0.43	2.1	86.5
598	2	62	1	0	4	180	180	0	0	1	0	100	5.9	3.6	1.9	0.3	0	0	62	32.8	4.4	0.5	0.3	4.27	111	33.7	79.1	26	329	58.8	20.5	171	0.22	10.7	15.8	1	1	1	3	22.0604	10.3	0.89	112.5	24	3.12	15.1	1.32	4.5	89.2
533	1	51	4	0	4	720	180	0	1	1	1	100	3.5	1.2	0.3	1.9	0.1	0	33.5	88.3	54.5	3	0.77	4.3	145	42	97.6	33.7	345	46.1	13	118	0.12	9.9	16.5	3	3	1	2	26.7299	11.1	0.93	113	23.1	2.25	15.9	0.15	1.5	82.6
95	1	68	5	0	4	1000	200	1	1	1	0	100	4.7	2.8	1.4	0.4	0.1	0	59.7	30.5	7.5	1.4	0.9	4.39	118	36	82.1	27	328	46	15.4	91	0.12	12.7	16.4	1	1	1	3	20.8307	12.3	1.07	88.5	27.4	3.81	15.4	0.54	2.8	79.3
12	1	59	2	1	4	400	200	1	1	1	0	100	4.3	2.2	1.7	0.3	0.1	0	51.1	39.7	7.3	1.7	0.2	4.14	134	39.8	96	32.4	337	59	16.9	119	0.13	11.4	16.3	3	3	1	3	24.0238	10.5	0.91	110.2	28.9	2.11	18	0.77	2.8	89.6
806	1	61	1	1	3	140	140	0	0	2	1	100	10.4	0.9	0.7	8.8	0	0	8.4	6.4	85	0.1	0.1	3.49	77	24.8	71	22.1	310	48.2	19	229	0.17	7.6	15.3	1	1	0	3	23.8751	13.7	1.17	75.1	25.9	4.57	13.6	4.63	15.9	66.9
44	1	55	1	0	3	165	165	1	1	1	1	90	4.1	1.8	1.8	0.4	0.1	0	44.4	42.4	10.4	2.3	0.5	4.16	117	35.4	85.2	28.2	331	74.6	23.6	125	0.12	9.4	15.8	2	1	0	3	21.6263	0.94	107	26.1	2.77	18.3	0.59	1.9	80.6	80.6
43	1	44	1	0	2	200	200	1	1	1	0	100	5.1	3.3	1.4	0.4	0.1	0	63.8	27	7.7	1.3	0.2	5.47	138	42.5	77.8	25.2	324	64.7	23.2	202	0.18	9.1	15.5	1	0	0	3	19.3792	10.1	0.88	114.9	25.1	2.03	17.2	0.64	2.2	106.7
168	1	69	5	1	4	1000	200	1	1	1	1	100	6.1	2	0.4	3.3	0.4	0.1	33.4	6.5	53.5	5.7	0.9	4.13	124	36.7	88.9	30.1	338	52	16.3	190	0.17	9	15.6	2	0	1	3	25.1429	11.1	0.93	113	23.7	3.76	16.6	5.25	15.4	114.2
728	1	43	3	1	4	450	150	0	0	1	0	100	5.1	0.4	0.3	4.3	0.1	0	8.4	6	84	1.4	0.2	4.13	132	40.3	97.5	32.1	328	56	15.8	203	0.21	10.3	16.6	1	0	1	3	21.1463	12.1	1.02	94.9	28.6	3.85	14.8	0.47	2.6	96.6
517	1	56	9	1	4	1350	150	0	1	1	0	100	6.6	1.1	0.3	5.1	0.2	0	16.5	4.1	76.4	2.4	0.6	4.84	149	45.2	93.3	30.7	330	48.1	14.3	182	0.19	103	16	2	1	1	3	24.6914	10.881	0.9134	117.592	25.383	3.1681	16.107	0.7333	3.327	98.204
636	1	57	1	0	3	100	100	0	0	1	1	100	8.8	1	5.5	2.1	0.3	0	11	62	23.6	3.2	0.2	3.96	115	34.7	87.7	29.1	331	47.2	14.7	412	0.32	8.1	15.2	2	1	0	3	22.9719	11.7	0.98	103.4	26.7	4.51	15.7	0.8	3.8	77.6
432	1	56	3	0	4	450	150	1	1	1	0	100	9.4	1.6	0.7	6.9	0.2	0	17.1	7.7	73.4	1.6	0.2	3.95	133	38.7	98	33.7	344	59.3	16.6	89	0.12	13.6	16.9	1	1	0	3	19.8616	11	0.92	115	22.7	3.09	15.8	0.78	3.1	98.3
179	2	59	12	1	4	1200	100	0	1	1	1	100	6	1.9	0.3	3.5	0.2	0.1	31.9	4.9	58.6	3.7	0.9	4.05	127	38.8	95.7	31.4	327	50.8	14.7	182	0.19	10.6	16.3	2	1	0	3	22.2222	9.9	0.82	142.5	24.5	2.84	17.1	0.17	1.4	88.9
549	1	39	7	0	4	1050	150	0	1	1	0	100	10.5	1.2	0.9	8.3	0.1	0.1	11.1	8.6	78.7	1.1	0.5	3.71	114	35.7	96.1	30.8	319	67.7	19.3	242	0.25	10.5	16.2	1	2	0	2	18.2149	10.4	0.86	128.3	24.7	4.44	14.6	0.19	1.7	97.6
558	1	72	8	1	4	1600	200	0	1	2	1	100	5.8	0.5	0.4	4.8	0	0	8.9	7.5	82.8	0.5	3	3.05	99	30.5	100	32.4	325	58.7	16.1	41	0.04	10.5	17	3	3	1	1	20.3223	9.5	0.78	154.9	21.4	1.99	17.1	0.221	1.6	122.7
178	2	58	1	0	4	200	200	0	1	1	0	100	5.5	1.7	0.6	3.1	0.1	0	31.9	10.1	56.5	0.9	0.6	3.86	120	36.7	95.1	31.1	327	46.1	13.4	91	0.09	9.5	16.4	1	1	1	4	18.3594	11.1	0.93	115.1	25.6	3.62	15.4	0.4	2.1	88.1
585	1	68	7	0	4	1540	220	0	1	1	1	100	9.3	2.2	0.7	6.2	0.2	0.1	23	7.9	66.9	1.6	0.6	4.87	138	42	86.3	28.4	329	49.1	15.6	235	0.21	9.1	15.8	1	1	1	2	24.977	10.7	0.89	121.7	27.5	3.72	17.2	0.44	2.2	99.5
579	1	65	9	1	4	1350	150	1	1	1	0	100	7.4	1.6	1	4.7	0.1	0	21.6	13.9	62.6	1.3	0.6	4.12	117	36.2	87.8	28.3	323	58.8	18.6	141	0.12	8.3	15.9	2	2	3	3	23.1978	11.8	1	98.6	25.5	3.41	17.7	0.65	2.6	90
258	2	70	3	1	2	540	180	1	1	2	1	100	3	0.5	0.3	1.8	0.4	0	18.4	9.4	60	11.8	0.4	3.7	112	34.6	93.4	30.2	324	53.1	15.6	146	0.12	8.3	16	0	1	0	2	27.3438	10.7	0.9	121.7	27.7	2.54	16.5	1.72	7	82
376	1	58	6	1	4	1254	209	0	1	1	1	100	3	0.6	0.4	2	0	0	21.3	12.4	65.3	0.6	0.4	3.76	125	37.3	99.1	33.2	335	49.4	13.5	74	0.08	10.1	16.6	1	0	1	3	19.2672	10.4	0.87	126	29.6	3.19	17.5	0.75	4.3	85
336	1	62	3	1	4	600	200	0	1	1	1	100	4.3	1.9	0.3	1.9	0.2	0	43.3	7	43.9	4.8	1	2.91	98	29.2	100.2	33.6	336	53.9	14.9	181	0.16	8.6	15.9	3	3	1	3	20.7612	11.3	0.94	111	26.5	2.92	15.8	4.67	14.5	91.3
494	1	72	4	0	4	600	150	1	1	2	0	95	2.8	1.1	0.3	1.2	0.3	0	38.2	9.7	42.6	8.9	0.6	3.49	109	32.2	92.4	31.3	339	76.5	22.7	157	0.14	9	16	3	3	1	3	24.4261	11.6	0.98	103.3	22.5	2.05	15.7	1.7	5.8	92.9
16	1	69	1	0	3	200	200	1	1	1	0	95	4.7	3.1	1.1	0.4	0.1	0	23.1	8.8	65.3	2.3	0.5	3.49	111	33	94.6	31.7	336	55.8	16.4	171	0.15	8.9	15.9	2	2	0	3	19.3098	10.6	0.92	109.1	26.5	2.53	17.6	1.03	3.7	82.4
4	1	70	4	1	4	800	200	1	1	2	0	100	7.4	4.1	2.5	0.5	0.2	0.1	55.36	34.3	7	2.5	0.6	5	159	45.9	92	31.8	346	46.2	13.8	253	0.21	8.9	16	1	1	1	3	25.2826	9.4	0.8	124.1	27.3	3.42	15.5	0.3	1.8	118.4
352	1	67	2	0	4	400	200	1	1	1	0	100	5.9	1.7	0.6	3.5	0.2	0	28.9	9.3	58.9	2.8	0.1	4.83	168	49.4	102.3	34.8	340	48.9	13.2	153	0.17	10.9	16.9	3	3	1	2	26.7036	10.1	0.84	133.3	27.7	2.99	17.9	1.24	4.6	75.6
257	1	54	4	0	3	800	200	0	1	1	0	100	6	1.9	0.3	3.6	0.2	0	31.9	5.1	59.2	3.4	0.4	4.19	139	41.4	98.9	33.3	336	51.9	14.4	272	0.24	9	15.8	1	1	0	3	22.5827	10.4	0.86	131.5	23.9	2.55	15.9	0.57	2.5	104.9
389	2	60	2	1	2	360	180	0	1	1	0	100	3.7	0.9	0.5	2.3	0	0	24.4	12.3	62.3	0.9	0.1	3.48	109	32.4	93	31.4	336	65.8	19.3	97	0.08	8.4	16	2	0	0	3	22.4059	10.5	0.88	123.7	25.2	2.75	16.6	0.69	3.1	98
410	2	56	3	1	4	390	130	0	1	2	1	100	2.7	0.9	0.5	1.2	0	0	34.2	18.9	45.3	1.5	0.1	3.98	123	37.3	93.8	31	330	47.8	13.8	172	0.21	12	16.3	2	2	0	2	28.8889	10	0.83	139.6	23.6	3.26	15.9	0.22	1.9	85
716	1	27	1	1	2	200	200	1	0	1	0	100	3.2	1.2	0.2	1.8	0	0	36.2	6.5	55.5	1.4	0.4	3.94	124	37.5	95.2	31.5	331	53.8	15.6	122	0.13	11.1	16.3	0	0	0	3	25.5102	10.5	0.91	110.2	25.2	3.75	16.3	0.18	2.1	114.2
500	1	59	4	0	4	600	150	0	1	1	0	100	3.6	0.5	0.3	2.7	0.1	0	13.2	8	75.4	1.9	0.7	3.72	1288	38	102.1	34.3	337	51.3	13.8	100	0.12	12.2	16.7	3	3	1	3	21.7993	11.7	0.98	102	26.6	2.5	15.3	0.26	2	80.8
437	1	68	6	1	4	780	130	0	1	1	0	100	4.8	1.3	0.3	2.7	0.4	0	27.6	6.9	57.2	7.4	0.9	3.84	121	36.4	94.8	31.4	332	46.2	13.3	253	0.29	13.1	16	2	2	1	4	23.5304	10.9	0.94	105.9	25.5	2.32	17.5	0.46	2.3	77.9
757	1	42	1	0	4	220	220	0	0	1	1	100	4.8	1.8	0.3	2.3	0.4	0	37.1	7.1	47	8.7	0.1	4.15	126	38.7	93.2	30.3	326	48.7	14.4	171	0.17	10	16.5	1	1	1	1	18.4965	10.4	0.87	126	23.4	2.38	16.5	0.94	4.6	99.9
496	2	56	4	1	4	520	130	0	1	2	1	100	3	0.7	0.3	1.9	0.1	0	24	11.3	61.6	2.5	0.6	4.01	127	37.9	94.5	31.7	335	45.5	13.3	189	0.23	12	16.4	2	2	0	2	27.4714	10.2	0.85	134.1	22.5	3.33	16.1	0.32	1.9	86.3
325	1	56	8	1	4	1920	240	0	1	1	1	95	5.6	1.3	0.7	3.4	0.1	0	23.7	12.8	61.8	1.5	0.2	3.38	105	32.2	95.2	30.9	326	57.8	16.7	83	0.09	10.7	17.2	3	2	1	3	21.7993	10.873	0.9139	117.643	25.772	3.9301	16.24	0.72945	3.226	91.1567
478	1	39	6	0	4	900	150	0	1	1	0	100	8.6	1.3	0.7	6.4	0.2	0	14.6	8.6	74.5	1.9	0.4	3.82	115	36.5	95.5	30.2	315	66.6	18.9	258	0.25	9.7	15.96	1	2	0	2	17.9163	10.7	0.89	121.7	24.8	4.71	15	0.46	2.4	98.2
10	2	62	3	1	3	360	120	0	1	1	0	90	3.7	3.1	0.2	0.4	0.1	0	82	5.4	10.2	2	0.4	3.56	104	31.2	87.8	29.2	332	54.2	17.1	167	0.15	8.5	15.5	1	1	0	2	23.0112	9.9	0.86	117.4	22.9	3.42	17.8	0.35	1.7	91.3
250	2	65	4	1	3	640	160	0	1	1	0	100	5.3	2.6	0.6	2	0.1	0	48.7	11.4	37	2.4	0.5	3.75	119	36.2	96.4	31.9	329	65.1	18.6	247	0.22	8.8	15.5	1	2	0	2	22.8889	10.6	0.89	124.1	24.2	2.16	17.3	1.53	5.8	94.5
23	1	53	3	1	2	600	200	0	1	1	0	100	5.9	2.7	2.6	0.4	0.2	0.1	43.4	6.6	46	3.2	0.8	3.88	130	38.6	99.7	33.6	337	46.6	12.8	210	0.19	9.5	16.1	2	0	0	3	21.7181	10.7	0.93	108	25.4	2.15	17.8	0.29	1.5	89.6
222	1	76	3	1	4	600	200	0	1	2	0	90	8.3	2.1	0.6	5.2	0.4	0	25.7	7.1	62.2	4.5	0.5	5.07	157	46.9	92.6	30.9	335	46.3	13.8	288	0.22	8.7	15.9	1	2	3	3	25.0995	10.7	0.9	121.7	25.8	3.29	15.4	0.97	4.3	99.6
630	1	51	2	0	4	400	200	0	0	1	1	100	2.8	1.1	0.3	1.3	0.2	0	40.1	8.8	44.8	5.9	0.4	4.17	109	33.9	81.2	26.1	322	46.3	15.7	173	0.15	8.9	16.1	1	1	1	3	22.8374	10.8	0.91	119.5	24.2	3.47	14.3	0.51	2.8	92.2
715	1	57	2	1	2	400	200	1	0	1	0	100	3.8	1.5	0.3	1.9	0.1	0	40.7	6.5	51	1.3	0.5	4.04	131	40	98.9	32.5	329	62.2	17.3	112	0.13	11.6	16.8	0	0	0	3	25.5102	10.6	0.92	109.1	26	3.12	16.6	0.14	1.5	108.8
814	2	64	3	1	4	510	170	1	0	1	0	100	4.1	0.9	0.4	2.8	0	0	21.5	10.8	67.1	0.4	0.2	3.98	136	39.1	98.2	34.1	348	69.1	19.3	124	0.12	9.7	16	2	2	1	3	23.74	10.3	0.89	112.5	20.8	3.37	15.8	1.63	4.4	98.3
791	1	73	2	1	3	280	140	0	0	2	0	100	8.1	1.4	0.7	5.4	0.5	0	17.6	8.7	66.6	6.6	0.5	3.68	102	31.9	86.6	27.6	320	49.3	15.7	193	0.19	9.7	16.2	1	1	0	3	25.9516	11.1	0.93	113	21.2	3.02	15.4	1.38	5.9	72
341	2	72	9	0	4	1080	120	0	1	2	1	100	3.9	1.2	0.41	2.2	0.1	0	31.6	9.3	56.6	2.3	0.1	4.02	135	40.4	100.4	33.6	334	48.3	13	88	0.11	12.5	16.8	1	1	0	3	22.0317	10.9	0.91	117.2	26.2	3.48	16.7	0.8	4.1	95.7
695	1	60	2	1	4	250	125	0	0	1	0	100	4.9	1.8	0.6	2.4	0.1	0	36.2	12.4	48.8	2.1	0.5	3.7	123	36.7	99.3	33.3	335	45.7	12.7	332	0.26	9.1	16	2	2	1	1	25.4028	10.5	0.88	126.5	26.7	3.25	15.2	0.29	2	86.5
204	2	73	5	0	2	600	120	1	1	2	0	100	4.2	1.6	0.4	2.2	0	0	38.6	9.4	51.5	0	0.5	3.08	108	32.2	104.6	34.9	335	52.5	13.7	200	0.21	10.4	16	1	0	0	3	21.1927	10.5	0.88	126.5	24.1	2.4	16.6	0.28	2	101.3
238	1	73	3	0	2	600	200	0	1	2	0	100	3.3	1.1	0.4	1.6	0.1	0	34	12.5	49.3	3.7	0.5	3.97	107	33.6	84.6	27.1	318	79.4	24.5	116	0.11	9.6	16	1	0	0	3	23.9869	11	0.92	115.1	24.6	2.1	17.2	0.74	3.5	79.5
94	1	54	5	0	2	1000	200	0	1	1	0	100	5.6	2.3	2.4	0.7	0.1	0	41.8	43	12.3	2.6	0.3	2.82	102	30.8	109.3	36	330	78.2	19.3	165	0.16	9.8	16.8	2	0	0	2	21.2228	11.4	0.99	100.9	25.9	2.19	16.9	1.65	5.3	83.5
569	2	77	3	1	3	460	180	1	1	2	0	100	3.3	1.3	0.5	1.3	0.1	0	40.4	14.9	40.1	4.3	0.3	2.6	888	26.6	102.3	33.8	331	70.6	19.2	114	0.12	10.5	10	1	1	0	3	22.3478	11.4	0.97	100.9	24.2	2.43	17.2	1.79	6	96.1
714	1	48	2	0	4	280	140	0	0	1	0	100	3.7	1.1	0.4	2.2	0.1	0	28.5	9.6	58.5	2.8	0.6	4.53	139	41.4	91.3	30.6	336	40	12.1	205	0.19	9.2	15.9	1	1	0	2	22.4913	10.6	0.89	121.4	24.1	4.43	16	0.61	2.5	102.4
527	1	77	3	0	3	540	180	0	1	2	0	100	2.2	0.6	0.3	1.2	0.1	0	26	13.4	56.3	3.9	0.4	4.11	120	36.3	88.4	29.3	331	68.8	21.3	55	0.05	8.9	15.5	1	1	0	3	28.0404	11.229	0.9967	100.659	25.081	2.6675	18.433	0.5944	3.022	85.4147
285	1	64	10	0	3	1500	150	0	1	1	0	100	4	1.3	0.3	2.1	0.3	0	31.9	8.6	51.1	7.8	0.6	4.4	140	41.8	94.9	31.8	335	50	14.4	94	0.1	10.4	16.7	1	1	0	3	20.1995	11.2	0.94	111	25.4	2.35	16.9	0.64	3.3	89.8
185	1	71	4	0	2	760	190	1	1	3	0	100	2.7	1.6	0.2	0.9	0.1	0	57.9	7	33.2	1.9	0	3.67	122	37.4	101.9	33.4	326	50.3	13.4	60	0.08	13.2	16.7	2	0	0	3	20.7031	10.8	0.9	121.7	26.8	2.16	17.2	0.19	1.6	76.6
673	1	48	8	1	3	1360	170	0	0	1	0	100	3.8	1.5	0.5	1.7	0.1	0	38.9	13.3	45.5	1.9	0.4	4.04	124	37.6	93	30.7	331	58.8	17.8	249	0.19	7.6	15.4	2	2	2	1	27.4587	10.4	0.87	128.9	24.2	2.52	15.9	1.23	4.7	87.7
764	1	40	1	0	3	150	150	0	0	1	0	100	3.9	1.4	0.3	2.1	0.1	0	36.5	6.6	54.6	17	6	407	129	39.2	96.3	317	329	44.2	12.9	90	0.09	9.8	16.3	1	1	0	3	25.2595	11.5	0.97	103.7	22.5	2.65	16	0.39	1.8	91.2
154	2	70	8	0	4	1200	150	0	1	2	0	100	6.7	2.9	0.9	2.9	0.1	0	42.6	12.7	43.1	1.4	0.2	4.05	127	38.8	95.7	31.4	327	56.5	16.3	138	0.16	11.3	16.1	1	1	1	3	27.5556	12.8	1	100	29.1	4.31	18.6	0.89	4	100
76	1	54	1	1	2	190	190	0	1	1	0	90	4.9	2.9	1.4	0.5	0.1	0	58.6	28.1	10.8	2	0.5	3.68	118	35.6	96.8	32.1	331	63.7	17.9	215	0.2	9.5	15.9	1	0	0	3	19.6283	11.1	0.96	103.9	24.8	2.27	15.8	2.31	6.4	82.6
484	1	63	4	0	4	800	200	0	1	1	0	100	3.7	1.3	0.4	1.8	0.1	0	36.6	10.5	48.8	3.4	0.7	3.93	131	39	99.3	33.4	336	66.2	18.3	85	0.09	11.1	17.1	1	2	1	1	21.2585	10.1	0.84	133.3	26.8	3.58	16.2	0.27	2	106.9
522	1	65	12	0	4	2496	208	0	1	1	0	100	6.3	1.7	0.5	3.3	0.7	0	27.5	8.3	53.2	10.5	0.5	3.1	113	34.2	110.2	36.6	330	69.8	17.1	139	0.1	7.3	16	3	3	1	3	20.9366	11.9	1	98.6	28.5	5	15.4	0.69	3	88.3
278	1	63	2	0	4	400	200	0	1	1	0	100	5	0.3	2.5	1.9	0.2	0	6.4	50.4	38.9	3.6	0.7	3.85	118	35.6	92.5	30.6	331	54.3	16	196	0.21	10.7	15.8	1	2	1	1	21.2585	10.858	0.9139	117.918	25.7704	3.25559	16.547	0.7409	3.203	97.857
69	1	65	5	0	3	1000	200	1	1	1	0	100	2.2	0.9	1	0.3	0	0	41.4	44.1	13.1	1.2	0.2	4.01	135	40.7	101.4	33.7	332	59.8	16.1	63	0.07	10.2	16.6	0	1	0	3	22.8164	11.7	1.02	96.9	25.4	1.92	21.2	0.49	1.7	74.9
532	1	51	3	0	4	540	180	0	1	1	1	100	4.2	1.5	0.4	2.1	0.2	0.1	35.1	8.7	49.7	5	1.5	4.22	142	41.9	99.4	33.5	339	49.3	13.6	142	0.15	10.3	16.4	3	3	1	2	27.3982	11.5	0.97	103.7	25.4	2.34	16.6	0.2	1.8	78.7
189	1	54	3	1	4	660	220	0	1	1	1	100	4.2	1.5	0.4	1.9	0.4	0	36.3	8.8	45.4	9	0.5	3.23	114	34	105.4	35.4	335	77.3	20.1	130	0.14	10.5	16.8	2	2	1	3	20.2449	10.8	0.91	119.5	27.3	1.95	16.4	0.37	2.6	94
272	1	67	7	0	3	1400	200	0	1	1	1	100	4.3	0.9	0.3	3	0.2	0	19.9	7.8	68.2	3.8	0.3	3.55	128	38.1	107.2	336	36.1	68.8	17.9	61	0.06	10.3	17.4	1	1	0	3	21.2245	11.1	0.93	113	22.9	4.45	16.6	6.05	13.7	94.6
523	2	58	1	1	3	200	200	1	1	1	0	100	3.6	1.5	0.4	1.6	0.1	0	41.8	9.8	45.9	1.9	0.6	4.07	102	32.6	80	25.1	313	59.9	20.6	200	0.2	10	16.2	2	2	0	3	23.634	10.1	0.84	136.8	21.8	3.64	14.7	0.67	3	98.3
237	1	46	7	1	3	1400	200	0	1	1	1	90	4	1.6	0.4	1.7	0.3	0.1	39.7	10.4	42.1	6.6	1.2	3.67	129	38.9	106.1	35.3	332	70.8	17.7	179	0.15	8.6	16.2	1	2	0	3	23.8751	11.1	0.93	113	24.2	2.32	18.2	0.35	2.6	103.6
89	2	77	5	1	4	1000	200	1	1	2	0	100	3	1.3	1.2	0.4	0	0	43.9	40.1	14.7	0.9	0.4	2.88	95	28.7	99.5	32.8	330	52.8	14.7	132	0.13	9.9	16.6	1	1	0	4	22.4766	10.9	0.95	105.9	24.4	2.46	18	2.06	7.4	81.6
706	1	69	1	0	4	160	160	0	0	1	0	100	4.7	1.5	0.4	2.8	0.1	0	30.7	8.4	59.4	1	0.5	3.74	114	34	90.8	30.3	335	44.5	13.6	205	0.2	9.8	15.7	3	3	1	2	22.0386	11.1	0.93	113	23.9	2.37	17.4	1.8	6.1	102
118	2	54	3	1	4	540	180	1	1	1	0	100	5.5	0.6	2.9	1.9	0.2	0	10.9	51.7	34.3	2.7	0.4	3.92	125	38.7	98.8	31.8	323	55.6	15.4	260	0.23	9.3	15.9	3	3	1	3	21.2306	10.2	0.84	136.8	25.1	3.32	15.6	0.4	2.1	85.5
126	1	62	2	1	3	240	120	0	1	1	0	100	7.9	0.4	5.7	1.7	0	0	5.2	72.5	21.6	0.5	0.2	4.02	129	38	94.6	32	339	54.3	16	255	0.2	8.8	16.1	0	1	0	3	21.2245	12.5	1.06	88.8	26.7	2.52	15.4	0.79	3.9	110.4
824	2	40	1	0	2	200	200	0	0	1	0	100	3.6	1	0.3	2.1	0.1	0	28	8.1	59.5	3.9	0.5	3.63	98	29.9	82.2	27.1	329	53.3	17.8	190	0.22	11	16	2	0	0	2	31.051	10.7	0.93	108	24.3	2.65	19.7	0.46	2.1	87.3
290	1	64	5	0	3	750	150	0	1	1	0	100	2.2	1	0.4	0.7	0.2	0	45.7	16	30.2	7.3	0.8	4.26	129	38.9	91.4	30.2	332	47.2	14.2	141	0.13	10	16.9	1	1	0	3	21.7776	11.2	0.94	111	25.2	2.48	15	0.7	3.3	84.2
239	1	51	2	0	4	360	180	0	1	1	1	90	4.2	1.5	0.4	2.2	0.1	0	35.3	10.4	51.4	2.7	0.2	4.32	140	41.8	96.8	32.3	335	56.6	16	128	0.13	9.8	16.2	3	3	1	2	26.7299	11.6	0.98	103.3	25.2	2.13	17.4	0.18	1.8	81.2
1	1	64	1	0	3	200	200	1	1	1	0	100	6.5	3.4	2.4	0.4	0.3	0.1	52	37.1	5.4	4.2	1.3	4.85	146	43.9	90.5	30.1	332	48.1	14.7	247	0.24	9.8	15.8	2	1	0	3	24.093	10.3	0.89	112.5	23.2	3.84	16.4	1.28	4.9	103
821	2	40	4	0	2	800	200	0	0	1	0	100	3.2	1.2	0.2	1.7	0.1	0	37.7	7	52.7	2.2	0.4	3.59	101	31.4	87.6	28	320	60.2	19	143	0.18	12	16.3	2	0	0	2	31.051	10.5	0.91	110.2	24.2	2.84	15.8	0.29	1.7	102
573	1	70	5	1	2	750	150	1	1	2	0	100	4.9	1.5	0.3	3	0.1	0	30.8	6.8	61.3	1	0.1	4.39	140	42.3	96.3	31.9	331	51.7	14.7	201	0.19	9.3	15.6	1	0	0	2	22.8571	10.4	0.86	128.3	23.5	2.79	16.4	0.27	1.8	87.8
739	1	60	3	0	4	360	120	0	0	1	1	100	6.1	1.2	0.3	4.5	0	0	19.8	4.6	74.8	0.6	0.2	4.58	145	43.2	94.4	31.7	336	45.4	13.2	144	0.17	11.7	16.3	2	2	1	4	21.0938	10.6	0.89	124.1	27.1	2.4	16.8	0.38	2.6	109.1
396	2	61	10	1	4	1500	150	1	1	1	1	100	2.5	1.2	0.2	1	0.1	0	48	8.5	40.2	2.7	0.6	3.82	117	35.3	92.5	30.6	331	53.2	16.3	98	0.09	9.3	16.2	2	1	1	2	22.6562	10.9	0.91	119.4	23.1	1.93	17.3	1.14	5.3	94.8
480	1	56	8	0	4	1200	150	0	1	1	0	100	5.8	1.2	0.3	4.2	0.2	0	20.2	4.5	72.5	2.7	0.1	4.82	146	44.6	92.5	30.3	327	48.2	14.2	294	0.27	9.3	15.9	2	1	1	3	24.6914	10.7	0.9	119.2	25.8	4.7	16.2	0.49	2.3	95.8
487	1	70	4	0	4	640	160	1	1	2	0	100	5	1.1	0.6	3.2	0.1	0	227	11.5	64.2	1.2	0.4	3.29	111	32.6	99.1	33.8	340	74.5	207	184	0.17	9.4	16	3	3	1	2	22.0386	10.9	0.91	117.2	25.9	3.72	16.4	2.36	7.4	90
279	1	58	3	1	4	627	209	0	1	1	1	100	5.6	1.3	0.7	3.6	0.1	0	22.7	11.8	64.4	0.9	0.2	3.97	125	37.6	94.6	31.5	332	56.5	16.9	175	0.14	7.8	15.6	1	0	1	3	17.9151	11.1	0.93	113	25.4	2.74	16.9	2.82	10	102.9
780	1	64	2	0	2	400	200	0	0	1	0	100	5.9	1.9	0.6	2.9	0.5	0	31.7	10	48.8	8.9	0.6	3.88	124	37.3	96.2	31.9	332	68.5	20	169	0.18	10.4	16.2	1	0	0	4	22.5309	11.9	1	98.6	24.7	2.9	15.6	0.55	2.8	84.3
117	1	72	2	0	4	360	180	1	1	2	1	100	3.8	0.3	1.9	1.4	0.1	0	8.3	50.5	37.8	3	0.4	3.65	116	34.3	94.1	31.8	338	61	18.4	129	0.14	10.9	16.3	2	0	0	2	21.6128	11.9	1.01	98.1	26.2	1.74	17.1	0.96	4.1	73.3
229	2	72	8	0	4	960	120	0	1	2	1	100	2.8	1.2	0.2	1.4	0.1	0	41.1	8.2	48.5	1.7	0.5	3.77	126	38	100.8	33.6	332	49.4	13.3	86	0.09	10.4	16.5	1	1	0	3	22.0317	11.3	0.94	111	26.2	3.19	16.8	0.53	2.9	91.5
586	1	65	8	1	4	1120	140	1	1	1	0	100	8.8	1.3	0.6	6.8	0.1	0	14.5	6.4	77.6	1	0.5	4.12	121	37.7	91.4	29.5	321	49.4	14.9	157	0.15	9.4	16	2	1	1	3	17.3745	10.9	0.92	115	24.5	3.12	19.2	1.5	5.2	82.6
440	1	68	9	1	4	1170	130	0	1	1	0	100	7.5	0.9	0.4	6.1	0.1	0.1	12.5	5	80.9	0.9	0.7	3.65	114	34.5	94.6	31.1	330	48.6	14.1	283	0.3	12.5	16.5	2	2	1	4	21.4536	10.5	0.91	110.2	23.7	2.49	17.2	0.45	2.9	73.6
766	1	62	1	0	4	120	120	0	0	1	1	100	4.5	1.4	0.4	2.5	0.1	0	32.2	9.1	56.6	1.8	0.3	4.2	121	37.3	88.9	28.8	324	53.3	16.4	304	0.26	8.5	15.5	3	3	3	1	17.9592	10.7	0.9	119.2	23.6	4.07	14.3	1.36	5.5	91.6
275	2	62	6	0	3	900	150	0	1	1	1	100	1.8	0.4	0.1	1.2	0.1	0	20	7.4	68.2	3.6	0.8	3.67	125	37.3	101.6	34.1	335	50.8	13.7	55	0.04	9.9	16.7	0	0	0	1	18.662	10.9	0.91	119.4	25.1	2.3	16.8	0.28	2.1	92.2
319	2	63	2	1	2	360	180	0	1	1	0	100	4.3	1	0.3	2.9	0.1	0	23	8	66.7	2.1	0.2	3.85	112	34.1	88.7	29.1	328	66.9	20.5	264	0.22	8.3	15.1	1	0	0	3	22.4766	11	0.92	117.2	24.7	3.5	16.2	0.56	3.8	101.7
570	2	77	4	1	3	560	180	1	1	2	0	100	3.7	1.5	0.9	1.2	0.1	0	39.5	23.8	33.4	3.1	0.2	2.89	95	29.2	101.1	32.9	325	64.9	17.5	107	0.09	8.8	16	1	1	0	3	21.5045	11.1	0.93	113	22.3	3.91	16.6	1.24	4.2	83.3
145	2	76	2	0	4	200	100	0	1	2	0	95	8.9	0.9	5.4	2.3	0.3	0.1	10.4	60.4	25.3	2.8	1.1	3.58	111	34.8	97.1	31.1	319	57.7	16.4	279	0.25	9	15.8	3	3	1	2	25.3331	10.7	0.9	121.7	22.2	2.91	17.9	0.91	4.1	88.4
597	1	75	1	1	4	180	180	0	0	2	0	100	3.8	2.5	0.9	0.3	0.1	0	65.6	23.4	8.5	2.2	0.3	3.82	83	27.1	71	21.8	306	71.2	27	199	0.17	8.5	15	1	1	0	2	23.6244	11.4	0.99	100.9	26.4	3.05	16.1	1.41	4.3	73.9
526	1	60	3	0	3	600	200	0	1	1	0	100	5	1.2	0.4	3.2	0.1	0	24.5	8.5	63.9	2.4	0.7	3.58	118	35.6	99.4	33	331	58.9	16.2	152	0.14	9.1	15.8	2	1	0	3	20.679	11.1	0.93	113	24.6	3.02	15.5	0.54	2.5	80.8
755	1	62	2	0	2	400	200	0	0	1	0	100	3.5	1.3	0.3	1.8	0.1	0	35.7	9.4	50.7	3.1	1.1	4.74	140	41.7	88	29.6	336	48	15.2	98	0.14	13.9	16.5	1	0	0	3	24.5675	10.857	0.9133	117.339	31.883	3.5905	16.5	0.7594	3.263	100.699
605	1	51	3	1	3	420	140	0	0	1	0	100	5.8	3.5	1.5	0.5	0.2	0	61.5	26.7	8.6	2.9	0.3	4.34	130	37.9	87.4	29.9	342	52.3	16.2	112	0.11	10.1	16.3	2	1	0	3	27.4506	11.2	0.97	102.9	27.2	2.57	17.2	0.47	1.9	81.3
370	2	76	4	0	4	400	100	0	1	2	0	95	9.7	2.4	0.7	6.2	0.4	0.1	24.3	7.3	64.3	3.6	0.5	3.66	117	36.2	98.9	32	323	50.7	14	188	0.18	9.5	16.1	3	3	1	2	24.3232	10.6	0.88	123.6	23.9	2.59	17.8	0.86	3.5	83.3
269	2	64	4	0	4	400	100	0	1	1	1	100	3.4	0.9	0.4	1.9	0.2	0	26.8	11.1	55.8	5.2	1.1	3.79	117	36	95.1	31	325	52.6	15.4	190	0.28	14.8	16.1	2	1	3	2	19.5556	10.879	0.9132	118.066	25.362	2.869	16.1	0.7544	3.279	92.558
587	1	65	7	1	4	980	140	1	1	1	0	100	7.7	1.3	0.5	5.8	0.1	0	17	6.3	75.3	1.2	0.2	4.04	118	36.6	90.7	29.3	322	46.2	13.9	170	0.16	9.1	15.9	2	1	1	3	17.3745	11.4	0.95	107.3	24.8	3.29	15.9	1.33	4.9	77.9
308	1	54	5	0	3	700	140	0	1	1	0	100	5.2	2.4	0.5	2.2	0	0	46.6	10.3	42	0.7	0.4	4.66	151	46	98.7	32.4	328	54.2	15.1	194	0.21	10.6	16.7	1	2	0	1	22.7732	10	0.83	139.6	29.4	2.75	16.2	0.81	1.8	115.8
311	1	79	5	1	4	900	180	1	1	2	0	100	7.3	0.5	0.6	5.6	0.5	0.1	7.4	8.2	77.3	6.4	0.7	3.24	4120	35.3	108.8	37	340	59.5	17.6	172	0.15	8.9	16.3	1	2	1	1	24.3375	11.4	0.95	109	27.9	5.89	15.7	1.79	7.9	79
642	2	51	1	1	2	180	180	0	0	1	1	100	7	0.4	4.7	1.5	0.4	0	5.3	67.5	21.2	5.6	0.4	4.54	106	34	75	23.3	311	55.1	20.4	355	0.32	9	15.6	1	0	0	3	25.2174	11.5	0.96	107.1	27.3	4.76	15.7	0.33	2.1	109.9
47	1	70	4	1	4	720	180	1	1	2	0	100	5.5	3.1	1.6	0.5	0.3	0	56.6	28.5	9.7	4.6	0.6	4.07	144	42	103.1	35.4	343	66.6	17.7	112	0.14	12.5	16.5	1	1	0	3	22.3081	10.1	0.88	114.9	25.7	3.35	17.2	0.57	2.6	92.9
350	1	48	10	1	3	1700	170	0	1	1	0	100	5.1	1.9	0.5	2.7	0.1	0	36.9	9	52.2	1.3	0.6	4.77	141	42.7	89.5	296.6	330	47.8	14.8	140	0.14	9.9	16.6	2	2	2	1	27.4587	10.2	0.85	134.1	25.4	3.72	17.3	0.37	2.2	116.7
372	1	44	4	0	2	800	200	1	1	1	1	100	7.2	2.6	0.6	3.6	0.4	0	35.9	8.3	50.5	4.9	0.4	4.81	155	45.6	94.7	32.3	340	58.7	17.2	221	0.21	9.6	16.4	1	0	0	3	24.3046	10.2	0.85	133.3	23	2.59	16.3	0.25	1.3	112.1
542	2	56	1	0	2	150	150	0	1	1	1	100	4.6	1.8	0.3	2.4	0.1	0	38.2	6.6	52.8	2	0.4	3.91	112	34.2	87.5	28.7	327	52.6	16.7	258	0.22	8.7	15.5	1	0	0	3	19.5312	10.3	0.85	130.8	24	2.07	16.3	1.18	4.6	100.2
262	1	64	1	0	4	200	200	1	1	2	1	100	4.2	1.4	0.3	2.4	0.1	0	32.5	7.6	56.8	2.8	0.3	4.01	122	37.8	94.2	30.6	323	52.7	15.3	96	0.11	11.5	16	3	1	0	3	18.7109	10.9	0.91	117.2	25.5	3.22	16.5	0.22	2	86.7
196	2	72	2	1	4	390	195	0	1	2	1	90	6.8	1.8	0.5	4.4	0.1	0	26.6	6.7	64.6	1.6	0.5	3.77	117	34.6	91.7	31	338	52	16.2	193	0.17	8.8	16	3	3	1	2	26.4792	10.5	0.88	126.5	24.9	3.19	14.6	3.28	10.4	113.3
829	1	86	2	0	3	200	100	0	0	2	1	75	7.8	0.6	0.5	6.6	0.1	0	8.1	6	84.7	0.9	0.3	3.44	81	27.6	80.3	23.5	293	83.4	28.2	271	0.21	7.8	15	1	2	3	2	23.4236	11.3	0.95	107.3	29.6	4.56	16.5	2.6	8.2	90.8
696	1	60	1	1	4	125	125	0	0	1	0	100	5.1	1.4	0.6	2.9	0.2	0	28.2	11.5	56.4	3.4	0.5	3.79	128	38.4	101.2	33.9	333	48.2	13.1	283	0.25	9.3	15.8	2	2	1	1	25.4028	10.7	0.9	121.7	26.2	3.67	14.6	0.35	2	104.7
108	2	58	6	0	3	1200	200	1	1	1	1	100	3.3	1.1	0.4	1.9	0	0	31.7	10.7	56.2	1.2	0.2	3.66	121	35.7	97.6	32.9	339	45.5	12.8	77	0.07	8.8	16.8	2	1	3	3	21.4844	10.8	0.94	107	26.1	3.06	15.6	0.42	2	88.9
60	1	66	5	1	3	650	130	0	1	1	0	100	4.5	2.3	1.4	0.5	0.3	0	50.1	31.7	11.6	5.8	0.8	4.51	123	37.2	82.4	27.2	330	56.2	18.4	259	0.22	8.3	15.9	2	1	0	3	21.3039	9.8	0.84	118.7	22.9	2.26	17	0.85	2.8	89.7
667	1	36	6	0	3	960	160	0	0	1	0	100	4.3	1.7	0.4	2.2	0	0	38.7	9.4	50.7	0.8	0.4	4.61	139	41.1	89.1	30.1	338	47.6	14.7	182	0.17	10	16.4	1	2	2	3	28.4005	11	0.92	117.2	26.5	2.79	15.6	0.44	2.6	83.2
548	2	72	3	1	3	540	180	1	1	2	0	100	4.5	0.9	0.3	3.3	0.1	0	19.6	6.2	72.5	1.5	0.2	4.65	151	45.2	97.3	32.5	334	48.9	13.8	143	0.12	8.4	15.8	1	2	0	3	27.8852	10.9	0.91	117.22	28.9	3.72	15.4	1.63	5.9	102
101	2	55	1	0	3	200	200	0	1	1	0	100	3.7	1.1	0.3	2.3	0	0	28.9	8.9	61.5	0.6	0.1	3.37	111	34.6	102.7	33.1	321	60.3	16	176	0.18	10.3	17.1	1	1	0	3	21.9671	10.5	0.91	110.2	23.8	2.73	15.1	1.48	4.6	103.7
738	1	47	1	1	3	140	140	0	0	1	1	100	3.1	1.2	0.4	1.5	0.1	0	37.7	11.3	48.4	2.1	0.5	4.25	103	33.1	77.9	24.1	311	44.6	15.8	216	0.2	10.7	16.1	0	2	0	2	20.7612	10.7	0.9	121.7	25.7	2.48	14.6	0.35	2	96.6
746	1	79	3	1	4	360	120	0	0	2	1	100	3.1	0.9	0.3	1.7	0.2	0	27.6	10.9	55.2	5.5	0.8	3.95	116	35.3	89.4	29.3	329	52.1	16.1	150	0.13	8.6	15.8	1	1	1	3	21.7738	11.1	0.94	111	25.9	3.58	15.7	0.74	3.3	79.7
603	1	65	1	0	3	140	140	0	0	1	1	100	1.8	0.9	0.7	0.2	0.1	0	49.9	35.9	10.2	3.3	0.7	4.07	93	28.9	71	22.9	322	67.4	25.7	158	0.11	7.2	14.8	0	1	0	3	20.0692	11.4	0.99	100.9	24.8	2.11	17.1	1.92	6.1	84.3
795	1	65	1	1	3	170	170	0	0	1	0	100	5.4	1.6	0.4	3.1	0.1	0	30.6	8.1	58.5	2.4	0.4	3.72	115	34	91.4	30.9	338	44.8	13.5	170	0.14	8.3	15.6	2	1	0	3	18.8189	11	0.92	115.1	23.4	3.4	15.2	0.19	1	100.1
180	1	65	4	1	4	600	150	1	1	1	0	100	3.6	1.7	0.6	1.1	0.1	0	46.3	17.3	32.2	3.3	0.9	4.03	106	33.9	84	26.4	313	71.8	23.4	89	0.08	8.4	15.2	2	2	3	3	23.1481	12	1.01	98.1	28.6	2.65	16.6	0.33	2.3	69.3
305	1	70	3	0	4	480	160	1	1	2	0	100	6	1.3	0.3	4	0.1	0	22.1	9.3	67.1	1.3	0.2	3.64	118	34.7	95.3	32.5	340	64.7	18.8	190	0.18	9.4	15.7	3	3	1	2	22.4059	10.9	0.91	119.4	25.4	3.58	16.4	3.9	10.8	93.3
449	1	60	2	0	3	400	200	0	1	1	0	100	5.5	1.1	0.5	3.7	0.2	0.1	20.5	8.6	66.5	3.3	1.1	3.67	118	35.3	96.2	32.1	334	55.8	16	145	0.12	8.4	15.5	2	1	0	3	20.679	10.6	0.88	123.6	25.7	2.74	16.2	0.43	2.5	81.5
498	1	74	3	1	3	600	200	0	1	2	1	100	6.7	1.5	0.7	4.2	0.4	0	22.2	9.8	62.4	5.4	0.2	3.65	116	34.8	95.3	31.7	33	74.3	21.7	198	0.19	9.6	15.9	0	1	0	3	23.768	12.4	1.05	91	25.5	4.2	14.4	0.44	2.1	86.9
800	2	57	1	0	2	180	180	0	0	1	0	100	3.2	1.1	0.3	1.8	0.1	0	33.1	9.6	55	1.9	0.4	3.92	84	27.8	70.9	21.5	302	72.9	30.5	186	0.15	8.1	15.1	1	0	0	3	19.5312	11.8	0.99	100.3	26.2	2.32	15.7	1.99	6.7	73.6
150	1	79	4	1	3	600	150	0	1	2	0	100	7.7	2.2	0.7	4.6	0.1	0.1	29.1	9.3	59.9	1.1	0.6	4.05	127	39.1	96.5	31.3	325	84.6	24.3	246	0.23	9.4	16	2	2	0	2	24.9135	10.3	0.95	110	24.5	2.89	15.5	1.72	5.7	86.7
125	1	73	5	0	4	1000	200	0	1	2	0	100	6.2	0.8	4.1	1.1	0.3	0	12.3	65.4	17.4	4.3	0.6	4	106	33.2	83.1	26.5	319	94	31.5	236	0.17	7.9	15.3	1	2	0	3	24.1415	10.4	0.86	131.5	27.9	3.32	14.6	1.63	5.4	80.9
658	1	53	5	1	4	750	150	0	0	1	0	100	7.4	1.6	0.4	5.5	0	0	20.8	4.8	73.8	0.5	0.1	4.7	147	43.1	91.7	31.2	341	43.7	13.1	153	0.16	10.4	16.6	1	2	1	3	24.6244	9.6	0.8	151.7	23.4	3.25	16.7	0.42	2.6	112.4
722	2	73	1	1	3	100	100	0	0	2	1	100	2.8	1.4	0.2	1.2	0.1	0	49.4	5.7	42	2.5	0.4	3.88	113	33.8	87.2	29.1	334	45.8	14.9	148	0.12	8	15.5	1	2	0	3	30.0781	10.881	0.9134	118.17	24.3488	2.4061	16.533	0.7561	3.203	98.524
186	2	68	4	1	3	480	120	0	1	1	0	100	4.4	1.2	0.5	2.6	0	0	27.3	12.2	59.4	0.9	0.2	4.97	145	43.8	88.2	29.1	331	89.5	28.2	129	0.12	9.3	15.8	1	2	0	1	22.2656	9.2	0.76	165.3	21.7	3.47	17.4	0.97	4.1	133
560	1	54	13	1	4	1950	150	0	1	1	0	100	5.5	0.8	0.5	4.1	0.1	0	15.1	8.6	74.2	1.7	0.4	4.45	143	42.7	96	32	335	45.9	13.2	173	0.15	8.6	16	1	2	1	3	23.3844	10.871	0.9134	117.42	25.5434	3.2191	16.213	0.6895	3.254	87.268
51	1	43	5	0	2	1000	200	0	1	1	0	90	4.6	2.1	2	0.3	0.1	0	45	44.4	7.4	2.2	1	4.25	147	42.6	100.2	34.6	345	50.8	13.9	222	0.29	15.8	2.39	2	0	0	3	20.6612	9.7	0.84	120	25.9	2.73	17.2	0.22	1.6	106.8
501	1	73	6	0	3	1200	200	0	1	2	1	100	2.7	0.7	0.4	1.4	0.1	0	26.4	15.8	51.77	4.9	1.2	3.52	106	33.4	94.8	30.2	317	87.1	25.4	167	0.15	8.8	15.5	1	1	1	1	21.3839	11.3	0.95	1077.3	25.3	2.42	15.2	0.36	2.1	75.3
447	2	73	1	1	3	180	180	0	1	2	0	100	9.6	1	1.1	7.4	0	0	10.6	11.6	77.3	0.2	0.3	3.79	112	33.4	88.1	29.5	335	44.6	14.1	271	0.21	7.7	15.7	1	1	0	3	19.8141	10.7	0.89	121.4	24.8	4.85	14.3	0.98	3.6	96.2
819	1	55	1	0	2	200	200	0	0	1	0	100	4	1.4	0.5	2	0.1	0	35	13.3	49.4	1.6	0.7	3.99	108	33.3	83.5	27	323	48.2	15.8	277	0.21	8.2	15.5	2	0	0	3	26.9896	10.7	0.93	108	25	1.95	18.8	0.68	2.3	77.9
807	1	69	1	0	4	120	120	0	0	3	1	100	2.7	1	0.5	1.2	0	0	37.3	16.8	44.5	1	0.4	3.53	110	33.5	94.9	31.1	328	44	12.8	163	0.15	9.2	15.6	1	2	1	3	18.8268	10.6	0.89	121.4	24.7	2.16	16	0.65	2.8	79.7
322	1	56	11	1	4	2640	240	0	1	1	1	95	5.4	1.1	0.6	3.6	0.1	0	20.6	10.6	66.6	1.8	0.4	3.22	102	30.9	96	31.8	330	60.4	17.1	94	0.1	10.7	16.7	3	2	1	3	21.7993	10.87	0.9136	128.448	26.635	4.4864	15.989	0.74205	3.291	90.1977
354	1	67	2	0	4	400	200	0	1	1	0	100	3.5	1.3	0.4	1.8	0.1	0	36.3	9.9	50	3.6	0.2	4.01	91	29	72.2	22.8	314	52.1	19.8	274	0.24	8.6	15.4	1	1	1	3	23.8751	11.8	0.99	100.3	25.7	2.85	15.7	1.24	2.5	63.3
768	1	79	4	1	4	480	120	0	0	2	1	100	9.5	1.2	0.6	7.6	0.1	0	12.8	6.3	80	0.6	0.3	3.87	115	35.2	90.9	29.7	327	64.4	16.4	108	0.1	9.6	16	1	1	1	3	21.1927	11.1	0.94	111	26.1	2.6	177	0.94	3.8	80.77
143	1	67	3	1	3	360	120	0	1	1	0	100	4.7	0.4	2.5	1.6	0.3	0	8.5	52.2	33	5.8	0.5	3.96	103	30.8	77.9	26.1	334	52.4	18.5	161	0.06	9.5	15.9	2	0	0	3	20.3816	10.9	0.91	117.2	26.3	3.36	13.9	1.31	3.7	85.2
371	2	72	5	1	3	750	150	0	1	2	0	100	3.1	1	0.3	1.7	0.1	0	32.4	9	55.1	3	0.5	3.27	93	30.7	94	28.6	303	74.1	22.1	200	0.2	9.9	15.7	2	1	0	2	26.6389	10.7	0.89	121.7	24.5	2.54	16.5	1.18	4.2	90.5
142	1	65	2	1	4	300	150	1	1	1	0	100	8.1	0.9	4.8	2.2	0.1	0	11	60	27.2	1.6	0.2	4.47	103	30.8	77.9	24.7	311	73.9	25.7	149	0.12	8.2	15.2	2	2	3	3	22.5309	11.3	0.95	109	26.3	3.32	15.7	0.73	3.1	82.8
400	2	69	7	1	3	1400	200	1	1	1	0	100	2.5	1.1	0.4	0.8	0.1	0	44.5	15.6	33.7	5.7	0.5	3.18	100	30.9	97.3	31.4	324	48.1	13.7	92	0.1	11	16.9	1	1	0	3	17.9931	10.2	0.85	134.1	22.8	2.48	16.4	2.09	7.8	98.9
264	2	62	1	0	3	170	170	1	1	1	1	100	4.3	1.4	0.3	2.5	0.1	0	31.5	7.6	59.1	1.4	0.4	3.88	121	37.2	96	31.1	325	53.6	15.3	154	0.15	9.7	15.7	1	1	0	3	21.2084	10.9	0.91	117.2	26.3	3.09	16.6	1.42	5.6	92.8
321	1	56	12	1	4	2880	240	0	1	1	1	95	5.6	1	0.7	3.9	0.1	0	17.6	11.9	69.4	1.1	0	3.22	100	30.2	93.8	31.2	331	58.3	16.9	104	0.12	11.1	17.2	3	2	1	3	21.7993	12	1.02	96.5	29.9	6.17	15.9	1.31	5.3	102.5
20	1	70	4	1	4	800	200	1	1	2	0	100	7.3	3.6	3	0.5	0.2	0	49.2	41.2	6.8	2.2	0.6	4.28	116	35.9	83.9	27.1	323	76.8	24.7	87	0.09	10.1	15.7	1	1	0	3	25.7117	10.8	0.94	107	26.8	2.7	16.1	0.41	2.1	93.6
173	2	60	4	1	4	520	130	0	1	1	0	100	5	1.4	0.5	3	0.1	0	27.7	10.8	59.4	1.6	0.5	4.27	110	34.9	81.8	25.8	315	46.6	15.9	217	0.21	10.3	16.5	1	0	3	3	23.7332	10.2	0.85	134.1	24.4	2.4	16.6	0.25	1.8	84
677	1	58	2	1	3	400	200	0	0	1	1	100	4.5	1.3	0.5	2.5	0.2	0	29.5	10.1	55.8	4.2	0.4	4.72	138	42.4	89.9	29.3	325	61.4	19.1	135	0.15	10.9	16.2	1	1	0	3	20.148	10.2	0.85	134.1	24.9	2.4	17	0.34	2.4	86
313	1	72	4	1	4	800	200	0	1	2	1	100	5.4	1.1	0.5	3.7	0.1	0	20.8	9.5	67.5	1.8	0.4	3.36	102	32.5	96.8	30.5	314	78.9	22.8	133	0.11	8.5	15.8	3	3	1	1	21.048	11.1	0.93	115.1	25.3	4.63	14.7	0.99	4.2	127.2
391	1	63	5	0	4	900	180	0	1	1	1	100	5	0.6	0.6	3.5	0.2	0	12.9	11.7	70.7	4.1	0.6	3.84	128	38.1	99.1	33.4	336	60.5	16.9	119	0.12	9.6	15.9	1	2	0	3	17.3061	11.1	0.93	113	24.8	2.89	15.6	0.32	1.9	83.8
774	1	58	2	0	4	400	200	0	0	1	0	100	3.7	0.9	0.4	2.3	0.1	0	24.6	10	62.9	2.1	0.4	4.38	146	42.9	98	33.4	340	61.5	17.4	164	0.16	9.8	16.3	1	1	0	1	23.6614	10.5	0.87	126	26	2.35	16.1	0.52	2.5	107.4
13	2	63	5	1	3	600	120	1	1	1	0	90	9.1	7.5	0.9	0.7	0	0	82.7	9.5	7.2	0.4	0.2	3.39	100	29.5	86.9	29.5	340	59.7	18.4	162	0.14	8.4	16	1	1	0	2	23.0112	10.5	0.91	110.2	21.8	3.55	17.1	0.34	1.2	88.4
408	1	61	5	1	4	650	130	0	1	1	0	100	7.9	1.2	0.7	5.6	0.3	0.1	15.2	9.3	70.8	3.9	0.8	3.8	122	37.1	97.7	32.2	329	49	13.8	225	0.22	9.9	16.1	0	3	1	3	18.4425	10.3	0.86	131.15	28.8	2.83	16.3	0.61	2.5	99.5
409	1	69	6	1	4	1200	200	1	1	1	1	100	7.8	1.6	0.5	5.4	0.2	0.1	21	6.3	69.1	3	0.6	4.05	122	36	88.9	30.2	339	45.6	14	342	0.31	9.1	15.6	2	0	1	3	27.7551	10.9	0.91	117.2	25.1	6.95	15.6	0.95	3.7	97.9
306	1	58	3	0	4	450	150	0	1	1	1	100	5.8	1.6	0.4	3.5	0.3	0	26.7	7	60.6	5.3	0.4	3.94	135	40.9	103.7	34.4	330	74	109.9	149	0.14	9.1	16.4	1	1	0	3	25.1543	10.3	0.86	131.5	30.3	2.63	17.9	0.37	2.6	83
355	2	65	5	1	3	800	160	0	1	1	0	100	4.3	2.3	0.4	1.5	0.1	0	52.8	10.1	35.1	1.6	0.4	3.46	117	34.7	100.2	33.8	337	66.8	18.1	176	0.16	9.1	15.8	1	2	0	2	23.1111	10.7	0.9	119.2	23.9	2.55	16.7	1.49	4.9	96.6
26	2	53	4	0	4	680	170	0	1	1	0	80	3.2	1.9	1	0.2	0.1	0	59.9	29.9	7.3	2.7	0.2	1.62	57	17.4	107.5	35.1	326	59.6	15.2	5	0.01	12.7	16.9	1	1	1	3	18.7962	11.8	1.03	95.4	26.7	4.43	14.8	5.22	13.6	98.4
618	2	62	4	0	4	720	180	0	0	1	0	80	5.5	3.7	1.4	0.3	0.1	0	67.7	25.4	4.4	2.2	0.3	4.32	115	35.3	81.7	26.6	325	58.3	19.8	230	0.27	11	15.8	2	1	1	3	21.8522	10.8	0.94	107	24.7	4.63	16	1.91	5.8	93.7
170	2	60	7	1	4	910	130	0	1	1	0	100	5.2	1.3	0.5	3.3	0.1	0	24	9.9	64.3	1.4	0.4	4.01	102	32.8	81.8	25.5	311	56.8	19.3	253	0.25	9.9	16.2	1	0	3	3	23.7332	10.9	0.91	117.2	24.5	7.02	15.5	0.33	2.4	93.7
39	2	60	3	0	2	450	150	1	1	1	0	100	2.8	0.9	1.4	0.4	0.1	0	31.6	51.7	13.9	2.5	0.3	3.42	117	34.9	102	34.3	336	61.9	16.4	68	0.07	10.2	16.6	1	0	0	3	24.8875	11.5	1	100	25.1	3.42	19.2	0.3	1.5	86.3
176	1	52	2	1	4	400	200	1	1	1	0	100	7.8	2.6	0.7	4.3	0.2	0	32.9	8.3	55.6	2.7	0.5	4.97	152	45.7	91.9	30.5	333	46.4	13.9	200	0.2	9.8	16.4	1	2	0	1	28.7105	9.9	0.82	145.4	24.7	2.7	16.2	0.31	2.1	97
246	1	88	5	0	4	500	100	0	1	2	1	90	4.5	1.3	0.6	2.5	0.1	0	28.2	13.2	56.1	2	0.5	2.87	90	27.9	97.1	31.4	323	53.3	15.1	206	0.17	8.4	15.9	1	1	0	3	17.5697	11.8	1	99.8	28.1	4.75	15.8	0.86	4.9	66.2
299	1	65	10	0	4	2080	208	0	1	1	0	100	5.7	1.4	0.6	3	0.7	0	24.3	9.7	52.8	12.5	0.7	2.89	109	32.9	113.9	37.6	331	78.1	18.6	155	0.12	7.7	16.2	3	3	1	3	22.0386	11.7	0.99	101.6	25.7	4.22	15.4	1	3.9	94.3
692	1	78	6	0	3	960	160	0	0	1	0	100	3.7	2	0.3	1.3	0.1	0	54	9.2	34.7	1.8	0.3	4.56	129	40.7	89.3	28.3	317	52.9	16.4	191	0.2	10.4	16	1	2	0	3	28.4005	12.5	1.06	90.3	29	1.65	17.5	0.32	2.3	77.9
417	1	73	5	0	3	1000	200	0	1	2	1	100	2	0.8	0.2	0.9	0.1	0	40.7	10.6	42.9	4.3	1.5	3.68	112	34.4	93.5	30.5	326	76.1	22.2	151	0.13	8.5	15.4	1	1	0	1	21.9713	11.6	0.98	103.3	25.9	2.18	15.4	0.37	2.1	70.1
785	1	86	1	0	3	100	100	0	0	2	1	75	3.1	0.5	0.4	2.2	0	0	15.5	12.8	69.6	1.4	0.7	3.28	71	23.9	73	21.6	297	87.8	32.6	172	0.14	8.4	15.2	1	2	3	3	23.0518	11.5	0.97	105.2	28.2	4.45	14.8	1.87	6.9	90.9
273	1	76	4	1	3	600	150	0	1	2	1	100	6.7	1.1	0.5	4.9	0.2	0	15.9	7.4	73	3.6	0.1	4.59	137	41.3	90	29.8	332	45.5	13.7	192	0.21	11	16.3	1	2	0	2	27.6817	11.5	0.96	107.1	26.4	4.19	15.3	0.78	4	83.8
474	1	47	9	1	3	1260	140	0	1	1	1	100	3.8	1	0.3	2.4	0	0	27.1	8	63.8	0.88	3	3.69	111	33.2	90	30.2	334	457	14	125	0.13	10.2	16.2	0	2	0	2	22.4913	10.7	0.9	119.2	23.9	3.58	15.9	0.49	2.8	102.4
634	2	63	2	1	2	240	120	0	0	1	1	100	5	2	0.5	2.6	0	0	39.4	8.9	51.2	0.2	0.3	3.68	113	33.6	91.4	30.7	336	53.4	16.4	235	0.19	8.1	15.4	1	0	0	3	24.4444	10.8	0.91	119.5	25.9	2.32	15.9	0.97	3.5	96
155	2	70	7	0	4	1050	150	0	1	2	0	100	9.3	1.6	1.1	6.5	0	0	17.6	11.5	70.7	0	0.2	3.59	116	34.9	97.1	32.3	333	60	17.1	107	0.11	10.4	16.5	1	1	1	3	26.8352	10.6	0.89	124.1	22.5	3.47	15.4	1.87	7.2	93.5
127	1	62	3	1	3	360	120	0	1	1	0	100	6.2	1.8	0.4	4	0	0	29.2	6.1	64	0.6	0.1	4.15	133	40	96.4	32	333	55.1	15.7	212	0.2	9.3	16.2	0	1	0	3	21.2245	12.1	1.02	94.9	26.6	2.66	14.7	0.63	3.3	107
450	1	67	5	0	3	900	180	0	1	1	0	100	4.9	1.1	0.5	2.9	0.3	0	21.9	10.3	60.3	6.7	0.8	4.37	127	37.8	86.5	229	336	45	14.3	277	0.26	9.2	16.1	2	2	0	3	19.5717	10.876	0.9129	117.506	25.533	2.72569	16.443	0.6749	3.142	92.295
591	1	65	3	1	4	420	140	1	1	1	0	100	6.6	1.1	0.6	4.8	0.1	0	17	8.4	72.8	1.7	0.1	4.47	132	40.5	90.7	29.6	326	47.2	14.4	203	0.18	9.2	16.1	2	1	1	3	17.3745	10.4	0.86	131.5	23.8	3.39	15.6	0.72	3.2	108.7
342	2	68	5	1	3	825	165	1	1	1	1	100	2.5	1.3	0.3	0.8	0	0	53.6	12.2	32.9	0.9	0.4	2.6	99	30	115.5	37.9	330	64.4	15	85	0.1	11.4	17.3	0	1	0	3	24.8889	11	0.92	115.1	245.6	2.02	18.4	0.95	4.5	78.3
431	1	56	2	0	4	300	150	1	1	1	0	100	9.8	2.3	0.8	6.5	0.2	0	23.2	7.8	66.3	2.3	0.4	3.82	126	36.8	96.3	32.9	342	61.1	17.5	124	0.15	11.7	16.7	1	1	0	3	19.8962	10.2	0.85	133.3	24.2	3.37	16.9	1.23	4.3	95.3
288	1	64	7	0	3	1050	150	0	1	1	0	100	5.3	1.3	0.6	3.2	0.3	0	23.7	11	59.5	5.6	0.2	4.23	134	39.8	94	31.8	337	52.4	15.3	118	0.13	11.5	17.1	1	1	0	3	21.7776	11.3	0.95	109	25.7	3.07	16	0.67	3.7	87.1
114	1	61	5	0	2	1000	200	0	1	1	0	100	6.2	0.7	3.5	1.2	0.7	0	11.8	57.2	19.4	11	0.6	3.5	113	32.3	92.3	32.3	350	48.6	14.5	136	0.15	10.9	11.9	1	0	2	3	18.5132	11.8	1	99.8	24.5	2.36	14.8	0.32	1.6	91
519	1	58	3	1	4	600	200	1	1	1	1	100	4.1	1.1	0.5	2.4	0.1	0	26.5	11.8	58.8	2.5	0.4	4.32	118	36.5	84.5	27.2	323	106.4	35	128	0.14	10.7	15.4	2	0	1	3	23.3844	10.4	0.86	128.3	23.9	2.22	17.1	0.29	1.8	85.6
174	2	60	3	1	4	390	130	0	1	1	0	100	5.8	1.5	0.6	3.5	0.1	0	26	11.1	60.1	2.4	0.4	4.07	108	33.5	82.3	26.5	322	44.6	15	191	0.21	11.8	16.6	1	0	3	3	23.7332	10.6	0.88	126.5	25.4	4.63	14.5	0.3	2	84.1
360	1	57	3	0	4	450	150	0	1	1	0	100	6.3	1.7	0.9	3.5	0.2	0	27.1	13.6	55.6	3.3	0.4	3.99	132	39.8	99.8	33.2	332	69.5	19	95	0.1	10.9	16.4	1	1	1	3	22.8374	10.7	0.89	121.7	22.6	2.73	16.5	0.62	3	82.2
789	2	59	2	0	2	220	110	0	0	1	1	100	8.3	1.8	0.7	5.5	0.2	0.1	21.7	9	66.5	2.2	0.6	4.57	132	40.2	87.9	29	328	45.4	14.1	146	0.15	10.5	15.7	1	0	0	3	19.9792	10.8	0.9	119.2	26.1	3.22	15.5	0.36	1.8	94.7
58	1	62	1	0	2	200	200	0	1	1	0	100	4.3	3	1	0.3	0.1	0	68.7	23	6.7	1.1	0.5	3.07	108	32.4	105.6	35.3	334	56.6	14.6	84	0.12	14.1	17.2	1	0	0	3	21.1073	10.1	0.88	114.9	23.9	2.69	17.9	0.73	2.3	98.1
571	2	62	4	0	3	680	170	1	1	1	1	100	5.1	1.5	0.4	3.1	0.1	0	29.3	7.8	61.5	1.1	0.3	3.9	123	38.1	9777.8	31.7	323	51.6	14.3	114	0.12	10.9	16.2	1	1	0	3	19.4771	11.1	0.94	111	27.6	3.12	17.4	0.27	1.7	103
223	1	75	2	1	4	400	200	0	1	2	0	90	9	2.2	0.6	5.7	0.4	0.1	24.6	7	63.6	4.1	0.7	4.51	143	41.1	91.2	31.7	348	46.7	14.1	228	0.2	9.2	16	1	2	3	3	25.8166	10.8	0.91	119.5	25.5	3.07	15.1	0.93	3.7	79.6
713	1	47	1	0	4	140	140	0	0	1	0	100	3.2	1	0.4	1.6	0.1	0	32.6	12.7	48.8	4.5	1.4	4.36	132	39.5	90.6	30.3	334	37.6	11.4	319	0.27	8.3	15.7	1	1	0	2	22.4913	10.9	0.91	117.2	24.3	4.57	15.2	1.01	2.8	102.5
281	1	58	5	1	4	1045	209	0	1	1	1	100	3.3	0.9	0.6	1.9	0	0	25.5	16.9	56.4	0.9	0.3	3.82	126	37.9	99.1	33	332	58	16.1	100	0.1	9.7	16.7	1	0	1	3	18.5911	10.8	0.9	121.7	28.3	3.5	17.2	0.87	4.5	92.2
18	1	59	3	1	4	600	200	1	1	1	0	100	3.7	1.8	1.7	0.2	0.1	0	44.1	6.2	47.7	1.5	0.5	4.08	136	40.4	99.1	33.3	337	60.7	16.8	95	0.1	10.2	16.1	3	3	1	3	24.0238	11.3	0.98	101.9	28.8	2.06	16.5	0.99	4	90
128	1	62	4	1	3	480	120	0	1	1	0	100	7.5	2.1	0.5	4.9	0.1	0	27.6	64.6	64.6	0.7	0	4.29	141	41.4	96.4	32.8	341	52.7	15	241	0.22	9.1	16.2	0	1	0	3	21.2245	12.3	1.04	91.8	24.8	2.95	16.4	0.49	2.4	121.3
323	1	56	10	1	4	2400	240	0	1	1	1	95	6.9	1	0.8	5	0.1	0	15	11.3	72.7	0.8	0.2	3.13	99	29.9	95.5	31.7	331	63.1	17.9	81	0.09	10.7	16.5	3	2	1	3	21.7993	10.969	0.9162	115.153	26.815	4.3675	16.008	0.7415	3.357	90.599
256	1	67	1	0	4	200	200	0	1	1	0	100	2.6	1.3	0.4	0.8	0.1	0	49.4	14.7	31.1	4.1	0.7	4.21	92	29.9	71.1	21.8	308	48.9	19	216	0.2	9.2	15.2	1	1	1	3	23.8751	12.3	1.04	91.8	25.8	1.99	16.7	1.42	2.2	73.1
671	1	36	2	0	3	320	160	0	0	1	0	100	5.7	1.9	0.3	3.3	0.1	0	34	6	58.4	1.5	0.1	4.68	133	40.2	85.8	28.4	331	45	14.5	205	0.18	10.2	16.2	1	2	2	3	28.4005	10.8	0.91	119.5	25	3.15	15.2	0.33	1.8	90.2
471	1	73	3	1	2	600	200	1	1	2	0	100	3.7	1.1	0.4	2.1	0	0	30.1	11.5	57.3	0.8	0.3	3.69	95	29.7	80.6	25.7	320	76.1	261	161	0.16	10.1	15.9	1	0	0	3	24.5351	11.5	0.97	103.7	22.7	2.2	17.2	1.04	3.8	81.7
619	2	54	8	1	4	960	120	0	0	1	0	100	6.8	4.2	2	0.6	0.1	0	61	28.7	8.3	1.6	0.4	4.11	112	35.3	85.9	27.3	318	56.3	17.9	256	0.27	10.6	16	1	1	1	3	24.974	10.1	0.87	114.9	24.5	3.29	17.2	0.91	3.8	97.6
469	1	37	3	0	2	600	200	0	1	1	1	100	5.6	1.9	0.5	3.2	0.1	0	32.9	8.4	56.6	1.6	0.5	4.53	145	43.2	95.4	32	336	54	15.6	210	0.2	9.6	16.1	1	0	0	2	22.7244	10.2	0.85	130.8	21.7	1.88	17.6	0.41	2.5	95.7
798	2	43	1	0	3	200	200	0	0	1	1	100	5.1	1.5	1.4	2.9	0.3	0	28.5	8.2	56.8	6.2	0.3	4.477	95	31.2	69.8	21.3	304	49.9	20.8	347	0.35	10.2	15.6	2	2	0	2	24.0346	11.2	0.94	111	22.6	2.69	14.5	0.54	2.6	105
191	1	54	1	1	4	220	220	0	1	1	1	100	5.4	1.7	0.4	2.9	0.4	0	31.1	7.5	53.8	7.4	0.2	4.07	130	39.4	96.9	31.9	330	46.5	13.2	247	0.24	9.7	16.3	2	2	1	2	20.2449	11.2	0.94	111	28.6	2.48	16	0.39	2.2	93.2
116	1	60	3	0	2	600	200	0	1	1	0	100	4.3	0.8	0.4	2.8	0.2	0	19	9.6	65.7	5.1	0.6	3.58	106	32.4	90.4	29.5	327	74.4	23	89	0.07	7.9	15.8	1	0	2	3	18.5132	11.8	1.03	95.4	24.4	2.54	15.6	0.59	2.4	96.4
743	1	60	5	0	4	600	120	0	0	1	1	100	5.7	1.4	0.4	3.8	0	0	24.1	7.6	67.2	0.7	0.4	4.34	136	40.6	93.6	31.4	335	42.6	12.6	145	0.17	11.5	16.8	2	2	1	4	18.9164	11.1	0.93	113	27.2	2.59	16	0.37	2.2	96.7
181	1	60	7	1	2	1400	200	0	1	1	0	100	3.8	1.5	0.3	1.9	0.1	0	39.6	7.1	49.1	3.8	0.4	4.06	95	31.1	76.7	23.4	305	61.5	22	140	0.15	10.5	16	1	0	0	3	21.9713	10.6	0.88	126.5	25.6	2.61	16.1	1.87	6.6	85.8
302	1	60	8	1	2	1600	200	0	1	1	0	100	3.4	1.4	0.3	1.6	0.1	0	41.4	8.2	47.5	2.7	0.2	3.8	92	29.1	76.7	24.1	316	65	23.5	91	0.09	9.3	15.6	1	0	0	3	22.6474	10.1	0.84	136.8	24.9	1.88	17.7	1.43	6	88.6
639	1	48	5	1	3	850	170	0	0	1	0	80	4.7	0.3	2.8	1.5	0.1	0	6.2	59.2	32.8	1.2	0.6	4.72	136	42.2	89.4	28.9	322	50.9	15.7	138	0.14	10.3	16.4	2	2	2	1	27.4587	10.5	0.88	126.5	23.9	3.47	17.1	0.33	2	106.2
775	2	49	1	0	2	150	150	0	0	1	1	100	6.3	1.6	0.1	4.3	0.1	0	25.7	5.5	67.3	1.2	0.2	4.05	125	37.2	91.9	30.9	336	46.9	14.2	227	0.22	9.6	15.8	1	0	3	3	22.6562	10.5	0.88	123.7	25.8	2.92	17	1.71	6.4	93.1
611	1	63	1	1	2	140	140	0	0	1	0	100	3.3	1.4	1.5	0.4	0.1	0	42.1	44.4	11.5	1.7	0.3	3.21	106	31.6	98.4	32.9	334	49.3	13.4	121	0.14	11.2	16.3	2	0	0	3	20.898	12.3	1.07	88.5	26.8	2.57	18.5	1.23	3.4	73.2
580	2	69	7	0	3	1050	150	1	1	1	1	100	4.2	1.5	0.4	2.3	0	0	35.4	9.6	54	0.5	0.5	3.87	121	37.3	96.3	31.3	324	54.2	15.4	148	0.14	9.7	16	2	1	0	3	17.5781	10.8	0.91	119.5	28.1	2.7	18.3	0.52	3.1	86.5
796	1	60	3	0	4	540	180	0	0	1	1	100	3.7	0.6	0.6	2.4	0.1	0	16.9	15.3	64.7	2.6	0.5	4.42	130	39.6	89.7	29.3	328	51.4	15.7	219	0.2	9.1	15.5	2	2	1	2	23.3887	10.2	0.85	134.1	27.1	3.72	15.3	0.4	2.2	91.8
518	1	58	4	1	4	800	200	1	1	1	1	100	4.9	1.6	0.6	2.4	0.2	0	33.4	12.3	50.1	3.8	0.4	4.38	126	39.4	89.9	28.7	320	101.6	31.1	194	0.2	10.3	15.7	2	0	1	3	23.3844	10.9	0.91	117.1	23.6	2.25	16.4	0.38	2	89.6
815	2	64	2	1	4	340	170	1	0	1	0	100	4.3	3	1	0.4	0	0	68.9	22.1	8.1	0.6	0.3	3.87	127	36.5	94.3	32.8	348	67.4	19.4	132	0.12	8.9	16	2	2	1	3	23.74	10.8	0.94	107	22.8	3.37	19	1.5	5.1	93.9
46	2	46	2	0	3	360	180	0	1	1	0	100	4.4	1.9	1.9	0.5	0.1	0	42.5	42.3	11.7	2.9	0.6	3.61	116	33.4	92.6	32.1	347	64.3	18.9	136	0.12	8.6	16.4	1	1	0	3	23.1473	10.9	0.95	105.9	24.1	2.74	17.6	0.18	0.6	94
754	2	73	2	1	3	200	100	0	0	2	1	100	3.2	1.5	0.2	1.4	0.1	0	46.8	5.4	43.6	4.2	0	3.34	99	29.9	89.4	29.7	331	64.4	19.9	122	0.11	8.7	15.9	1	2	0	3	29.2969	10.856	0.9139	117.352	24.851	2.5115	16.384	0.6949	3.142	89.133
158	1	61	5	1	3	1000	200	1	1	1	0	100	4.8	0.6	3.2	0.9	0.1	0	12.2	67.1	18.7	1.1	0.9	4.3	145	43.3	100.8	33.7	335	58.3	15.9	199	0.23	11.7	16.5	0	1	0	3	21.6296	9.8	0.81	148.4	24.6	2.33	17.8	0.36	1.6	100.9
626	1	47	2	1	3	340	170	0	0	1	0	90	4.7	0.4	2.7	1.4	0.2	0	8.9	56.6	29.1	4.8	0.6	4.21	103	32.2	76.5	24.6	320	52.8	18.9	139	0.11	8.2	15.7	2	2	2	1	27.4587	11	0.92	115.1	26.7	3.43	14.3	1.63	4.9	93
172	2	60	5	1	4	650	130	0	1	1	0	100	5.6	1.4	0.5	3.6	0.1	0	24.6	9.7	63.9	1.6	0.2	3.99	101	32.3	80.9	25.4	313	48.7	16.6	215	0.23	10.6	16.2	1	0	3	3	23.7332	10.7	0.9	121.7	26	6.51	14.8	0.34	2.6	72.3
17	1	75	1	1	3	150	150	1	1	4	0	100	6.3	4.8	0.9	0.4	0.1	0.1	14.1	6.9	76.9	1.1	1	4.09	112	34.9	85.4	27.5	321	44.8	14.4	311	0.27	8.7	15.6	1	1	0	3	21.4692	11.1	0.96	103.9	29.3	3.35	13.8	0.75915	3.197	89.244
512	2	72	6	1	3	900	150	0	1	2	0	100	4.2	1.4	0.4	2.3	0.1	0	33.8	0.3	55.1	2.4	0.4	3.29	95	30.6	93.1	28.8	310	73.2	22	208	0.21	10.1	15.8	2	1	0	2	26.6389	10.4	0.87	128.9	23.9	2.59	15	1.05	4	87
49	1	57	3	1	3	420	140	1	1	1	0	100	4.4	2.3	1.4	0.6	0.1	0	51.8	32.2	12.9	2.2	0.9	3.3	104	31.3	95	31.5	331	57.1	16.4	124	0.14	10.4	16.6	1	1	0	3	22.6474	10.5	0.91	110.2	24.8	3.49	17.1	0.14	1.1	107.8
804	1	70	1	1	3	200	200	0	0	2	1	95	5.1	4	0.4	0.4	0.2	0	79.6	8	7.4	4.5	0.5	2.55	81	23.9	93.7	31.9	339	71.1	19.1	137	0.13	9.1	15.9	0	1	0	3	20.3074	11.6	0.97	103.7	26.8	5	13.3	0.61	2.8	94.1
516	2	71	2	0	3	280	140	0	1	4	1	100	3.8	1.2	0.2	2.3	0.1	0	31.1	5.9	60.1	2.3	0.6	4.05	127	39.2	96.9	31.5	324	52.2	14.9	197	0.18	8.9	15.5	1	1	0	3	19.7777	10.4	0.86	128.3	21.5	2.39	16.1	0.744	3.279	98.933
581	2	69	6	0	3	900	150	1	1	1	1	100	4.1	1.4	0.6	2.2	0.1	0	32.8	13.3	52.2	1.3	0.4	3.85	121	37.5	97.4	31.5	323	56.5	15.7	200	0.2	9.8	16	2	1	0	3	17.5781	11	0.92	115.1	27.8	2.91	16.5	0.65	3.9	86.3
481	1	19	3	0	3	300	100	1	1	1	1	100	3.1	1.2	0.3	1.6	0	0	39.6	8.4	50.5	1.3	0.2	4.81	150	45.3	94.1	31.1	331	59.4	17.5	176	0.18	10.4	16.1	1	1	0	1	17.3589	11.6	0.98	102	28	1.61	17.45	0.16	1.7	92.2
284	1	61	4	0	3	800	200	1	1	1	0	100	3.5	1	0.4	2.1	0	0	28	12.3	58.4	1.1	0.2	3.86	134	39.9	103.4	34.6	336	52.6	14	126	0.12	9.8	16.3	0	1	0	2	23.4236	11.6	0.98	103.3	25.9	2.26	17.3	0.31	3	76.1
555	2	67	3	1	3	360	120	0	1	1	0	100	11.2	1.6	1.2	8.4	0	0	13.9	10.7	75	0.2	0.2	3.04	89	27.5	90.3	29.1	324	43.8	13.2	262	0.25	9.5	16.1	0	1	0	4	22.3133	12.9	1.1	83.3	24.5	6.07	16.6	1.73	5.4	67
226	2	68	6	1	3	1080	180	0	1	1	0	100	3.2	1.5	0.4	1.3	0.1	0	44.6	11.8	41.7	1.4	0.5	3.35	95	29.7	88.8	28.3	320	90.7	28.5	189	0.15	8.2	16	1	1	0	3	19.9481	10.878	0.9134	117.581	24.996	2.5386	16.844	0.5874	2.901	88.031
27	2	63	4	0	2	720	180	1	1	1	0	100	3.6	1.4	1.7	0.3	0.1	0	40.3	48.3	8.1	2.9	0.4	3.56	119	35.7	100.5	33.5	334	59.2	16	113	0.14	11.5	16.7	1	0	0	2	18.6709	11.5	1	100	25.5	2.12	18.6	0.89	3.2	98.7
654	1	67	3	0	3	540	180	0	0	1	0	100	5	1.1	0.7	3.2	0.1	0	21.3	13.3	63.1	2.2	0.1	4.77	152	46.3	97.1	31.9	328	46.5	13.1	146	0.14	9.2	16	2	2	0	3	19.9481	10.869	0.9139	117.525	25.046	3.1806	16.445	0.6936	3.153	93.433
438	1	68	7	1	4	910	130	0	1	1	0	100	7.6	1.5	0.6	5.3	0.1	0.1	19.6	8.2	69.5	1.8	0.9	4.01	124	38.8	96.7	31	320	50.3	14.4	271	0.35	14.7	16	2	2	1	4	22.6562	10.4	0.9	111.4	26	2.24	17.9	0.51	3.5	81.2
365	1	61	3	0	3	570	190	0	1	1	0	100	3.8	1	0.5	2.2	0.1	0	25.6	11.9	59.3	2.8	0.4	3.8	127	38.2	100.6	33.4	332	56.3	15.4	181	0.17	9.2	16.2	1	1	0	4	25.3515	10.5	0.88	126.5	24.5	2.54	17.3	0.88	3.1	81.3
230	1	53	2	0	2	400	200	0	1	1	1	100	4.2	1.5	0.4	2.2	0.2	0	35.7	9.1	51.3	3.5	0.4	4.93	143	43.2	87.6	29.1	331	49.2	15.8	87	0.13	14.4	16	1	0	0	2	22.3094	10.7	0.89	124.1	23.6	1.82	17.5	0.66	3.2	92.8
38	1	67	1	0	3	150	150	0	1	1	0	100	3.1	2.1	0.5	0.4	0	0	69.6	17.5	11.8	0.9	0.2	3.78	103	31.2	82.7	27.4	331	50.5	16.3	189	0.15	8	15.7	0	2	0	2	19.3772	12.3	1.07	88.5	25.5	2.84	16.9	0.42	2.3	71
799	2	71	1	0	4	150	150	0	0	2	0	100	3.2	1.1	0.3	1.8	0.1	0	33.1	9.6	55	1.9	0.4	3.92	84	27.8	70.9	21.5	302	772.9	30.5	186	0.15	8.1	15.1	1	1	1	3	22.151	11.8	0.99	100.3	26.2	2.32	15.7	1.99	6.7	73.6
375	1	58	4	0	4	600	150	0	1	1	1	100	3.9	1.3	0.3	2.1	0.1	0	34	8.7	55	2.2	0.1	4.37	158	46.6	106.6	36.1	339	52.5	13.6	124	0.15	11.7	16.8	1	1	0	3	26.0262	10.878	0.9138	117.724	25.354	3.1589	16.893	0.7462	3.163	90.342
470	1	58	5	0	4	750	150	0	1	1	1	100	3.2	1	0.3	1.8	0.1	0	31.7	8.8	54.8	4.4	0.3	4.17	147	44.2	105.9	35.2	333	72.7	18.6	239	0.21	8.7	16.1	1	1	0	3	24.6914	10.3	0.85	130.8	32.5	4.44	17.7	0.32	2	83.7
801	1	40	3	0	3	450	150	0	0	1	0	100	13.5	1.5	0.9	11.1	0.1	0	10.7	6.6	82.3	0.4	0	4.87	154	45.6	93.77	31.6	338	48.77	14.3	189	0.18	9.7	16	1	1	0	3	24.9135	11	0.92	115.1	23.5	2.46	16.4	0.24	1.8	139.7
707	2	63	4	1	2	480	120	0	0	1	1	100	4	1.3	0.3	2.4	0.1	0	33.2	6.7	58.5	1.2	0.4	3.8	123	36.8	96.9	32.5	334	45.3	12.7	223	0.19	8.3	15.5	1	0	0	3	22.806	11	0.92	117.2	28.7	2.81	16.1	0.86	3.6	79.3
631	1	67	2	1	3	240	120	0	0	1	1	100	6	0.5	3.3	1.7	0.5	0	8.7	54.3	28.4	8	0.6	4.39	105	32.9	74.9	23.8	319	64.9	24.6	140	0.13	9.5	15.3	2	0	0	3	19.3792	10.2	0.85	134.1	26.3	4.28	14.9	0.36	2.6	101.9
195	2	72	3	1	4	585	195	0	1	2	1	90	6.5	1.6	0.4	4.4	0.2	0	24.2	5.4	67.6	2.4	0.4	3.69	120	35.9	97.2	32.7	334	63.6	18.1	212	0.2	9.3	16.4	3	3	1	2	26.4792	10	0.83	139.6	25.6	3.79	15.1	1.42	5.6	110.4
709	1	54	10	1	4	1500	150	0	0	1	0	100	3.9	0.7	0.5	2.6	0.1	0	18.7	13.4	66.1	1.5	0.3	4.27	138	41.8	98	32.4	330	48.3	13.6	151	0.13	8.5	16	1	2	1	3	24.093	10.868	0.9134	117.54	25.169	3.2438	16.846	0.7022	3.295	87.314
718	1	51	1	1	3	140	140	0	0	1	0	100	9.1	2.2	0.5	6.1	0.3	0	24.2	67	5.6	3	0.2	4.82	139	40.4	83.8	28.8	344	47.2	15.4	117	0.13	10.7	16.1	2	1	0	2	27.4506	11.5	1	100	27.9	2.91	19.3	0.82	2.6	91.2
504	1	67	7	1	3	840	120	0	1	1	1	100	8.2	0.5	0.5	7	0.2	0	6	6.1	85.4	2.3	0.2	3.66	103	31.5	86.1	28.2	327	47.1	15.1	69	0.07	9.4	16.8	2	0	0	3	19.3792	10.9	0.92	115	24.8	3.41	16.1	1.13	3.8	92.2
803	1	62	2	0	4	240	120	0	0	1	1	100	10	1.4	0.7	7.8	0.1	0	13.7	7.2	78	0.7	0.4	3.85	115	35	90.9	30	329	56.5	17.1	262	0.22	8.3	15.6	3	3	3	1	17.9592	11.2	0.94	109.1	24.5	3.67	14.7	5.04	17	76.9
693	1	60	4	1	4	500	125	0	0	1	0	100	3.9	1.1	0.3	2	0.4	0	28.9	7.5	52	10.7	0.9	3.58	101	31.3	87.3	28.3	323	42.9	13.7	142	0.12	8.6	15.8	2	2	1	1	27.5482	10.9	0.91	117.2	24.8	2.54	16.7	1.1	4.9	89
802	1	75	1	0	4	170	170	0	0	1	0	100	6.9	1.6	0.7	4.5	0.1	0	22.6	10.2	65.3	1.3	0.6	4.92	150	44.3	90.1	30.5	339	54.3	16.8	130	0.13	9.8	16.4	1	1	3	2	26.6436	11.1	0.93	113	25.8	2.19	16.6	0.17	1.5	81.1
163	2	42	1	0	3	190	190	0	1	1	0	100	4.5	1.4	0.4	2.5	0.1	0	31.5	9.8	55.8	2.2	0.7	3.24	91	28.6	88.4	28.2	318	61.8	19.5	183	0.14	8.1	15.1	1	1	0	2	19.9481	10.7	0.9	121.7	23	1.7	16.8	1.84	7.1	95.5
719	1	66	5	0	2	650	130	0	0	1	1	100	2.1	0.9	0.3	0.8	0.1	0	44.1	12.1	38.5	3.6	1.7	4.1	112	34.9	85.2	27.3	321	53.9	17.4	148	0.14	9.3	15.9	2	2	0	2	24.3046	11.7	0.99	100.3	23.9	2.55	17	1.41	5.5	85.4
153	1	65	3	1	4	450	150	1	1	1	1	100	7.8	1	4.9	1.7	0.1	0	13	62.6	22.3	1.8	0.3	4.42	113	36.3	82.2	25.6	311	74.7	25.1	178	0.15	8.2	15.2	2	2	3	3	22.6852	11	0.92	115.1	27	2.65	16.4	0.43	2.6	72.1
576	1	34	7	0	4	1365	195	0	1	4	1	100	5.3	1.6	0.5	2.9	0.3	0	30.3	8.8	55.3	5.3	0.3	4.72	139	42	88.9	29.5	331	100.2	31.3	285	0.15	7.9	15.8	3	3	1	3	16.7062	10.6	0.89	124.1	23.9	3.82	15	1.18	4.6	103
592	1	57	3	1	2	600	200	1	0	1	0	90	4.4	2.5	1.5	0.3	0.1	0	57	34.8	6.3	1.1	0.8	3.89	129	38.7	99.7	33.3	334	62.5	16.9	118	0.13	11.1	16.9	0	0	0	3	25.5102	11.1	0.96	103.9	26.8	4.02	16.2	0.21	1.1	115
635	2	63	1	1	2	120	120	0	0	1	1	100	4.3	1.2	0.4	2.7	0	0	27.9	8.8	62.2	0.9	0.2	3.75	108	33.6	89.5	28.7	321	43.5	13.6	233	0.18	7.9	15.4	1	0	0	3	23.2446	11.5	0.96	107.1	27.9	3.32	14.5	1.24	4	88.3
112	2	75	5	1	4	750	150	1	1	2	1	100	2.7	0.2	1.3	1	0.2	0	7.6	48.6	37.7	5.8	0.3	3.93	126	37.8	96.2	32.1	333	58	16.9	76	0.07	8.9	16.2	1	1	1	3	16.8242	10.8	0.9	121.7	27.3	2.9	15	0.37	2	97.3
227	1	67	6	0	4	1200	200	0	1	1	0	100	4.3	2.4	0.3	1.5	0.1	0	55.4	7.4	34.3	2.6	0.3	3.58	134	40.2	112.3	37.4	333	59.1	14.3	101	0.09	9.1	16	1	2	1	2	20.3816	10.875	0.9134	117.735	25.3544	2.70408	16.793	0.6646	3.119	88.624
582	2	69	5	0	3	750	150	1	1	1	1	100	4.3	1.6	0.6	2.1	0.1	0	36.5	13.5	47.9	1.4	0.7	3.62	117	36.2	100	32.3	323	60.1	16.5	246	0.25	10.3	16.4	2	1	0	3	17.5781	11.1	0.93	113	29.3	2.75	17.9	0.76	3.1	83.1
104	2	58	2	0	3	400	200	1	1	1	1	100	2.5	0.3	1.1	1	0.1	0	12.2	43.2	41.5	2.3	0.8	3.7	110	33.6	90.7	29.8	327	66.6	20.8	152	0.14	9.3	15.9	2	1	3	3	20.7031	10.8	0.93	107	24.9	2.25	14.5	8	19.7	105.4
422	1	69	7	0	4	1400	200	1	1	1	0	100	6.6	1.8	0.5	4.1	0.2	0	27.8	7.1	62.1	2.7	0.3	4.59	117	36.3	79.1	25.5	322	50	17	114	0.13	11.8	15.8	1	1	1	3	20.5151	12.9	1.13	81.2	28.3	4.02	15.8	0.47	2.2	74.6
420	1	88	6	0	4	600	100	0	1	2	1	90	5.7	1.1	0.6	3.8	0.1	0	20	10.7	66.6	2.4	0.3	3.02	86	27.5	90.9	28.6	313	49.2	14.8	192	0.16	8.1	15.6	1	1	1	3	17.5697	12.8	1.08	85.6	26.6	5.84	15.6	1.99	6.9	70.7
120	2	55	5	1	4	900	180	1	1	1	0	100	4.6	1.6	0.5	2.3	0.2	0	34.9	9.9	51.2	3.8	0.2	3.85	126	39.2	101.9	32.8	321	54.7	14.7	192	0.18	9.7	16	3	3	1	3	21.2306	10.1	0.84	136.8	23.9	2.79	16	0.3	2.2	88.7
54	1	63	3	1	3	600	200	1	1	1	0	100	4.2	2.3	1.5	0.3	0.1	0	55	34.6	7	2.9	0.5	4.42	127	38.3	86.6	28.8	332	46.4	14.7	219	0.23	10	16.3	1	1	0	3	25.0399	10.3	0.89	112.5	26.3	2.16	16.2	0.18	1.2	87.2
152	1	57	2	0	3	460	230	0	1	1	1	100	6.2	0.4	4.1	1.6	0.1	0	6.1	66.2	25.7	1.6	0.4	3.74	106	32.6	87.1	28.5	325	46.6	14.8	172	0.17	9.6	16	1	1	0	3	23.8367	11	0.92	115.1	27.6	4.26	16.6	1.29	5.4	102.2
404	1	47	7	1	3	980	140	0	1	1	1	100	4	1	0.4	2.5	0.1	0	26.1	9	63.2	1.2	0.5	3.98	115	34.7	87.3	28.9	331	57.3	18	103	0.1	10	16.1	0	2	0	2	20.7612	10.1	0.84	136.8	24.7	3.26	16.9	1.35	5.6	108.7
782	2	54	1	0	3	180	180	0	0	1	0	100	4.2	1.1	0.3	3.3	0.1	0	23.8	5.3	69.8	1	0.1	3.98	120	35.5	89.1	30.1	338	55.6	1777.4	186	0.23	12.2	16.9	0	1	0	4	21.3599	12.4	1.06	89.6	24.5	3.26	15.1	0.18	1.8	101.3
208	2	56	3	0	3	540	180	1	1	1	1	100	5.5	2.2	0.4	2.7	0.1	0	40.8	8.1	49.3	1.4	0.4	3.48	123	35	100.6	35.2	351	73.9	20.2	147	0.16	10.9	16.5	0	1	0	3	25.5983	11	0.92	115.1	24.8	2.52	15.6	0.63	3.1	86.2
741	1	60	1	0	4	120	120	0	0	1	1	100	3.5	1.4	0.3	1.7	0.1	0	39.1	9.9	48.7	1.8	0.5	3.94	120	36.4	92.4	30.4	330	43.2	12.9	209	0.21	10.7	16.3	2	2	1	4	19.052	11.5	0.96	107.1	27.7	2.08	14.7	0.98	3.3	98.4
641	1	37	1	0	4	120	120	0	0	1	0	100	3.1	0.4	1.6	0.9	0.2	0	12.6	52.5	27.8	5.7	1.4	4.33	140	41.4	95.7	32.3	338	47.8	13.8	115	0.11	9.4	16	3	3	1	3	21.1463	10.5	0.88	126.5	25.4	2.97	16.1	0.6	2.8	117.3
9	2	61	3	1	2	600	200	0	1	1	0	100	3.7	1.3	1.8	0.5	0.1	0	35.2	48.4	13.5	2.3	0.6	3.25	112	32	98.5	34.5	350	67.1	19.1	125	0.12	9.5	16.3	2	0	0	3	22.5827	10.4	0.9	111.4	25.3	2.91	18	0.3	1.9	109.2
717	1	51	2	1	3	280	140	0	0	1	0	100	9.8	1.9	0.6	7.2	0.3	0	18.8	5.6	72.9	2.5	0.2	4.84	141	41.7	86.1	29.1	338	52.2	16.6	113	0.12	10.5	16.2	2	1	0	3	27.4506	11.7	1.02	96.9	27.5	3.17	14.1	0.79	3.5	92.4
37	1	55	1	0	3	165	165	0	1	1	0	90	5	2.3	2	0.4	0.2	0	46.9	39.2	8.7	4.8	0.4	4.41	123	36.7	83.2	27.8	334	64.9	21.4	129	0.12	9.6	15.8	2	1	0	3	22.4913	10.6	0.92	109.1	26.3	3.23	16.2	0.62	2.2	86.4
453	1	77	2	0	3	360	180	0	1	2	0	100	3.2	1	0.4	1.7	0.1	0	30.6	13.7	53.1	1.6	1	4.33	124	37.1	85.6	28.6	334	57.7	18.9	121	0.11	9.1	15.9	1	1	0	3	28.0404	11.1	0.93	113	23.5	3.53	15	1.39	5.1	81.9
254	2	69	8	0	3	1200	150	1	1	1	1	100	3.8	1.1	0.4	2.3	0.1	0	28.1	9.7	60.4	1.2	0.6	3.72	116	36.2	97.4	31.3	320	54.7	15.3	128	0.13	9.8	16	2	1	0	3	17.5781	11.1	0.93	115.1	27.6	2.92	18	0.44	2.5	86.3
304	1	46	6	1	4	900	150	0	1	1	0	90	7.3	0.8	0.4	5.9	0.1	0	11.6	5.9	80.9	1.3	0.3	3.71	128	38.7	104.2	34.6	331	55.9	14.8	88	0.08	9.3	16.3	1	1	1	3	19.4674	11.4	0.96	107.1	27	4.58	15.3	0.47	2.8	106.1
627	1	55	2	0	4	400	200	0	0	1	0	100	4.6	0.4	2.3	1.8	0.1	0	9.1	49.3	40	1.1	0.5	4.25	115	36.8	86.5	27	313	45.8	14.6	178	0.15	9.5	16	1	2	3	3	24.1633	10.2	0.85	134.1	25.8	3.29	16.3	0.36	2.6	88.4
572	1	70	4	1	2	600	150	1	1	2	0	100	4.9	1.4	0.4	3	0.1	0	29.1	8	61.4	1.3	0.2	4.59	146	43.8	95.5	31.8	333	51.1	14.7	170	0.16	9.6	16	1	0	0	2	22.8571	10.5	0.87	126	25.9	3.09	17.4	0.46	2.3	79.7
599	1	57	1	1	3	140	140	0	0	1	0	90	6.5	4.4	1.6	0.4	0.1	0	67.6	24.7	6.5	0.8	0.4	3.2	102	29.1	90.9	31.9	351	58	17.3	150	0.14	9.2	16.4	1	1	0	3	22.3094	10.7	0.93	108	24.2	4.61	15.9	0.22	1.1	109.9
607	1	47	1	0	3	120	120	0	0	1	0	100	5.3	3.4	1.4	0.4	0.1	0	63.9	26.8	6.9	2.2	0.2	4.9	154	45.1	92.2	31.5	341	45.8	13.4	251	0.22	8.8	15.7	1	1	0	3	22.7204	10.7	0.93	108	26.7	4.21	16.6	0.31	1.1	86.6
263	2	72	1	1	3	180	180	1	1	2	0	100	4.9	1.1	0.3	3.5	0.1	0	139	42.1	4.52	93.1	30.8	4.52	139	42.1	93.1	30.8	330	54.2	16.1	155	0.14	9	15.9	1	2	0	3	27.8852	11.4	0.95	109	27.5	3.05	17.1	0.98	4.9	90.2
298	1	56	7	0	4	1050	150	0	1	1	0	100	5.6	1.4	0.3	3.8	0.1	0	24.4	4.9	68.1	2.1	0.5	4.66	143	43.2	92.7	30.6	331	52.5	15.6	246	0.24	9.7	15.9	2	1	1	3	26.2346	10.5	0.87	128.9	26.8	3.58	16.6	0.77	3.8	100.1
415	1	72	3	0	4	450	150	1	1	2	0	95	3.3	0.9	0.3	1.9	0.2	0	26.4	7.8	58.2	6.7	0.9	3.66	109	33	90.1	29.8	330	73.9	23.1	150	0.14	9.2	16.2	3	3	1	2	24.4261	12	1.01	96.5	21.9	1.95	15.5	2.07	6.9	88
151	1	79	3	1	3	450	150	0	1	2	0	100	7.3	2.2	0.7	4.2	0.1	0	30.5	9.5	57.8	1.7	0.5	4.04	126	37	91.7	31.1	341	75.5	23.1	201	0.19	9.4	16.2	2	2	0	2	24.9135	10.4	0.96	107.8	25.3	2.57	15.9	1.13	4.1	92.3
660	1	53	3	1	4	450	150	0	0	1	0	100	3.8	1.3	0.5	1.9	0.1	0	33.8	13.8	50.2	1.9	0.3	3.41	113	34.7	101.7	33	326	83.9	21.5	165	0.16	9.4	16.1	1	2	1	3	24.093	10.6	0.88	126.5	24.5	2.56	17	0.77	3.4	85
737	1	47	2	1	3	280	140	0	0	1	1	100	4	1.2	0.2	2.5	0.1	0	30.2	5.1	63.1	1.2	0.4	4.19	106	32.8	78.2	25.4	323	47.9	17.1	177	0.16	10	16	0	2	0	2	20.7612	11	0.92	117.2	23.9	2.79	14.2	0.63	3.2	113.1
551	1	58	5	0	4	750	150	0	1	1	1	100	4.7	1.1	0.4	3	0.2	0	23.5	7.8	63.8	4.6	0.3	4.26	153	44.8	105.1	36	342	51.9	13.6	121	0.13	11	16.5	1	1	1	3	26.0262	10.868	0.9132	139.235	26.237	3.2163	16.659	0.6496	3.122	85.2194
489	2	62	3	0	3	510	170	1	1	1	1	100	5.4	1.3	0.4	3.7	0.1	0	23.8	7	67.7	1.2	0.3	3.89	123	3888.3	98.4	31.5	321	51.2	14.2	143	0.15	10.5	15.9	1	1	0	3	20.2913	11.1	0.93	113	25.9	3.61	16	0.9	3.5	99.7
148	1	79	6	1	3	900	150	0	1	2	0	100	6.2	2	0.7	3.3	0.1	0.1	32.9	10.6	54.1	1.6	0.8	3.51	124	37	105.4	35.4	335	81.9	21.3	198	0.19	10.1	16.6	2	2	0	2	24.9135	10.4	0.96	107.8	24.9	2.36	16.1	0.95	3.9	87.2
147	1	79	7	1	3	1050	150	0	1	2	0	100	5.9	1.7	0.6	3.4	0.1	0	29.2	10.6	58.1	1.5	0.6	3.54	324	37.2	105.1	35	333	77.3	20.3	206	0.18	10.2	16.6	2	2	0	2	24.9135	11.1	0.93	113	26.4	3.01	15.5	0.9	3.5	84.4
697	1	60	4	0	4	480	120	0	0	1	1	100	3.9	1.1	0.3	2	0.4	0	28.9	7.5	52	10.7	0.9	3.58	101	31.3	87.3	28.3	323	42.9	13.7	142	0.12	8.6	15.8	2	2	1	4	18.9164	10.9	0.91	117.2	24.8	2.54	16.7	1.1	4.9	89
771	1	60	2	0	4	360	180	0	0	1	1	100	3.1	0.7	0.4	1.8	0.2	0	22.1	13.9	57.3	6.5	0.2	4.36	1234	38.2	87.5	28.4	325	48.4	15.2	212	0.19	8.8	15.7	2	2	1	2	22.7204	11	0.92	115.1	27.9	3.12	14.7	0.41	2.4	88.3
622	1	56	2	0	4	400	200	0	0	1	0	90	4.2	2	1.7	0.3	0.1	0.1	40.7	8.1	47.9	2	1.3	4.46	142	42.6	95.6	31.9	333	62.8	18.3	203	0.23	11.2	16.2	0	0	1	3	20.4082	9.1	0.78	128.5	23.1	2.99	16.2	2.46	7.5	103.6
349	1	70	3	1	2	450	150	1	1	2	0	100	4.6	1.5	0.4	2.7	0	0	31.7	9	58.5	0.6	0.2	4.25	136	41.2	96.9	31.9	330	52.8	13.9	178	0.18	9.8	16	1	0	0	2	22.8571	10.5	0.87	126	25.1	3.02	15.9	0.42	2.5	80.7
464	2	76	5	0	4	500	100	0	1	2	1	100	7.6	2.1	0.7	4.4	0.3	0.1	28.1	9.8	57.8	3.4	0.9	3.82	122	37.7	98.7	31.9	324	50	13.9	161	0.16	9.9	16.1	3	3	1	2	24.864	10.8	9	119.5	24.4	2.59	17.6	0.56	2.7	89
326	1	56	7	1	4	1680	240	0	1	1	1	95	6.1	1.4	0.7	3.8	0.1	0	23.3	12.2	63.2	1.1	0.2	3.48	108	33.2	95.3	31	325	60.8	17.5	79	0.08	9.7	16.2	3	2	1	3	21.7993	10.97	0.9163	115.249	25.587	4.0284	16.457	0.74075	3.306	92.2837
187	1	72	3	0	4	360	120	1	1	2	1	100	4.8	1.1	0.5	3.1	0.1	0	22.7	10.5	63.8	2.5	0.5	4.15	134	41.2	99.2	32.4	325	49.5	13.7	104	0.1	9.6	16.3	1	1	1	2	19.8177	12.3	1.04	93.3	28.2	2.9	17.6	1.53	6.2	61.8
124	2	69	6	0	3	1200	200	1	1	1	0	100	3.2	0.4	1.5	1.2	0.1	0	11.2	46.6	37.6	4.4	0.2	3.12	102	30.7	98.3	32.8	332	48.8	13.5	107	0.13	11.2	17	1	1	0	3	19.487	10.2	0.85	134.1	22.5	2.86	16	3.35	10.8	109
708	1	58	6	1	3	1200	200	0	0	1	1	100	3.1	1.1	0.4	1.5	0	0	36.3	14.1	48.2	1.3	0.1	3.46	118	34.6	99.9	34	341	69.2	19.7	219	0.18	8.1	16.6	1	1	0	3	23.1206	10.5	0.87	128.9	26.5	3.19	16.5	0.47	2.7	85.5
144	2	61	8	1	4	1200	150	1	1	1	1	100	5.8	0.2	3.8	1.5	0.3	0	4.1	65.8	25.3	4.3	0.5	4.33	126	38.4	88.6	29.2	328	42.2	13.1	190	0.17	8.8	15.7	2	1	1	2	23.0469	11.1	0.93	113	24.5	2.56	16.4	0.27	2	89.4
793	2	74	1	0	2	180	180	0	0	2	0	100	7.6	0.5	0.3	6.6	0.2	0	6.9	3.3	87.5	2	0.3	2.91	103	30.7	105.4	35.3	336	53	13.8	127	0.11	8.8	16.1	1	0	0	3	24.974	12.2	1.04	92.5	23.5	2.99	15.4	0.32	2.3	93.4
198	1	69	5	0	4	1000	200	1	1	1	1	100	4.1	1.2	0.3	2.5	0.1	0	7.9	60.6	29.9	1.2	0.4	3.62	120	36.4	100.5	33.2	330	53.4	14.5	147	0.17	11.2	16.2	2	2	1	3	18.6082	11.1	0.93	113	26.2	2.61	16.9	1.6	6.8	83.9
610	1	68	5	1	3	750	150	0	0	1	0	100	4.8	2.7	1.3	0.6	0.1	0	57	27.1	13.3	1.8	0.8	4.66	126	38.4	82.3	27.1	329	47.1	15.7	188	0.18	9.4	15.9	1	2	0	3	24.3375	10	0.87	116.1	27.2	2.89	18.4	0.73	3.4	87.8
280	1	58	4	1	4	836	209	0	1	1	1	100	5.2	1.3	0.6	3.3	0.1	0	24.7	11.6	62.6	1.1	0	3.95	130	38.2	96.8	32.9	340	63.5	18.1	139	0.12	8.6	15.8	1	0	1	3	18.5911	11	0.92	115.1	25.9	3.76	15.8	3.75	14.2	97.2
294	1	34	3	0	4	585	195	0	1	4	1	100	4.7	1.9	0.4	2.1	0.2	0	40.3	8.9	45.7	4.9	0.2	4.85	135	42	86.7	27.9	321	104.8	32.9	205	0.17	8.1	15.2	3	3	1	3	16.205	10.8	0.9	121.7	25.4	2.65	15.9	0.65	3.6	104.4
401	2	49	3	0	3	600	200	0	1	1	1	100	2.7	1.3	0.4	1	0.1	0	49.7	13	35.5	1.8	0	3.65	113	33.5	91.7	30.8	337	70.6	21.4	96	0.1	10.5	16.6	1	1	0	3	21.0772	10.2	0.85	130.8	21.5	2.55	15.3	0.52	2.5	108.5
123	2	62	1	0	2	200	200	0	1	1	0	100	4.7	0.3	2.8	1.5	0.1	0	7.2	58.6	32.1	1.7	0.4	3.85	111	34.1	88.7	28.7	326	41.9	12.9	265	0.22	8.5	15.4	2	0	0	3	21.9671	11	0.92	115.1	23.7	2.37	14.8	2.33	7.7	86.6
184	2	63	1	1	2	180	180	0	1	1	0	100	3.3	1.1	0.4	1.7	0.1	0	34.3	13.2	50.8	1.6	0.1	4.03	111	33.8	83.8	27.7	328	65.3	21.1	210	0.17	8.2	15.1	1	0	0	3	22.4766	11.8	0.99	101.6	27	3.07	16	0.36	2.1	95.2
203	2	61	5	0	4	900	180	0	1	1	1	100	3.3	1.6	0.3	1.4	0.1	0	47	8.9	40.8	2.9	0.4	3.74	131	38.5	102.9	35.1	340	55.1	14.7	151	0.15	9.9	16.2	1	2	3	3	23.7118	10.3	0.85	134.1	25.6	2.13	18	0.35	1.9	95.4
439	1	68	8	1	4	1040	130	0	1	1	0	100	9.4	1.2	0.5	7.6	0.1	0	13	5.1	80.7	0.8	0.4	4.07	126	39.1	96	31.1	322	52.8	15.1	292	0.35	12.6	15.9	2	2	1	4	22.2656	10.4	0.9	111.4	23.8	2.53	17.1	0.54	3.1	86.9
247	1	58	3	0	4	450	150	0	1	1	1	100	3.2	1	0.4	1.7	0.1	0	32	12.2	51.4	4.2	0.2	4.02	142	43.1	107.3	35.4	329	52.2	13.4	131	0.15	11.2	16.1	1	1	0	3	26.0262	10.87	0.9143	117.532	25.694	2.7465	16.87	0.7601	3.179	89.579
416	2	58	3	0	4	600	200	0	1	1	0	100	3.7	1.1	0.4	2.2	0	0	29.5	9.6	59	0.8	1.1	3.82	122	36.9	96.6	31.9	331	46.8	13.3	100	0.1	9.6	16.2	1	1	0	4	18.5178	11.1	0.93	113	24.2	3.72	15.2	0.44	2.4	94
736	1	47	3	1	3	420	140	0	0	1	1	100	3.7	1.1	0.3	2.2	0.1	0	30.1	7.1	60.6	1.8	0.4	4.18	107	33.3	79.6	25.5	321	53.5	18.6	177	0.17	9.5	16	0	2	0	2	20.7612	10.3	0.86	131.5	25.2	3.36	15.5	0.48	2.6	110.2
130	1	72	2	1	4	400	200	0	1	2	1	100	6.4	1.1	4.6	0.7	0	0	17.3	71.8	10.1	0.7	0.1	3.62	102	31.4	86.8	28.1	325	47.5	15.5	248	0.22	8.9	16	3	3	1	1	21.7738	11.8	0.99	101.6	26	4.9	14.1	1.11	4	92.3
403	1	47	8	1	3	1120	140	0	1	1	1	100	3.9	1	0.3	2.5	0	0	26.2	8.7	63.8	1.1	0.2	3.82	112	33.9	88.7	29.4	330	48.7	14.9	140	0.14	9.7	16.3	0	2	0	2	22.4913	10.2	0.85	130.8	25.4	3.67	16.9	0.84	3.6	104.8
656	1	54	7	1	4	1050	150	0	0	1	0	100	5.3	1.3	0.6	3.3	0.1	0	24.4	10.7	62.1	2.6	0.2	4.7	150	46.3	98.5	31.9	324	45.8	12.7	187	0.16	8.8	15.9	1	2	1	3	24.093	10.87	0.9142	117.529	25.4374	2.9961	16.458	0.7946	3.177	95.437
669	1	36	4	0	3	640	160	0	0	1	0	100	5.9	2	0.4	3.4	0.1	0	33.4	7.3	58.1	1	0.2	4.85	142	42.2	87.1	29.4	336	49	15.6	177	0.18	10.1	16.5	1	2	2	3	28.4005	10.4	0.86	131.5	25.8	2.95	15.4	0.35	2.3	87.1
756	1	60	1	0	4	180	180	0	0	1	1	100	2.8	0.6	0.5	1.6	0.1	0	20	19.1	57.4	2.7	0.8	4.36	128	38.3	87.9	29.4	334	46.3	14.6	266	0.23	8.5	15.4	2	2	1	2	23.0546	10.3	0.85	130.8	31.3	4.09	15.5	0.42	2.3	89
220	1	61	3	1	4	390	130	0	1	1	0	100	3.3	1.1	0.5	1.5	0.1	0	34.3	16.5	44.7	4	0.5	4.08	130	38.8	95.2	31.9	335	47.2	13.5	173	0.15	8.8	15.9	0	3	1	3	19.6235	10.2	0.85	134.1	26.9	3.39	16.6	0.69	2.8	119
758	2	56	2	0	3	400	200	0	0	1	0	100	4.7	1.9	0.3	2.3	0.1	0	41.2	6.1	49.3	3	0.4	3.61	108	32.9	91	29.9	328	44.1	13.1	163	0.21	13	16.5	1	2	0	2	27.0552	11.1	0.93	113	25.6	3.109	15.7	0.36	2.2	80.5
632	1	48	4	1	3	680	170	0	0	1	0	90	4.8	0.4	2.8	1.6	0.1	0	8.5	57.2	32.3	1.8	0.2	4.55	127	39.6	87.1	28	321	47.7	15	146	0.13	9.1	16.1	2	2	2	1	27.7743	10.5	0.87	128.9	24.1	3.13	16.1	0.41	2.1	93.6
761	1	64	2	0	3	300	150	0	0	1	0	100	5.9	1.9	0.5	3.3	0.2	0	32.6	8.4	56.1	2.5	0.4	4.14	133	39.1	94.5	32	340	62.2	18	223	0.2	9	15.7	2	1	0	4	20.0288	10.7	0.9	119.2	23.5	2.55	15.9	1.56	5.5	90.4
625	2	59	3	0	2	360	120	0	0	1	0	100	4	0.4	2.5	1	0.1	0	10.1	62.3	25.9	1.3	0.4	5.1	147	43.6	85.4	28.8	337	40.7	13.1	162	0.18	11	16.3	1	0	0	3	26.9127	11.6	0.97	105.2	27.1	2.84	14.6	0.36	2	91.1
699	1	66	4	0	2	800	200	0	0	1	0	100	6.5	2.2	0.7	3.4	0.2	0	33.2	11.2	52.4	2.7	0.5	3.84	120	36.2	94.3	31.2	331	59.2	17.4	103	0.14	13.5	16.9	1	0	0	3	24.9135	10.7	0.9	121.7	24.1	2.52	17.3	0.88	4.5	78.5
663	1	36	10	0	3	1600	160	0	0	1	0	100	9.1	2	0.7	6.3	0	0.1	21.8	7.9	69.5	0.3	0.5	4.02	120	36.9	91.7	29.8	325	59	18.1	324	0.27	8.3	15.6	1	2	2	3	28.4005	10.9	0.91	117.2	24.7	2.7	15.7	0.57	3	86.7
387	1	73	2	1	4	400	200	1	1	2	0	100	3.9	1.1	0.4	2.3	0	0	28.2	11.1	59.6	0.9	0.2	3.9	97	30.5	78.2	24.8	318	73.8	26.4	180	0.17	9.5	15.8	1	0	0	3	23.8895	11.6	0.97	103.7	22.4	2.35	16.6	1.185	3.6	85.8
805	1	63	1	1	4	200	200	0	0	1	0	100	7.9	1.3	0.4	6.2	0.1	0	16.1	4.7	78.4	0.6	0.2	3.37	96	29.7	88.1	28.6	323	54.4	17.3	172	0.13	7.8	15.5	1	1	0	3	19.5682	11.1	0.93	113	26.7	4.32	16.3	0.93	3.3	95.5
510	2	76	6	0	4	600	100	0	1	2	1	100	9.4	1.77	0.7	6.6	0.4	0.1	17.6	7.4	70.5	3.9	0.6	3.88	1277	37.9	97.7	32.7	335	49.1	14.3	139	0.13	9.5	16.3	3	3	1	2	24.864	10.2	0.85	134.1	23.2	2.73	21	0.65	3	80.5
268	1	49	5	0	3	750	150	0	1	1	1	100	5.4	2.6	0.4	2.2	0.1	0	49.4	7.6	40.1	2.7	0.2	4.17	143	42.1	100.9	34.4	340	55.8	15.1	186	0.17	9.1	16	1	2	0	3	27.0416	10.874	0.913	117.359	25.3688	12.6513	15.4121	0.6285	3.121	86.77
685	2	71	2	0	3	400	200	0	0	2	0	100	5.8	1.5	1	3	0.3	0	25.7	17.1	51.1	5.4	0.7	4.49	137	42.4	94.4	30.6	323	60.9	18.2	159	0.14	8.8	16.2	2	1	1	3	20.9572	10.8	0.91	119.5	24.5	2.22	18.4	0.44	2.4	88.2
442	1	68	11	1	4	1430	130	0	1	1	0	100	5.3	1	0.3	3.8	0.1	0	18.3	6.4	72.8	1.7	0.8	3.4	110	32.4	95.2	32.3	340	47.3	13.5	392	0.33	9.6	15.5	2	2	1	4	22.2063	10.3	0.89	112.5	25	1.98	16.4	0.18	2.4	78.7
497	2	66	3	1	4	540	180	1	1	1	1	100	3.4	1.6	0.3	1.4	0.2	0	46.5	8.3	40.3	4.4	0.5	4.37	125	38.7	88.5	28.7	323	81.9	25.8	201	0.21	10.2	16	3	3	1	3	20.4467	10.6	0.89	124.1	24.3	3	15.3	0.5998	2.989	103.145
113	1	64	3	0	3	450	150	0	1	1	0	100	8.7	6.6	1.1	0.7	0.3	0	75.8	12.4	8.5	3.1	0.2	4.38	136	40.4	92.2	31	337	45.6	13.7	176	0.18	11.5	17	1	1	0	3	21.4619	11.5	0.96	107.1	24.2	5.28	13.3	0.53	3.3	95.1
233	2	52	3	0	2	540	180	0	1	1	0	100	4.9	1.7	0.4	2.8	0	0	35.3	7.1	56.7	0.7	0.2	4.35	140	42.7	98.2	32.2	328	58.1	16.6	148	0.13	10.2	16	2	0	0	3	19.9573	10.5	0.87	128.9	23.7	2.33	15.1	1.64	5.9	113.7
723	1	19	2	0	3	200	100	0	0	1	1	100	4	2.1	0.4	1.4	0.1	0	52.8	9.4	35.2	2.1	0.5	4.56	135	42.1	92.3	29.6	321	56.7	17.1	197	0.19	9.5	15.8	1	1	0	1	16.9753	12.6	1.07	86.9	31.1	1.41	18.2	0.14	1.7	76.2
608	2	62	2	0	4	360	180	0	0	1	0	100	4.8	3	1.5	0.3	0	0	62.1	31.4	5.5	0.7	0.3	4.01	110	33.1	82.6	27.3	331	68.8	23.1	230	0.24	10.5	15.7	1	1	0	3	26.0146	10.7	0.93	108	24	3.05	16.8	0.95	3.2	83.3
374	1	60	2	0	4	400	200	0	1	1	1	100	4.8	1.6	0.4	2.5	0.3	0	33.5	8.4	52.1	5.4	0.6	5	147	44.6	89.2	29.5	330	49.5	15.3	209	0.25	12	16.7	2	1	0	3	24.9135	11	0.92	115	26.3	5.84	14.8	0.65	2.5	90.1
234	1	73	6	1	3	1200	200	0	1	2	1	100	12.4	1.2	0.9	10.3	0.1	0	9.7	7.2	82.5	0.5	0.1	4.28	102	33.3	77.8	23.9	306	48.9	17.3	148	0.13	8.6	15.4	1	1	0	2	23.03	10.9	1.01	97.8	27.6	2.2	16.5	0.42	2.2	75
657	1	54	6	1	4	900	150	0	0	1	0	100	5.6	1.3	0.6	3.4	0.2	0	23.8	11	61.8	3	0.4	4.6	151	46.3	100.6	32.9	326	46.7	12.8	143	0.13	9	16	1	2	1	3	24.6244	10.871	0.9138	117.529	25.317	3.107	16.117	0.7085	3.12	95.628
318	1	72	2	0	4	300	150	1	1	2	0	90	3.5	1.1	0.3	1.9	0.2	0	31.2	9.9	53.8	4.8	0.3	3.96	114	33.8	85.4	28.8	337	50.6	17.1	164	0.16	9.4	16.2	3	3	1	2	24.4261	11.6	0.98	103.3	24.2	2.29	16.1	4.32	13.6	83.8
411	2	63	3	1	2	540	180	0	1	1	0	100	2.7	0.9	0.4	1.3	0.1	0	33.4	14	48.3	3.7	0.6	3.47	107	32.1	92.4	30.8	333	71.1	21.1	162	0.14	8.6	15.4	1	0	0	3	20.635	11.6	0.97	103.7	24.6	2.96	16.4	0.42	2.5	96.4
745	1	57	5	1	3	900	180	0	0	1	0	100	2.8	0.9	0.3	1.5	0.1	0	31.1	10.9	54	3.8	0.2	4.41	133	41.1	93.1	30.1	324	62.5	18.4	103	0.11	10.8	16.2	2	0	0	2	28.075	10.4	0.87	128.9	25.1	2.33	17.5	0.36	1.9	83
359	1	73	4	0	3	760	190	0	1	2	1	100	5.9	1.4	0.7	3.8	0.1	0	23	11.1	63.5	2.2	0.2	3.61	131	37.9	104.9	36.2	346	74.9	19.8	137	0.14	10	16.4	2	2	0	3	23.7387	11.3	0.95	109	25.3	3.91	16.9	0.57	2.4	93.5
259	2	70	2	1	2	360	180	1	1	2	1	100	3.4	0.4	0.4	2.2	0.4	0	12.7	11.8	63.8	11.3	0.4	3.81	113	34.5	90.5	29.7	328	60	18.1	194	0.15	7.8	15.6	0	1	0	2	27.3438	10.5	0.87	128.9	27.5	2.52	16.8	1.36	5.9	79
628	1	48	3	1	3	510	170	0	0	3	0	100	4.5	0.4	2.6	1.5	0	0	8.5	56.3	34.1	0.7	0.4	3.38	108	32.5	96.1	32	332	70.8	20.6	205	0.17	8.2	15.8	2	2	2	1	27.4587	11.6	0.97	105.2	26.9	3.19	14.3	1.5	4.1	84.7
633	2	63	3	1	2	360	120	0	0	1	1	100	5	1.1	1.7	2	0.3	0	21.1	33.1	40.1	5.1	0.6	3.62	112	34.5	95.4	31	325	57.4	16.6	217	0.19	8.8	16.3	1	0	0	3	22.806	11.3	0.95	109	20.8	3.85	14.1	7.95	23.6	95.6
283	1	64	1	1	4	130	130	0	1	1	0	100	4.1	1	0.4	2.6	0.1	0	25.2	10.2	62.7	1.6	0.3	3.81	97	30.6	80.3	25.6	31.7	45.3	15.6	233	0.21	8.9	15.6	3	3	1	4	23.5078	11	0.92	115.1	23.3	4.11	15.4	1.93	7.5	86.7
377	1	56	7	0	4	1050	150	0	1	1	0	100	7	1.1	0.2	5.5	0.1	0	16	3.4	78.7	1.6	0.3	4.53	139	42	92.7	30.7	331	50.2	15	208	0.2	9.7	16	2	1	1	3	25	10.6	0.89	124.1	25.6	2.94	17.8	0.64	2.7	91.2
385	1	77	1	0	3	180	180	0	1	2	0	100	3.9	0.9	0.4	2.6	0.1	0	23.1	9.4	64.99	1.8	0.8	4.37	122	36.2	82.9	27.9	337	46.8	15.8	93	0.08	8.7	15.9	1	1	0	3	27.9421	10.6	0.88	123.6	23.9	2.69	16.4	1.15	4.6	76.9
225	2	70	1	0	2	150	150	1	1	2	0	100	3.3	1	0.3	2	0.1	0	30.5	7.5	59.5	1.7	0.8	3.88	117	36.2	93.2	30.3	323	56.5	16.7	141	0.15	10.3	15.8	1	0	0	3	22.719	11.1	0.93	113	27.2	2.25	16.9	0.43	2.8	83.2
788	1	68	2	0	4	300	150	0	0	1	0	100	4.5	1	3	3.1	0.1	0	21.6	7	68.1	2.77	0.6	3.93	126	3778	96.3	32	33	508	14.7	130	0.13	10.2	16.4	1	2	1	3	22.6627	11	0.93	113	24.2	4.85	14.8	0.58	3.3	96.2
681	1	57	3	1	3	540	180	0	0	1	0	100	3.5	0.7	0.3	2.5	0.1	0	18.7	8.1	70.7	1.7	0.8	3.92	122	36.6	93.4	31.3	333	48.5	14.5	158	0.14	9.1	15.8	2	0	0	2	28.075	10.876	0.9137	117.99	25.2148	2.5138	16.238	0.7423	3.299	88.04
473	2	60	9	1	4	1170	130	0	1	1	0	100	4.9	1.8	0.4	2.6	0.2	0	35.5	7.8	53	3.6	0.1	4.32	114	36	83.3	26.3	317	495	16.1	166	0.19	11.5	16.4	1	0	3	3	22.151	10.5	88	123.7	24.8	2.75	16.3	0.72	3.1	83.5
348	2	61	6	0	4	1080	180	0	1	1	1	100	3	1.4	0.2	1.3	0.1	0	46	7.7	43.5	1.7	1.1	3.66	126	37.8	103.4	34.5	333	59.2	15.6	140	0.15	10.8	16.1	1	2	3	3	23.7118	10.6	0.88	126.5	24.5	2.3	17.1	0.46	2.5	97.7
506	1	57	2	1	4	260	130	1	1	1	0	100	3.5	1.4	0.4	1.7	0.1	0	38.8	11.4	47.2	2.1	0.5	3.9	114	34.9	89.5	29.2	3277	44	13.5	304	0.25	8.3	15.8	3	3	1	2	22.6562	10.3	0.86	128.3	23.88	5.27	16.6	0.5	3.1	104.8
640	2	76	1	0	4	100	100	0	0	2	1	90	3.4	0.3	1.6	1.5	0.1	0	8.6	45.4	43	2.5	0.5	5.03	144	43.8	87.1	28.6	329	43.1	13.9	120	0.15	12.4	16	3	3	1	3	23.8054	11	0.92	117.2	25	1.78	18.2	0.76	3.4	94.7
818	1	55	2	0	2	400	200	0	0	1	0	100	4.2	1.3	0.4	2.4	0.1	0	30.9	9.8	57.4	1.2	0.7	4.05	106	32.7	80.7	26.1	323	56.5	19.4	197	0.19	9.5	15.5	2	0	0	3	26.9896	10.9	0.95	105.9	24.4	1.85	18.6	0.8	2.8	77.7
769	1	78	2	1	4	240	120	0	0	2	0	100	3.3	1.4	0.4	1.4	0.1	0	42.5	12.3	42	2.7	0.5	4.37	124	37.3	85.4	28.3	332	428	13.7	130	0.1	7.8	15.6	3	3	1	3	22.8625	10.867	0.9143	117.503	26.067	2.74249	16.531	0.8098	3.369	89.062
750	1	74	2	1	3	400	200	0	0	2	1	100	6.3	1.4	0.5	4	0.3	0	22.9	8.5	63.7	4.7	0.2	4.29	135	39.9	93.1	31.4	338	56.2	17.1	185	0.18	9.6	16.1	0	1	0	3	23.939	10.877	0.9132	117.327	25.2474	2.7556	16.133	0.7188	3.155	89.6197
620	1	70	2	1	3	360	180	0	0	2	0	100	3.9	2.3	1.2	0.3	0.1	0	59	30.1	8.3	1.8	0.8	4.42	146	43.7	98.9	33	333	54.2	15	125	0.13	10.9	16.6	2	1	0	2	24.6548	11.4	0.99	100.9	27.6	3.94	16.9	0.28	1.3	93
710	1	58	1	0	3	190	190	0	0	1	0	100	3.1	1.5	0.3	1.3	0	0	48.3	9.7	10.6	1.1	0.3	3.95	107	33.1	83.8	27.1	323	52.7	17.7	205	0.19	9.3	16.3	1	1	0	3	19.0311	11.7	0.98	103.4	25.8	1.63	17.8	1.26	6.2	83
646	1	61	2	1	4	260	130	0	0	1	0	100	3.3	0.4	1.7	1	0.2	0	13.1	51.3	29.4	5.4	0.8	4.46	116	36.1	81	26	321	51.9	17.5	178	0.17	9.3	15.9	0	3	1	3	19.6235	11.3	0.95	109	23.2	2.26	16.4	1.36	5.6	86.1
753	1	48	4	0	4	560	140	0	0	1	0	100	4.6	1.1	0.1	3.4	0	0	24	2	73.8	0.1	0.1	4.79	150	43.8	91.4	31.2	342	41.6	12.6	145	0.14	9.7	16.3	1	1	1	2	22.4913	10.9	0.91	117.2	23.5	5	15.4	4.83	14.4	107.5
557	1	80	1	1	4	125	125	0	1	2	0	100	5.9	1.9	0.6	3.3	0.1	0	31.3	9.8	56.5	1.8	0.6	4.34	133	40	92.2	30.7	333	50.6	15.1	188	0.19	10.3	16.1	1	1	0	1	21.1073	11.1	0.93	113	25.8	2.02	16.4	1.07	4	78.5
578	2	62	2	0	3	360	180	0	1	1	0	100	5.6	1.3	0.5	3.5	0.2	0	24.1	9.3	63.3	2.8	0.5	3.79	110	33.1	87.3	29.1	332	58.6	18.9	231	0.22	9.4	15.8	1	1	0	3	29.1363	10.6	0.88	123.6	22.5	3.37	14.4	0.34	2.1	100.4
86	1	54	3	0	2	600	200	1	1	1	0	100	5.2	1.9	2.5	0.6	0.2	0	36.3	48.5	11.8	3.1	0.3	3.22	112	32.4	100.7	34.8	345	77.6	20.8	108	0.11	10.1	17	2	0	0	2	21.4619	10.8	0.94	107	22.5	2.57	15.1	3.68	10.3	95.1
243	1	72	3	1	3	600	200	0	1	2	0	100	5.8	1.8	0.7	3.1	0.2	0.1	30.6	12.1	53.5	2.7	1.1	3.24	103	31.4	96.8	31.9	328	67.7	19.3	94	9	9.4	16	0	1	0	4	19.5502	12.9	1.1	83.3	27.3	1.78	16.8	6.09	18.9	65.6
160	2	42	4	0	3	760	190	0	1	1	0	100	4.9	1	0.4	3.4	0	0	20.69	8.8	69.2	0.7	0.4	2.96	90	28.2	95.2	30.3	319	89.8	26.2	161	0.14	8.5	15.5	1	1	0	2	19.1953	10.4	0.87	128.9	24.2	1.4	18.7	2.21	8	84.8
525	2	67	6	0	4	960	160	1	1	1	0	100	4.5	1.7	0.3	2.3	0.2	0	37.3	7	50.4	4.7	0.6	3.78	127	37.7	99.7	33.5	337	57	15.6	126	0.13	10.7	16.7	1	2	3	3	19.8791	9.8	0.82	141.3	26.7	3.12	16	0.86	3.3	104.8
36	2	53	4	1	4	480	120	1	1	1	0	100	5.5	3.4	1.7	0.3	0	0	61.4	31.3	6.1	0.8	0.4	3.68	103	33.5	91	28.1	308	54.1	16.2	265	0.25	10.2	15.7	1	1	1	3	26.6667	9.6	0.83	121.3	23	2.22	18.3	0.75	2.6	86.5
541	1	49	4	0	3	920	230	0	1	1	1	100	2.5	0.7	0.2	1.7	0	0	25.5	6.9	67	0.4	0.2	3.39	118	35.5	104.6	34.7	332	63	16.8	115	0.11	9.2	16.4	2	1	0	2	25.9516	10.9	0.92	115	24.5	2.55	17.2	0.54	3.6	95.8
171	2	60	6	1	4	780	130	0	1	1	0	100	3.6	1	0.5	2.1	0.1	0	26.7	12.9	57.4	2.3	0.7	4.04	105	33.4	82.6	26	314	54.5	18.4	160	0.18	11	16.8	1	0	3	3	23.7332	10.1	0.84	136.8	22.8	3.13	16.1	0.34	2.2	84.3
655	1	54	8	1	4	1200	150	0	0	1	0	100	5.1	1.2	0.6	3.1	0.1	0	23.9	12.3	61.3	2.1	0.4	4.66	153	45.9	98.6	32.8	333	46	12.9	158	0.15	9.3	16.2	1	2	1	3	23.9158	10.87	0.914	117.637	24.892	3.1698	16.404	0.705	3.147	96.549
712	1	74	1	1	3	200	200	0	0	2	1	100	5.1	1.4	0.4	3.1	0.2	0	26.5	7.3	61	4.7	0.5	3.96	123	36.5	92.1	31	337	45.2	13.9	143	0.15	10.4	16.2	0	1	0	3	24.9135	10.855	0.9132	117.262	24.94	2.5555	15.838	0.75955	3.166	85.607
704	1	77	1	0	3	200	200	0	0	2	0	100	5.1	1.4	0.4	3.1	0.2	0	26.5	7.3	61	4.7	0.5	3.96	123	36.5	92.1	31	337	45.2	13.9	143	0.15	10.4	16.2	1	2	0	3	24.3025	10.855	0.9132	117.268	24.907	2.5863	15.745	0.75735	3.199	85.854
781	1	65	1	1	2	200	200	0	0	1	0	100	4.4	1.7	0.4	2.1	0.1	0	38.8	9	49	2.6	0.6	4.37	129	39.4	90.1	29.6	327	46.9	14.5	185	0.2	10.8	16	1	1	0	3	22.7204	10.9	0.92	115	24.3	2.27	15.8	0.73	2.6	89.1
96	2	54	3	0	3	540	180	0	1	1	0	100	5	2.4	2.1	0.3	0.1	0	48.7	42.3	6	0.1	0	4.2	129	38.5	91.7	30.8	336	41.8	12.4	222	0.23	10	16	1	2	0	2	21.573	10.4	0.9	111.4	30.6	2.53	17.5	0.29	1.7	90
564	2	71	4	0	3	800	200	1	1	2	1	100	4.3	1.4	0.3	2.5	0.1	0	33.1	7.1	57.2	1.6	1	3.82	122	37.77	98.6	32	324	53.1	14.7	139	0.17	11.9	16.5	1	2	0	1	25.4581	10	0.83	139.6	26.1	3.4	16.6	0.45	2.5	81.9
241	1	60	3	1	4	600	200	0	1	1	0	100	6.8	1.5	0.3	5	0	0	21.9	4.7	727	0.4	0.3	3.59	114	35.3	98.2	31.7	323	50.6	14.1	244	0.21	8.7	16.1	0	2	1	1	20.5693	11.8	0.99	101.6	26.5	7.24	14.7	13.43	45	83.4
575	1	48	11	1	3	1540	140	0	1	1	1	100	2.7	1	0.3	1.4	0.1	0	35.4	9.8	52.5	1.9	0.4	3.85	116	35	91	30.2	331	44.3	13.3	107	0.12	11	16.3	0	2	0	2	22.8374	10.2	0.85	133.3	24	3.09	16.1	0.32	2	107.8
461	2	67	1	1	3	120	120	0	1	1	0	100	6.3	2.1	0.4	3.7	0.1	0	32.6	6.6	58.5	1.9	0.4	4.34	132	39.5	91	30.4	334	43.3	13.1	189	19	10.3	15.8	0	1	0	4	22.9857	11.4	0.96	105.4	262	3.77	17.2	0.81	3.1	89.3
554	1	62	1	1	2	200	200	0	1	1	0	100	4.1	1.5	0.5	1.9	0.2	0	35.9	11.3	46.3	5.9	0.6	3.86	126	37.2	96.3	32.5	339	48.4	14	146	0.14	9.6	16.3	1	0	0	3	22.5309	10.8	0.9	119.5	23.1	2.22	16.4	0.7029	3.238	93.392
729	1	43	2	1	4	300	150	0	0	1	0	100	4.4	0.7	0.3	3.4	0.1	0	14.8	6.2	76.7	2	0.3	4.11	128	39.4	95.8	31.1	325	52.6	15.2	216	0.23	10.4	16.9	1	0	1	3	21.1463	11.9	1	99.8	27.4	3.01	15.7	1.68	5.4	93.9
207	2	56	4	0	3	720	180	1	1	1	1	100	4.1	1.9	0.4	1.7	0	0	46	10.9	42.1	0.7	0.3	3.28	112	33.8	103.1	34.2	331	74.5	19.9	126	0.12	9.3	16	0	1	0	3	25.8876	11.1	0.93	113	24.5	2.37	16.1	0.7	3	87.2
393	2	72	2	1	3	360	180	1	1	2	0	100	4.3	1.2	0.3	2.7	0.1	0	28.5	7.7	61.5	1.9	0.4	4.33	140	41.6	96	32.4	337	56.1	16.2	146	0.13	9.1	16.1	1	2	0	3	27.8852	10.9	0.91	117.2	29.7	3	16.9	1.43	5.5	86.2
398	2	71	3	0	3	600	200	1	1	2	1	100	3.6	1.1	0.4	1.9	0.2	0.1	30.3	9.8	54.1	4.4	1.4	3.93	129	39.2	99.7	32.8	329	56.7	15.7	130	0.15	11.7	16.2	1	2	0	1	26.4463	10.6	0.89	121.4	26.3	3.34	15.8	0.53	3	88.2
705	1	66	4	0	2	520	130	0	0	1	1	100	11.5	1	0.8	9.5	0.2	0	8.7	6.8	82.4	1.9	0.2	3.86	105	32.4	83.9	27.2	324	52.4	17.2	147	0.13	9.1	15.7	2	2	0	2	24.3046	11.5	0.97	105.2	24.2	2.25	16.4	1.08	4.9	78.6
218	1	56	4	0	4	600	150	0	1	1	0	100	6.3	1.3	0.4	4.3	0.1	0	21.4	7.1	68.6	2.3	0.6	4.83	144	42.9	88.9	29.8	336	53.4	16.7	265	0.21	9.4	16	2	1	1	3	26.2346	10.7	0.9	121.7	26.6	3.85	15.6	1.71	6.8	95.4
5	1	70	1	1	4	200	200	1	1	2	0	100	11.4	3.1	7.7	0.4	0.2	0.1	26.8	67.4	3.6	1.7	0.5	4.22	100	31.7	75.1	23.6	314	64	23.9	112	0.1	9.4	15.2	1	1	0	3	25.7117	11	0.96	104.9	27.5	2.53	18.4	1.33	4	84.4
643	1	61	1	1	4	130	130	0	0	1	0	100	4	0.5	1.9	1.2	0.3	0	13	47.2	31	8.2	0.6	4.03	119	34.6	85.8	29.4	344	38.5	12.8	159	0.16	9.7	16.1	0	3	1	3	18.2899	10.4	0.87	128.9	25.1	3.22	17.2	0.28	2.2	109.3
744	1	58	1	0	4	200	200	0	0	1	0	100	4.2	0.7	0.4	3	0.1	0	16.1	9.1	71.2	3.4	0.2	4.41	142	41.6	94.4	32.1	341	48.6	14.3	167	0.17	9.9	16.3	1	1	0	1	23.6614	10.8	0.9	119.5	27.1	2.33	16.2	0.35	2.2	101.9
613	1	62	2	0	4	360	180	0	0	1	2	85	10.3	8	1.6	0.7	0	0	77.3	15.3	7.1	0.2	0.1	1.07	31	10.4	97.1	29.1	300	61.3	17.2	231	0.22	9.8	16.3	1	1	1	2	20.7612	13.1	1.14	79	26.1	2.49	17.4	13.92	40.9	60.6
547	1	69	2	0	4	360	180	0	1	1	0	100	4.7	0.9	0.4	3.4	0.1	0	18	8	70.7	2.6	0.7	3.43	105	30.8	89.9	30.6	341	52.1	16.2	153	0.15	10	15.9	1	1	0	3	22.0386	11.1	0.93	113	25.3	4.45	14.8	1.89	5.4	71.2
684	2	71	3	0	3	600	200	0	0	2	0	100	5.8	1.5	1	3	0.3	0	25.7	17.1	51.1	5.4	0.7	4.49	137	42.4	94.4	30.6	323	60.9	18.2	159	0.14	8.8	16.2	2	1	1	3	20.9572	10.8	0.91	119.5	24.5	2.22	18.4	0.44	2.4	88.2
99	2	56	3	0	3	600	200	0	1	1	0	100	3.1	1	0.4	1.7	0	0	32.8	11.3	55.1	0.5	0.3	3.79	123	35.7	94.3	32.3	345	78.3	23	135	0.11	8.4	15.9	1	1	0	3	22.6757	10.5	0.91	110.2	22.8	2.22	14.8	6.87	16.4	117.9
574	1	63	5	0	4	1000	200	0	1	1	0	100	4	1.6	0.4	1.8	0.1	0	40.1	10.1	45.8	3.3	0.7	3.83	128	37.6	98.4	33.3	340	54.6	15.2	87	0.1	10.8	16.7	1	2	1	1	20.1956	10	0.83	138.5	26.5	3.29	16.1	0.3	2	101.7
407	2	77	1	1	3	180	180	1	1	2	0	95	4.7	1.8	0.6	2.1	0.2	0	37.4	12.7	44.7	4.7	0.5	2.78	89	27.4	98.6	32	325	54.3	15.4	138	0.12	8.4	15.6	1	1	0	3	21.0962	11.8	1	99.8	22.9	2.29	17.1	2.13	6.3	79.2
503	2	70	4	0	2	600	150	1	1	2	0	100	2.9	1.1	0.3	1.4	0	0	377.9	9.5	50.1	1.1	1.4	4.1	130	39.9	97.4	31.8	326	55.7	15.6	131	0.15	11.6	16.6	1	0	0	3	23.1247	10.2	0.85	133.3	26	2.42	17.6	0.25	1.8	87.8
48	1	53	5	0	3	1000	200	1	1	1	0	100	6.7	4.5	1.5	0.5	0.1	0	67.5	22.4	7.4	2.2	0.5	5.01	115	37.4	74.6	22.9	308	57.6	21.5	255	0.24	9.2	15.7	2	1	0	3	22.2753	10.3	0.89	112.5	25.4	1.98	17.5	0.21	1	100.9
33	1	69	3	0	2	600	200	0	1	1	0	100	3.3	1.7	0.9	0.4	0.2	0	28.1	11.4	52.8	7	0.7	3.81	109	32.2	84.7	28.6	337	55.9	17.9	151	0.15	9.9	15.3	2	0	0	3	24.3911	11.7	1.02	96.9	26.4	2.32	17.6	3.13	9.5	80.3
201	1	73	1	1	4	200	200	1	1	2	1	90	4.5	1.2	0.5	2.8	0.1	0	26	10.6	62.1	1.1	0.2	4.08	94	30.2	74.1	23	311	48.6	18.6	192	0.19	9.9	16	1	0	0	3	24.2123	11	0.92	115.1	23.6	2.56	16.8	2.24	7.8	81.6
135	1	58	2	1	4	418	209	0	1	1	1	100	3.8	0.4	2.3	0.9	0.1	0	10.7	61.7	24.7	2.3	0.6	3.65	114	33.5	91.8	31.1	340	43.3	13.2	225	0.18	7.9	15.6	1	0	1	3	17.9151	11	0.92	115.1	23.8	3.43	14.8	1.57	10.3	96.6
28	1	76	4	1	2	640	160	1	1	2	0	100	4.7	3	1	0.5	0.2	0	65	10.8	20.7	3.1	0.4	3.8	135	38.9	102.5	35.6	347	49	13	212	0.21	10.1	16.3	2	0	0	3	23.7253	10.8	0.94	107	24.5	3	17	0.86	4.3	84.5
731	1	53	1	0	4	180	180	0	0	1	1	85	3.6	1.3	0.3	1.9	0.1	0	35.4	8.6	51.8	3.7	0.5	2.89	76	23.4	81.1	26.4	325	39	13.4	179	0.19	10.4	16.5	2	1	1	3	19.9432	11.7	0.98	102	19.1	2.46	15.1	1.23	4.8	94.8
231	2	50	7	0	2	1400	200	0	1	1	0	90	4.1	0.7	0.3	3.1	0.1	0	17.2	7	74.4	1.3	0.1	4.26	132	39.5	92.8	31	334	53.3	16	246	0.2	9.6	16.5	1	0	0	2	19.721	10.9	0.91	119.4	25.2	4.17	14.2	0.23	1.7	122.3
490	1	54	11	1	4	1650	150	0	1	1	0	100	4.4	0.7	0.5	3.2	0.1	0	15.8	10.9	71.6	1.5	0.2	4.3	137	42.3	98.3	31.8	324	49.1	13.8	136	0.12	9	16.5	1	2	1	3	23.3844	10.871	0.9134	117.414	25.3234	3.307	16.429	0.6918	3.192	87.77
379	2	62	2	0	3	340	170	1	1	1	1	100	5.2	1.5	0.4	3.2	0.1	0	28.6	7.4	62.7	1.1	0.2	3.71	120	36.7	98.8	32.3	327	57.7	16.1	170	0.16	9.4	15.8	1	1	0	3	21.2084	10.7	0.9	119.2	25.8	2.7	17.1	2.24	6.8	96.9
289	1	64	6	0	3	900	150	0	1	1	0	100	5	1.3	0.4	2.9	0.3	0	25.1	8.8	59.3	6.6	0.2	4.26	130	39.5	92.8	30.5	329	50.4	14.9	120	0.13	10.4	16.7	1	1	0	3	21.7776	11.6	0.98	103.3	25.6	2.13	15.2	0.69	3.7	82.6
419	1	70	1	0	4	200	200	0	1	2	0	95	3.5	0.7	0.3	2.5	0.1	0	20.3	7.8	69.3	2	0.6	3.93	123	36.9	93.9	31.2	333	46	13.6	95	0.12	12.9	16.7	0	1	0	3	21.7181	10.6	0.88	123.6	23.6	2.39	16.4	1.02	3.6	94.9
675	1	58	4	1	3	800	200	0	0	1	1	100	3.1	1.3	0.4	1.3	0.1	0	41	12.1	41.9	4.3	0.7	4.33	134	40.6	93.8	31	330	66.8	19.8	110	0.11	10.3	16	1	1	0	3	21.4692	10.5	0.88	126.5	24.3	202	17.5	0.3	2.6	81.4
392	1	65	5	1	4	750	150	1	1	1	0	100	6.4	2	1	3.2	0.2	0	31.5	15.2	50.4	2.4	0.5	3.83	107	33.4	87.2	27.9	320	58.9	18.5	114	0.1	8.9	15.4	2	2	3	3	23.3556	10.848	0.9138	118.429	26.4058	2.8538	16.631	0.7011	3.088	83.3678
593	2	64	4	1	4	680	170	1	0	1	0	100	5.3	3.7	0.9	0.7	0	0	69.4	17.4	12.2	0.7	0.3	3.79	134	37.8	99.7	35.3	353	70.7	19.1	106	0.1	9.4	16.3	2	2	1	3	24.1965	10.8	0.94	107	23.9	4.43	16.9	1.62	5.3	97.7
499	1	77	2	0	4	300	150	0	1	2	0	100	3.2	1.2	0.2	1.6	0.2	0	37.6	7.2	48.3	6.6	0.3	4.15	122	37	89.1	29.3	330	45.4	13.9	117	0.13	10.7	16.6	2	1	3	3	22.7732	9.9	82	142.5	26	4.71	15.2	2.09	7.2	94.2
139	1	51	6	0	4	1200	200	0	1	1	1	100	3.9	1.1	0.4	2.3	0.1	0	27.8	10.9	59	2.1	0.2	4.76	142	42.6	89.5	29.8	333	53.4	16.4	148	0.15	10.2	16.4	1	1	1	3	22.4913	10.872	0.9127	117.332	25.535	2.6929	16.59	0.6415	3.119	84.263
63	1	68	3	1	4	390	130	1	1	1	0	100	18.1	15.1	2.1	0.9	0	0	83.5	11.5	4.7	0.1	0.2	4.53	143	42.8	94.6	31.5	333	55.1	15.5	216	0.27	14.6	16.7	2	2	1	4	22.0386	9.7	0.83	120	23.4	2.11	19.1	1.1	3	96.1
472	2	60	10	1	4	1300	130	0	1	1	0	100	3.3	1.4	0.4	14	0.1	0	41	12.9	42.3	3.1	0.7	4.35	120	36.1	83.1	27.5	332	47.1	15.6	186	0.2	11	16.3	1	0	3	3	22.151	10.2	0.85	133.3	24.5	2.54	17	0.4	2.3	89.6
648	1	48	7	1	3	1190	170	0	0	1	0	100	4.1	1.2	0.4	2.4	0.2	0	28.5	8.6	58.8	3.7	0.4	4.2	105	33.5	79.7	25	313	53	18.1	244	0.21	8.7	15.4	2	2	2	1	27.4587	11.9	1.01	98.1	25.3	2.44	16.1	0.81	4.1	79.3
129	1	62	5	1	3	600	120	0	1	1	0	100	5.5	2.1	0.4	2.9	0	0	38.6	8	52.5	0.7	0.2	3.69	120	35.6	96.5	32.5	337	49.5	14.1	193	0.19	9.6	16.5	0	1	0	3	21.2245	12.6	1.07	87.4	26.5	2.32	17	0.41	3	103.6
808	1	65	2	1	4	240	120	0	0	1	0	100	8.7	1.3	0.5	6.8	0.1	0	15.2	5.8	77.6	0.9	0.5	4.31	116	35.5	82.3	27	327	48	16.1	277	0.23	8.1	15.2	1	1	1	2	18.8092	10.9	0.91	117.1	25.6	4.71	16.2	1.34	4.1	94.7
521	1	47	10	1	3	1400	140	0	1	1	1	100	4.2	0.9	0.4	2.9	0.1	0	21.2	9.9	67.4	1.2	0.3	4.07	122	36.6	90	30	333	45.9	13.9	115	0.12	10.5	16.4	0	2	0	2	22.4913	10.4	0.86	128.3	23.4	3.53	15.6	0.31	2.1	109.5
65	2	56	3	0	4	600	200	1	1	1	1	100	5.2	2.7	1.7	0.6	0.2	0.1	52.6	31.9	10.8	3.6	1.1	3.52	96	29.7	84.4	27.2	323	49.8	16.3	152	0.12	8.1	16.1	2	0	0	3	23.8343	10.8	0.94	107	24.4	3.29	17.9	1.2	4.9	90.8
15	1	47	2	0	3	240	120	1	1	1	0	100	5.1	2.6	1.9	0.5	0.1	0.1	82.7	9.5	7.2	1.6	1	4.3	133	39.1	90.9	30.9	340	45.1	13.7	203	0.21	10	15.9	3	1	0	2	22.8624	10	0.86	116.1	25.2	2.89	17.2	0.3	1.3	105.4
157	2	72	4	1	4	600	150	1	1	2	0	100	2.6	0.3	1.7	0.5	0.1	0	12.1	64.4	17.9	4.9	0.7	3.48	107	32.8	94.2	30.7	326	68.5	20.2	77	0.07	8.9	16.1	2	2	1	2	25.3333	10.7	0.9	121.7	25.2	2.61	16.4	1	2.4	106.7
41	1	43	4	0	2	800	200	0	1	1	0	100	5.8	2.8	2.4	0.5	0.1	0	47.5	41.5	8	2.5	0.8	4.25	147	43	101.1	34.6	343	52.2	14.2	232	0.22	9.3	16	2	0	0	3	22.5981	9.9	0.86	117.4	24.3	2.39	18.1	0.28	0.6	101.7
493	1	65	7	1	4	1050	150	1	1	1	0	100	4.9	1.5	0.6	2.7	0.1	0	30.3	12.3	55.8	1.4	0.2	3.74	103	32.77	877.3	27.5	315	55.2	17.3	91	0.08	8.6	16	2	2	3	3	23.6713	12.1	1.02	94.9	28.2	2.63	16.5	0.43	2.2	76.8
380	1	39	5	0	4	750	150	0	1	1	0	100	17.6	0.9	1.8	14.9	0	0	5.2	10.1	84.7	0	0	3.43	107	31.8	92.6	31.1	336	61	18.1	193	0.21	10.8	16.3	1	2	0	3	17.9462	11.6	0.97	103.7	30.2	12.25	14.1	3.23	14.3	76
188	2	68	4	1	3	660	165	1	1	1	1	100	2.9	1.9	0.2	0.7	0	0	64.9	8.1	25.4	1.5	0.1	2.67	97	29.3	109.8	36.5	331	80.7	19.8	70	0.07	10.3	16.4	0	1	0	3	24.8889	10.8	0.91	119.5	23.5	1.97	18.1	1.72	7.4	79.9
217	1	56	5	0	4	750	150	0	1	1	0	100	4	1.4	0.4	2.1	0.2	0	33.9	8.6	52.6	4.6	0.3	4.44	130	39.8	89.7	29.3	327	53.8	16.4	196	0.19	9.6	15.8	2	1	1	3	26.2346	11.1	0.93	113	24.8	3.47	16.2	1	4.5	83.7
53	1	66	4	1	3	520	130	1	1	1	0	100	4.6	2.3	1.5	0.6	0.3	0	49.1	32.3	12.4	5.4	0.8	4.47	117	36.1	80.7	26.2	325	52.4	17.4	298	0.24	8.1	15.6	2	1	0	3	21.3039	10.2	0.88	113.7	24.2	2.61	15.3	1.03	3.7	84.8
338	1	65	4	1	4	600	150	1	1	1	0	100	6.4	1.7	1.1	3.4	0.1	0	27.2	16.7	53.7	2.1	0.3	4.03	109	34.6	85.9	27.1	315	60.2	19.1	226	0.19	8.2	15.4	2	2	3	3	23.4568	11.8	0.99	101.6	27.7	2.75	16.4	0.43	2.5	70.4
720	1	62	1	0	2	200	200	0	0	1	0	100	4.6	1.5	0.5	2.5	0.2	0	32.6	10	53.1	3.8	0.5	4.78	139	41.8	87.5	29.2	333	46.1	14.7	90	0.11	12.3	17	1	0	0	3	24.5675	10.7	0.89	121.4	25.5	1.57	16.6	1.22	5.1	95.4
725	1	67	1	0	3	190	190	0	0	1	1	100	4.6	0.8	0.5	3.1	0.2	0	16.9	10	68.2	4.6	0.3	4.78	144	44	92.1	30.1	327	47.6	14.5	157	0.15	9.3	16	1	2	0	3	17.5415	11.9	1.01	98.1	26	3.19	15.4	3.25	10	84.3
296	1	67	4	1	3	480	120	0	1	1	0	100	4.7	0.4	2.5	1.6	0.3	0	8.5	52.2	33	5.8	0.5	3.96	103	30.8	77.9	26.1	334	52.4	18.5	161	0.06	9.5	15.9	2	0	0	3	19.3792	10.9	0.91	117.2	26.3	3.36	13.9	1.31	3.7	85.2
702	1	66	1	0	2	200	200	0	0	1	0	100	7.2	2.3	0.7	3.9	0.3	0	31.6	9.7	54.5	3.7	0.5	3.95	107	33.1	83.9	27.1	323	51.3	17	120	0.16	13.1	16.5	1	0	0	3	24.9135	11.1	0.93	113	23.9	2.48	15.2	1.17	4.7	82
252	1	73	3	0	3	570	190	0	1	2	1	100	5.3	1	0.6	3.6	0.1	0	18.7	11.8	67.1	2.3	0.1	3.47	119	36.1	103.9	34.3	330	77.3	20.4	127	0.13	10	16.3	2	2	0	2	24.977	11.2	0.94	111	24.8	3.91	15.6	0.5	3	92.9
727	1	43	4	1	4	600	150	0	0	1	0	100	5.6	0.8	0.3	4.4	0.1	0	13.4	6	78.8	1.4	0.4	4.38	138	42	96	31.6	329	51.6	14.7	285	0.29	10.2	16.6	1	0	1	3	21.1463	12.1	1.03	94.9	27.7	5.28	16.2	1.21	4.9	97.7
462	1	72	7	1	4	1400	200	0	1	2	1	100	10.8	1.3	1	8.6	0	0	11.5	8.9	79	0.4	0.2	3.22	100	31.9	99	31	313	69.3	19.1	145	0.15	10.4	16.3	3	3	1	1	20.3223	10.7	0.9	119.2	25.2	3.26	16.9	0.44	2.5	103.9
456	2	67	4	0	4	640	160	0	1	1	0	100	4.1	2.1	0.3	1.7	0.1	0	49.6	6.1	41.5	2.1	0.7	4.05	130	39.2	96.8	32.2	332	64.2	18.2	149	0.15	10	16.2	1	2	3	3	19.7239	9.9	0.82	141.3	26.1	2.79	16.3	0.88	2.8	101.2
827	1	68	2	1	3	300	150	0	0	1	0	100	3.9	0.9	0.5	2.3	0.2	0	23.1	13.5	58.8	3.9	0.7	4.36	118	35.5	81.4	27.1	333	58.5	19.1	203	0.19	9.2	15.2	1	2	0	3	24.3375	10.8	0.94	107	26.8	3.24	16.4	2.26	7.1	88.3
270	2	71	2	0	3	400	200	1	1	2	1	100	4.1	1.1	0.4	2.4	0.2	0	27.2	9.7	58.2	3.9	1	3.8	121	37.2	97.8	31.8	325	49.1	13.8	128	0.15	12	16.6	1	2	0	1	26.4463	10.5	0.88	126.5	27.2	3.19	16.7	0.68	3.9	84.5
202	1	68	3	0	3	600	200	0	1	2	1	90	2.7	0.5	0.3	1.6	0.2	0	20.2	11.2	59.9	8.1	0.6	3.48	103	32.1	902.3	29.7	321	60.4	17.9	121	0.12	9.4	15.8	0	1	0	4	20.2449	11.8	0.99	101.6	25.7	1.94	16.5	4.03	11.8	92.5
162	2	42	2	0	3	380	190	0	1	1	0	100	3.8	1.2	0.3	2.2	0	0	31.2	9	58.4	1.1	0.3	3.02	89	27.4	90.8	29.6	325	69	21.2	186	0.14	7.8	15.4	1	1	0	2	18.8189	10.7	0.9	121.7	25.2	1.25	17.4	3.52	11.5	83.8
556	2	61	13	1	4	1950	150	1	1	1	1	100	1.9	0.8	0.2	0.8	0.1	0	43.4	10.4	42	3.1	1.1	3.32	111	33.4	100.6	33.4	332	65.4	17.9	60	0.06	9.5	16.7	2	1	1	2	22.6562	10.7	0.89	121.4	22.8	3.09	20.7	0.54	2.6	106.3
730	1	43	1	1	4	150	150	0	0	1	0	100	3.9	0.6	0.4	2.7	0.1	0	16.2	10	69.8	3.7	0.3	4.03	126	38.4	95.2	31.2	328	51.4	14.9	173	0.17	9.9	16.2	1	0	1	3	21.1463	11.6	1.08	85.9	25.3	2.91	14.5	1.71	5.3	102.2
402	2	72	5	1	4	975	195	0	1	2	1	90	5.3	1.5	0.4	3.3	0.1	0	27.8	7.5	62.5	1.7	0.5	3.08	106	31.4	101.9	34.5	338	64	17.4	128	0.12	9	16.4	3	3	1	2	24.8889	12.4	1	100	31.3	3.38	17.3	2.22	10	125
703	1	19	1	0	3	100	100	0	0	1	1	100	2	1	0.5	0.4	0.1	0	50.1	22.7	19.8	5.9	1.5	4.04	117	35.6	88.1	28.9	329	52.7	16.4	130	0.12	9	15.9	1	1	0	1	16.9753	11.2	0.94	111	27.1	2.68	18.2	0.49	2.8	90.8
477	2	55	9	1	4	1620	180	1	1	1	0	100	6.9	1.9	0.6	4.2	0.2	0	27.5	8.3	61.8	2.3	0.1	3.82	122	37.8	98.9	31.9	323	52.6	14.3	243	0.23	9.5	16	3	3	1	3	21.2306	11.1	0.93	113	23.8	6.07	15.3	0.69	2.8	106.3
106	2	58	4	0	3	800	200	1	1	1	1	100	2.7	1	0.4	1.4	0	0	35.9	13.3	49.7	0.7	0.4	3.54	118	35.2	99.4	33.4	335	79.2	22	107	0.1	8.9	16.3	2	1	3	3	21.6797	10.4	0.9	111.4	24.2	2.55	14.6	7.51	17.2	118.3
566	2	66	4	1	4	720	180	1	1	1	1	100	2.9	1.2	0.2	1.3	0.2	0	41.7	7.9	44.4	5	1	4.24	131	39.3	92.6	31	333	78.1	23.3	136	0.14	10.2	15.7	3	3	1	2	20.4467	10.2	134.4	0.85	23.9	15.6	2.83	3.83	115.7	11.3
390	1	73	4	0	2	800	200	0	1	2	0	100	4.2	1.2	0.5	2.4	0.1	0	27.7	11.5	57.4	3.2	0.2	4.51	132	40.3	89.4	29.3	328	79.1	24.6	116	0.12	10.1	16.1	1	0	0	3	23.3556	11.2	0.94	111	24	2.28	16.3	0.85	3.3	86.1
2	2	76	4	0	2	720	180	1	1	2	0	100	5.4	2.9	1.8	0.6	0.1	0	52.9	33.1	11	2.5	0.5	3.39	114	34.2	100.7	33.7	335	59.2	16.3	145	0.15	10.3	16.2	2	0	0	2	21.6311	11	0.96	104.9	25.6	3.24	18.2	1.11	3.8	91.7
776	1	40	2	0	3	300	150	0	0	1	0	100	2.1	2.4	1	18.6	0.1	0	10.7	4.4	84.4	0.4	0.1	4.64	145	43.6	94	31.1	333	45.8	13.5	203	0.2	9.7	15.9	1	1	0	2	24.5675	11.2	0.94	109.1	25.7	2.1	19.6	0.28	1.8	133.2
562	1	64	4	0	4	800	200	1	1	1	1	100	3.9	1.3	0.3	2.22	0.1	0	34	7.1	56.3	2	0.6	3.82	122	37.1	97.1	32	329	55	15.8	69	0.08	11	16.4	3	1	0	3	18.7109	11.1	0.93	113	24.6	3.99	14.6	0.31	2.1	917
81	1	76	1	1	3	200	200	1	1	2	0	100	3.7	1.6	1.6	0.4	0.2	0	41.5	42.1	9.6	6.2	0.6	4.18	132	39.9	95.5	31.7	332	50	14.3	129	0.13	9.9	16.4	2	2	0	3	18.7109	11.1	0.96	103.9	25.1	2.46	15.6	1.15	4.5	79.1
206	2	56	5	0	3	900	180	1	1	1	1	100	4.4	2.1	0.5	1.8	0.1	0	47.2	10.2	41.1	1.2	0.3	3.28	122	36.3	110.6	37.1	336	78.2	19.5	104	0.12	11.3	16.6	0	1	0	3	27.0552	13.1	1	100	35.9	3.57	17.2	0.69	4	103
35	1	64	4	1	4	720	180	0	1	1	0	100	3.8	2.6	0.9	0.4	0	0	67.1	22.9	9.6	0.2	0.2	2.16	74	22.2	103	34.5	335	61.9	16.1	95	0.13	12.1	16.9	1	2	1	4	21.0938	13.1	1.14	79	33.7	4.52	16.3	7.56	19	65.6
509	1	57	4	0	3	920	230	0	1	1	0	100	6.3	1.6	0.6	4.1	0.1	0	25.4	8.6	64.5	1.4	0.1	4.1	125	377.6	91.6	30.5	332	52.3	15.5	98	0.13	12.7	16.7	1	1	0	3	25.1429	10.3	0.85	130.8	26.1	3.02	15.1	1.09	3.8	100.9
428	2	52	4	0	2	600	150	0	1	3	0	100	4.9	2.7	1.7	0.4	0.1	0	55	34.2	8.7	1.4	0.7	3.18	98	30.7	96.4	30.8	319	64.3	18.1	183	0.18	9.7	16	2	0	0	2	19.6506	11.4	0.99	100.9	25.6	3.12	16.5	0.3	1	105.2
455	1	34	5	0	4	975	195	0	1	4	1	100	3.8	1.4	0.4	1.8	0.2	0	37.1	10.5	46.5	5.7	0.2	5.04	145	44.4	88	28.8	327	98.9	30.8	180	0.15	8.1	15.6	3	3	1	3	16.7062	10.9	0.92	115	24.6	2.65	15.9	0.92	3.8	104.6
367	1	73	3	0	4	570	190	0	1	2	1	100	3.6	1.2	0.5	1.8	0.1	0	33.9	12.8	49.2	3.3	0.8	3.6	126	36.9	102.4	34.9	341	54.6	14.9	97	0.09	9.6	16.4	1	1	0	3	23.4568	10.8	0.91	117.1	27.1	3.34	17.8	0.58	3.3	96.6
92	1	77	3	1	3	600	200	1	1	2	0	100	4.7	2.7	1.3	0.5	0.2	0	56.9	28.5	10.1	3.9	0.6	4.37	141	40.6	92.8	32.3	348	45.5	13.4	153	0.16	10.6	16.5	1	1	0	3	22.1443	11.6	1.01	98.4	28.2	3.38	17.7	0.37	2	77.6
340	1	58	2	1	4	400	200	1	1	1	1	100	3.9	1	0.5	2	0.5	0	24.7	12.1	51.5	11.5	0.2	4.73	114	36	76.1	24.2	317	91.4	34.5	197	0.2	10.4	15.3	2	0	1	3	23.3844	10.5	0.88	126.5	14.7	2.18	17.1	0.82	3.7	86.3
565	2	61	1	0	4	120	120	0	1	3	1	100	5.5	1.5	0.7	3.1	0.1	0	27.3	13.3	56.6	2.2	0.6	3.96	127	37.4	94.5	32.1	340	43.2	12.6	148	0.15	10	16.1	1	2	1	2	21.4573	11.4	107.3	0.95	25.3	17.1	2.42	0.26	85.4	1.8
346	2	67	3	0	4	540	180	0	1	1	1	100	22.7	1.6	1.2	19.7	0.2	0.1	7.1	5.1	86.9	0.7	0.2	3.02	93	29	96	3.1	321	108.4	28.9	87	0.09	10.1	15.7	1	1	1	3	24.0346	11.9	1	99.8	23.5	1.9	18.1	0.73	3	82.6
242	1	72	4	1	3	800	200	0	1	2	0	100	4.5	2.1	0.5	1.6	0.2	0.1	45.8	11.4	36.5	5	1.3	3.38	114	34.2	101.1	33.7	333	67.2	18.3	82	0.08	10	16	0	1	0	4	19.5502	11.6	0.98	103.3	26.1	1.27	17.9	4.7	16.5	66.6
14	1	56	5	1	4	750	150	1	1	1	0	100	9	6.5	1.3	0.8	0.4	0	72.2	13.9	8.9	4.7	0.3	4.53	135	41.3	91.1	29.8	327	47.1	14.2	235	0.24	10.5	16	3	3	1	2	27.0993	11	0.95	104.9	30.1	6.55	17.3	1.47	5.4	98.9
316	2	55	8	1	4	1440	180	1	1	1	0	100	5	1.7	0.5	2.6	0.2	0	34.4	10.8	51.5	3.3	0	4.05	132	40.6	100.2	32.5	325	54.2	14.7	144	0.14	10	16.2	3	3	1	3	21.2306	10.88	0.9136	117.737	24.7	3.3338	16.434	0.7385	3.155	90.873
601	2	49	6	0	4	780	130	0	0	1	0	90	6.8	4.8	1.5	0.5	0	0	70.7	21.6	7.5	0	0.2	3.61	84	26.7	73.9	23.3	315	51	18.6	250	0.23	9.3	15.8	1	1	0	3	21.797	10.9	0.95	105.9	22	2.3	15.3	1.55	4.9	90.1
388	1	58	4	0	4	600	150	0	1	1	1	100	3.7	1.5	0.3	1.7	0.2	0	40.6	7.8	45.5	6	0.1	4.05	142	42.6	105.1	35.2	333	79.8	20.8	140	0.13	9.6	16.7	1	1	0	3	24.8457	10.1	0.84	136.8	31	3	17.8	0.38	2.4	87.9
274	1	73	2	0	4	380	190	0	1	2	1	100	3.5	1.2	0.5	1.7	0.1	0	33.3	13.4	49.8	3	0.5	3.72	128	37.3	100.3	34.3	343	48.3	13.4	132	0.12	8.9	16.2	1	1	0	3	23.4568	10.9	0.91	117.2	26.5	3.89	15.7	0.79	4.1	103.6
167	2	73	2	1	3	300	150	0	1	2	0	100	3.9	1.2	0.5	2.1	0.1	0	31.3	13.4	53.3	1.9	0.1	3.21	114	34.7	108	35.4	329	59.6	15	96	0.13	11.7	16.4	1	2	0	2	23.4952	10.9	0.91	117.2	27.3	2.61	14.6	0.41	1.6	93.4
823	2	40	2	0	2	400	200	0	0	1	0	100	3.7	1.4	0.4	1.8	0.1	0	36.5	9.9	49.4	3.6	0.6	3.49	96	29.6	84.8	27.7	326	58.6	19.1	183	0.2	10.2	16	2	0	0	2	31.051	10.3	0.89	112.5	22.6	2.29	18	0.41	1.9	95.8
647	1	51	3	0	2	360	120	0	0	1	1	100	3.3	1	0.4	1.7	0.2	0	29.4	13.1	51.3	5.4	0.8	4.46	116	36.1	81	26	321	51.9	17.5	178	0.17	9.3	15.9	1	0	0	2	22.7732	11.3	0.95	109	23.2	2.26	16.4	1.36	5.6	86.1
485	1	62	5	1	4	1000	200	0	1	1	1	100	3.7	1.6	0.3	1.7	0.1	0	42.3	8.3	45	3.7	0.7	2.78	96	28.5	102.5	34.7	337	65.2	17.6	174	0.14	8	15.8	3	3	1	3	20.0692	11.6	0.97	103.7	25.4	3.29	14.9	0.66835	3.082	84.227
812	1	63	1	1	3	180	180	0	0	1	0	100	2.8	1.2	0.3	1.3	0.1	0	40.9	12	44.1	2.4	0.6	3.46	99	30.2	87.2	28.7	328	39.5	12.5	116	0.13	11.1	16.4	1	1	0	3	24.9108	11.7	0.99	101.6	21.6	1.88	16.9	0.2	1.8	91.9
505	1	61	6	1	4	780	130	0	1	1	0	100	4.7	1.2	0.4	3	0.2	0	25	8	63.5	3.3	0.2	3.95	126	39.1	99.1	32	322	50.1	13.77	149	0.16	10.8	16.6	0	3	1	3	17.9089	9.9	0.82	142.5	26.7	2.54	16.9	0.41	2.1	109.9
244	1	72	2	1	3	400	200	0	1	2	0	100	4.4	1.6	0.4	2	0.3	0.1	36.7	8.9	46.1	6.9	1.4	3.44	105	32.2	93.6	30.4	326	60.2	17.7	126	0.12	9.7	15.8	0	1	0	4	19.5502	12	1.01	98.1	27.3	1.68	15.6	7.81	18.3	66.6
567	2	64	5	0	4	500	100	0	1	1	1	100	4	0.8	0.3	2.7	0.1	0	19.7	8.2	68.2	3.5	0.4	2.93	92	27.8	94.9	31.5	331	54.3	16	205	0.28	13	16.4	2	1	3	2	19.5556	11.8	98.6	1	23.7	15.1	2.6	0.35	91.1	2.1
563	1	78	4	1	4	480	120	0	1	2	0	100	3	1.2	0.4	1.4	0.1	0	39	12.1	46.3	2.3	0.3	4.37	125	37.7	86.3	28.6	332	46.8	15.1	82	0.06	7.8	15.7	3	3	1	3	22.8625	10.872	0.9136	117.744	24.9628	2.6593	16.451	0.7731	3.269	86.987
687	1	79	1	1	4	120	120	0	0	2	1	100	5.7	2	0.4	3	0.2	0.1	35.8	6.9	52.3	4	1	3.75	110	34.6	92.3	29.3	318	45.5	13.5	136	0.18	13.1	16.4	1	1	0	3	21.7738	10.9	0.91	117.2	24.1	3.44	15.5	0.9	3.9	85.8
190	1	54	2	1	4	440	220	0	1	1	1	100	3.7	1.4	0.3	1.6	0.4	0	37.8	8.9	42.6	9.8	0.9	3.23	108	32.9	101.8	33.6	328	709	19.3	128	0.14	10.6	16.3	2	2	1	3	20.2449	11.1	0.93	113	27.1	1.82	16.1	0.34	2	99.3
783	2	84	1	0	3	100	100	0	0	2	0	75	6.7	2	0.3	4.3	0.1	0	29.6	5.1	63.4	1.6	0.3	4.13	95	30.4	73.5	23	313	58.4	21.7	113	0.1	8.5	15.4	1	2	0	3	22.4444	12	1.02	95.5	25.4	22.38	15.7	4.68	14.7	74.2
700	1	66	3	0	2	600	200	0	0	1	0	100	6.8	2.3	0.6	3.6	0.2	0	34.4	9.1	52.8	3.3	0.4	3.79	114	35.2	92.9	30	324	62.4	18.4	160	0.2	12.5	16.2	1	0	0	3	24.9135	10.9	0.91	117.2	23.3	3.39	14.8	1.08	4.7	76.4
476	1	65	6	1	4	1200	200	0	1	1	0	100	3.1	0.8	0.3	1.9	0.1	0	26.8	10	61.2	1.6	0.4	3.87	136	40.8	105.3	35	333	65.5	16	58	0.09	14.9	16.9	1	1	0	2	24.3375	11.3	0.95	109.1	27.6	3.7	15.5	0.17	1.3	1022
682	1	57	2	1	3	360	180	0	0	1	0	100	3	1.1	0.5	1.2	0.1	0.1	38	17.5	38.9	4	1.6	4.29	120	37.1	86.5	27.8	323	47.7	15.2	193	0.18	9.1	15.8	2	0	0	2	28.075	10.7	0.9	121.7	25.7	2.74	17.4	0.69	3.1	88.1
511	1	58	3	0	3	570	190	1	1	1	0	100	3.1	1.2	0.4	1.4	0	0	40.3	12.6	45.9	1.1	0.1	3.59	114	34.3	95.6	31	332	87.2	25.3	140	0.14	9.8	16.2	1	1	0	3	19.3772	11.4	0.95	107.3	24	2.25	15.888	0.9	3.5	86.4
59	1	56	2	0	3	300	150	0	1	1	1	100	4.8	2.7	1.3	0.6	0.2	0.1	55.9	26.2	13.3	3.5	1.1	3.36	95	29.4	87.4	28.3	323	53.5	16.3	327	0.27	8.4	16	1	1	0	3	22.5981	11.9	1.04	94	24.8	2.82	15.1	1.22	4	73.9
475	1	49	3	0	3	690	230	0	1	1	1	100	3.1	0.7	0.1	2.3	0	0	21.2	4.4	73.88	4	0.2	3.58	122	36.4	101.7	24	335	61.6	16.9	123	0.11	8.9	16.1	2	1	0	2	25.9516	10.873	0.9136	117.355	25.329	2.6632	15.967	0.7084	3.236	85.332
561	1	57	5	0	4	1000	200	0	1	1	1	100	4.3	1.9	1.5	0.6	0.2	0	45.3	34.2	14.7	4.9	0.9	4.01	131	39.6	98.8	32.8	331	69.6	17.8	96	0.09	9.3	16.9	1	1	0	3	24.3025	11.1	0.93	113	25	2.25	16.9	0.41	2	83.3
748	1	72	1	1	4	150	150	0	0	2	0	100	6.5	1.3	0.3	4.8	0.1	0	20.1	4.7	74	1.1	0.1	3.54	85	27.5	77.7	24	309	85.3	30.4	181	0.16	8.9	15.1	1	1	1	3	22.3875	11.145	12.2583	117.425	26.894	55.5496	13.4644	0.77045	3.165	81.1574
253	1	65	3	1	4	450	150	1	1	1	0	100	4.8	1.8	0.8	2	0.1	0.1	38.4	16.8	42.1	1.7	1	4.12	111	35	85	27	317	63.8	20.6	70	0.06	8.6	15.2	2	2	3	3	23.1481	11.9	1.01	98.1	28.5	2.83	16.2	0.37	2.4	73.6
22	1	69	2	0	3	400	200	1	1	1	0	100	4.4	2.6	1.8	0.4	0.2	0	27.1	9.3	58.8	4.3	0.5	3.88	126	38.1	98.3	32.5	331	60.5	16.8	191	0.2	10.1	16.3	2	2	0	3	19.3098	10.2	0.88	113.7	25.2	3.11	15.5	1.07	3.8	96.9
314	1	72	5	1	4	1000	200	0	1	2	1	100	9	1	0.7	7.2	0.1	0	11.6	7.3	80.4	0.6	0.1	3.7	116	36.3	98.1	31.5	320	68.7	19	88	0.09	10.5	16.4	3	3	1	1	20.3223	10.2	0.85	134.1	25.1	5.28	14.5	0.38	2.8	111
460	1	77	1	0	4	150	150	0	1	2	0	100	3.2	1.1	0.3	1.6	0.3	0	33.3	88.1	49.4	8.3	0.9	4.18	124	37.8	90.4	29.7	328	44.9	13.7	204	0.2	10	16.3	2	1	3	3	23.5078	10.2	0.85	133.3	26.1	4.57	15.8	232	8	106.5
161	2	42	3	0	3	570	190	0	1	1	0	100	3.1	1.1	0.3	1.6	0	0	37	9.6	51.8	1.1	0.5	3.12	91	28.8	92.4	29.3	316	77.3	23.2	158	0.14	8.9	15.9	1	1	0	2	19.1953	11	0.92	115.1	24.5	1.4	16.3	1.58	6.3	82.2
277	1	70	6	1	4	720	120	0	1	2	0	100	5.2	1.4	0.5	3.1	0.2	0	26.6	9.8	59.3	3.7	0.6	4.03	107	34.1	84.6	26.6	314	54.5	17.6	225	0.22	10	16.1	1	2	1	3	22.7732	12.1	1.02	94.9	26.9	2.63	18.9	0.35	2.4	67.9
192	2	67	2	0	4	360	180	0	1	1	1	100	2.6	1	0.5	0.8	0.2	0	39.5	21.3	30.6	7.4	1.2	3.29	93	29.4	89.3	28.3	316	98.3	32.1	46	0.04	9.4	15.8	1	1	1	3	24.0346	11	0.92	115.1	23.9	1.87	17.8	1.44	5.3	91.8
386	1	63	3	0	4	600	200	0	1	1	0	100	5.2	1.1	0.7	3.3	0.1	0	21.4	12.7	63.6	2.1	0.2	3.68	121	35.3	95.8	32.7	343	75.2	21.5	82	0.09	10.4	16.4	1	2	1	1	21.2585	10.4	0.87	126	26.7	4.56	15.1	0.19	1.7	100.5
414	1	60	9	1	2	1800	200	0	1	1	0	100	3.8	1.1	0.3	2.3	0.1	0	27.9	8.9	60.9	2	0.3	3.74	90	29.1	77.7	24	309	69.2	24.4	81	0.08	10	15.4	1	0	0	3	22.0522	10.1	0.84	133.3	24.1	2.13	17.1	1.57	5.2	90
492	1	64	3	0	4	600	200	1	1	1	1	100	4.4	1.6	0.3	2.4	0.1	0	35.4	6.5	55	2.7	0.4	3.8	121	36.5	96	31.8	332	51	14.7	134	0.15	11.1	16.3	3	1	0	3	18.7109	11.4	0.95	107.3	25.1	2.59	13.3	0.2	1.5	80.8
344	1	60	5	1	4	1000	200	0	1	1	0	100	3.9	1.3	0.4	2.3	0	0	32.2	9.3	57.4	0.7	0.4	3.29	1.4	32.3	98.2	31.7	322	65.5	18.6	131	0.12	8.7	16.1	0	2	1	1	21.0772	11.2	0.94	111	24.5	30.9	15.6	23.15	63.9	86.8
770	1	66	7	0	2	910	130	0	0	1	1	100	7.9	1.2	1.4	5.1	0.3	0	15.6	17.1	63.7	3.2	0.4	3.69	105	32.7	88.5	28.3	321	57.1	17.7	240	0.23	9.6	16	2	2	0	2	24.3046	11.1	0.94	111	24.6	2.7	15.5	0.79	3.6	77.5
309	1	54	4	0	3	560	140	0	1	1	0	100	4.5	1.9	0.6	2	0	0	42.7	12.7	43.6	0.6	0.4	4.47	142	43	96.1	31.9	330	50.2	14.3	243	0.23	9.6	16.2	1	2	0	1	22.7732	10.2	0.84	136.8	27.9	3.88	14.9	3.29	7.1	105.9
662	1	53	1	1	4	150	150	0	0	1	0	100	6.8	1.3	0.7	4.8	0	0	19.4	9.9	69.8	0.5	0.4	3.68	116	34.8	94.5	31.6	333	70.5	20.8	267	0.22	8.2	15.5	1	2	1	3	24.6244	10.8	0.91	119.5	24.7	2.8	17.3	0.64	3.3	89.2
131	1	72	3	1	4	600	200	0	1	2	1	100	5.4	1	0.6	3.6	0.2	0	18.5	10.8	66.8	3.7	0.2	3.28	96	30	91.6	29.2	320	67.2	20.8	210	0.19	9	15.8	3	3	1	1	21.7738	11.2	0.94	113	26.8	3.26	15	0.64	3.4	100.4
664	1	36	9	0	3	1440	160	0	0	1	0	100	6.9	1.7	0.3	4.8	0.1	0	24.6	4.8	69.8	0.7	0.1	4.79	148	43.6	91	30.9	339	42.9	13	188	0.18	9.7	16.3	1	2	2	3	29.0688	10.2	0.85	134.1	24.4	3.32	16.9	0.44	2.4	101.7
100	2	55	2	0	3	400	200	0	1	1	0	100	2.7	1	0.4	1.4	0	0	35.9	13.3	49.7	0.7	0.4	3.54	118	35.2	99.4	33.4	335	79.2	22	107	0.1	8.9	16.3	1	1	0	3	22.6757	10.4	0.9	111.4	24.2	2.55	14.6	7.51	17.2	118.3
373	1	72	6	1	4	1200	200	0	1	2	1	100	13.1	1.1	1.5	10.4	0.1	0	8.7	11.4	79.4	0.5	0	2.98	91	28.4	95.3	30.6	320	61.1	17.5	61	0.07	11.2	16.6	3	3	1	1	20.3223	10.7	0.9	119.2	25.4	3.41	16.8	0.67	3.3	93.6
88	2	74	4	0	3	600	150	1	1	2	0	85	2.9	0.9	1.5	0.3	0.1	0	32.1	53.4	11.8	2	0.7	3.55	111	33.2	93.6	31.2	333	70.3	21	136	0.12	8.9	15.9	1	2	0	3	21.299	10.3	0.89	112.5	25.6	1.98	18	1.5	4.9	84.5
459	1	64	3	1	4	390	130	0	1	1	0	100	5.7	1	0.4	4.3	0.1	0	17.3	6.2	75.1	1.1	0.3	3.74	103	31.5	84.1	27.5	327	59.1	19.4	167	0.16	9.8	16.2	3	3	1	4	23.5078	10.8	9	119.2	22.9	309	15.6	0.65	2	80
331	1	56	2	1	4	480	240	0	1	1	1	95	11.6	1.9	1.6	8.1	0.1	0	16.2	13.7	69.6	0.4	0.1	3.65	108	33	90.4	29.5	327	59.3	18	115	0.12	10.6	16.4	3	2	1	3	21.7993	10.971	0.916	115.207	26.759	3.6179	16.044	0.7197	3.295	88.2567
215	1	58	1	0	4	200	200	1	1	1	1	100	4.2	1.3	0.4	2.3	0.3	0	29.7	9.5	54	6.2	0.6	4.99	111	35.3	70.7	22.2	314	54.4	22.9	227	0.22	9.8	15.3	2	0	1	3	21.4533	11.1	0.93	113	23.6	1.85	17.4	0.65	3	81.7
467	2	67	4	0	4	720	180	0	1	1	1	100	2.4	1	0.5	0.8	0	0	40.6	21.2	34.9	1.888	1.5	3.34	100	32	95.7	30	313	83.3	24.3	129	0.13	10.4	16	1	0	0	3	24.4352	11.3	0.95	107.3	24.9	2.1	18.1	0.61	2.6	94
122	2	55	7	1	4	1260	180	1	1	1	0	100	6.2	2.1	0.7	3.3	0.1	0	1.5	10.6	53.5	1.5	0.3	3.85	125	38.6	100.3	32.5	324	51.4	14	198	0.19	9.6	16.3	3	3	1	3	21.2306	10.2	0.85	134.1	24.5	3.25	17	0.31	2	91.3
615	2	51	2	0	2	400	200	0	0	1	0	100	4.2	2.2	1.7	0.3	0	0	51.2	40.9	6.3	1	0.6	5.01	143	43.2	86.2	28.6	332	40.9	13	233	0.2	9.1	15.9	2	0	0	3	25.4581	9.7	0.84	120	23.9	2.53	18	0.37	2	93.4
21	1	70	5	1	4	1000	200	1	1	2	0	100	6.4	4	1.8	0.4	0.1	0.1	28.4	5.9	62.9	2	0.8	4.83	145	43.8	90.6	29.9	330	44.9	13.4	251	0.25	10.1	16.8	1	1	1	3	25.2826	10.4	0.9	111.4	28.4	3.48	15.4	0.31	0.6	118.7
701	1	66	2	0	2	400	200	0	0	1	0	100	6.9	2.1	0.6	4	0.2	0	31	8.6	57.9	2.3	0.2	4.21	122	37.6	89.3	29	324	68.2	21.1	133	0.15	12.3	15.9	1	0	0	3	24.9135	10.4	0.87	128.9	24.2	2.48	15.8	1.05	3.9	84.1
72	1	68	4	1	4	520	130	0	1	1	0	100	15.9	13.6	1.8	0.5	0	0	85.8	11.1	2.9	0	0.2	4.46	143	43.6	97.8	32	328	51.4	14.4	219	0.29	15.3	16.1	2	2	1	3	22.0386	9.8	0.84	118.7	24.2	2.06	17.8	1.13	4.7	94.2
107	2	58	5	0	3	1000	200	1	1	1	1	100	3.7	1.1	0.3	2.3	0	0	28.9	8.9	61.5	0.6	0.1	3.37	111	34.6	102.7	33.1	321	60.3	16	176	0.18	10.3	17.1	2	1	3	3	21.875	10.5	0.91	110.2	23.8	2.73	15.1	1.48	4.6	103.7
271	2	60	1	1	2	180	180	0	1	1	0	100	3	1.4	0.4	1.2	0	0	46	13.1	40	0.7	0.2	3.57	107	32.5	90.9	30.1	329	56.5	17.3	111	0.09	7.9	15.6	2	0	0	3	22.0386	10.4	0.86	131.5	23.5	2.3	16.6	0.77	4.2	97.4
436	1	68	5	1	4	650	130	0	1	1	0	100	4.1	1	0.4	2.5	0.1	0	25.4	10.1	61.1	2.8	0.6	4.23	132	40.8	96.5	31.2	324	47.5	13.5	198	0.25	15.5	16.3	2	2	1	4	22.0386	10.1	0.87	114.9	26.3	2.35	18.3	0.41	1.3	85.6
103	2	27	1	0	4	100	100	1	1	2	1	100	3.2	0.1	1.4	1.5	0.1	0	4.2	45.4	46.8	2.4	1.2	3.19	98	28.7	90.1	30.8	341	47.6	14.7	132	0.16	12	16.5	1	1	0	3	15.5896	10.4	0.9	111.4	27.1	2.43	15.1	0.64	2.6	83.8
609	1	66	1	1	3	130	130	0	0	1	0	90	5.1	2.9	1.3	0.5	0.3	0.1	57	25.9	10	5.9	1.2	4.16	98	30.8	74	23.6	319	57.5	21.4	417	0.32	7.7	15	2	1	0	3	23.0112	10.8	0.94	107	27.1	3.48	17.4	1.47	4.5	89.5
458	1	70	8	1	4	960	120	0	1	2	0	100	6.2	1.2	0.5	4.2	0.2	0	19.9	8.8	67.6	3	0.7	3.73	101	31.8	85.2	27.1	318	46.9	15.1	245	0.25	10	16.1	1	2	1	3	22.7732	12	1.01	97	27	3.02	14.1	4.43	14.5	72.5
291	1	64	4	0	3	600	150	0	1	1	0	100	2.4	1	0.3	0.9	0.2	0	11.5	37.8	41.2	9.2	0.3	4.28	131	38.9	91	30.6	337	45.6	13.7	150	0.16	10.8	17.1	1	1	0	3	21.4619	12.4	1.05	90.3	25.6	2.37	15.8	0.47	3	83.2
559	1	72	5	0	4	750	150	1	1	2	0	95	2.7	0.7	0.3	1.3	0.4	0	25.1	10.6	48.9	14.2	1.2	3.18	103	229.9	94	32.2	344	69.5	20.6	179	0.15	8.4	16.1	3	3	1	2	24.4261	11.9	1	98.6	22.9	1.97	16.2	2.45	8	85.3
169	2	60	8	1	4	1040	130	0	1	1	0	100	4.4	1.4	0.5	2.4	0.1	0	30.8	12	55.1	1.7	0.4	4.13	109	34.7	84.1	26.5	314	61.9	20.5	182	0.18	10	16.4	1	0	3	3	23.7332	10.868	0.9134	117.77	24.16	3.9897	15.642	0.6762	3.121	99.996
686	2	71	1	0	3	200	200	0	0	2	0	100	4.2	0.9	0.6	2.6	0.1	0	20.2	14.2	63	2.1	0.5	4.19	131	40.3	96.3	31.4	325	46	13.2	134	0.12	8.8	16.3	2	1	2	3	20.9572	10.865	0.9137	117.573	25.7018	3.2605	16.466	0.7033	3.384	88.002
816	2	64	1	1	4	170	170	1	0	1	0	100	6	0.9	0.5	4.6	0	0	15.2	7.5	76.5	0.5	0.3	4.33	136	40.1	92.6	31.4	340	59.2	17.6	232	0.24	10.2	16.5	2	2	1	3	23.2834	9.8	0.85	118.7	23.6	4.43	16.9	1.59	5.6	113.4
87	1	65	4	0	3	800	200	1	1	1	0	100	3	1.6	1	0.3	0.1	0	55.2	33.6	9	1.7	0.5	4.18	139	41.1	98.4	33.3	338	54.5	15.2	84	0.1	11.7	17.4	0	1	0	3	21.9713	11.8	1.03	95.4	24.8	2.43	16.3	0.73	2.7	76
261	1	61	5	0	2	1000	200	1	1	1	0	100	3.4	0.9	0.4	2.1	0	0	27.6	10.4	60.9	1.1	0	4.2	119	37.2	88.5	28.3	320	58.6	18.3	168	0.17	9.9	16.2	1	0	0	3	20.9343	10.9	0.91	117.2	26.4	1.75	16.8	0.34	2	76.4
792	2	73	3	1	3	300	100	0	0	2	1	100	3.9	1.3	0.3	2.2	0.1	0	33.2	6.5	57	3.2	0.1	3.69	112	34.1	92.3	30.3	328	66.6	19.7	117	0.1	8.6	15.7	1	2	0	3	29.2969	10.877	0.9135	117.523	24.586	2.9159	16.595	0.5815	2.885	96.778
752	1	77	3	0	3	600	200	0	0	2	0	100	4	2.1	1.3	0.4	0.2	0	52.7	31.85	11	4.3	0.2	3.52	105	32.2	91.4	29.6	326	61.8	17.7	28	0.03	9.9	17	1	2	0	3	24.3025	11.6	0.98	103.3	26.2	3.26	16.7	0.57	2.5	86.5
138	1	51	5	0	4	1000	200	0	1	1	1	100	3	0.7	0.4	1.9	0.1	0	24.2	12.3	61.9	1.5	0.1	4.67	133	40.3	86.2	28.4	330	53.1	17	160	0.16	10.1	16.3	1	1	1	3	22.4913	11.1	0.93	115.1	27.7	3.41	15.8	0.2	1.4	85.6
266	1	39	4	0	4	600	150	0	1	1	0	100	11.2	1.3	0.8	9	0.1	0.1	6.9	79.8	11.5	1.2	0.6	3.57	113	34.4	96.4	31.7	328	62.8	17.9	239	0.26	10.7	16.3	1	2	0	3	18.5135	10.9	0.91	117.2	25.9	4.57	15.8	0.32	2	95.7
216	1	56	6	0	4	900	150	0	1	1	0	100	8	1.7	0.4	5.8	0.1	0	20.7	5.4	72.4	1.4	0.1	4.21	124	38.1	90.5	29.4	325	52.6	15.9	190	0.18	9.6	15.9	2	1	1	3	26.2346	11.4	0.96	107.1	28	5.53	15.9	0.7	3.3	76.7
31	2	59	4	1	3	800	200	0	1	1	0	100	3.5	2	1.2	0.3	0	0	55.9	34.9	7.9	1	0.3	3.41	112	32	94	32.8	349	67.8	19.5	63	0.09	14.8	16.5	1	1	0	3	26.398	11.3	0.98	101.9	23.8	3.93	19.6	0.33	1.1	115.5
382	2	68	6	1	3	720	120	0	1	1	0	100	4.1	1	0.6	2.5	0.1	0	24.1	13.8	60.4	1.4	0.3	3.8	125	37.5	98.7	32.8	333	78.1	21.8	106	0.1	9.1	16	1	2	0	1	27.7344	9.4	0.78	158.3	22.7	4.22	17.1	0.81	3.3	118.4
248	1	70	6	0	3	1200	200	0	1	2	1	100	5.2	0.7	0.4	3.7	0.5	0	13.2	6.8	70.6	9.3	0.1	4.27	127	39.2	91.9	29.7	324	49.2	14.6	179	0.14	8	15.6	2	1	0	3	23.8754	11.1	0.93	115.1	30.6	5.81	14.6	0.32	2.1	95.1
260	1	61	2	0	3	380	190	0	1	1	0	100	4.9	0.9	0.5	3.3	0.2	0	18.2	11	66.2	4.5	0.1	4.06	133	39.7	97.9	32.7	335	57.4	15.9	222	0.2	9.2	15.8	1	1	0	4	26.2976	10	0.83	139.6	25.3	2.42	17.2	0.51	2.4	82.6
777	1	77	1	1	4	120	120	0	0	2	1	100	3.5	0.2	0.3	2.8	0.1	0	5.8	9	81.6	2.9	0.7	2.16	81	23.5	109	37.3	345	79.1	20	164	0.15	90	16.2	3	3	3	2	17.9688	11.9	1.01	97	24.6	2.92	15	1.26	5.2	108.5
545	1	60	4	0	4	560	140	1	1	1	0	100	2.9	1.2	0.4	1.3	0.1	0	41.8	12.5	42.8	2.3	0.6	4.34	131	39.1	90	30.2	335	46.9	14.3	134	0.15	11.2	16.3	2	1	2	2	22.4913	11.1	0.94	111	26.5	3.12	15.9	0.39	3	88.6
486	1	70	5	0	4	800	160	1	1	2	0	100	4.2	1.1	0.6	2.5	0.1	0	25.5	13.8	58.9	1.3	0.5	3.1	110	32.1	103.6	35.3	343	70.9	18.8	172	0.16	9.4	16.1	3	3	1	3	22.0386	11.1	0.94	111	25.5	2.7	16.2	2.58	7.9	82.2
64	1	70	1	0	2	200	200	1	1	2	0	100	5.2	2.7	1.7	0.6	0.2	0.1	52.6	31.9	10.8	3.6	1.1	3.52	96	29.7	84.4	27.2	323	49.8	16.3	152	0.12	8.1	16.1	2	0	0	3	24.0238	10.8	0.94	107	24.4	3.29	17.9	1.2	4.9	90.8
211	2	62	1	0	2	150	150	1	1	4	0	90	2.6	1.6	0.3	0.6	0.1	0	60.7	10	24.6	3.8	0.9	3.76	116	35.1	93.3	30.7	330	53	15.8	110	0.13	11.4	16.3	1	0	0	4	15.8222	10.7	0.9	121.7	26.8	1.94	21.1	1.12	5.4	99.3
650	2	51	2	1	2	360	180	0	0	1	1	90	4.9	0.8	0.6	3.4	0.1	0	16.3	12.3	68.9	2.2	0.3	4.46	138	42.7	95.8	31	323	46.3	13.4	135	0.12	8.9	16.2	1	0	0	3	25.2174	10.865	0.9143	117.528	25.219	3.2467	16.64	0.7311	3.235	95.024
240	1	60	4	1	4	800	200	0	1	1	0	100	4.3	1.2	0.3	2.6	0.1	0	28.7	8	61.2	1.9	0.2	3.29	103	31.8	96.8	31.2	324	55.6	15.8	151	0.13	8.5	15.9	0	2	1	1	20.5693	11	0.92	115.1	24.5	3.62	15.3	15.45	41.3	84.5
452	2	72	10	0	4	1200	120	0	1	2	1	100	3.7	1.1	0.3	2.2	0.1	0	30.5	7.2	59.3	2.3	0.7	3.78	128	37.6	99.6	33.8	340	44.2	12.2	70	0.08	11.6	17	1	1	0	3	22.0317	10.8	0.9	119.2	26.7	3.02	19.2	0.68	3	88.2
110	1	72	4	0	4	800	200	1	1	2	1	100	5.9	1.7	0.6	3.5	0.2	0	28.9	9.3	58.9	2.8	0.1	4.83	168	49.4	102.3	34.8	340	48.9	13.2	153	0.17	10.9	16.9	2	2	1	3	19.3698	10.1	0.84	133.3	27.7	2.99	17.9	1.24	4.6	75.6
513	2	67	2	1	3	240	120	0	1	1	0	100	7.8	2	0.6	5	0.1	0	26.2	7.3	64.5	1.6	0.4	4.71	147	44.2	93.8	31.2	333	49.9	14.9	243	0.23	9.5	15.9	0	1	0	4	22.8928	11.075	1.9692	95.881	117.148	3.2219	18.627	0.7796	3.097	100.488
721	1	57	3	0	4	600	200	0	0	1	1	100	4.6	1.8	0.6	2	0.2	0	39.4	12.3	43.1	4.5	0.7	4.4	140	42	95.4	31.8	333	62.7	17.9	113	0.1	8.8	16	1	0	0	3	24.4898	10.5	0.88	123.7	26.2	2.01	18.3	0.4	2.3	81.3
343	1	53	3	0	2	600	200	0	1	1	1	100	4	1.4	0.4	2.1	0.1	0	33.7	10.5	52.5	2.9	0.4	4.82	145	43.1	89.5	30.1	336	574.6	18	131	0.127	12.9	16.2	1	0	0	2	22.3094	10.8	0.9	121.7	24.2	1.95	17.4	0.61	2.6	93.6
384	1	65	11	0	4	2288	208	0	1	1	0	100	5.4	1.5	0.5	2.9	0.5	0	27.8	8.6	53.9	9.1	0.6	2.96	112	34	114.8	37.7	329	76.6	18.2	124	0.1	8.3	16.2	3	3	1	3	22.0386	11.3	0.95	109	27.6	4.45	15.3	0.73	2.8	87.3
357	2	60	4	0	3	800	200	1	1	1	0	100	2.3	1	0.2	1	0.1	0	44	10.3	41.5	2.8	1.4	3.24	101	31	95.6	31.2	326	88.3	25.1	127	0.11	8.7	15.9	2	2	0	2	26.0262	10.874	0.9126	117.261	24.4538	2.66799	16.2199	0.6644	3.146	86.825
140	2	68	2	1	3	240	120	0	1	1	0	100	4.8	0.5	2.9	1.3	0.1	0	10.5	60.9	26.9	1.5	0.2	4.96	130	39.6	79.9	26.2	328	48.5	17.6	187	0.16	8.8	15.6	1	2	0	1	27.3438	9.3	0.77	161.7	22	3.09	16.1	0.87	3.9	117.7
369	1	67	5	1	3	600	120	0	1	1	0	100	3.3	0.4	0.3	2.5	0.1	0	12.9	9.1	73.9	3.6	0.5	3.56	98	30.1	84.6	27.5	326	47.5	15.4	177	0.14	8.1	15.8	2	0	0	3	20.0474	10.9	0.91	117.2	26.8	3.48	15.6	0.9	3	92
40	1	72	1	0	2	180	180	0	1	2	0	100	3.8	2.2	1	0.3	0.2	0	58.5	25.4	9.1	6.4	0.6	3.76	118	35.2	93.6	31.5	336	53.9	15.9	163	0.14	8.9	15.8	2	0	0	3	20.202	10.7	0.93	108	23.8	2.39	18.8	1.14	4	76.6
552	1	58	6	0	4	900	150	0	1	1	1	100	3.4	1.1	0.3	1.8	0.2	0	33.6	8.2	53.4	4.5	0.3	4.25	149	44.5	104.7	35.1	335	56	14.6	86	0.1	12	16.8	1	1	0	3	26.0262	10.1	0.84	136.8	26.5	3.72	17.5	0.31	1.8	88
482	2	65	6	1	3	960	160	0	1	1	0	100	4.4	1.8	0.4	2	0.1	0	41.9	9.2	46.2	2.2	0.5	3.71	126	37.7	101.6	33.9	334	54.7	14.6	198	0.2	9.9	16.2	1	2	0	2	23.1111	10	0.83	138.5	23.6	2.59	16.6	0.54	2.5	93.4
817	1	55	3	0	2	600	200	0	0	1	0	100	4.1	1.5	0.4	2	0.1	0	38	10.7	48.6	1.7	1	3.96	105	33.6	85	26.7	314	80.7	25.9	216	0.24	9.4	16	2	0	0	3	26.9896	10.5	0.91	110.2	24.7	1.92	18.4	0.58	1.9	84.9
68	1	68	5	0	4	1000	200	1	1	1	0	100	5.7	3.1	1.9	0.6	0.1	0	53.7	33.5	10.1	2	0.7	4.55	123	38.2	84	27	322	47.6	15.6	95	0.12	12.8	16.3	1	1	0	3	20.8307	11.3	0.98	101.9	26.8	2.89	16.5	0.66	3	76.3
66	1	66	5	1	2	1150	230	1	1	1	0	100	5.4	3.8	1	0.4	0.2	0	71.2	17.7	7.2	3.3	0.6	3.49	110	32.2	92.1	31.6	343	72.7	21.3	124	0.13	10.3	17	0	0	0	3	25.4694	10.8	0.94	107	24	2.91	15.5	0.15	1	84.4
535	1	65	8	1	4	1200	150	1	1	1	0	100	5.1	1.6	1	2.4	0.1	0	30.9	18.9	47.8	2	0.4	3.66	101	32.2	88.1	27.7	314	58.4	18.2	86	0.07	8.4	15.6	2	2	3	3	23.6713	12.6	1.07	88.2	25.2	2.69	15.6	0.42	1.8	75.2
683	1	57	1	1	3	180	180	0	0	1	0	100	5.4	1.8	0.7	2.4	0.4	0	34	13.6	44.9	7.1	0.4	4.58	143	45.2	98.7	31.3	316	73.1	19.4	129	0.12	9.4	16.6	2	0	0	2	28.075	10.9	0.91	119.4	23.7	2.13	17.6	0.35	2.5	88.2
24	1	67	3	0	4	600	200	1	1	1	0	100	6.4	3.9	1.9	0.4	0.2	0	29.5	6.1	61.5	2.6	0.3	4.32	155	45.4	105.1	35.8	341	52.1	13.5	95	0.12	12.4	16.5	2	1	0	1	23.6614	10.7	0.93	108	30.1	3.37	16.7	0.39	1.3	90
637	1	51	1	0	2	120	120	0	0	1	1	100	4.4	0.4	2.2	1.7	0.1	0	8.9	49.3	38.1	3.2	0.5	3.93	117	35.6	90.5	29.7	329	67.3	20.4	143	0.15	10.6	15.8	1	0	0	2	22.0386	11.1	0.93	113	25.1	2.4	18.3	1.39	6	87.5
443	2	44	1	0	3	200	200	0	1	1	0	100	4.6	1.4	0.6	2.5	1	0	31.4	12.2	54.2	2	0.2	4.16	122	37.8	90.9	29.5	323	47.7	14.5	272	0.26	9.6	15.5	0	2	0	2	30.385	10.2	0.85	133.3	23.9	3.09	15.2	0.48	2.5	99.3
67	1	72	5	0	2	900	180	0	1	2	0	100	3.8	2	1.2	0.5	0.2	0	52.4	30.1	13.2	4	0.3	4	136	0.14	100.7	34	337	52	14.3	135	0.14	10.5	16.6	2	0	0	3	20.202	11.5	1	100	25.6	2.65	17.7	1.22	4.9	76.1
784	1	59	3	1	4	600	200	0	0	1	0	90	4.3	1.6	0.6	1.9	0.2	0	36.8	14.85	43.5	4.4	0.5	4.72	139	42.1	89.1	29.5	330	45.3	13.8	201	0.19	9.6	16.2	0	1	1	1	29.4118	11	0.92	115	24.5	2.05	16.5	0.14	1.3	71.8
621	1	56	1	0	4	200	200	0	0	1	0	90	4.6	2	1.9	0.5	0.1	0	44	42.5	10.4	2.3	0.8	4.3	135	40	93.1	31.3	338	52.4	15.6	246	0.25	10.8	16.3	0	0	1	3	20.4082	9.6	0.83	121.3	23.3	3.17	18	1.39	5.4	99.4
811	2	49	2	0	2	300	150	0	0	1	1	100	6.5	2.4	0.3	3.7	0.1	0	36.7	4.9	56.8	1.3	0.3	4.05	127	38	93.8	31.4	334	56	16.6	214	0.2	9.6	15.9	1	0	3	3	22.6562	10	0.83	138.5	23.9	2.39	17.2	4.3	13.1	101.3
200	2	64	4	0	3	720	180	1	1	1	0	100	4.5	1.7	0.5	2	0.2	0	38.6	12	45.4	3.4	0.6	3.7	132	39	105.4	35.6	338	65.4	17	133	0.15	11.1	16.2	1	1	0	3	22.7732	10.5	0.88	126.5	24.1	3.13	17.3	1.46	5.3	77
644	1	48	6	1	3	1020	170	0	0	1	0	100	4	0.5	1.9	1.2	0.3	0	13	47.2	31	8.2	0.6	4.03	119	34.6	85.8	29.4	344	38.5	12.8	159	0.16	9.7	16.1	2	2	2	1	27.4587	10.3	0.86	131.5	24.8	2.9	16.2	1.51	6.3	105.2
689	1	57	1	0	4	200	200	0	0	1	1	100	5.6	1.6	0.6	3.3	0.2	0	28.6	9.8	58.7	2.6	0.3	4.15	139	41	98.9	33.4	339	46.8	12.9	215	0.22	10.3	16.2	1	1	1	3	24.4898	10.1	0.84	136.8	28.2	2.64	17	0.18	2	96
412	1	61	5	0	3	1000	200	1	1	1	0	100	3.5	1	0.4	2.1	0	0	28	12.3	58.4	1.1	0.2	3.86	134	39.9	103.4	34.6	336	52.6	14	126	0.12	9.8	16.3	0	1	0	2	23.7118	11.6	0.98	103.3	25.9	2.26	17.3	0.31	3	76.1
251	2	67	3	0	4	480	160	0	1	1	0	100	4	2.2	0.4	1.3	0.1	0.1	54.5	9.6	32.6	2	1.3	4.11	129	38.6	94	31.4	334	64.2	18.8	178	0.19	10.4	16.2	1	2	3	3	19.7239	10	0.83	142.4	27.4	2.74	16.3	0.89	3.2	98.3
544	2	63	1	0	4	130	130	0	1	1	0	100	3.4	0.8	0.3	2.3	0.1	0	22.7	7.9	673	1.4	0.7	3.73	94	30	80.5	25.2	313	68.5	23.4	79	0.07	8.9	15.4	1	1	1	3	22.8928	10.878	0.9125	139.605	25.445	3.6623	16.87	0.77825	3.167	85.4584
540	1	19	4	0	3	400	100	1	1	1	1	100	4.1	2	0.4	1.7	0.1	0	47.8	10.6	40.1	1.5	0	4.49	143	42.7	95	31.8	335	60	17.3	190	0.17	9	15.8	1	1	0	1	17.3589	11.9	1.01	98.1	27.1	1.51	17.8	0.29	2.2	87.9
734	1	47	5	1	3	700	140	0	0	1	1	100	3.7	1	0.3	2.4	0.1	0	26	7.3	64	2.1	0.6	4.26	111	35.1	82.4	26.1	316	59.7	19.9	145	0.14	9.7	16.1	0	2	0	2	20.7612	10.1	0.83	139.6	23.9	3.54	15.9	0.47	2.3	111.4
638	1	51	2	0	2	240	120	0	0	1	1	100	3.8	0.5	2	1	0.2	0	14.2	51.9	27.1	6.4	0.4	3.84	122	36.2	94.3	31.7	337	45.4	13.1	189	0.19	9.4	15.9	1	0	0	2	22.0386	10.9	0.91	117.2	25.4	2.52	16.6	0.32	1.8	98.9
584	1	61	7	1	4	910	130	0	1	1	0	100	8.2	1.3	0.5	5.9	0.4	0	16	5.7	72.8	5	0.5	4.16	140	40.9	98.2	33.5	342	45.6	12.8	129	0.12	9.4	16.1	0	3	1	3	17.9089	10.3	0.86	128.3	26.8	2.42	19.5	4.51	9.2	107.8
457	2	67	5	0	4	800	160	0	1	1	0	100	4	1.8	0.3	1.8	0.1	0.1	44.3	7.5	45	2	1.2	3.84	127	37.9	98.7	33.2	335	57.9	16	175	0.18	10.5	16.3	1	2	3	3	19.8791	10.1	0.84	136.8	25.7	3.64	15.2	0.77	3.3	100.7
826	1	68	3	1	3	450	150	0	0	1	0	100	14.2	1.3	0.7	12	0.1	0	9.5	5	84.5	0.7	0.3	4.26	121	35.8	84.1	28.4	338	54.2	17	155	0.14	8.9	15.5	1	2	0	3	24.3375	10.2	0.88	113.7	26.2	4.31	16	2.02	7.1	93.3
724	1	54	10	1	4	1500	150	0	0	1	0	100	4.4	0.8	0.5	3	0.1	0	17.2	12.1	68.5	2	0.2	4.19	133	40.9	97.5	31.7	325	49.4	13.8	160	0.14	8.8	16.5	1	2	1	3	24.2701	11	0.92	115	25.5	4.32	16.5	1.32	5.6	82.1
690	1	54	9	1	4	1350	150	0	0	1	0	100	5.9	1.6	0.3	3.8	0.1	0	27.6	5.8	65.1	1.3	0.2	4.13	131	38.9	94.2	31.9	337	42.8	12.4	125	0.15	11.7	16.6	1	2	1	3	24.2701	11.4	0.96	107.1	26.6	2.37	16.4	0.33	2.8	97.5
97	2	56	4	0	3	800	200	0	1	1	0	100	9.3	0.6	7.1	1.2	0.3	0.1	6.9	76.6	13.1	2.8	0.6	3.79	130	38.9	102.7	34.3	334	64.7	17.4	110	0.11	9.7	16.2	1	1	0	3	23.03	10.8	0.91	119.5	24.7	2.7	15.5	0.42	2.2	95.1
679	1	60	1	0	4	180	180	0	0	1	1	100	3.5	0.8	0.3	2.4	0.1	0	21.8	7.3	68.1	2.1	0.7	3.96	124	38.2	96.4	31.4	325	56.8	16	161	0.16	10.1	16.1	2	2	1	2	22.46	10.1	0.84	136.8	24.5	2.52	17.1	0.38	2.6	91.4
209	1	70	6	0	2	900	150	0	1	2	0	100	4.9	1.7	0.5	2.4	0.3	0	35.1	9.2	50.3	5.3	0.1	4.29	126	40.2	93.8	29.4	313	67.9	19	144	0.17	11.7	16.3	1	0	0	2	20.9366	11.3	0.95	109	26.2	2.25	17.7	0.39	2.4	81
441	1	68	10	1	4	1300	130	0	1	1	0	100	11.2	1.7	0.5	9	0	0	14.9	4.5	80.3	0.1	0.2	3.85	119	37.2	96.6	31	320	49.8	14.2	242	0.31	13.1	16.1	2	2	1	4	21.7193	10.3	0.89	112.5	22.8	2.42	16.6	0.28	2.2	87.1
378	1	34	4	0	4	780	195	0	1	2	1	100	4.3	1.6	0.3	2	0.3	0	36.4	8	47.4	8	0.2	4.88	140	42.7	87.6	28.7	328	103.1	32.1	184	0.14	7.6	15.3	3	3	1	3	16.7062	10.9	0.91	117.1	25.1	2.39	16.1	1.08	4.3	102.9
465	2	68	7	1	3	840	120	0	1	1	0	100	4.2	1.1	0.6	2.6	0	0	25.5	13	60.6	0.8	0.1	3.95	137	40.5	102.6	34.6	338	74.1	20.1	111	0.11	10.2	16.4	1	2	0	1	27.7344	10	83	139.6	22.7	3.82	18	0.59	2.2	127.6
426	1	71	5	0	3	1000	200	0	1	2	0	100	3.8	0.9	0.3	2.4	0.2	0	23.7	7.4	63.3	4.9	0.7	3.17	105	31.5	99.4	33.1	333	66.6	18.5	109	0.11	9.8	16.1	2	1	0	3	20.9573	10.9	0.94	105.9	27.2	3.05	16.7	1.07	3.8	86.6
751	2	37	1	0	4	100	100	0	0	4	1	100	2.4	0.8	0.3	1.3	0	0	31.8	10.8	55.4	1.4	0.6	3.49	91	29.4	84.3	26.2	310	59.3	19.4	223	0.2	8.8	15.8	3	3	1	2	15.5556	11.1	0.94	111	28.1	3.97	14.2	0.73	3.5	101.2
50	1	65	2	0	3	400	200	1	1	1	0	100	3	1.3	1.3	0.4	0.1	0	43.2	43.1	11.8	1.6	0.3	4.31	138	40.7	94.5	32	339	50.1	14.5	83	0.09	11	16.8	0	1	0	3	22.8164	11.8	1.03	95.4	26.3	2.4	16.6	0.84	3.3	79.1
363	2	60	5	0	2	950	190	1	1	1	0	100	4.2	0.7	0.3	3.2	0.1	0	15.7	7.6	74.7	1.6	0.4	3.3	102	32.2	97.5	31	317	60.1	16.9	123	0.14	11.6	17	1	0	0	3	24.5578	13.4	1.14	77.2	26.9	1.78	17	0.42	2.4	78.8
245	2	62	4	0	3	720	180	0	1	1	0	100	4.6	1.9	0.5	2.1	0.1	0	41.3	10.7	45.8	1.7	0.5	4.2	117	37.5	89.4	27.9	312	62.3	19.3	178	0.19	10.5	16	1	1	0	2	24.5675	10.6	0.89	124.1	25.6	2.73	17.4	0.23	2.6	100.2
79	2	72	4	1	2	720	180	1	1	2	0	100	3.7	1.9	1.4	0.3	0.1	0	51.2	36.7	9	2.7	0.4	3.58	111	32.7	91.3	31.2	341	68.1	20.2	88	0.09	10	16.6	1	0	0	3	21.2279	13.6	1.03	95	37.3	2.55	16.9	1.03	4	88
786	1	53	3	0	4	540	180	0	0	1	1	55	4	1.2	0.4	2.3	0.1	0	29	8.8	58.9	3	0.3	3.01	82	24.7	82.1	27.2	332	58.1	20.8	219	0.23	10.4	16.6	2	1	1	3	19.9432	12.2	1.04	92.5	21.2	2.3	15.7	1.13	4.3	97.9
205	2	56	6	0	3	1080	180	1	1	1	1	100	4.5	2	0.4	2.1	0	0	43.6	8.4	47.4	0.4	0.2	3.35	124	36.6	109.4	36.9	339	56.5	13.4	112	0.13	11.3	16.5	0	1	0	3	28.6667	10.7	0.9	121.7	25.4	2.44	17.2	0.63	3.1	94.4
825	1	68	4	1	3	600	150	0	0	1	0	100	6.6	1.4	0.8	4.2	0.2	0.1	20.6	11.8	64.4	2.3	0.9	4.46	123	36.6	82.1	27.7	337	47.7	15.4	167	0.15	9.2	15.8	1	2	0	3	24.3375	9.9	0.86	117.4	25.1	2.99	17.2	0.78	3.4	90.1
34	1	70	5	1	4	1000	200	0	1	2	0	100	6.4	4.8	1	0.4	0.2	0	74.4	15.8	6.8	2.7	0.3	4.28	130	39.1	91.2	30.4	334	56.7	16.9	186	0.21	11.3	16.2	1	1	0	2	21.3039	11.4	0.99	100.9	33.7	4.67	16.1	0.53	2.1	84.4
32	1	58	4	1	3	800	200	1	1	1	0	100	4	1.8	1.7	0.4	0.1	0	44.1	42.4	10.1	3.1	0.3	3.79	138	40.7	107.3	36.3	338	62.4	16	210	0.17	8.2	15.8	2	2	0	4	22.4001	12.1	1.05	91.2	23.6	3	19.2	0.86	3.2	89.4
810	1	60	2	0	3	400	200	0	0	1	1	100	6.5	1.6	0.6	4.3	0.1	0	24.8	8.4	65.3	1.1	0.4	4.49	143	42.3	94.1	31.8	338	62	18.4	144	0.16	10.9	16.7	1	2	0	2	28.6501	10.1	0.84	136.8	22.3	2.12	16.1	0.26	1.8	96.3
536	1	62	6	1	4	1200	200	0	1	1	1	100	2.8	1.3	0.2	1.3	0	0	45.5	7	45.8	1.3	0.4	2.75	95	28.1	102	34.4	338	69.2	18.52	126	0.11	8	16.2	3	3	1	3	19.3772	11.7	0.98	102	25.1	2.74	14.8	0.6666	3.082	84.165
617	1	48	1	0	2	180	180	0	0	1	0	100	4.3	2	1.7	0.3	0.3	0.1	46.5	39.2	7.5	5.7	1.1	4.12	129	39.1	94.9	31.3	330	49.7	14.5	211	0.24	11.6	16.5	2	0	0	3	23.3887	11.1	0.96	103.9	28.8	2.46	17.6	1.47	3	100.6
213	1	70	2	1	2	300	150	1	1	2	0	100	6	2.1	0.5	3.4	0.1	0	34.3	8.4	56.3	0.8	0.2	4.29	135	41.6	96.9	31.5	325	49.6	14	169	0.16	9.7	15.9	1	0	0	2	22.8571	11.2	0.94	111	26.2	2.7	16.4	0.55	3.5	77.4
219	1	56	3	0	4	450	150	0	1	1	0	100	8.7	1.6	0.5	6.5	0.2	0	18.1	5.4	73.9	2.2	0.4	4.8	139	42.7	89	29	326	49.4	15.4	216	0.19	9.8	16	2	1	1	3	26.2346	10.4	0.87	128.9	23.1	2.97	15.1	0.72	3.7	90.4
448	1	70	5	1	4	750	150	1	1	2	1	95	4	0.5	0.3	3.1	0.1	0	12.2	8	77.6	2	0.2	3.1	108	33.2	107.2	34.8	325	67.6	17.1	91	0.09	10.3	16.5	2	1	0	3	20.0474	10.877	0.9126	117.238	25.486	2.8649	16.457	0.7251	3.083	90.7447
212	2	60	4	0	2	760	190	1	1	1	0	100	3.1	0.6	0.3	2.1	0.1	0	20.1	8.9	68.1	2.6	0.3	3.48	110	34	97.7	31.6	324	69.1	19.3	109	0.13	11.7	16.9	1	0	0	3	22.4766	13	1.11	82	26.5	1.83	16.9	0.5	3	77
73	2	54	3	1	4	360	120	0	1	1	0	100	6.5	4	1.9	0.5	0.1	0	61.7	29.3	7.5	1	0.5	3.88	107	33.4	86	27.6	320	56.4	18.1	222	0.2	10.1	15.7	2	1	1	3	23.5556	9.8	0.84	118.7	24.5	2.43	17.3	0.78	2.4	82.6
78	1	55	2	0	3	400	200	1	1	1	0	100	4.8	3.3	1.1	0.3	0.1	0	68.1	23.6	6.2	1.9	0.2	3.9	136	38.3	98.2	34.8	355	61.1	16.6	118	0.14	11.9	16.9	2	1	0	3	25.6055	11	0.96	104.9	24.9	2.57	14.1	0.21	0.6	91.2
121	2	55	6	1	4	1080	180	1	1	1	0	100	5.8	1.8	0.7	3.1	0.1	0	31.9	11.2	54.2	2.4	0.3	4.19	133	42.5	101.5	31.8	313	53.1	14.3	224	0.22	9.7	16.2	3	3	1	3	21.2306	10.2	0.85	134.1	24.8	4.49	16.5	0.59	3.7	98.6
529	2	62	1	1	3	200	200	0	1	1	0	100	4.6	2.4	0.3	1.9	0.1	0	51	7	40.5	1.4	0.1	3.95	117	36.2	91.6	29.6	323	44.4	13.6	215	0.19	8.8	15.7	1	1	0	3	24.0346	10.859	0.9135	117.594	33.781	2.3876	16.586	0.739	3.291	103.788
301	1	70	2	0	4	320	160	1	1	2	0	100	5	2	0.5	2.5	0.1	0	39.8	9.3	49.3	1.1	0.5	3.91	122	36	92.1	31.2	339	50.7	15.3	221	0.19	8.7	15.7	3	3	1	2	22.5895	11	0.92	115.1	24.3	2.9	17.1	3.63	11.1	108.9
366	1	64	2	1	4	260	130	0	1	1	0	100	6.4	1.4	0.4	4.5	0.1	0	21.6	6.5	70.3	1.4	0.2	3.81	98	30.8	80.8	25.6	318	51.2	17.4	178	0.16	9.2	15.8	3	3	1	4	23.5078	10.8	0.9	119.5	23.9	3.48	16	0.6	2.5	86.5
156	2	70	6	0	4	900	150	0	1	2	0	100	6.9	2.9	0.8	3.1	0.1	0	42.5	11	45	1.2	0.3	4.68	145	43.3	92.6	31	335	58.1	17.3	185	0.19	10.1	15.9	1	1	1	3	27.5556	10.4	0.86	131.5	20.6	3.54	15.3	1.96	6.9	91.9
292	2	68	3	1	3	360	120	0	1	1	0	100	4	1.2	0.5	2.3	0.1	0	29.4	13	56.2	1.2	0.2	4.31	134	40.6	94.1	31	330	90.2	26.5	133	0.13	9.5	16.3	1	2	0	1	26.079	9.5	0.78	158.2	20.8	3.44	17.1	0.98	3.9	122.7
413	1	59	3	0	4	450	150	0	1	1	0	100	3.8	0.7	0.2	2.8	0.1	0	18.6	5.5	72.4	2.7	0.8	3.75	130	38.8	103.4	34.6	335	47.8	12.7	122	0.15	12.2	16.7	3	3	1	3	22.4913	11.5	0.96	105.5	26	2.39	15.6	0.23	1.7	80.6
356	2	60	5	0	3	1000	200	1	1	1	0	100	2.2	0.9	0.2	1	0.1	0	41.5	10.2	45	2.6	0.7	3.16	100	31.4	99.5	31.6	318	81.7	22.3	107	0.09	8.7	15.9	2	2	0	2	26.0262	10.88	0.9127	117.323	24.295	2.57347	16.056	0.679	3.124	88.876
267	1	48	9	1	3	1530	170	0	1	1	0	100	5.4	1.7	0.5	3.1	0.1	0	31.9	8.8	57.6	1.1	0.6	4.69	138	42	89.6	29.5	329	48.4	14.8	101	0.11	10.4	16.1	2	2	2	1	27.4587	10.6	0.89	124.1	24.5	3.56	17.7	0.39	2.2	106.9
528	1	78	3	1	4	360	120	0	1	2	0	100	3.4	1.5	0.4	1.4	0.1	0	43.1	12.7	41.9	1.9	0.4	4.36	124	37.3	85.6	28.5	332	43.6	14.1	80	0.06	7.7	15.4	3	3	1	3	22.8625	10.877	0.9143	117.673	24.4258	2.5714	17.005	0.8383	3.261	95.143
320	1	70	4	1	4	600	150	1	1	2	1	95	3	0.6	0.3	2	0.1	0	20	8.5	66.6	4.1	0.8	3.03	104	31.7	104.5	34.3	328	54.2	14.4	87	0.09	10.6	16.4	2	1	0	3	19.2121	10.6	0.89	124.1	25.3	2.41	16	3.87	12.2	86.4
688	1	57	2	0	4	400	200	0	0	1	1	100	3.8	1.2	0.2	2.2	0.1	0	32.3	6.5	58.6	2.2	0.4	3.64	104	31.4	86.3	28.6	331	51.5	16.2	187	0.16	8.7	15.7	1	1	0	3	24.4898	11.5	0.97	105.2	26.7	2.46	16.1	0.56	4.5	70.8
747	1	66	6	0	2	780	130	0	0	1	1	100	1.4	0.6	0.3	0.3	0.1	0	47.4	25	19.7	6.6	1.3	3.85	108	33	85.6	27.9	327	51.6	16.7	168	0.16	9.3	16.2	2	2	0	2	24.3046	11.4	0.96	107.1	23.2	2.12	16.3	2.59	8.4	76.7
629	1	37	1	0	4	120	120	0	0	1	0	100	2.8	0.3	1.3	1.1	0.2	0	8.8	44.8	40.1	5.9	0.4	4.17	109	33.9	81.2	26.1	322	46.3	15.7	173	0.15	8.9	16.1	3	3	1	2	21.1463	10.8	0.91	119.5	24.2	3.47	14.3	0.51	2.8	92.2
175	1	70	3	1	4	450	150	1	1	3	1	85	4.3	0.6	0.3	3	0.3	0	14.5	6.9	71.7	6.5	0.4	3.2	111	33.7	105.4	34.6	329	51.5	13.3	135	0.13	9.8	16.3	2	1	0	3	19.3792	10.7	0.9	121.7	27.3	3.62	16.3	1.68	6.8	85.3
6	2	61	1	0	2	200	200	0	1	1	1	100	4.4	2.1	1.6	0.5	0.2	0	47.1	36.7	11.2	4.3	0.7	3.83	120	34.6	90.4	31.2	346	41.1	12.9	180	0.15	8.2	15.4	2	0	0	3	22.5827	10	0.87	116.1	25.9	2.65	15.8	0.34	2.6	98.2
55	1	72	4	0	2	720	180	0	1	2	0	100	4.3	2.6	1	0.5	0.2	0	60.2	23	10.9	5.2	0.7	3.97	134	39.9	100.5	339	337	50.2	13.7	143	0.15	10.3	16.5	2	0	0	3	20.202	10.5	0.91	110.2	23.6	2.25	17.3	0.78	2.6	83.2
779	1	67	1	1	4	150	150	0	0	1	0	100	4.6	1.3	0.4	2.9	0.1	0	28	8	61.3	2.2	0.5	3.35	92	29.5	88.2	27.5	312	76.6	25.3	131	0.12	9.1	16.1	2	1	1	4	20.8086	10.1	0.84	136.8	22.1	2.94	15.2	0.72495	3.131	90.959
255	1	57	2	0	4	300	150	0	1	1	0	100	5.4	1.7	0.6	2.9	0.2	0	31.5	11.3	53.8	2.8	0.6	4.18	135	40.7	97.4	32.4	332	63.6	17.9	112	0.12	10.9	16.3	1	1	1	3	22.8374	10.8	0.9	121.7	23.6	2.56	16.1	0.64	3.6	84.9
590	1	65	4	1	4	560	140	1	1	1	0	100	4.8	1.1	0.5	3	0.2	0	23.2	9.6	63.2	3.1	0.9	4.06	120	37.7	92.5	29.5	318	52.3	15.6	191	0.18	9.3	16.1	2	1	1	3	17.3745	10.3	0.86	131.5	24.2	3.54	15.9	0.74	4.3	106.5
616	2	40	5	0	2	1000	200	0	0	1	0	100	4.5	3	1.1	0.3	0.1	0	67.4	23.9	6.7	1.6	0.4	3.56	99	30.9	86.8	27.9	321	58.3	18.6	117	0.16	13.7	16.4	2	0	0	2	31.051	10.3	0.89	112.5	25.6	2.46	15.2	0.29	1.4	98.1
98	2	56	5	0	3	1000	200	0	1	1	0	100	25.9	1.3	1.4	22.7	0.4	0	4.9	5.5	87.8	1.6	0.2	3.53	123	37.3	105.9	34.8	329	70	18.3	91	0.08	8.9	16.1	1	1	0	3	22.8529	10.4	0.86	131.5	25.8	2.79	16.6	0.37	1.8	96.3
395	2	61	11	1	4	1650	150	1	1	1	1	100	2.4	1.2	0.2	0.9	0.1	0	50.7	9	36.9	3	0.4	3.62	117	34.4	94.9	32.2	340	60	17.7	106	0.1	9.1	16.1	2	1	1	2	22.6562	10.8	0.9	1199.5	22.8	2.54	16	0.64	3.1	90.7
77	1	63	5	0	4	1150	230	1	1	1	0	50	4.6	2.2	1.9	0.4	0	0	48.9	41.5	8.7	0.7	0.2	4.03	137	40.1	99.6	34.1	343	62.1	17.3	114	0.1	9.4	16.2	1	1	1	2	18.3391	10.7	0.93	108	23.9	3.52	18	2.19	6.6	110.3
614	1	55	4	0	2	800	200	0	0	1	0	90	3.3	1.9	1	0.4	0.1	0	56.7	30.9	10.4	1.5	0.5	3.97	109	34.1	85.9	27.4	319	60.3	19.3	191	0.17	9.5	15.9	2	0	0	3	26.9896	10.4	0.9	111.4	25.3	2.01	17.1	0.27	1.2	88.1
645	1	53	1	0	2	200	200	0	0	1	1	100	5	0.3	2.5	1.9	0.2	0	6.4	50.4	38.9	3.6	0.7	3.85	118	35.6	92.5	30.6	331	54.3	16	196	0.21	10.7	15.8	1	0	0	2	22.4913	10.864	0.9138	117.675	25.689	3.06499	16.734	0.7393	3.196	98.291
794	2	68	2	1	2	280	140	0	0	1	0	100	2.7	1.4	0.4	0.9	0	0	50.1	14.6	33.2	1.4	0.7	4.39	110	34.5	78.5	25.2	319	77.3	27.6	177	0.15	8.5	15.3	1	0	0	3	20.0777	10.6	0.89	121.4	21.9	2.6	15.4	4.17	12	105.9
337	1	67	4	0	3	720	180	0	1	1	0	100	3.7	0.7	0.4	2.3	0.2	0	19.8	11.8	62.3	5.5	0.6	4.06	115	35	86.3	28.4	329	44.3	14	209	0.2	9.5	15.9	2	2	0	3	19.9481	10.4	0.87	128.9	24.5	3.06	16.3	0.47	3.1	93.9
623	1	77	1	0	4	130	130	0	0	2	0	90	4.5	2.6	1.1	0.4	0.4	0	47.9	40.7	8.1	8	0.4	4.71	143	42.2	89.6	30.4	339	43.8	13.5	175	0.15	8.3	15.7	2	2	1	3	23.5615	10.1	0.87	114.9	27.1	2.82	16.3	0.98	3.9	88.9
445	2	66	2	1	4	360	180	1	1	1	1	100	3	1.2	0.3	1.4	0.1	0	40.9	8.9	46	3.7	0.5	4.01	114	34.9	87.1	28.4	327	78.2	25	181	0.19	10.7	15.7	3	3	1	3	20.4467	10.6	0.89	121.4	25.3	2.5	15.8	4.47	12.9	101
760	1	53	2	0	4	360	180	0	0	1	1	85	4	1.2	0.4	2.2	0.1	0	30.6	11	55.7	2.3	0.4	2.93	80	23.7	81	27.1	338	40.7	14.6	1776	0.78	10.4	16.7	2	1	1	3	19.9432	12	1.02	95.5	21.12	2.23	15.6	1.52	5.4	91.4
85	2	61	1	0	2	200	200	0	1	1	0	100	5.2	2.4	1.9	0.4	0.4	0	47	37.5	7.3	7.7	0.5	4.08	127	35.7	87.4	31	355	43.8	13.5	263	0.23	8.8	15.8	2	0	0	3	22.5827	10.9	0.95	105.9	24.4	2.61	18.2	0.3	1.3	89.2
11	1	65	1	1	3	150	150	0	1	1	0	100	2.2	0.5	1.2	0.4	0.1	0	21.1	56	18	4.1	0.8	4.47	117	35.1	78.5	26.1	332	47.8	16.8	299	0.29	9.8	15.9	1	2	0	3	23.8087	11.3	0.98	101.9	24.5	2.73	17.9	0.42	1.1	85.6
232	2	50	6	0	2	1080	180	0	1	1	0	100	5	2	0.3	2.6	0.1	0	40.3	5.8	51.7	1.5	0.7	4.21	129	38.7	91.9	30.6	333	42.3	12.7	337	0.29	9.7	15.9	0	1	0	3	21.7738	10.2	0.85	134.1	26	2.56	16.2	0.43	2.4	91.4
111	1	66	3	0	3	600	200	0	1	1	1	100	4.2	1	0.4	2.7	0.2	0	23.4	8.8	63.1	3.8	0.9	3.82	119	36	94.3	31.1	331	55.5	16.1	175	0.15	8.8	15.7	2	1	0	3	25.7657	10.8	0.9	119.2	28.7	2.85	16.3	0.36	1.8	73.4
297	2	76	3	0	4	300	100	0	1	2	0	95	7.2	2	0.8	4.1	0.3	0	27.4	10.4	57.4	4.4	0.4	3.69	121	36.8	99.6	32.7	329	54.2	14.8	162	0.17	10.7	16.3	3	3	1	2	25.3331	10.5	0.88	126.5	22.7	2.68	16.8	0.5	2.1	85.1
694	1	60	3	1	4	375	125	0	0	1	0	100	4.9	1.7	0.5	2.4	0.2	0	34.8	10.8	49.3	4.6	0.5	3.9	130	39.2	100.6	33.3	332	48.4	13.2	233	0.23	9.7	15.8	2	2	1	1	27.9431	10.4	0.87	128.9	26.2	3.07	15.7	0.23	1.8	95
293	2	72	4	1	4	780	195	0	1	2	1	90	5	0.4	2.6	1.5	0.4	0.1	7	52.2	30.5	8.9	1.4	3.83	107	32.7	85.3	27.8	327	52.1	17.2	259	0.21	8.8	15.7	3	3	1	2	24	10.2	0.84	136.8	24.8	2.7	15.1	0.94	3.5	100.8
813	1	67	2	1	4	300	150	0	0	1	0	100	4.7	1.4	0.4	2.8	0.1	0	30.5	8	58.8	2.4	0.3	3.17	99	29.1	91.9	31.1	340	101.9	31.2	97	0.09	8.8	15.9	2	1	1	4	20.3131	10.7	0.89	121.4	24	2.79	17.2	0.77	3.6	80.1
332	1	56	1	1	4	240	240	0	1	1	1	95	7.3	4.7	1.6	0.8	0.1	0	64.8	22	11.1	1.8	0.3	3.72	109	33	88.6	29.4	332	76.5	23.8	96	0.1	10.1	16.5	3	2	1	3	21.7993	10.881	0.9138	117.708	25.597	3.5379	16.039	0.6407	3.145	91.033
119	2	54	4	1	4	720	180	1	1	1	0	100	5.2	1.9	0.6	2.6	0.1	0	35.9	11.1	50.1	2.7	0.2	3.91	126	38.8	99.3	32.2	325	53.1	14.7	272	0.22	9.4	16.1	3	3	1	3	21.2306	10.1	0.83	139.6	25.6	3.07	16.3	0.29	1.7	86.6
659	1	53	4	1	4	600	150	0	0	1	0	100	5.1	1.7	0.5	2.8	0.1	0	34.1	9.1	55	1.5	0.3	4.93	141	43.8	88.8	28.6	322	49.5	15.2	136	0.14	10.1	15.8	1	2	1	3	24.093	10.6	0.89	124.1	26.2	3.76	16.8	0.27	1.6	112.4
624	1	62	1	0	3	120	120	0	0	1	0	100	5.1	1.4	0.6	2.9	0.2	0	28.2	11.5	56.4	3.4	0.5	3.79	128	38.4	101.2	33.9	333	48.2	13.1	283	0.25	9.3	15.8	0	1	0	3	21.2245	10.7	0.9	121.7	26.2	3.67	14.6	0.35	2	104.7
30	1	63	2	0	4	436.8	218.4	0	1	1	0	100	6.1	3.5	1.7	0.7	0.1	0	57.5	27.9	11.7	57.5	2.4	0.5	4.34	148	41.8	96.4	34	353	45	13.1	246	7.7	15.5	3	2	1	3	19.5918	11.4	0.99	100.9	30.1	3.67	17	0.21	1.1	112.7
502	2	42	6	0	3	1140	190	0	1	1	0	100	3.6	1.1	0.2	2.3	0	0	30	5.7	63.1	1	0.2	3.46	105	32.5	93.9	30.2	323	57	16.6	195	0.17	8.9	15.4	1	1	0	2	19.9481	10.3	0.85	130.8	25.7	1.33	18.2	0.56	3	90
454	2	62	3	0	2	450	150	1	1	4	0	100	2.8	1.3	0.3	1.1	0	0	47.6	10.4	39.9	1.4	0.7	3.4	109	33.1	97.4	32	329	53.4	15	91	0.122	12.9	17	1	0	0	4	15.4297	9.9	0.83	138.6	22.3	1.9	16.8	4.74	13.1	96.4
423	1	69	8	0	4	1600	200	1	1	1	0	100	5.7	1.7	0.4	3.6	0.1	0	29.3	6.9	61.9	1.5	0.4	4.55	119	37	81.4	26.1	322	53.8	18.5	110	0.14	12.5	16.5	1	1	1	3	20.5151	12.7	1.11	83.5	29.6	4.31	15.7	0.31	2.5	78
418	1	56	13	1	4	3120	240	0	1	1	1	95	10.4	0.8	1	8.6	0	0	8	9.2	82.6	0.1	0.1	3.21	99	29.7	92.4	30.9	333	60.9	18.1	89	0.1	10.7	16.8	3	2	1	3	22.1453	13.4	1.15	77.1	32.6	7.73	15	1.97	6.8	101.7
82	1	77	5	1	3	1000	200	1	1	2	0	100	4.5	2.5	1.4	0.5	0.2	0	55.7	30.3	10.3	3.2	0.5	4.35	141	42.4	97.6	32.4	332	55.4	15.7	155	0.15	10.3	16.2	1	1	0	3	23.03	10.8	0.94	107	26.5	3.64	16.9	0.24	1.3	80.6
421	1	68	6	0	4	1200	200	1	1	1	0	100	4.7	1.7	0.5	2.4	0.1	0	35.3	10.7	51.4	2.1	0.5	4.31	113	33.9	78.7	26.3	334	48.7	16.6	92	0.11	11.8	16.4	1	1	1	3	20.5151	11.7	1.02	96.9	27.6	3.89	15.2	0.55	3	74.8
317	2	49	2	0	3	400	200	0	1	1	1	100	3	1.4	0.3	1.2	0.1	0	47.3	10.9	39.4	1.8	0.6	3.82	114	34.1	89.2	30	334	50.7	16.3	124	0.11	8.9	16.2	1	1	0	3	21.0772	10.3	0.85	134.1	23.1	2.1	16.4	1.12	5.4	102.4
524	1	70	2	0	3	400	200	0	1	2	0	90	3.7	0.7	0.3	2.5	0.2	0	19.3	9.2	66.7	4	0.8	3.74	119	36.8	98.3	31.8	323	62.2	17.3	112	0.15	13.1	16.2	0	1	0	3	21.3839	10.2	0.85	134.1	23	2.41	16	0.57	2.8	99.8
606	1	62	1	0	4	180	180	0	0	1	0	100	9.3	7.1	1.2	0.9	0.1	0	77.2	12.5	9.2	0.8	0.3	3.24	96	28.3	87.4	29.8	341	52.2	16.2	349	0.33	9.4	15.6	1	1	1	2	17.0433	13.2	1.15	77.9	32.2	3.42	17.2	6.06	18.1	79.4
711	1	79	2	1	4	240	120	0	0	2	1	100	2	1	0.5	0.4	0.1	0	50.1	22.7	19.8	5.9	1.5	4.04	117	35.6	88.1	28.9	329	52.7	16.4	130	0.12	9	15.9	1	1	0	3	21.048	11.2	0.94	111	27.1	2.68	18.2	0.49	2.8	90.8
330	1	56	3	1	4	720	240	0	1	1	1	95	8.6	1.7	1.2	5.7	0.1	0	19.7	13.5	65.9	0.7	0.2	3.52	106	31.9	90.7	30	332	59.2	17.9	115	0.13	11.5	16.9	3	2	1	3	21.7993	10.866	0.9137	139.348	26.786	3.8569	16.023	0.72335	3.176	88.2751
668	1	36	5	0	3	800	160	0	0	1	0	100	6.2	1.9	0.4	3.8	0.1	0	30.3	6.8	61.8	0.9	0.2	4.68	139	41	87.6	29.7	339	49	15.5	157	0.16	10.7	17	1	2	2	3	28.4005	10.3	0.85	134.1	25.1	2.95	15.4	0.46	2	90.2
429	2	52	5	0	2	750	150	0	1	3	0	100	4	2.3	1.3	0.4	0.1	0	56.9	32.3	8.9	1.6	0.3	3.16	97	30	95	30.8	324	64.4	18.2	195	0.2	9.7	16.2	2	0	0	2	19.91	10.9	0.95	105.9	26.2	3.29	16.6	0.34	3.4	103
538	1	70	6	0	4	960	160	1	1	2	0	100	4.4	1.1	0.6	2.5	0.1	0	26	13.4	57.4	2.2	1	3.31	115	34.9	105.5	34.9	330	58	15	227	0.21	9.4	16	3	3	1	3	22.7732	10.6	0.89	124.1	25.1	3.72	15.8	0.6954	3.196	88.003
691	2	56	1	0	3	200	200	0	0	1	0	100	6.3	1.8	0.8	3.5	0.2	0	29.1	12.6	54.8	3	0.5	4.02	130	38.8	96.4	32.3	335	63.6	18.3	119	0.15	12.5	16.8	1	2	0	2	26.0375	11.2	0.94	111	23.6	2.9	16.9	0.66	3.3	89.6
530	1	53	4	0	2	800	200	0	1	1	1	100	3.7	1.4	0.4	1.8	0.1	0	38.1	11.6	47.1	2.6	0.6	4.53	141	41.5	91.6	31	340	59.9	18.2	92	0.12	13.2	16.2	1	0	0	2	22.3094	10.2	0.85	130.8	23.1	1.95	16.9	0.5	2.8	94.4
678	1	58	1	1	3	200	200	0	0	1	1	100	3.6	1.1	0.6	1.7	0.1	0	31.6	17.3	47.1	3.6	0.4	4.58	133	40.1	87.6	29	332	59.3	18.9	133	0.13	10.7	15.9	1	1	0	3	21.7994	10.6	0.89	124.1	25.6	2.61	15	0.38	2.6	82.8
8	1	55	3	0	3	495	165	0	1	1	1	100	3.1	1.4	1.4	0.2	0.1	0	46.5	44.5	6.5	1.9	0.6	4.6	133	40.3	87.8	28.9	329	72.1	22.6	113	0.11	9.4	15.9	2	1	0	3	21.7079	10.6	0.92	109.1	26.5	2.91	17.2	0.43	2	94.4
749	1	78	1	1	4	120	120	0	0	2	0	95	3.3	1.2	0.4	1.6	0.1	0	36.7	11.3	49	2.5	0.5	4.28	125	37.2	86.8	29.1	336	41.6	13.2	95	0.07	7.7	15.7	3	3	1	3	22.4996	14.1	1.21	70.7	30	2.89	15.9	1.74	5.8	70.3
740	1	60	2	0	4	240	120	0	0	1	1	100	5.7	1.2	0.6	3.9	0.1	0	20.2	10.5	67.7	1.3	0.3	4.03	127	38.8	96.3	31.5	328	50.9	14.5	140	0.17	11.3	16.5	2	2	1	4	20.7031	12.7	1	100	37.8	2.5	17.2	0.26	4	99
102	1	66	5	0	2	600	120	1	1	1	0	90	2.8	0.4	2	0.4	0.1	0	13.4	69.7	12.6	3.7	0.6	3.31	109	33.3	100.6	32.8	327	52.8	14.4	139	0.14	9.9	16.4	2	0	0	3	16.7062	12.2	1.07	89.8	27.3	1.47	15.8	1.58	6.9	79.36
362	1	49	2	0	3	460	230	0	1	1	1	100	3.5	0.6	0.2	2.7	0	0	18	5.3	76	0.3	0.4	3.88	126	38.3	98.7	32.4	329	55.8	15.5	214	0.19	8.8	16	2	1	0	2	25.9516	10.874	0.9129	117.451	25.1448	2.7357	16.2	0.6982	3.241	91.835
353	1	60	1	0	3	200	200	0	1	1	0	100	4.2	1	0.4	2.7	0.2	0	23.4	8.8	63.1	3.8	0.9	3.82	119	36	94.3	31.1	331	55.5	16.1	175	0.15	8.8	15.7	2	1	0	3	21.6049	10.8	0.9	119.2	28.7	2.85	16.3	0.36	1.8	73.4
534	2	57	2	0	2	400	200	0	1	1	1	100	4	0.9	0.2	2.8	0.1	0	22.6	5.5	69.7	1.8	0.4	4.03	118	36.3	90.1	29.2	325	47.2	14.9	212	0.24	11.4	16.6	1	0	0	4	18.6851	10.2	0.85	134.1	22.1	2.26	16.6	0.91	3.9	113.5
406	1	48	11	1	3	1870	170	0	1	1	0	100	4.9	1.7	0.5	2.5	0.1	0	35.1	11.1	52.1	1.2	0.5	4.69	141	42.2	89.9	30	334	48.7	14.9	120	0.11	9.4	16.3	2	2	2	1	27.4587	10.2	0.85	130.8	25.3	3.77	17.1	0.61	3	114.3
3	2	62	1	0	3	120	120	1	1	1	0	90	7.8	5.7	1.6	0.4	0.1	0	73.6	19.9	5.1	0.9	0.5	4.23	115	34.2	80.7	27.1	336	43.3	14.5	336	0.3	8.8	15.9	1	1	0	2	21.7784	10.8	0.94	107	23.1	4.86	16.6	0.48	1.7	93.3
742	1	48	3	0	4	420	140	0	0	1	0	100	4.2	1.1	0.4	2.7	0.1	0	25.5	9	62.7	2.5	0.3	4.54	141	41.6	91.7	31.1	339	40.8	12.3	197	0.19	9.5	16.2	1	1	0	2	22.4913	10.2	0.85	130.8	23.9	4.43	16.6	0.44	2	101
433	1	58	6	1	3	1200	200	1	1	1	1	100	6.1	2.9	1	2.2	0.1	0	47.7	15.6	35.5	0.9	0.3	3.96	130	39.8	100.4	32.7	327	61.6	16.9	238	0.22	9.3	16.3	1	1	0	3	21.4692	10.8	0.9	119.5	25.2	4.71	15.7	0.56	2.7	111
822	2	40	3	0	2	600	200	0	0	1	0	100	3.8	1	0.3	2.4	0.1	0	27	7.5	63.6	1.4	0.5	3.92	111	34	86.7	28.2	326	64.4	20.6	186	0.2	10.9	16.1	2	0	0	2	31.051	10.3	0.89	112.5	22.8	2.91	17.2	0.42	1.9	117.9
193	2	67	1	0	4	180	180	0	1	1	0	100	3.2	1.1	0.5	1.2	0.4	0	33.1	14.3	38.4	14	0.2	3.55	95	30.7	86.6	26.8	309	75	25.5	109	0.11	10.2	16.5	1	1	0	3	24.0346	11.4	0.96	107.1	23.8	1.95	17.4	0.95	4.3	84.9
358	2	60	3	0	3	600	200	1	1	1	0	100	2.6	0.9	0.2	1.4	0.1	0	34.5	8.3	53.5	2.7	1	3.8	112	35	92.1	29.6	320	97	29.2	161	0.14	8.6	15.7	2	2	0	2	26.0262	10.88	0.9129	117.404	24.176	2.49949	16.265	0.7011	3.076	97.639
649	1	63	1	0	4	200	200	0	0	1	0	100	5	0.7	2.9	0.8	0.5	0.1	13.9	58.6	16.1	10.5	0.9	4.09	117	36.4	88.9	28.6	321	43.6	13.4	259	0.24	9.1	16	1	2	1	1	21.2585	10.862	0.9126	117.913	26.38	2.86619	16.093	0.7114	3.179	84.5918
773	1	60	1	0	3	200	200	0	0	1	1	100	6.7	1.9	0.5	4.2	0.2	0	27.9	7.1	62.4	2.5	0.1	4.84	147	42.9	88.6	30.4	343	39.8	12.6	181	0.19	10.5	16.1	1	2	0	2	27.9155	10.5	0.88	126.5	23.4	2.46	15.8	0.26	1.9	102.8
531	1	53	5	0	2	1000	200	0	1	1	1	100	4	1.4	0.4	2.1	0.1	0	34.1	10.4	51.8	3.3	0.4	4.72	14	44.7	94.6	31.2	329	59.4	17.3	97	0.13	13.4	16.8	1	0	0	2	23.6652	10.1	0.84	133.3	23.2	1.93	16.6	0.48	2.6	96.8
676	1	58	3	1	3	600	200	0	0	1	1	100	8.6	1.7	0.7	6	0.2	0	19.6	8	69.7	2.5	0.2	4.37	137	41.1	94.1	31.4	333	65.7	19.4	117	0.12	10.5	16.2	1	1	0	3	21.4692	10.5	0.88	126.5	24.3	2.2	17.5	0.3	2.6	81.4
347	1	68	4	0	3	800	200	0	1	1	1	100	2.3	0.5	0.3	1.3	0.2	0	21.7	11.6	59.1	6.7	0.9	3.43	103	32.1	93.7	30	321	59	17.3	120	0.11	9.3	16.3	0	1	0	4	20.2449	11.1	0.93	113	25	16.6	1.81	2.92	10	90.6
698	1	66	5	0	2	1000	200	0	0	1	0	100	3.2	1	0.4	1.6	0.1	0	32.6	12.7	48.8	4.5	1.4	4.36	132	39.5	90.6	30.3	334	37.6	11.4	319	0.27	8.3	15.7	1	0	0	3	25.2595	10.9	0.91	117.2	24.3	4.57	15.2	1.01	2.8	102.5
600	1	69	3	1	4	600	200	1	0	1	0	100	7.1	4.9	1.7	0.5	0.1	0	68.1	23.4	6.3	1.7	0.5	4.55	143	42.9	94.1	31.3	333	48	14	198	0.2	10.9	16.4	1	1	1	3	22.3081	10.2	0.88	113.7	26.5	3.36	16.4	0.19	0.6	99.2
303	2	64	6	1	3	1200	200	0	1	1	0	100	5.6	1.4	0.5	3.5	0.2	0.1	25.3	8.9	61.7	3.3	0.8	4.02	127	27.9	94.2	31.5	335	43.7	12.7	161	0.16	9.6	16.1	0	1	0	3	27.6398	11.1	0.93	113	25.1	3.22	15.9	0.52	2.2	73.5
653	1	66	1	0	2	130	130	0	0	1	1	100	5.4	1	0.6	3.6	0.1	0	18.9	11.1	67.1	2.5	0.4	4.73	146	45.1	95.4	30.9	324	44.6	12.9	167	0.14	8.6	16.3	2	2	0	2	24.4141	10.869	0.914	117.417	25.063	3.07179	16.338	0.6933	3.232	91.318
80	1	65	1	0	3	200	200	0	1	1	0	100	3	1.5	1.1	0.3	0.1	0	49.4	38	9	3.2	0.4	3.73	122	35	93.7	32.7	349	45.7	13	98	0.1	9.9	16.4	0	1	0	3	22.8164	11.4	0.99	100.9	25.3	2.21	15.5	4.65	13.4	68.7
149	1	79	5	1	3	750	150	0	1	2	0	100	9.7	2	0.8	6.8	0.1	0	20.2	8.5	70.2	0.8	0.3	3.74	127	37.7	100.9	34	337	85.2	23.2	218	0.19	10.3	16.5	2	2	0	2	24.9135	10.7	0.99	101.6	24.1	2.79	15.5	0.72	3.7	87.7
767	2	81	1	1	4	100	100	0	0	2	0	100	2.9	1.7	0.6	0.5	0.2	0.1	57.7	19.4	15.9	5.2	1.8	3.88	86	28.2	72.7	22.1	305	51.5	19.7	303	0.29	9.7	15.5	2	0	1	4	21.7778	11.7	0.98	102	21.2	3.22	14.4	4.02	11.4	87.7
197	1	67	1	0	4	200	200	1	1	1	0	100	5.7	2.2	0.6	2.7	0.2	0	38.6	10.5	47.1	3.5	0.3	4.69	163	48.7	103.9	34.8	335	51.6	13.7	128	0.12	9.7	16.3	3	3	1	2	26.3656	10.5	0.88	126.5	26.5	3.32	16	1.4	5.8	88.2
680	1	57	4	1	3	720	180	0	0	1	0	100	0.9	0.6	0.4	1.8	0.1	0	19.6	12.7	64.1	2.8	0.8	3.71	117	35.7	96.1	31.6	328	61.4	17.7	139	0.13	9.2	15.9	2	0	0	2	28.075	10.867	0.9142	117.531	24.7672	2.496	16.395	0.7394	3.318	90.076
339	1	61	4	1	4	520	130	0	1	1	0	100	7.2	1.3	0.9	4.7	0.2	0	18.2	12	66.1	3.3	0.4	3.73	121	36	96.5	32.5	336	45.9	13.4	209	0.19	9.3	16.1	0	3	1	3	19.052	10.7	0.89	124.1	26.6	2.55	17	0.56	2.7	98.9
787	1	64	3	0	3	450	150	0	0	1	0	100	6	2.1	0.6	3.1	0.2	0	34.2	9.4	52.5	3.6	0.3	4.03	134	39	96.7	33.1	344	64	18.2	183	0.18	9.6	15.9	2	1	0	4	20.0288	10.4	0.86	128.3	21.4	2.1	16	0.78	3.3	88.4
324	1	56	9	1	4	2160	240	0	1	1	1	95	4.9	1.3	0.6	2.9	0.1	0	26.4	12.5	59.5	1.4	0.2	3.31	105	31.6	95.5	31.6	332	61.3	17.7	56	0.07	11.9	17.3	3	2	1	3	21.7993	10.988	0.9156	115.164	26.123	3.8661	16.353	0.70915	3.323	91.404
199	2	49	1	0	3	200	200	0	1	1	1	100	3.8	1.5	0.5	1.7	0.1	0	38.9	13.4	44.1	3.1	0.5	4.22	120	36.7	86.9	28.5	327	40.6	13.1	135	0.12	9.1	16.1	1	1	0	3	21.2654	10.7	0.89	124.1	24	2.4	15.9	0.7	4	87.9
134	1	52	2	1	2	400	200	1	1	1	1	100	6.7	0.8	4.4	1.5	0.1	0	12	64.8	21.6	1.2	0.4	4.12	133	40.3	97.8	32.2	330	66.7	18.5	191	0.21	11.6	16.6	2	0	0	1	24.6094	9.8	0.81	145.4	25.1	2.19	15.5	0.55	3.1	93.9
550	2	72	7	1	4	1365	195	0	1	2	1	90	4.4	1.5	0.3	2.5	0.2	0	33.3	7.4	55.6	3.4	0.3	3.14	109	33	105.2	34.6	330	73.5	19.2	1122	0.11	9.3	16.5	3	3	1	2	25.1096	10.2	0.85	134.1	25.2	2.73	16.5	0.7191	3.247	90.1207
228	1	37	1	0	2	200	200	0	1	1	1	100	5.8	2.1	0.5	3.1	0.1	0	35.8	8.2	8.2	1.8	0.4	4.38	130	39.6	90.4	29.8	328	51.5	15.8	259	0.22	8.6	15.5	1	0	0	2	22.7244	10.3	0.86	131.5	23.4	1.9	17.2	1.22	5.3	86.7
507	1	57	1	1	4	130	130	1	1	1	0	100	5	1.2	0.6	3	0.1	0	24.7	12.3	59.7	2.9	0.4	3.79	114	34.1	90.1	30.1	334	42.3	12.8	314	0.26	8.3	15.5	3	3	1	2	22.6562	10.2	0.85	130.8	26.2	6.63	14.3	0.49	3	101.4
56	1	70	6	1	4	1080	180	0	1	2	0	100	5.4	3.2	1.7	0.5	0.2	0	57.9	30.8	8.4	2.8	0.1	4.44	151	44.8	100.8	33.9	336	50.2	13.5	109	0.14	13.1	16.7	1	1	0	3	22.3081	9.9	0.86	117.4	27.3	3.17	17.5	0.5	1.7	90.6
488	2	72	6	1	4	1170	195	0	1	2	1	90	4.9	1.7	0.3	2.8	0.1	0	34	6.5	577.3	1.8	0.4	3.12	109	31.7	101.5	34.9	344	63.2	17.3	143	0.13	9.4	16.6	3	3	1	2	24.8403	10.1	0.84	135.9	25.5	3.7	16.2	0.6829	3.004	92.374
652	1	66	2	0	2	260	130	0	0	1	1	100	4.6	0.8	0.7	3	0.1	0	18	14	65	2.7	0.3	4.62	146	44.1	95.4	31.5	331	46.1	13.2	141	0.13	9.2	16.1	2	2	0	2	25.3906	10.867	0.9143	117.436	25.254	3.2452	16.295	0.7001	3.209	95.389
612	2	70	4	1	4	720	180	0	0	2	0	100	8.4	5.2	2.5	0.5	0.2	0	61.9	30.1	5.7	2.1	0.2	4.08	130	39.4	96.6	31.8	330	58	16.5	322	0.26	8.7	15.7	1	1	1	3	30.5438	10.4	0.9	111.4	27.6	6.91	16.4	1.75	5.3	87.8
405	1	62	4	1	4	800	200	0	1	1	1	100	4.6	1.7	0.3	2.5	0.1	0	37.7	6.3	53	2.2	0.8	2.94	99	30.4	103.3	33.8	326	63.9	17.1	210	0.17	8.1	15.7	3	3	1	3	20.0692	10.5	0.88	126.5	26.1	2.89	16.1	4.64	13	101.2
670	1	36	3	0	3	480	160	0	0	1	0	100	5.5	1.9	0.4	3.1	0.1	0	34.2	7.5	57.1	0.9	0.3	4.83	142	41.5	86	29.4	342	48	15.3	156	0.18	10.7	16.6	1	2	2	3	28.4005	10.4	0.87	128.9	25.6	3.01	15	0.42	2.6	88.4
553	2	38	1	0	2	180	180	1	1	1	0	100	2.9	2.1	0.6	0.2	0.1	0	70.6	18.8	7.4	22.8	0.4	3.78	88	29.4	77.9	23.2	299	71.9	23.3	150	0.18	12.2	16.2	1	0	0	3	19.9481	11.6	0.97	103.7	27.8	1.67	16.6	0.13	1.77	87.4
210	1	72	1	0	4	150	150	1	1	2	0	90	3.7	0.8	0.4	2.3	0.3	0	20.9	9.4	61.4	7.2	1.1	3.95	108	33.2	84.1	27.3	325	41.5	14	166	0.15	9.3	15.9	3	3	1	3	23.0518	11.5	0.97	105.2	24.6	2.52	15.9	3.58	11.9	82.4
310	1	54	3	0	3	420	140	0	1	1	0	100	7.5	2.3	0.6	4.5	0.1	0	31.1	8.4	59.2	1.3	0	5.01	158	48	95.8	31.6	329	53.4	15.2	227	0.27	11.8	16.7	1	2	0	1	22.7732	10.1	0.83	139.6	31.3	3.7	14.7	1.1	2	103.1
666	1	36	7	0	3	1120	160	0	0	1	0	100	9.3	2.6	0.6	5.7	0.3	0	28.1	6.9	61.3	3.5	0.2	4.57	131	41.1	90	28.8	319	39.6	12.1	235	0.2	8.5	15.9	1	2	2	3	29.0688	10.4	0.87	128.9	25.9	3.01	14.3	0.44	2.8	87.1
61	1	54	8	0	4	1040	130	1	1	1	0	100	7.7	4.9	1.9	0.7	0.2	0.1	63.5	25	8.4	2.4	0.7	4.07	135	40.3	99	33	334	47.9	13.2	200	0.21	11	16.2	2	1	1	2	23.03	10.5	0.91	110.2	25.6	3.62	14.3	1.09	3.7	88.3
596	1	66	2	1	4	360	180	0	0	1	0	100	7.3	3.9	2.5	0.5	0.3	0.1	53.9	34.2	7.2	3.8	0.9	3.55	102	31.9	89.8	28.7	320	64.7	19.5	309	0.33	9.7	15.9	1	1	1	3	18.7328	12.2	1.06	89.8	25.9	4.52	14.9	1	3.9	96.2
394	2	62	5	0	3	900	180	0	1	1	0	100	4.4	1.7	0.5	2.1	0.1	0	38.8	10.6	48.2	1.5	0.9	4.05	119	37.3	92.2	29.5	319	64.2	19.2	156	0.16	10	15.5	1	1	0	2	25.2595	11.6	0.98	103.3	27	2.73	17.1	0.15	1.6	96.7
364	1	70	7	1	4	840	120	0	1	2	0	100	4.5	1.4	0.4	2.5	0.2	0	30.8	9.5	55	4.2	0.5	3.66	99	31.1	84.9	27.1	318	52.2	16.6	184	0.18	9.9	15.9	1	2	1	3	22.7732	12.9	1.1	83.3	28.5	2.5	16.3	0.75	2.8	67.2
583	1	58	4	0	3	760	190	1	1	1	0	100	2.6	1.1	0.4	1	0.1	0	44.6	15.1	37.4	2.5	0.4	3.38	112	33.7	99.6	33.1	332	85.6	23.7	85	0.09	10.3	16.2	1	1	0	3	19.3772	11.5	0.97	103.7	23.8	1.9	15.5	2.05	6.8	86.3
463	1	67	6	1	3	720	120	0	1	1	1	100	5.7	0.4	4	4.7	0.1	0	7.8	6.4	83.2	2.2	0.4	3.49	98	29.6	84.9	27.9	331	46.1	14.9	116	0.11	9.2	16.4	2	0	0	3	19.3792	10.8	0.9	119.2	23.7	3.53	15.4	116	3.3	95
594	1	64	1	0	4	180	180	0	0	1	0	50	5.8	2.8	1.9	0.7	0.3	0	48.9	33.4	11.7	5.7	0.3	4.52	142	41	90.7	31.3	346	48.9	14.6	183	0.19	10.5	16.5	1	1	1	1	19.2672	11.9	1.04	94	27.4	3.06	16.4	17.95	43.7	116.6
759	1	69	1	0	4	180	180	0	0	1	0	100	6.8	1.3	0.4	4.9	0.2	0	18.9	6.5	71.6	2.6	0.4	3.89	117	34.4	88.4	30.1	340	42.5	13.4	124	0.13	10.2	16.3	1	1	0	3	22.0386	11.7	0.98	102	26.2	5.4	14.3	1.32	4.6	75.3
588	1	65	6	1	4	840	140	1	1	1	0	100	4.3	1.1	0.5	2.8	0	0	25.2	10.3	63.3	1	0.2	3.9	115	35.8	91.7	29.5	321	46.3	13.7	169	0.16	9.2	15.7	2	1	1	3	17.3745	10.8	0.91	117.1	28.4	4.31	15.8	1.18	5.1	76.3
214	2	56	1	1	4	130	130	0	1	2	1	100	2.4	0.9	0.3	1.1	0.1	0	38.4	12.9	46.3	1.9	0.5	4.16	127	38.4	92.2	30.6	331	42.2	12.6	193	0.21	10.7	16.4	2	2	0	2	27.0552	10.4	0.87	128.9	22	3.7	15.9	0.65	3.1	102.1
312	1	63	3	1	3	660	220	0	1	1	0	100	4.7	1.3	0.5	2.7	0.1	0	28.2	10.8	58.7	1.6	0.7	4.19	136	41	97.8	32.6	332	68.6	19.4	168	0.2	11.7	17.2	1	1	0	2	23.9869	11.2	0.94	111	24.6	4.09	18.6	2.44	9.3	90.7
797	1	42	2	0	4	440	220	0	0	1	1	100	9	0.4	0.3	8.2	0.1	0	4.3	3.7	91.3	0.7	0	4.64	146	43.8	94.3	31.5	333	54.6	15.8	139	0.17	12	16.7	1	1	1	1	17.9592	11.22	0.94	111	25.4	3.7	18.7	1.14	4.6	97.1
91	2	52	3	0	2	540	180	1	1	1	0	100	2.9	1.2	1.4	0.3	0	0	40	48.2	9.6	1.5	0.7	4.51	131	38.2	84.8	84.8	29	343	12.9	188	0.16	8.9	15.7	2	0	0	3	25.4581	10.5	0.91	110.2	23.9	2.06	18.3	0.22	2.2	84.5
778	1	65	1	1	4	120	120	0	0	1	0	100	4.1	1.1	0.7	22	0.1	0	26.2	16.6	54	2.5	0.7	4.24	116	34.5	81.4	27.3	336	43.5	14.8	256	0.22	8.6	15.6	1	1	1	2	18.4672	10.7	0.89	121.7	25.1	4.45	15.6	5.51	13.8	88.5
182	1	60	6	1	2	1200	200	0	1	1	0	100	7	1.1	0.6	5.3	0.1	0	15	8.2	75.7	1	0.1	4.5	108	35.6	79	23.9	303	67.7	24	191	0.18	9.3	15.9	1	0	0	3	22.7204	10.8	0.91	119.5	24.8	3.01	14.5	13.28	36.4	99.6
765	2	68	1	1	2	140	140	0	0	1	0	100	2.7	1.3	0.4	0.9	0.1	0	496	14.3	33.2	1.7	1.2	4.42	107	33.9	76.8	24.2	316	72.7	26.4	171	0.16	9.1	15.3	1	0	0	3	20.0777	10.6	0.89	124.1	23.8	3.19	15.4	7.95	22.7	95.2
381	2	70	3	0	2	450	150	1	1	2	0	100	3.5	1.3	0.2	1.9	0	0	37.2	6.3	54.6	1.2	0.7	4.18	135	40.7	97.4	32.3	332	57.8	16.4	133	0.15	11	16.9	1	0	0	3	22.719	10.4	0.87	126	27.2	2.86	16.9	0.39	2.3	93.4
665	1	36	8	0	3	1280	160	0	0	1	0	100	4.3	1.7	0.4	2.1	0.1	0	40	8.9	49	1.4	0.7	4.52	140	41.6	92	30.9	337	44.2	13.2	173	0.18	10.1	16.6	1	2	2	3	29.0688	10	0.83	139.6	25.1	2.25	17.2	0.42	3	88.1
159	2	42	5	0	3	950	190	0	1	1	0	100	4.9	0.4	3.4	1	0.1	0	8.1	69.7	20.4	1.4	0.4	3.03	96	30	98.9	31.7	320	101.9	28.2	151	0.13	8.4	15.6	1	1	0	2	18.4425	12.7	1	100	31.2	3.05	16.7	0.45	4	97
70	1	56	4	0	3	600	150	0	1	1	1	100	4.6	2.3	1.3	0.7	0.2	0	50.2	29.5	14.9	4.9	0.5	3.25	95	29.2	89.8	29.1	325	57.6	17.6	274	0.23	8.4	15.9	1	1	0	3	22.5981	11.9	1.04	94	28.3	3.17	15.5	1.09	2.6	69.9
589	1	65	5	1	4	700	140	1	1	1	0	100	6.4	1.4	0.6	4.3	0.2	0.1	21.2	9.5	66.1	2.5	0.7	4	123	37.6	94	30.8	327	55.1	16.1	155	0.16	10	16.2	2	1	1	3	17.3745	11	0.92	115.1	25.5	2.84	13.9	2.03	7.7	89.4
132	1	72	1	1	4	200	200	0	1	2	1	100	8	1.1	1.1	5.5	0.3	0	14	14.1	68.7	3.1	0.1	4.24	119	36.5	86.2	28.1	326	42.4	13.6	229	0.19	8.1	15.6	3	3	1	1	21.7738	11.8	0.99	101.6	27.1	4.63	13	1.6	5.8	97.5
45	2	49	7	0	4	1400	200	1	1	1	0	100	4.2	2.1	1.5	0.5	0	0	50.7	36.2	12.6	0.3	0.2	3.71	86	27.3	73.4	23.1	314	52.8	19.4	278	0.26	9.3	15.9	1	1	0	3	22.4813	10.9	0.95	105.9	21.7	2.39	17.4	1.41	5.4	89.4
282	1	60	1	0	4	200	200	0	1	1	1	100	7.2	2.2	0.5	4.1	0.3	0	30.6	7.1	57.4	4.5	0.4	4.93	141	43.8	88.8	28.5	322	46.6	14.5	225	0.26	11.7	16.8	2	1	0	3	24.9135	11.5	0.97	105.2	27.9	4.58	17.3	0.63	3.7	85.6
71	1	65	2	1	3	300	150	0	1	1	0	100	4.4	2.7	1.3	0.4	0.1	0	60.9	28.8	8.3	1.3	0.7	4.33	115	34.2	78.9	26.5	336	50.4	17.8	205	0.23	10.8	16.3	1	2	0	3	23.8087	10.7	0.93	108	25.1	2.99	16.4	0.49	2.1	84.9
674	1	58	5	1	3	1000	200	0	0	1	1	100	3.5	1.1	0.6	1.7	0.2	0	31.7	15.9	47.6	4.3	0.5	4.45	130	38.8	87.3	29.1	335	38.8	12.3	181	0.17	9.3	16.1	1	1	0	3	23.1206	11.4	0.95	109	29.5	2.95	16.5	0.73	2.9	98.5
568	2	77	2	1	3	360	180	1	1	2	0	100	3.9	1.6	0.7	1.5	0.1	0	41.2	17.3	38.6	2.5	0.4	2.75	88	27.6	100.5	32.2	319	66.5	18.2	137	0.12	8.4	15.9	1	1	0	3	20.2848	16.1	1.4	56.8	28.1	2.46	17.2	1.92	6.3	83.9
327	1	56	6	1	4	1440	240	0	1	1	1	95	7.2	1.5	0.7	4.9	0.1	0	20.6	9.2	68.9	0.9	0.4	3.67	116	34.5	93.9	31.7	336	65.9	19	105	0.11	10.3	16.8	3	2	1	3	21.7993	10.876	0.9138	139.454	25.8	3.6926	16.51	0.72825	3.268	93.0487
424	1	71	3	0	3	600	200	0	1	2	0	100	3	1.1	0.3	1.5	0.1	0	35.9	10.3	49.6	3.4	0.8	3.57	112	33.2	93	31.5	337	57.1	17.2	149	0.14	9.3	16.1	2	1	0	3	20.9573	10.9	0.94	105.9	26.1	2.53	17.1	1.14	4.1	80
136	1	51	3	0	4	600	200	0	1	1	1	100	4.2	0.5	2.8	0.9	0	0	12	65.3	21.7	0.9	0.1	5.09	142	42.9	84.2	28	331	42.8	14.1	195	0.18	9.1	15.8	1	1	1	3	22.8374	11.6	0.98	103.3	27.4	4.39	13.7	0.38	2.4	101.2
83	1	54	3	0	4	390	130	1	1	1	0	100	8	4.9	2.2	0.6	0.2	0.1	61.6	27.8	6.9	2.8	0.9	3.5	115	33.7	96.3	32.9	342	56.8	15.9	155	0.19	12.1	16.3	1	1	1	2	23.03	10.3	0.89	112.5	23.2	3.62	16.6	1.39	4.9	99.5
166	2	73	3	1	3	450	150	0	1	2	0	100	4.7	1.2	0.4	3.1	0.1	0	24.7	8.6	65.4	1.2	0.1	3.36	121	36.2	107.8	35.9	334	57.1	14.6	98	0.1	10.7	16.5	1	2	0	2	23.4952	10.9	0.91	117.2	26.8	2.29	15.8	0.42	1.4	100.2
165	2	74	4	1	3	600	150	0	1	2	0	100	3.3	0.9	0.4	2	0.1	0	25.7	13	59.1	2.1	0.1	3.06	111	33.8	110.6	36.3	328	60.6	15	65	0.08	11.9	16.6	1	2	0	2	23.4952	11.3	0.95	109	27.3	2.08	15.5	0.31	1.4	78.6
29	2	67	4	1	3	720	180	0	1	1	0	100	3.9	2.1	1.4	0.4	0.1	0	53.3	34.9	9.9	1.4	0.5	3.42	124	35.2	102.8	36.3	353	74.4	19.4	161	0.13	8.3	15.9	1	1	0	3	24.6711	11.1	0.96	103.9	22.8	2.12	17.6	8.19	20.9	100.9
427	2	51	3	0	2	450	150	0	1	3	0	100	4.9	2.5	2	0.3	0.1	0	50.5	40.3	7.1	1.6	0.5	3.48	104	31.6	90.9	29.9	329	65	19	278	0.23	8.9	15.8	2	0	0	2	19.6506	11	0.95	104.9	26.4	3.7	16.5	0.38	1.7	107.8
194	1	49	1	0	3	230	230	0	1	1	1	100	4	0.9	0.3	2.7	0	0	23	8.1	68.2	0.4	0.3	3.83	122	37.1	96.8	31.9	329	49.2	14.1	125	0.11	9.1	16.1	2	1	0	2	25.9516	10.855	0.9136	117.431	25.832	2.6405	16.284	0.7148	3.311	90.413
726	1	43	5	1	4	750	150	0	0	1	0	100	5.3	0.6	0.3	4.3	0.1	0	11.3	5.4	80.6	2.5	0.2	3.9	121	37.4	96	31.1	324	56	15.8	295	0.29	9.7	16.2	1	0	1	3	19.5682	12.6	1.07	88.2	27.2	6.17	15.1	0.77	3	86.4
539	1	77	3	0	4	450	150	0	1	2	0	100	3.2	1	0.4	1.6	0.3	0	31.8	11.1	48.8	7.8	0.5	3.33	100	29.4	88.2	30	340	46.1	14.4	134	0.13	10	16.4	2	1	3	3	22.7732	10.6	0.89	124.1	28.2	6.5	14.7	6.94	23.9	85
334	2	71	4	0	3	800	200	0	1	2	0	100	2.9	0.6	0.2	1.9	0.1	0	21.7	6.9	66	4.2	1.2	4.14	132	40.4	97.5	31.9	327	51.5	14.4	130	0.13	10.2	16	2	1	0	3	20.9572	10.2	0.85	134.1	25.2	3.44	15.6	0.26	2.4	91.2
137	1	51	4	0	4	800	200	0	1	1	1	100	4	1	0.5	2.5	0.1	0	24	11.9	62.4	1.4	0.3	5.34	148	45.1	84.4	27.7	328	52	17.1	154	0.15	10	16.4	1	1	1	3	22.4913	11.1	0.93	115.1	28.1	2.9	15.9	0.25	1.9	90.9
828	1	68	1	1	3	150	150	0	0	1	0	100	10.5	1.3	0.6	8.4	0.1	0	12.6	5.9	79.9	1.3	0.3	4.48	116	35	78	25.8	331	76.5	25.8	256	0.22	8.5	15	1	2	0	3	24.3375	10.8	0.94	107	26	4.67	15.9	2	6.9	106.6
435	1	60	6	1	4	1200	200	0	1	1	0	100	5	1.7	0.3	3	0	0	32.7	6.8	59.4	0.8	0.3	3.61	115	35.3	97.7	32	326	75.6	21.5	140	0.11	8.1	15.6	0	2	1	1	21.0772	10.9	0.91	117.2	24.5	3.26	16.1	17.49	40.9	106.2
141	1	65	1	1	4	150	150	1	1	1	0	100	3.1	0.5	0.7	1.6	0.2	0	16.1	23.4	53.3	6.6	0.6	4.29	102	33.2	77.4	23.9	307	63.8	23	210	0.15	7.7	15.1	2	2	3	3	22.5309	11.6	0.97	105.2	25.4	3.01	15.1	0.89	3.6	74.1
495	1	60	3	0	4	420	140	1	1	1	0	100	4	1.4	0.4	2.1	0.1	0	35	9.5	52.1	2.7	0.7	4.46	132	40.2	90.2	29.7	328	46.3	14.1	189	0.23	12	16.5	2	1	2	2	21.4533	10.8	0.91	117.1	25.9	3.41	15.3	0.56	2.8	85.6
7	1	54	5	0	4	650	130	0	1	1	0	100	5.8	3.2	1.9	0.5	0.1	0.1	56.2	32.3	8.2	2.3	1	3.52	116	34.5	98	32.8	335	51.7	14.3	132	0.17	13.4	16.2	1	1	1	2	21.2585	10.3	0.89	112.5	25.1	3.72	16.4	1.57	5.6	102.5
543	2	68	1	1	3	200	200	0	1	3	0	100	3.9	1.9	0.5	1.2	0.2	0	49.8	13.7	31.4	4.2	0.9	3.79	111	34.1	90	29.4	326	58.6	17.9	105	0.11	10.7	16.6	2	2	0	3	20.0777	10.6	0.88	123.6	23.7	2.64	15.7	1.18	4.6	93.4
790	2	59	1	0	2	110	110	0	0	1	1	100	4.7	1.5	0.4	2.7	0.1	0	32.6	7.6	56.6	3	0.2	4.85	137	41.8	86.1	28.2	328	42.1	12.8	143	0.14	9.5	15.1	1	0	0	3	19.9792	10.8	0.91	117.1	27.6	2.81	16.7	0.22	2	96.5
236	1	63	4	0	4	720	180	0	1	1	1	100	5.3	1.1	0.7	3.4	0.1	0	21.3	13.6	63.3	1.4	0.4	4.08	138	40.6	99.6	33.9	340	60.1	16.9	86	0.09	10.3	16	1	2	0	3	17.3061	11.5	0.96	107.1	24.5	2.23	17.4	0.36	2.5	82.3
651	1	66	3	0	2	390	130	0	0	1	1	100	4.9	0.8	0.6	3.4	0.1	0	16.3	12.3	68.9	2.2	0.3	4.46	138	42.7	95.8	31	323	46.3	13.4	135	0.12	8.9	16.2	2	2	0	2	25	10.866	0.9143	117.528	25.198	3.2555	16.623	0.7309	3.234	95.469
74	2	51	2	0	2	300	150	0	1	3	0	100	4.2	2.3	1.5	0.4	0.1	0	54.1	35.7	8.3	1.4	0.5	3.44	102	31.1	90.4	29.6	328	61.8	18.2	222	0.22	9.5	15.9	2	0	0	2	19.6506	10.5	0.91	110.2	24.7	2.99	16	0.46	1.9	106.7
672	1	36	1	0	3	160	160	0	0	1	0	100	5.2	1.9	0.3	2.8	0.1	0	37.6	6.4	54.3	1.5	0.2	4.66	133	40.3	86.4	28.6	330	44.2	14.1	206	0.23	10.4	16.1	1	2	2	3	28.4005	10.5	0.96	107.9	26.4	3.44	15.1	0.41	2.1	86.6
276	1	61	1	0	3	230	230	0	1	1	0	100	4	1.2	0.4	2.3	0.1	0	30.8	9.5	56.2	2.8	0.7	3.95	121	37.5	95	30.7	323	47.6	13.8	153	0.16	10.1	16.3	2	2	0	3	21.0667	10.4	0.86	131.5	25.1	203	16.3	0.58	3.4	77.8
466	1	65	6	1	4	900	150	1	1	1	0	100	6.3	1.8	0.7	3.7	0.2	0	28.8	10.6	58.1	2.3	0.2	4.06	114	35.1	86.5	28.2	325	55.2	17.3	77	0.07	87	15.6	2	2	3	3	23.3556	11.6	0.98	103.3	28.3	3.12	16.2	0.43	2.4	87
[truncated: 46 more columns]
