# Supplementary material for: An explainable predictive machine learning model of oxaliplatin induced peripheral neuropathy based on clinical data: a retrospective single center
Source: Research Square preprint supplement (doi:10.21203/rs.3.rs-7911184/v1), 2025-12-01
Supplement: Supplementary file 2 [file 2756b2e0886ca25e91d6ab84.docx]

**Table S3** Baseline characteristics in training set and test set.

|  | **[ALL] N=829** | **0 N=238** | **1 N=591** | **p.overall** |
| --- | --- | --- | --- | --- |
| Age, Median [Q1-Q3] | 62.000 [56.000;69.000] | 60.000 [51.000;66.000] | 63.000 [56.000;70.000] | <0.001 |
| NOCC, Median [Q1-Q3] | 3.000 [2.000;5.000] | 2.000 [1.000;3.000] | 4.000 [3.000;5.000] | <0.001 |
| Total_OXA, Median [Q1-Q3] | 570.000 [300.000;840.000] | 300.000 [180.000;540.000] | 600.000 [400.000;960.000] | <0.001 |
| OXA, Median [Q1-Q3] | 180.000 [150.000;200.000] | 160.000 [130.000;190.000] | 180.000 [150.000;200.000] | <0.001 |
| NRS2002, N (%): |  |  |  | 0.001 |
| 1 | 612 (73.824%) | 198 (83.193%) | 414 (70.051%) |  |
| 2 | 195 (23.522%) | 37 (15.546%) | 158 (26.734%) |  |
| 3 | 11 (1.327%) | 2 (0.840%) | 9 (1.523%) |  |
| 4 | 11 (1.327%) | 1 (0.420%) | 10 (1.692%) |  |
| ECOG, N (%): |  |  |  | 0.425 |
| 0 | 548 (66.104%) | 157 (65.966%) | 391 (66.159%) |  |
| 1 | 280 (33.776%) | 80 (33.613%) | 200 (33.841%) |  |
| 2 | 1 (0.121%) | 1 (0.420%) | 0 (0.000%) |  |
| BI, Median [Q1-Q3] | 100.000 [100.000;100.000] | 100.000 [100.000;100.000] | 100.000 [100.000;100.000] | 0.453 |
| WBC, Median [Q1-Q3] | 4.500 [3.700;5.800] | 4.600 [3.800;5.900] | 4.500 [3.700;5.700] | 0.472 |
| LYM, Median [Q1-Q3] | 1.300 [1.000;1.800] | 1.300 [1.000;1.800] | 1.300 [1.000;1.850] | 0.500 |
| MON, Median [Q1-Q3] | 0.500 [0.400;0.900] | 0.500 [0.400;0.875] | 0.500 [0.400;0.900] | 0.993 |
| NEU, Median [Q1-Q3] | 2.200 [1.300;3.100] | 2.200 [1.400;3.300] | 2.100 [1.200;3.100] | 0.366 |
| EOS, Median [Q1-Q3] | 0.100 [0.100;0.200] | 0.100 [0.100;0.200] | 0.100 [0.100;0.200] | 0.824 |
| LYM1, Median [Q1-Q3] | 30.800 [21.600;40.700] | 30.400 [20.125;38.875] | 31.100 [22.400;41.150] | 0.381 |
| MON1, Median [Q1-Q3] | 10.500 [8.100;15.300] | 10.150 [7.500;17.100] | 10.500 [8.300;14.650] | 0.437 |
| NEU1, Median [Q1-Q3] | 53.400 [37.600;63.000] | 54.000 [38.200;63.550] | 53.400 [37.500;62.600] | 0.762 |
| EOS1, Median [Q1-Q3] | 2.200 [1.400;3.700] | 2.200 [1.400;3.700] | 2.200 [1.400;3.700] | 0.929 |
| BAS1, Median [Q1-Q3] | 0.400 [0.300;0.600] | 0.400 [0.300;0.600] | 0.400 [0.200;0.600] | 0.687 |
| RBC, Median [Q1-Q3] | 3.950 [3.620;4.320] | 4.135 [3.842;4.460] | 3.850 [3.550;4.230] | <0.001 |
| HGB, Median [Q1-Q3] | 120.000 [108.000;132.000] | 122.500 [108.000;136.000] | 120.000 [108.500;131.000] | 0.144 |
| HCT, Median [Q1-Q3] | 36.400 [33.100;39.900] | 36.800 [33.525;41.000] | 36.200 [33.000;39.450] | 0.087 |
| MCV, Median [Q1-Q3] | 93.300 [87.900;97.700] | 90.050 [85.825;94.400] | 94.600 [89.500;98.900] | <0.001 |
| MCH, Median [Q1-Q3] | 31.000 [28.800;32.300] | 29.700 [27.925;31.400] | 31.200 [29.300;32.800] | <0.001 |
| MCHC, Median [Q1-Q3] | 330.000 [324.000;335.000] | 329.000 [323.000;335.750] | 330.000 [324.000;335.000] | 0.288 |
| RDW_SD, Median [Q1-Q3] | 54.700 [48.600;64.000] | 52.250 [46.300;59.925] | 56.100 [49.750;65.250] | <0.001 |
| RDW_CV, Median [Q1-Q3] | 16.300 [14.300;18.800] | 16.150 [13.800;18.600] | 16.300 [14.400;18.850] | 0.047 |
| PLT, Median [Q1-Q3] | 160.000 [124.000;203.000] | 171.500 [139.250;211.750] | 152.000 [114.500;200.000] | <0.001 |
| PCT, Median [Q1-Q3] | 0.150 [0.120;0.200] | 0.170 [0.140;0.200] | 0.150 [0.120;0.190] | <0.001 |
| MPV, Median [Q1-Q3] | 9.700 [8.900;10.500] | 9.500 [8.825;10.400] | 9.800 [9.000;10.650] | 0.010 |
| PDW, Median [Q1-Q3] | 16.100 [15.800;16.400] | 16.000 [15.800;16.300] | 16.100 [15.900;16.400] | <0.001 |
| TT, Median [Q1-Q3] | 16.300 [15.600;17.100] | 16.200 [15.500;16.900] | 16.300 [15.600;17.100] | 0.072 |
| D_Dimer, Median [Q1-Q3] | 0.701 [0.420;1.180] | 0.730 [0.402;1.237] | 0.694 [0.420;1.140] | 0.951 |
| FDP, Median [Q1-Q3] | 3.167 [2.300;4.500] | 3.188 [2.300;4.675] | 3.155 [2.400;4.500] | 0.931 |
| ATIII, Median [Q1-Q3] | 90.200 [84.400;98.291] | 90.850 [85.890;97.850] | 90.000 [83.800;98.300] | 0.280 |
| AFP, Median [Q1-Q3] | 2.880 [2.080;3.880] | 3.045 [2.282;4.288] | 2.820 [2.040;3.770] | 0.014 |
| CEA, Median [Q1-Q3] | 2.370 [1.350;5.260] | 2.210 [1.212;7.787] | 2.430 [1.450;4.925] | 0.421 |
| CA19_9, Median [Q1-Q3] | 11.000 [6.780;22.450] | 9.793 [6.605;22.800] | 11.440 [6.860;21.850] | 0.630 |
| CA72_4, Median [Q1-Q3] | 3.660 [1.590;9.150] | 4.675 [1.632;10.755] | 3.470 [1.535;8.170] | 0.020 |
| CA_125, Median [Q1-Q3] | 9.562 [6.670;13.200] | 9.600 [6.935;13.580] | 9.500 [6.515;13.101] | 0.366 |
| DBIL, Median [Q1-Q3] | 2.000 [1.600;2.700] | 1.800 [1.400;2.400] | 2.200 [1.700;2.900] | <0.001 |
| IBIL, Median [Q1-Q3] | 8.800 [6.700;11.500] | 8.000 [6.400;9.875] | 9.100 [7.000;12.200] | <0.001 |
| TP, Median [Q1-Q3] | 66.400 [62.900;70.200] | 66.200 [63.400;69.300] | 66.500 [62.750;70.600] | 0.521 |
| ALB, Median [Q1-Q3] | 38.200 [36.000;40.500] | 38.300 [36.125;40.300] | 38.200 [35.900;40.500] | 0.948 |
| GLOB, Median [Q1-Q3] | 28.194 [25.600;30.800] | 28.300 [25.600;30.400] | 28.100 [25.600;30.800] | 0.977 |
| AG, Median [Q1-Q3] | 1.360 [1.230;1.520] | 1.360 [1.220;1.530] | 1.360 [1.230;1.510] | 0.723 |
| TBIL, Median [Q1-Q3] | 10.700 [8.300;14.400] | 9.800 [7.725;12.075] | 11.200 [8.700;14.900] | <0.001 |
| PA, Median [Q1-Q3] | 239.800 [211.100;268.185] | 248.250 [215.550;283.175] | 235.900 [206.100;266.400] | 0.007 |
| ALT, Median [Q1-Q3] | 21.000 [14.000;33.000] | 22.500 [14.000;37.000] | 21.000 [14.000;32.000] | 0.170 |
| AST, Median [Q1-Q3] | 27.000 [21.000;37.000] | 26.000 [21.000;37.750] | 28.000 [21.000;37.000] | 0.440 |
| ASTALT, Median [Q1-Q3] | 1.300 [1.000;1.620] | 1.190 [0.910;1.500] | 1.330 [1.065;1.645] | <0.001 |
| ASTm, Median [Q1-Q3] | 9.000 [6.700;12.100] | 8.850 [6.425;11.850] | 9.000 [6.750;12.200] | 0.830 |
| GLDH, Median [Q1-Q3] | 4.500 [2.500;8.200] | 4.550 [2.300;7.275] | 4.403 [2.500;8.500] | 0.724 |
| GGT, Median [Q1-Q3] | 31.000 [20.000;58.000] | 33.000 [20.000;67.000] | 31.000 [20.000;54.000] | 0.554 |
| ALP, Median [Q1-Q3] | 87.000 [69.000;115.000] | 87.000 [67.000;114.750] | 87.000 [70.000;114.500] | 0.515 |
| LDH, Median [Q1-Q3] | 184.000 [159.000;216.000] | 177.000 [154.000;212.750] | 186.000 [162.500;217.000] | 0.048 |
| CK, Median [Q1-Q3] | 56.000 [40.000;76.000] | 50.500 [37.000;70.000] | 58.000 [43.000;80.000] | <0.001 |
| ADA, Median [Q1-Q3] | 11.000 [8.800;13.600] | 10.800 [8.400;12.950] | 11.100 [9.000;14.215] | 0.023 |
| TBA, Median [Q1-Q3] | 7.400 [5.100;11.400] | 6.950 [4.800;9.400] | 7.700 [5.300;12.500] | 0.001 |
| CG, Median [Q1-Q3] | 1.840 [1.500;2.710] | 1.710 [1.440;2.160] | 1.930 [1.530;3.155] | <0.001 |
| CHE, Median [Q1-Q3] | 6302.000 [5370.000;7369.000] | 6281.500 [5337.000;7264.750] | 6318.000 [5378.500;7455.500] | 0.218 |
| FIB, Median [Q1-Q3] | 2.890 [2.430;3.470] | 2.918 [2.480;3.415] | 2.860 [2.415;3.485] | 0.539 |
| Fe, Median [Q1-Q3] | 12.710 [9.000;16.666] | 11.710 [8.338;16.157] | 12.970 [9.469;16.825] | 0.064 |
| TRF, Median [Q1-Q3] | 2.380 [2.080;2.690] | 2.330 [2.045;2.580] | 2.420 [2.090;2.735] | 0.009 |
| GLU, Median [Q1-Q3] | 4.930 [4.530;5.590] | 4.879 [4.460;5.547] | 4.970 [4.570;5.600] | 0.111 |
| Urea, Median [Q1-Q3] | 5.440 [4.530;6.520] | 5.315 [4.438;6.457] | 5.510 [4.560;6.570] | 0.241 |
| CREA, Median [Q1-Q3] | 63.800 [55.000;72.500] | 67.450 [58.125;74.875] | 62.500 [53.800;71.800] | <0.001 |
| eGFR, Median [Q1-Q3] | 118.440 [103.390;137.250] | 115.515 [101.768;132.842] | 119.450 [104.595;139.890] | 0.038 |
| UA, Median [Q1-Q3] | 305.500 [258.700;369.800] | 335.050 [269.525;390.100] | 297.300 [255.050;355.400] | <0.001 |
| T2_M2, Median [Q1-Q3] | 2.190 [1.870;2.590] | 2.230 [1.860;2.615] | 2.190 [1.880;2.580] | 0.929 |
| RBP, Median [Q1-Q3] | 35.700 [30.500;42.400] | 35.950 [31.525;43.400] | 35.500 [30.200;42.000] | 0.216 |
| CYCS, Median [Q1-Q3] | 0.950 [0.840;1.080] | 0.960 [0.840;1.070] | 0.950 [0.840;1.080] | 0.672 |
| NGAL, Median [Q1-Q3] | 109.093 [71.400;159.000] | 106.474 [69.100;156.200] | 110.300 [72.700;159.900] | 0.210 |
| CHOL, Median [Q1-Q3] | 4.722 [4.210;5.100] | 4.780 [4.203;5.415] | 4.708 [4.230;5.009] | 0.017 |
| TG, Median [Q1-Q3] | 1.570 [1.194;2.040] | 1.510 [1.150;1.995] | 1.600 [1.235;2.043] | 0.248 |
| HDL_C, Median [Q1-Q3] | 1.195 [1.068;1.350] | 1.160 [1.050;1.300] | 1.200 [1.080;1.354] | 0.035 |
| LDL_C, Median [Q1-Q3] | 2.888 [2.540;3.160] | 2.920 [2.600;3.328] | 2.879 [2.520;3.085] | 0.008 |
| sdLDL, Median [Q1-Q3] | 0.873 [0.700;1.070] | 0.850 [0.680;1.062] | 0.880 [0.710;1.070] | 0.316 |
| APOA_1, Median [Q1-Q3] | 1.280 [1.160;1.397] | 1.230 [1.102;1.330] | 1.294 [1.184;1.417] | <0.001 |
| BMI, Median [Q1-Q3] | 22.598 [20.809;24.490] | 23.424 [21.146;25.249] | 22.477 [20.670;23.993] | <0.001 |
| PT, Median [Q1-Q3] | 10.868 [10.500;11.200] | 10.867 [10.500;11.300] | 10.870 [10.400;11.150] | 0.169 |
| INR, Median [Q1-Q3] | 0.914 [0.880;0.950] | 0.914 [0.890;0.960] | 0.913 [0.880;0.950] | 0.281 |
| PT1, Median [Q1-Q3] | 115.100 [107.000;123.600] | 115.100 [107.000;121.400] | 115.100 [107.000;124.100] | 0.151 |
| APTT, Median [Q1-Q3] | 25.300 [24.200;26.500] | 25.183 [24.125;26.360] | 25.329 [24.200;26.600] | 0.316 |
| APOB, Median [Q1-Q3] | 0.940 [0.840;1.060] | 0.970 [0.840;1.110] | 0.937 [0.850;1.033] | 0.149 |
| LAP, Median [Q1-Q3] | 50.200 [42.900;60.000] | 50.750 [43.000;57.990] | 50.200 [42.750;60.658] | 0.862 |
| BAS, N (%): |  |  |  | 0.122 |
| 0 | 767 (92.521%) | 226 (94.958%) | 541 (91.540%) |  |
| 0.1 | 62 (7.479%) | 12 (5.042%) | 50 (8.460%) |  |
| T, N (%): |  |  |  | <0.001 |
| 0 | 72 (8.685%) | 20 (8.403%) | 52 (8.799%) |  |
| 1 | 410 (49.457%) | 133 (55.882%) | 277 (46.870%) |  |
| 2 | 247 (29.795%) | 75 (31.513%) | 172 (29.103%) |  |
| 3 | 100 (12.063%) | 10 (4.202%) | 90 (15.228%) |  |
| N, N (%): |  |  |  | <0.001 |
| 0 | 172 (20.748%) | 58 (24.370%) | 114 (19.289%) |  |
| 1 | 338 (40.772%) | 82 (34.454%) | 256 (43.316%) |  |
| 2 | 231 (27.865%) | 86 (36.134%) | 145 (24.535%) |  |
| 3 | 88 (10.615%) | 12 (5.042%) | 76 (12.860%) |  |
| M, N (%): |  |  |  | <0.001 |
| 0 | 480 (57.901%) | 131 (55.042%) | 349 (59.052%) |  |
| 1 | 274 (33.052%) | 80 (33.613%) | 194 (32.826%) |  |
| 2 | 27 (3.257%) | 18 (7.563%) | 9 (1.523%) |  |
| 3 | 48 (5.790%) | 9 (3.782%) | 39 (6.599%) |  |
| Grade, N (%): |  |  |  | 0.896 |
| 1 | 69 (8.323%) | 22 (9.244%) | 47 (7.953%) |  |
| 2 | 188 (22.678%) | 56 (23.529%) | 132 (22.335%) |  |
| 3 | 526 (63.450%) | 147 (61.765%) | 379 (64.129%) |  |
| 4 | 46 (5.549%) | 13 (5.462%) | 33 (5.584%) |  |
| Sex, N (%): |  |  |  | <0.001 |
| 1 | 574 (69.240%) | 191 (80.252%) | 383 (64.805%) |  |
| 2 | 255 (30.760%) | 47 (19.748%) | 208 (35.195%) |  |
| PMH, N (%): |  |  |  | 0.880 |
| 0 | 451 (54.403%) | 128 (53.782%) | 323 (54.653%) |  |
| 1 | 378 (45.597%) | 110 (46.218%) | 268 (45.347%) |  |
| CCS, N (%): |  |  |  | 0.055 |
| 2 | 138 (16.647%) | 50 (21.008%) | 88 (14.890%) |  |
| 3 | 303 (36.550%) | 89 (37.395%) | 214 (36.210%) |  |
| 4 | 388 (46.803%) | 99 (41.597%) | 289 (48.900%) |  |
| ETCO, N (%): |  |  |  | <0.001 |
| 0 | 614 (74.065%) | 230 (96.639%) | 384 (64.975%) |  |
| 1 | 215 (25.935%) | 8 (3.361%) | 207 (35.025%) |  |
