# Supplementary material for: An explainable predictive machine learning model of oxaliplatin induced peripheral neuropathy based on clinical data: a retrospective single center
Source: Research Square preprint supplement (doi:10.21203/rs.3.rs-7911184/v1), 2025-12-01
Supplement: Supplementary file 3 [file 358a5904307a07c20a33a9b6.docx]

**Table S3** Performance of the GBDT classification model for predicting the risk of depression among individuals with arthritis

|  | AUC(95%CI) | cutoff(95%CI) | Precision  (95%CI) | Sensitivity  (95%CI) | Specificity  (95%CI) | PPV  (95%CI) | NPV  (95%CI) | F1score  (95%CI) |
| --- | --- | --- | --- | --- | --- | --- | --- | --- |
| Training set | 0.993(0.991-0.994) | 0.647(0.628-0.667) | 0.957(0.949-0.965) | 0.952(0.943-0.961) | 0.969(0.962-0.975) | 0.987(0.984-0.990) | 0.890(0.871-0.909) | 0.969(0.964-0.975) |
| Validation set | 0.911(0.887-0.934) | 0.647(0.628-0.667) | 0.831(0.805-0.857) | 0.853(0.824-0.882) | 0.775(0.681-0.869) | 0.907(0.873-0.941) | 0.678(0.642-0.715) | 0.878(0.861-0.896) |
| Test set | 0.892(0.837-0.947) | 0.63 | 0.808 | 0.862 | 0.684 | 0.862 | 0.684 | 0.862 |

AUC: Area Under the Curve; Positive Predictive Value, PPV; Negative Predictive Value, NPV.
