# Supplementary material for: An explainable predictive machine learning model of oxaliplatin induced peripheral neuropathy based on clinical data: a retrospective single center
Source: Research Square preprint supplement (doi:10.21203/rs.3.rs-7911184/v1), 2025-12-01
Supplement: Supplementary file 4 [file d72939da33f9ab37e7dbd578.xlsx]

## Sheet: Sheet1
No.	Sex	Age	T	N	M	Grade	KRAS	NRAS	BRAF	NOCC	PMH	CCS	Total_OXA	OXA	ETCO	group	BMI	NRS2002	ECOG	BI	WBC	LYM	MON	NEU	EOS	BAS	LYM%	MON%	NEU%	EOS%	BAS%	RBC	HGB	HCT	MCV	MCH	MCHC	RDW-SD	RDW-CV	PLT	PCT	MPV	PDW	PT	INR	PT%	APTT	FIB	TT
1	1	64	4	1	0	3	1	0	0	1	0	3	200	200	1	1	24.093	1	0	100	6.5	3.4	2.4	0.4	0.3	0.1	52	37.1	5.4	4.2	1.3	4.85	146	43.9	90.5	30.1	332	48.1	14.7	247	0.24	9.8	15.8	10.3	0.89	112.5	23.2	3.84	16.4
2	2	76	4	0	0	2	0	0	0	4	0	2	720	180	1	1	21.6311	2	0	100	5.4	2.9	1.8	0.6	0.1	0	52.9	33.1	11	2.5	0.5	3.39	114	34.2	100.7	33.7	335	59.2	16.3	145	0.15	10.3	16.2	11	0.96	104.9	25.6	3.24	18.2
3	2	62	3	1	0	2	1	0	0	1	0	3	120	120	1	1	21.7784	1	0	90	7.8	5.7	1.6	0.4	0.1	0	73.6	19.9	5.1	0.9	0.5	4.23	115	34.2	80.7	27.1	336	43.3	14.5	336	0.3	8.8	15.9	10.8	0.94	107	23.1	4.86	16.6
4	1	70				3				4	1	4	800	200	1	1	25.2826	2	0	100	7.4	4.1	2.5	0.5	0.2	0.1	55.36	34.3	7	2.5	0.6	5	159	45.9	92	31.8	346	46.2	13.8	253	0.21	8.9	16	9.4	0.8	124.1	27.3	3.42	15.5
5	1	70				3				1	1	4	200	200	1	1	25.7117	2	0	100	11.4	3.1	7.7	0.4	0.2	0.1	26.8	67.4	3.6	1.7	0.5	4.22	100	31.7	75.1	23.6	314	64	23.9	112	0.1	9.4	15.2	11	0.96	104.9	27.5	2.53	18.4
6	2	61	4	0	0	3				1	0	2	200	200	0	1	22.5827	1	1	100	4.4	2.1	1.6	0.5	0.2	0	47.1	36.7	11.2	4.3	0.7	3.83	120	34.6	90.4	31.2	346	41.1	12.9	180	0.15	8.2	15.4	10	0.87	116.1	25.9	2.65	15.8
7	1	54				2	1	0	0	5	0	4	650	130	0	1	21.2585	1	0	100	5.8	3.2	1.9	0.5	0.1	0.1	56.2	32.3	8.2	2.3	1	3.52	116	34.5	98	32.8	335	51.7	14.3	132	0.17	13.4	16.2	10.3	0.89	112.5	25.1	3.72	16.4
8	1	55	4	1	0	3				3	0	3	495	165	0	1	21.7079	1	1	100	3.1	1.4	1.4	0.2	0.1	0	46.5	44.5	6.5	1.9	0.6	4.6	133	40.3	87.8	28.9	329	72.1	22.6	113	0.11	9.4	15.9	10.6	0.92	109.1	26.5	2.91	17.2
9	2	61	4	0	0	3				3	1	2	600	200	0	1	22.5827	1	0	100	3.7	1.3	1.8	0.5	0.1	0	35.2	48.4	13.5	2.3	0.6	3.25	112	32	98.5	34.5	350	67.1	19.1	125	0.12	9.5	16.3	10.4	0.9	111.4	25.3	2.91	18
10	2	62	3	1	0	2	1	0	0	3	1	3	360	120	0	1	23.0112	1	0	90	3.7	3.1	0.2	0.4	0.1	0	82	5.4	10.2	2	0.4	3.56	104	31.2	87.8	29.2	332	54.2	17.1	167	0.15	8.5	15.5	9.9	0.86	117.4	22.9	3.42	17.8
11	1	65	3	2	0	3	0	0	0	1	1	3	150	150	0	1	23.8087	1	0	100	2.2	0.5	1.2	0.4	0.1	0	21.1	56	18	4.1	0.8	4.47	117	35.1	78.5	26.1	332	47.8	16.8	299	0.29	9.8	15.9	11.3	0.98	101.9	24.5	2.73	17.9
12	1	59	5	5	1	3				2	1	4	400	200	1	1	24.0238	1	0	100	4.3	2.2	1.7	0.3	0.1	0	51.1	39.7	7.3	1.7	0.2	4.14	134	39.8	96	32.4	337	59	16.9	119	0.13	11.4	16.3	10.5	0.91	110.2	28.9	2.11	18
13	2	63	3	1	0	2	1	0	0	5	1	3	600	120	1	1	23.0112	1	0	90	9.1	7.5	0.9	0.7	0	0	82.7	9.5	7.2	0.4	0.2	3.39	100	29.5	86.9	29.5	340	59.7	18.4	162	0.14	8.4	16	10.5	0.91	110.2	21.8	3.55	17.1
14	1	56	5	5	1	2	1	0	0	5	1	4	750	150	1	1	27.0993	1	0	100	9	6.5	1.3	0.8	0.4	0	72.2	13.9	8.9	4.7	0.3	4.53	135	41.3	91.1	29.8	327	47.1	14.2	235	0.24	10.5	16	11	0.95	104.9	30.1	6.55	17.3
15	1	47	5	1	0					2	0	3	240	120	1	1	22.8624	1	0	100	5.1	2.6	1.9	0.5	0.1	0.1	82.7	9.5	7.2	1.6	1	4.3	133	39.1	90.9	30.9	340	45.1	13.7	203	0.21	10	15.9	10	0.86	116.1	25.2	2.89	17.2
16	1	69	4	2	0	3	1	0	0	1	0	3	200	200	1	1	19.3098	1	0	95	4.7	3.1	1.1	0.4	0.1	0	23.1	8.8	65.3	2.3	0.5	3.49	111	33	94.6	31.7	336	55.8	16.4	171	0.15	8.9	15.9	10.6	0.92	109.1	26.5	2.53	17.6
17	1	75	3	1	0	3	1	0	0	1	1	3	150	150	1	1	21.4692	4	0	100	6.3	4.8	0.9	0.4	0.1	0.1	14.1	6.9	76.9	1.1	1	4.09	112	34.9	85.4	27.5	321	44.8	14.4	311	0.27	8.7	15.6	11.1	0.96	103.9	29.3	3.35	13.8
18	1	59	5	5	1	3				3	1	4	600	200	1	1	24.0238	1	0	100	3.7	1.8	1.7	0.2	0.1	0	44.1	6.2	47.7	1.5	0.5	4.08	136	40.4	99.1	33.3	337	60.7	16.8	95	0.1	10.2	16.1	11.3	0.98	101.9	28.8	2.06	16.5
19	1	47	5	1	0					3	0	3	360	120	1	1	22.8624	1	0	100	6.9	4.9	1.3	0.7	0.1	0	70.6	18.2	10.1	0.8	0.3	4.51	139	40.5	89.7	30.9	344	47.3	14.1	222	0.21	9.9	15.8	9.8	0.84	118.7	24.5	3.17	15.5
20	1	70				3				4	1	4	800	200	1	1	25.7117	2	0	100	7.3	3.6	3	0.5	0.2	0	49.2	41.2	6.8	2.2	0.6	4.28	116	35.9	83.9	27.1	323	76.8	24.7	87	0.09	10.1	15.7	10.8	0.94	107	26.8	2.7	16.1
21	1	70				3				5	1	4	1000	200	1	1	25.2826	2	0	100	6.4	4	1.8	0.4	0.1	0.1	28.4	5.9	62.9	2	0.8	4.83	145	43.8	90.6	29.9	330	44.9	13.4	251	0.25	10.1	16.8	10.4	0.9	111.4	28.4	3.48	15.4
22	1	69	4	2	0	3	1	0	0	2	0	3	400	200	1	1	19.3098	1	0	100	4.4	2.6	1.8	0.4	0.2	0	27.1	9.3	58.8	4.3	0.5	3.88	126	38.1	98.3	32.5	331	60.5	16.8	191	0.2	10.1	16.3	10.2	0.88	113.7	25.2	3.11	15.5
23	1	53	4	0	0	3				3	1	2	600	200	0	1	21.7181	1	0	100	5.9	2.7	2.6	0.4	0.2	0.1	43.4	6.6	46	3.2	0.8	3.88	130	38.6	99.7	33.6	337	46.6	12.8	210	0.19	9.5	16.1	10.7	0.93	108	25.4	2.15	17.8
24	1	67				1	1	0	0	3	0	4	600	200	1	1	23.6614	1	0	100	6.4	3.9	1.9	0.4	0.2	0	29.5	6.1	61.5	2.6	0.3	4.32	155	45.4	105.1	35.8	341	52.1	13.5	95	0.12	12.4	16.5	10.7	0.93	108	30.1	3.37	16.7
25	1	53	4	1	0	3	0	0	0	3	0	3	600	200	1	1	22.2753	1	0	100	6.7	4.3	1.6	0.6	0.1	0	24.2	9.3	64.5	1.6	0.4	4.34	98	31.3	72.1	22.5	312	67.7	26.1	222	0.17	8.2	15.1	10.9	0.95	105.9	24.4	1.87	18.3
26	2	53								4	0	4	680	170	0	1	18.7962	1	0	80	3.2	1.9	1	0.2	0.1	0	59.9	29.9	7.3	2.7	0.2	1.62	57	17.4	107.5	35.1	326	59.6	15.2	5	0.01	12.7	16.9	11.8	1.03	95.4	26.7	4.43	14.8
27	2	63	3	0	0	2				4	0	2	720	180	1	1	18.6709	1	0	100	3.6	1.4	1.7	0.3	0.1	0	40.3	48.3	8.1	2.9	0.4	3.56	119	35.7	100.5	33.5	334	59.2	16	113	0.14	11.5	16.7	11.5	1	100	25.5	2.12	18.6
28	1	76	4	0	0	3	0	0	0	4	1	2	640	160	1	1	23.7253	2	0	100	4.7	3	1	0.5	0.2	0	65	10.8	20.7	3.1	0.4	3.8	135	38.9	102.5	35.6	347	49	13	212	0.21	10.1	16.3	10.8	0.94	107	24.5	3	17
29	2	67	3	1	0	3	0	0	0	4	1	3	720	180	0	1	24.6711	1	0	100	3.9	2.1	1.4	0.4	0.1	0	53.3	34.9	9.9	1.4	0.5	3.42	124	35.2	102.8	36.3	353	74.4	19.4	161	0.13	8.3	15.9	11.1	0.96	103.9	22.8	2.12	17.6
30	1	63	5	2	1	3	0	0	0	2	0	4	436.8	218.4	0	1	19.5918	1	0	100	6.1	3.5	1.7	0.7	0.1	0	57.5	27.9	11.7	57.5	2.4	0.5	4.34	148	41.8	96.4	34	353	45	13.1	246	7.7	15.5	11.4	0.99	100.9	30.1	3.67	17
31	2	59	3	1	0	3				4	1	3	800	200	0	1	26.398	1	0	100	3.5	2	1.2	0.3	0	0	55.9	34.9	7.9	1	0.3	3.41	112	32	94	32.8	349	67.8	19.5	63	0.09	14.8	16.5	11.3	0.98	101.9	23.8	3.93	19.6
32	1	58	4	2	0	4	1	0	0	4	1	3	800	200	1	1	22.4001	1	0	100	4	1.8	1.7	0.4	0.1	0	44.1	42.4	10.1	3.1	0.3	3.79	138	40.7	107.3	36.3	338	62.4	16	210	0.17	8.2	15.8	12.1	1.05	91.2	23.6	3	19.2
33	1	69	4	0	0	3				3	0	2	600	200	0	1	24.3911	1	0	100	3.3	1.7	0.9	0.4	0.2	0	28.1	11.4	52.8	7	0.7	3.81	109	32.2	84.7	28.6	337	55.9	17.9	151	0.15	9.9	15.3	11.7	1.02	96.9	26.4	2.32	17.6
34	1	70				2				5	1	4	1000	200	0	1	21.3039	2	0	100	6.4	4.8	1	0.4	0.2	0	74.4	15.8	6.8	2.7	0.3	4.28	130	39.1	91.2	30.4	334	56.7	16.9	186	0.21	11.3	16.2	11.4	0.99	100.9	33.7	4.67	16.1
35	1	64	3	2	1	4	0	0	0	4	1	4	720	180	0	1	21.0938	1	0	100	3.8	2.6	0.9	0.4	0	0	67.1	22.9	9.6	0.2	0.2	2.16	74	22.2	103	34.5	335	61.9	16.1	95	0.13	12.1	16.9	13.1	1.14	79	33.7	4.52	16.3
36	2	53								4	1	4	480	120	1	1	26.6667	1	0	100	5.5	3.4	1.7	0.3	0	0	61.4	31.3	6.1	0.8	0.4	3.68	103	33.5	91	28.1	308	54.1	16.2	265	0.25	10.2	15.7	9.6	0.83	121.3	23	2.22	18.3
37	1	55	4	1	0	3				1	0	3	165	165	0	1	22.4913	1	0	90	5	2.3	2	0.4	0.2	0	46.9	39.2	8.7	4.8	0.4	4.41	123	36.7	83.2	27.8	334	64.9	21.4	129	0.12	9.6	15.8	10.6	0.92	109.1	26.3	3.23	16.2
38	1	67	2	2	0	2				0	0	3	150	150	0	1	19.3772	1	0	100	3.1	2.1	0.5	0.4	0	0	69.6	17.5	11.8	0.9	0.2	3.78	103	31.2	82.7	27.4	331	50.5	16.3	189	0.15	8	15.7	12.3	1.07	88.5	25.5	2.84	16.9
39	2	60	3	0	0	3				3	0	2	450	150	1	1	24.8875	1	0	100	2.8	0.9	1.4	0.4	0.1	0	31.6	51.7	13.9	2.5	0.3	3.42	117	34.9	102	34.3	336	61.9	16.4	68	0.07	10.2	16.6	11.5	1	100	25.1	3.42	19.2
40	1	72	4	0	0	3				1	0	2	180	180	0	1	20.202	2	0	100	3.8	2.2	1	0.3	0.2	0	58.5	25.4	9.1	6.4	0.6	3.76	118	35.2	93.6	31.5	336	53.9	15.9	163	0.14	8.9	15.8	10.7	0.93	108	23.8	2.39	18.8
41	1	43	4	0	0	3				4	0	2	800	200	0	1	22.5981	1	0	100	5.8	2.8	2.4	0.5	0.1	0	47.5	41.5	8	2.5	0.8	4.25	147	43	101.1	34.6	343	52.2	14.2	232	0.22	9.3	16	9.9	0.86	117.4	24.3	2.39	18.1
42	1	60	4	0	0	3				3	1	2	600	200	1	1	22.231	1	0	100	5.9	3.3	1.8	0.6	0.2	0	55.9	30.5	10	3	0.6	3.66	131	39	106.6	35.8	335	61.2	15.7	154	0.16	11.6	16.2	10.7	0.93	108	25.9	2.39	18
43	1	44	3	0	0	3	1	0	0	1	0	2	200	200	1	1	19.3792	1	0	100	5.1	3.3	1.4	0.4	0.1	0	63.8	27	7.7	1.3	0.2	5.47	138	42.5	77.8	25.2	324	64.7	23.2	202	0.18	9.1	15.5	10.1	0.88	114.9	25.1	2.03	17.2
44	1	55	4	1	0	3				1	0	3	165	165	1	1	21.6263	1	1	90	4.1	1.8	1.8	0.4	0.1	0	44.4	42.4	10.4	2.3	0.5	4.16	117	35.4	85.2	28.2	331	74.6	23.6	125	0.12	9.4	15.8	0.94	107	26.1	2.77	18.3	0.59
45	2	49				3	0	0	0	7	0	4	1400	200	1	1	22.4813	1	0	100	4.2	2.1	1.5	0.5	0	0	50.7	36.2	12.6	0.3	0.2	3.71	86	27.3	73.4	23.1	314	52.8	19.4	278	0.26	9.3	15.9	10.9	0.95	105.9	21.7	2.39	17.4
46	2	46	3	1	0	3				2	0	3	360	180	0	1	23.1473	1	0	100	4.4	1.9	1.9	0.5	0.1	0	42.5	42.3	11.7	2.9	0.6	3.61	116	33.4	92.6	32.1	347	64.3	18.9	136	0.12	8.6	16.4	10.9	0.95	105.9	24.1	2.74	17.6
47	1	70				3				4	1	4	720	180	1	1	22.3081	2	0	100	5.5	3.1	1.6	0.5	0.3	0	56.6	28.5	9.7	4.6	0.6	4.07	144	42	103.1	35.4	343	66.6	17.7	112	0.14	12.5	16.5	10.1	0.88	114.9	25.7	3.35	17.2
48	1	53	4	1	0	3	0	0	0	5	0	3	1000	200	1	1	22.2753	1	0	100	6.7	4.5	1.5	0.5	0.1	0	67.5	22.4	7.4	2.2	0.5	5.01	115	37.4	74.6	22.9	308	57.6	21.5	255	0.24	9.2	15.7	10.3	0.89	112.5	25.4	1.98	17.5
49	1	57	3	1	0	3				3	1	3	420	140	1	1	22.6474	1	0	100	4.4	2.3	1.4	0.6	0.1	0	51.8	32.2	12.9	2.2	0.9	3.3	104	31.3	95	31.5	331	57.1	16.4	124	0.14	10.4	16.6	10.5	0.91	110.2	24.8	3.49	17.1
50	1	65	2	1	0	3				2	0	3	400	200	1	1	22.8164	1	0	100	3	1.3	1.3	0.4	0.1	0	43.2	43.1	11.8	1.6	0.3	4.31	138	40.7	94.5	32	339	50.1	14.5	83	0.09	11	16.8	11.8	1.03	95.4	26.3	2.4	16.6
51	1	43	4	0	0	3				5	0	2	1000	200	0	1	20.6612	1	0	90	4.6	2.1	2	0.3	0.1	0	45	44.4	7.4	2.2	1	4.25	147	42.6	100.2	34.6	345	50.8	13.9	222	0.29	15.8	2.39	9.7	0.84	120	25.9	2.73	17.2
52	1	56	3	1	0	3				2	0	2	300	150	1	1	22.5981	1	1	100	4.2	2.5	1.1	0.5	0.1	0	57.9	26.8	12.6	2.1	0.6	3.35	97	29.6	88.5	28.9	326	52.6	15.9	227	0.2	8.9	16	11.4	0.99	100.9	26.5	3.57	16
53	1	66	4	1	0	3				4	1	3	520	130	1	1	21.3039	1	0	100	4.6	2.3	1.5	0.6	0.3	0	49.1	32.3	12.4	5.4	0.8	4.47	117	36.1	80.7	26.2	325	52.4	17.4	298	0.24	8.1	15.6	10.2	0.88	113.7	24.2	2.61	15.3
54	1	63	3	1	0	3				3	1	3	600	200	1	1	25.0399	1	0	100	4.2	2.3	1.5	0.3	0.1	0	55	34.6	7	2.9	0.5	4.42	127	38.3	86.6	28.8	332	46.4	14.7	219	0.23	10	16.3	10.3	0.89	112.5	26.3	2.16	16.2
55	1	72	4	0	0	3				4	0	2	720	180	0	1	20.202	2	0	100	4.3	2.6	1	0.5	0.2	0	60.2	23	10.9	5.2	0.7	3.97	134	39.9	100.5	339	337	50.2	13.7	143	0.15	10.3	16.5	10.5	0.91	110.2	23.6	2.25	17.3
56	1	70				3				6	1	4	1080	180	0	1	22.3081	2	0	100	5.4	3.2	1.7	0.5	0.2	0	57.9	30.8	8.4	2.8	0.1	4.44	151	44.8	100.8	33.9	336	50.2	13.5	109	0.14	13.1	16.7	9.9	0.86	117.4	27.3	3.17	17.5
57	1	56				2	1	0	0	3	0	4	450	150	0	1	25.6055	1	0	100	7.5	5.2	1	1	0.3	0.1	68.9	13.2	13.5	3.7	0.7	3.75	114	35.2	93.7	30.5	325	51.8	15.1	204	0.24	11.4	16	14.1	1.23	69.1	33.1	6.83	14.3
58	1	62	3	0	0	3				1	0	2	200	200	0	1	21.1073	1	0	100	4.3	3	1	0.3	0.1	0	68.7	23	6.7	1.1	0.5	3.07	108	32.4	105.6	35.3	334	56.6	14.6	84	0.12	14.1	17.2	10.1	0.88	114.9	23.9	2.69	17.9
59	1	56	3	1	0	3				2	0	3	300	150	0	1	22.5981	1	1	100	4.8	2.7	1.3	0.6	0.2	0.1	55.9	26.2	13.3	3.5	1.1	3.36	95	29.4	87.4	28.3	323	53.5	16.3	327	0.27	8.4	16	11.9	1.04	94	24.8	2.82	15.1
60	1	66	4	1	0	3				5	1	3	650	130	0	1	21.3039	1	0	100	4.5	2.3	1.4	0.5	0.3	0	50.1	31.7	11.6	5.8	0.8	4.51	123	37.2	82.4	27.2	330	56.2	18.4	259	0.22	8.3	15.9	9.8	0.84	118.7	22.9	2.26	17
61	1	54				2	1	0	0	8	0	4	1040	130	1	1	23.03	1	0	100	7.7	4.9	1.9	0.7	0.2	0.1	63.5	25	8.4	2.4	0.7	4.07	135	40.3	99	33	334	47.9	13.2	200	0.21	11	16.2	10.5	0.91	110.2	25.6	3.62	14.3
62	2	31				1	0	0	0	1	0	4	200	200	0	1	24.8016	1	0	100	3.6	2.1	1	0.3	0.3	0	56.8	27.3	7	8.2	0.7	3.86	130	38.2	99.1	33.7	341	48.4	13.4	200	0.2	10.4	16.2	10.9	0.94	105.9	30.8	3.23	14.5
63	1	68	4	2	1	5	0	0	0	3	1	4	390	130	1	1	22.0386	1	0	100	18.1	15.1	2.1	0.9	0	0	83.5	11.5	4.7	0.1	0.2	4.53	143	42.8	94.6	31.5	333	55.1	15.5	216	0.27	14.6	16.7	9.7	0.83	120	23.4	2.11	19.1
64	1	70	4	0	0	3				1	0	2	200	200	1	1	24.0238	2	0	100	5.2	2.7	1.7	0.6	0.2	0.1	52.6	31.9	10.8	3.6	1.1	3.52	96	29.7	84.4	27.2	323	49.8	16.3	152	0.12	8.1	16.1	10.8	0.94	107	24.4	3.29	17.9
65	2	56								3	0	4	600	200	1	1	23.8343	1	1	100	5.2	2.7	1.7	0.6	0.2	0.1	52.6	31.9	10.8	3.6	1.1	3.52	96	29.7	84.4	27.2	323	49.8	16.3	152	0.12	8.1	16.1	10.8	0.94	107	24.4	3.29	17.9
66	1	66	2	0	0	3				5	1	1	1150	230	1	1	25.4694	1	0	100	5.4	3.8	1	0.4	0.2	0	71.2	17.7	7.2	3.3	0.6	3.49	110	32.2	92.1	31.6	343	72.7	21.3	124	0.13	10.3	17	10.8	0.94	107	24	2.91	15.5
67	1	72	4	0	0	3				5	0	2	900	180	0	1	20.202	2	0	100	3.8	2	1.2	0.5	0.2	0	52.4	30.1	13.2	4	0.3	4	136	0.14	100.7	34	337	52	14.3	135	0.14	10.5	16.6	11.5	1	100	25.6	2.65	17.7
68	1	68					0	0	0	5	0	4	1000	200	1	1	20.8307	1	0	100	5.7	3.1	1.9	0.6	0.1	0	53.7	33.5	10.1	2	0.7	4.55	123	38.2	84	27	322	47.6	15.6	95	0.12	12.8	16.3	11.3	0.98	101.9	26.8	2.89	16.5
69	1	65	2	1	0	3				5	0	3	1000	200	1	1	22.8164	1	0	100	2.2	0.9	1	0.3	0	0	41.4	44.1	13.1	1.2	0.2	4.01	135	40.7	101.4	33.7	332	59.8	16.1	63	0.07	10.2	16.6	11.7	1.02	96.9	25.4	1.92	21.2
70	1	56	3	1	0	3				4	0	3	600	150	0	1	22.5981	1	1	100	4.6	2.3	1.3	0.7	0.2	0	50.2	29.5	14.9	4.9	0.5	3.25	95	29.2	89.8	29.1	325	57.6	17.6	274	0.23	8.4	15.9	11.9	1.04	94	28.3	3.17	15.5
71	1	65	3	2	0	3	0	0	0	2	1	3	300	150	0	1	23.8087	1	0	100	4.4	2.7	1.3	0.4	0.1	0	60.9	28.8	8.3	1.3	0.7	4.33	115	34.2	78.9	26.5	336	50.4	17.8	205	0.23	10.8	16.3	10.7	0.93	108	25.1	2.99	16.4
72	1	68	4	2	1		0	0	0	4	1	4	520	130	0	1	22.0386	1	0	100	15.9	13.6	1.8	0.5	0	0	85.8	11.1	2.9	0	0.2	4.46	143	43.6	97.8	32	328	51.4	14.4	219	0.29	15.3	16.1	9.8	0.84	118.7	24.2	2.06	17.8
73	2	54								3	1	4	360	120	0	1	23.5556	1	0	100	6.5	4	1.9	0.5	0.1	0	61.7	29.3	7.5	1	0.5	3.88	107	33.4	86	27.6	320	56.4	18.1	222	0.2	10.1	15.7	9.8	0.84	118.7	24.5	2.43	17.3
74	2	51	4	0	0	2	0	0	0	2	0	2	300	150	0	1	19.6506	3	0	100	4.2	2.3	1.5	0.4	0.1	0	54.1	35.7	8.3	1.4	0.5	3.44	102	31.1	90.4	29.6	328	61.8	18.2	222	0.22	9.5	15.9	10.5	0.91	110.2	24.7	2.99	16
75	1	56	3	1	0	3				5	0	3	750	150	0	1	22.5981	4	1	90	4.6	1.9	1.5	0.6	0.6	0	42	33.4	12.2	12	0.4	3.12	95	29.4	94.3	30.4	323	64	18.6	226	0.19	8.5	15.8	10.8	0.94	107	26.5	3.55	15.3
76	1	54	3	0	0	3	0	0	0	1	1	2	190	190	0	1	19.6283	1	0	90	4.9	2.9	1.4	0.5	0.1	0	58.6	28.1	10.8	2	0.5	3.68	118	35.6	96.8	32.1	331	63.7	17.9	215	0.2	9.5	15.9	11.1	0.96	103.9	24.8	2.27	15.8
77	1	63				2	0	0	0	5	0	4	1150	230	1	1	18.3391	1	0	50	4.6	2.2	1.9	0.4	0	0	48.9	41.5	8.7	0.7	0.2	4.03	137	40.1	99.6	34.1	343	62.1	17.3	114	0.1	9.4	16.2	10.7	0.93	108	23.9	3.52	18
78	1	55	4	1	0	3				2	0	3	400	200	1	1	25.6055	1	0	100	4.8	3.3	1.1	0.3	0.1	0	68.1	23.6	6.2	1.9	0.2	3.9	136	38.3	98.2	34.8	355	61.1	16.6	118	0.14	11.9	16.9	11	0.96	104.9	24.9	2.57	14.1
79	2	72	3	0	0	3				4	1	2	720	180	1	1	21.2279	2	0	100	3.7	1.9	1.4	0.3	0.1	0	51.2	36.7	9	2.7	0.4	3.58	111	32.7	91.3	31.2	341	68.1	20.2	88	0.09	10	16.6	13.6	1.03	95	37.3	2.55	16.9
80	1	65	2	1	0	3				0	0	3	200	200	0	1	22.8164	1	0	100	3	1.5	1.1	0.3	0.1	0	49.4	38	9	3.2	0.4	3.73	122	35	93.7	32.7	349	45.7	13	98	0.1	9.9	16.4	11.4	0.99	100.9	25.3	2.21	15.5
81	1	76	4	2	0	3				1	1	3	200	200	1	1	18.7109	2	0	100	3.7	1.6	1.6	0.4	0.2	0	41.5	42.1	9.6	6.2	0.6	4.18	132	39.9	95.5	31.7	332	50	14.3	129	0.13	9.9	16.4	11.1	0.96	103.9	25.1	2.46	15.6
82	1	77	3	1	0	3				5	1	3	1000	200	1	1	23.03	2	0	100	4.5	2.5	1.4	0.5	0.2	0	55.7	30.3	10.3	3.2	0.5	4.35	141	42.4	97.6	32.4	332	55.4	15.7	155	0.15	10.3	16.2	10.8	0.94	107	26.5	3.64	16.9
83	1	54				2	1	0	0	3	0	4	390	130	1	1	23.03	1	0	100	8	4.9	2.2	0.6	0.2	0.1	61.6	27.8	6.9	2.8	0.9	3.5	115	33.7	96.3	32.9	342	56.8	15.9	155	0.19	12.1	16.3	10.3	0.89	112.5	23.2	3.62	16.6
84	2	72	3	0	0	3				3	1	2	540	180	1	1	21.2279	2	0	100	4	1.9	1.7	0.2	0.1	0	48.1	43.5	6.1	1.9	0.4	3.66	110	32.1	87.9	30	341	66.9	20.3	100	0.1	10	16.2	10.4	0.9	111.4	25.5	2.35	18
85	2	61	4	0	0	3				0	0	2	200	200	0	1	22.5827	1	0	100	5.2	2.4	1.9	0.4	0.4	0	47	37.5	7.3	7.7	0.5	4.08	127	35.7	87.4	31	355	43.8	13.5	263	0.23	8.8	15.8	10.9	0.95	105.9	24.4	2.61	18.2
86	1	54	4	0	0	2				3	0	2	600	200	1	1	21.4619	1	0	100	5.2	1.9	2.5	0.6	0.2	0	36.3	48.5	11.8	3.1	0.3	3.22	112	32.4	100.7	34.8	345	77.6	20.8	108	0.11	10.1	17	10.8	0.94	107	22.5	2.57	15.1
87	1	65	2	1	0	3				4	0	3	800	200	1	1	21.9713	1	0	100	3	1.6	1	0.3	0.1	0	55.2	33.6	9	1.7	0.5	4.18	139	41.1	98.4	33.3	338	54.5	15.2	84	0.1	11.7	17.4	11.8	1.03	95.4	24.8	2.43	16.3
88	2	74	3	2	0	3				4	0	3	600	150	1	1	21.299	2	0	85	2.9	0.9	1.5	0.3	0.1	0	32.1	53.4	11.8	2	0.7	3.55	111	33.2	93.6	31.2	333	70.3	21	136	0.12	8.9	15.9	10.3	0.89	112.5	25.6	1.98	18
89	2	77				4				5	1	4	1000	200	1	1	22.4766	2	0	100	3	1.3	1.2	0.4	0	0	43.9	40.1	14.7	0.9	0.4	2.88	95	28.7	99.5	32.8	330	52.8	14.7	132	0.13	9.9	16.6	10.9	0.95	105.9	24.4	2.46	18
90	1	54	4	0	0	2				4	0	2	800	200	0	1	21.4619	1	0	100	4.1	1.2	2.3	0.5	0.1	0	29.4	56.2	11.1	3.1	0.2	2.94	104	30.9	105	35.3	336	84.4	21.6	67	0.07	10.8	16.8	10.8	0.94	107	25.3	2.26	17.1
91	2	52	4	0	0	3				3	0	2	540	180	1	1	25.4581	1	0	100	2.9	1.2	1.4	0.3	0	0	40	48.2	9.6	1.5	0.7	4.51	131	38.2	84.8	84.8	29	343	12.9	188	0.16	8.9	15.7	10.5	0.91	110.2	23.9	2.06	18.3
92	1	77	3	1	0	3				3	1	3	600	200	1	1	22.1443	2	0	100	4.7	2.7	1.3	0.5	0.2	0	56.9	28.5	10.1	3.9	0.6	4.37	141	40.6	92.8	32.3	348	45.5	13.4	153	0.16	10.6	16.5	11.6	1.01	98.4	28.2	3.38	17.7
93	1	71	4	1	0	3				2	0	3	400	200	0	1	21.2953	2	0	100	4	2.4	1.2	0.3	0.2	0	58.9	29.1	6.6	4.3	1.1	3.72	117	33.7	90.5	31.5	347	55.8	16.9	132	0.13	9.3	15.7	10.3	0.89	112.5	26.8	3.05	15.7
94	1	54	4	0	0	2				5	0	2	1000	200	0	1	21.2228	1	0	100	5.6	2.3	2.4	0.7	0.1	0	41.8	43	12.3	2.6	0.3	2.82	102	30.8	109.3	36	330	78.2	19.3	165	0.16	9.8	16.8	11.4	0.99	100.9	25.9	2.19	16.9
95	1	68					0	0	0	5	0	4	1000	200	1	1	20.8307	1	0	100	4.7	2.8	1.4	0.4	0.1	0	59.7	30.5	7.5	1.4	0.9	4.39	118	36	82.1	27	328	46	15.4	91	0.12	12.7	16.4	12.3	1.07	88.5	27.4	3.81	15.4
96	2	54	3	2	0	2				3	0	3	540	180	0	1	21.573	1	0	100	5	2.4	2.1	0.3	0.1	0	48.7	42.3	6	0.1	0	4.2	129	38.5	91.7	30.8	336	41.8	12.4	222	0.23	10	16	10.4	0.9	111.4	30.6	2.53	17.5
97	2	56	3	1	0	3	0	0	0	4	0	3	800	200	0	1	23.03	1	0	100	9.3	0.6	7.1	1.2	0.3	0.1	6.9	76.6	13.1	2.8	0.6	3.79	130	38.9	102.7	34.3	334	64.7	17.4	110	0.11	9.7	16.2	10.8	0.91	119.5	24.7	2.7	15.5
98	2	56	3	1	0	3	0	0	0	5	0	3	1000	200	0	1	22.8529	1	0	100	25.9	1.3	1.4	22.7	0.4	0	4.9	5.5	87.8	1.6	0.2	3.53	123	37.3	105.9	34.8	329	70	18.3	91	0.08	8.9	16.1	10.4	0.86	131.5	25.8	2.79	16.6
99	2	56	3	1	0	3	0	0	0	3	0	3	600	200	0	1	22.6757	1	0	100	3.1	1	0.4	1.7	0	0	32.8	11.3	55.1	0.5	0.3	3.79	123	35.7	94.3	32.3	345	78.3	23	135	0.11	8.4	15.9	10.5	0.91	110.2	22.8	2.22	14.8
100	2	55	3	1	0	3	0	0	0	2	0	3	400	200	0	1	22.6757	1	0	100	2.7	1	0.4	1.4	0	0	35.9	13.3	49.7	0.7	0.4	3.54	118	35.2	99.4	33.4	335	79.2	22	107	0.1	8.9	16.3	10.4	0.9	111.4	24.2	2.55	14.6
101	2	55	3	1	0	3	0	0	0	1	0	3	200	200	0	1	21.9671	1	0	100	3.7	1.1	0.3	2.3	0	0	28.9	8.9	61.5	0.6	0.1	3.37	111	34.6	102.7	33.1	321	60.3	16	176	0.18	10.3	17.1	10.5	0.91	110.2	23.8	2.73	15.1
102	1	66	4	0	0	3	0	0	0	5	0	2	600	120	1	1	16.7062	1	0	90	2.8	0.4	2	0.4	0.1	0	13.4	69.7	12.6	3.7	0.6	3.31	109	33.3	100.6	32.8	327	52.8	14.4	139	0.14	9.9	16.4	12.2	1.07	89.8	27.3	1.47	15.8
103	2	27					1	0	0	1	0	4	100	100	1	1	15.5896	2	1	100	3.2	0.1	1.4	1.5	0.1	0	4.2	45.4	46.8	2.4	1.2	3.19	98	28.7	90.1	30.8	341	47.6	14.7	132	0.16	12	16.5	10.4	0.9	111.4	27.1	2.43	15.1
104	2	58	4	1	5	3	0	0	0	2	0	3	400	200	1	1	20.7031	1	1	100	2.5	0.3	1.1	1	0.1	0	12.2	43.2	41.5	2.3	0.8	3.7	110	33.6	90.7	29.8	327	66.6	20.8	152	0.14	9.3	15.9	10.8	0.93	107	24.9	2.25	14.5
105	2	58	4	1	5	3	0	0	0	3	0	3	600	200	1	1	21.4844	1	1	100	3.1	1	0.4	1.7	0	0	32.8	11.3	55.1	0.5	0.3	3.79	123	35.7	94.3	32.3	345	78.3	23	135	0.11	8.4	15.9	10.5	0.91	110.2	22.8	2.22	14.8
106	2	58	4	1	5	3	0	0	0	4	0	3	800	200	1	1	21.6797	1	1	100	2.7	1	0.4	1.4	0	0	35.9	13.3	49.7	0.7	0.4	3.54	118	35.2	99.4	33.4	335	79.2	22	107	0.1	8.9	16.3	10.4	0.9	111.4	24.2	2.55	14.6
107	2	58	4	1	5	3	0	0	0	5	0	3	1000	200	1	1	21.875	1	1	100	3.7	1.1	0.3	2.3	0	0	28.9	8.9	61.5	0.6	0.1	3.37	111	34.6	102.7	33.1	321	60.3	16	176	0.18	10.3	17.1	10.5	0.91	110.2	23.8	2.73	15.1
108	2	58	4	1	5	3	0	0	0	6	0	3	1200	200	1	1	21.4844	1	1	100	3.3	1.1	0.4	1.9	0	0	31.7	10.7	56.2	1.2	0.2	3.66	121	35.7	97.6	32.9	339	45.5	12.8	77	0.07	8.8	16.8	10.8	0.94	107	26.1	3.06	15.6
109	2	68	4	1	0					4	0	2	480	120	1	1	16.7969	1	1	100	4.8	1.3	0.5	2.9	0.1	0	27	10.3	60.8	1.3	0.6	5.34	130	40.1	75.1	24.3	324	61.5	22.9	318	0.27	8.4	15.1	10	0.83	138.5	24.8	2.74	15.9
110	1	72	4	2	1	3	1	0	0	4	0	4	800	200	1	1	19.3698	2	1	100	5.9	1.7	0.6	3.5	0.2	0	28.9	9.3	58.9	2.8	0.1	4.83	168	49.4	102.3	34.8	340	48.9	13.2	153	0.17	10.9	16.9	10.1	0.84	133.3	27.7	2.99	17.9
111	1	66	4	1	0	3				3	0	3	600	200	0	1	25.7657	1	1	100	4.2	1	0.4	2.7	0.2	0	23.4	8.8	63.1	3.8	0.9	3.82	119	36	94.3	31.1	331	55.5	16.1	175	0.15	8.8	15.7	10.8	0.9	119.2	28.7	2.85	16.3
112	2	75	3	1	1	3				5	1	4	750	150	1	1	16.8242	2	1	100	2.7	0.2	1.3	1	0.2	0	7.6	48.6	37.7	5.8	0.3	3.93	126	37.8	96.2	32.1	333	58	16.9	76	0.07	8.9	16.2	10.8	0.9	121.7	27.3	2.9	15
113	1	64	3	1	0	3	1	0	0	3	0	3	450	150	0	1	21.4619	1	0	100	8.7	6.6	1.1	0.7	0.3	0	75.8	12.4	8.5	3.1	0.2	4.38	136	40.4	92.2	31	337	45.6	13.7	176	0.18	11.5	17	11.5	0.96	107.1	24.2	5.28	13.3
114	1	61	3	0	4	3				5	0	2	1000	200	0	1	18.5132	1	0	100	6.2	0.7	3.5	1.2	0.7	0	11.8	57.2	19.4	11	0.6	3.5	113	32.3	92.3	32.3	350	48.6	14.5	136	0.15	10.9	11.9	11.8	1	99.8	24.5	2.36	14.8
115	1	60	3	0	4	3				4	0	2	800	200	0	1	18.5132	1	0	100	3.9	1	0.4	2.2	0.2	0	27	9.2	57.5	5.9	0.4	3.16	98	30.7	97.1	30.9	319	79.3	22.5	82	0.07	8	15.8	12	1.11	82.7	24.6	2.46	16.1
116	1	60	3	0	4	3				3	0	2	600	200	0	1	18.5132	1	0	100	4.3	0.8	0.4	2.8	0.2	0	19	9.6	65.7	5.1	0.6	3.58	106	32.4	90.4	29.5	327	74.4	23	89	0.07	7.9	15.8	11.8	1.03	95.4	24.4	2.54	15.6
117	1	72	4	0	0	2				2	0	4	360	180	1	1	21.6128	2	1	100	3.8	0.3	1.9	1.4	0.1	0	8.3	50.5	37.8	3	0.4	3.65	116	34.3	94.1	31.8	338	61	18.4	129	0.14	10.9	16.3	11.9	1.01	98.1	26.2	1.74	17.1
118	2	54	5	5	1	3				3	1	4	540	180	1	1	21.2306	1	0	100	5.5	0.6	2.9	1.9	0.2	0	10.9	51.7	34.3	2.7	0.4	3.92	125	38.7	98.8	31.8	323	55.6	15.4	260	0.23	9.3	15.9	10.2	0.84	136.8	25.1	3.32	15.6
119	2	54	5	5	1	3				4	1	4	720	180	1	1	21.2306	1	0	100	5.2	1.9	0.6	2.6	0.1	0	35.9	11.1	50.1	2.7	0.2	3.91	126	38.8	99.3	32.2	325	53.1	14.7	272	0.22	9.4	16.1	10.1	0.83	139.6	25.6	3.07	16.3
120	2	55	5	5	1	3				5	1	4	900	180	1	1	21.2306	1	0	100	4.6	1.6	0.5	2.3	0.2	0	34.9	9.9	51.2	3.8	0.2	3.85	126	39.2	101.9	32.8	321	54.7	14.7	192	0.18	9.7	16	10.1	0.84	136.8	23.9	2.79	16
121	2	55	5	5	1	3				6	1	4	1080	180	1	1	21.2306	1	0	100	5.8	1.8	0.7	3.1	0.1	0	31.9	11.2	54.2	2.4	0.3	4.19	133	42.5	101.5	31.8	313	53.1	14.3	224	0.22	9.7	16.2	10.2	0.85	134.1	24.8	4.49	16.5
122	2	55	5	5	1	3				7	1	4	1260	180	1	1	21.2306	1	0	100	6.2	2.1	0.7	3.3	0.1	0	1.5	10.6	53.5	1.5	0.3	3.85	125	38.6	100.3	32.5	324	51.4	14	198	0.19	9.6	16.3	10.2	0.85	134.1	24.5	3.25	17
123	2	62	4	0	0	3				0	0	2	200	200	0	1	21.9671	1	0	100	4.7	0.3	2.8	1.5	0.1	0	7.2	58.6	32.1	1.7	0.4	3.85	111	34.1	88.7	28.7	326	41.9	12.9	265	0.22	8.5	15.4	11	0.92	115.1	23.7	2.37	14.8
124	2	69	3	1	0	3	0	0	0	6	0	3	1200	200	1	1	19.487	1	0	100	3.2	0.4	1.5	1.2	0.1	0	11.2	46.6	37.6	4.4	0.2	3.12	102	30.7	98.3	32.8	332	48.8	13.5	107	0.13	11.2	17	10.2	0.85	134.1	22.5	2.86	16
125	1	73	3	2	0	3				5	0	4	1000	200	0	1	24.1415	2	0	100	6.2	0.8	4.1	1.1	0.3	0	12.3	65.4	17.4	4.3	0.6	4	106	33.2	83.1	26.5	319	94	31.5	236	0.17	7.9	15.3	10.4	0.86	131.5	27.9	3.32	14.6
126	1	62	1	1	0	3				2	1	3	240	120	0	1	21.2245	1	0	100	7.9	0.4	5.7	1.7	0	0	5.2	72.5	21.6	0.5	0.2	4.02	129	38	94.6	32	339	54.3	16	255	0.2	8.8	16.1	12.5	1.06	88.8	26.7	2.52	15.4
127	1	62	1	1	0	3				3	1	3	360	120	0	1	21.2245	1	0	100	6.2	1.8	0.4	4	0	0	29.2	6.1	64	0.6	0.1	4.15	133	40	96.4	32	333	55.1	15.7	212	0.2	9.3	16.2	12.1	1.02	94.9	26.6	2.66	14.7
128	1	62	1	1	0	3				4	1	3	480	120	0	1	21.2245	1	0	100	7.5	2.1	0.5	4.9	0.1	0	27.6	64.6	64.6	0.7	0	4.29	141	41.4	96.4	32.8	341	52.7	15	241	0.22	9.1	16.2	12.3	1.04	91.8	24.8	2.95	16.4
129	1	62	1	1	0	3				5	1	3	600	120	0	1	21.2245	1	0	100	5.5	2.1	0.4	2.9	0	0	38.6	8	52.5	0.7	0.2	3.69	120	35.6	96.5	32.5	337	49.5	14.1	193	0.19	9.6	16.5	12.6	1.07	87.4	26.5	2.32	17
130	1	72	5	5	1	1	0	0	0	2	1	4	400	200	0	1	21.7738	2	1	100	6.4	1.1	4.6	0.7	0	0	17.3	71.8	10.1	0.7	0.1	3.62	102	31.4	86.8	28.1	325	47.5	15.5	248	0.22	8.9	16	11.8	0.99	101.6	26	4.9	14.1
131	1	72	5	5	1	1	0	0	0	3	1	4	600	200	0	1	21.7738	2	1	100	5.4	1	0.6	3.6	0.2	0	18.5	10.8	66.8	3.7	0.2	3.28	96	30	91.6	29.2	320	67.2	20.8	210	0.19	9	15.8	11.2	0.94	113	26.8	3.26	15
132	1	72	5	5	1	1	0	0	0	1	1	4	200	200	0	1	21.7738	2	1	100	8	1.1	1.1	5.5	0.3	0	14	14.1	68.7	3.1	0.1	4.24	119	36.5	86.2	28.1	326	42.4	13.6	229	0.19	8.1	15.6	11.8	0.99	101.6	27.1	4.63	13
133	2	59	3	0	0	3				4	0	2	480	120	0	1	26.9127	1	0	100	3.9	0.5	1.6	1.7	0.1	0	12.6	40.8	44.3	2.1	0.2	3.62	106	33	91.2	29.3	321	49.1	14.6	137	0.18	12.2	16.6	9.9	0.82	145.4	23.9	3.39	16.4
134	1	52	4	0	0	1	0	0	0	2	1	2	400	200	1	1	24.6094	1	1	100	6.7	0.8	4.4	1.5	0.1	0	12	64.8	21.6	1.2	0.4	4.12	133	40.3	97.8	32.2	330	66.7	18.5	191	0.21	11.6	16.6	9.8	0.81	145.4	25.1	2.19	15.5
135	1	58	3	0	1	3				2	1	4	418	209	0	1	17.9151	1	1	100	3.8	0.4	2.3	0.9	0.1	0	10.7	61.7	24.7	2.3	0.6	3.65	114	33.5	91.8	31.1	340	43.3	13.2	225	0.18	7.9	15.6	11	0.92	115.1	23.8	3.43	14.8
136	1	51	3	1	1	3	0	0	0	3	0	4	600	200	0	1	22.8374	1	1	100	4.2	0.5	2.8	0.9	0	0	12	65.3	21.7	0.9	0.1	5.09	142	42.9	84.2	28	331	42.8	14.1	195	0.18	9.1	15.8	11.6	0.98	103.3	27.4	4.39	13.7
137	1	51	3	1	1	3	0	0	0	4	0	4	800	200	0	1	22.4913	1	1	100	4	1	0.5	2.5	0.1	0	24	11.9	62.4	1.4	0.3	5.34	148	45.1	84.4	27.7	328	52	17.1	154	0.15	10	16.4	11.1	0.93	115.1	28.1	2.9	15.9
138	1	51	3	1	1	3	0	0	0	5	0	4	1000	200	0	1	22.4913	1	1	100	3	0.7	0.4	1.9	0.1	0	24.2	12.3	61.9	1.5	0.1	4.67	133	40.3	86.2	28.4	330	53.1	17	160	0.16	10.1	16.3	11.1	0.93	115.1	27.7	3.41	15.8
139	1	51	3	1	1	3	0	0	0	6	0	4	1200	200	0	1	22.4913	1	1	100	3.9	1.1	0.4	2.3	0.1	0	27.8	10.9	59	2.1	0.2	4.76	142	42.6	89.5	29.8	333	53.4	16.4	148	0.15	10.2	16.4
140	2	68	3	2	0	1				2	1	3	240	120	0	1	27.3438	1	0	100	4.8	0.5	2.9	1.3	0.1	0	10.5	60.9	26.9	1.5	0.2	4.96	130	39.6	79.9	26.2	328	48.5	17.6	187	0.16	8.8	15.6	9.3	0.77	161.7	22	3.09	16.1
141	1	65	4	2	5	3				1	1	4	150	150	1	1	22.5309	1	0	100	3.1	0.5	0.7	1.6	0.2	0	16.1	23.4	53.3	6.6	0.6	4.29	102	33.2	77.4	23.9	307	63.8	23	210	0.15	7.7	15.1	11.6	0.97	105.2	25.4	3.01	15.1
142	1	65	4	2	5	3				2	1	4	300	150	1	1	22.5309	1	0	100	8.1	0.9	4.8	2.2	0.1	0	11	60	27.2	1.6	0.2	4.47	103	30.8	77.9	24.7	311	73.9	25.7	149	0.12	8.2	15.2	11.3	0.95	109	26.3	3.32	15.7
143	1	67	4	0	0	3				3	1	3	360	120	0	1	20.3816	1	0	100	4.7	0.4	2.5	1.6	0.3	0	8.5	52.2	33	5.8	0.5	3.96	103	30.8	77.9	26.1	334	52.4	18.5	161	0.06	9.5	15.9	10.9	0.91	117.2	26.3	3.36	13.9
144	2	61	4	1	1	2				8	1	4	1200	150	1	1	23.0469	1	1	100	5.8	0.2	3.8	1.5	0.3	0	4.1	65.8	25.3	4.3	0.5	4.33	126	38.4	88.6	29.2	328	42.2	13.1	190	0.17	8.8	15.7	11.1	0.93	113	24.5	2.56	16.4
145	2	76	5	5	1		1	0	0	2	0	4	200	100	0	1	25.3331	2	0	95	8.9	0.9	5.4	2.3	0.3	0.1	10.4	60.4	25.3	2.8	1.1	3.58	111	34.8	97.1	31.1	319	57.7	16.4	279	0.25	9	15.8	10.7	0.9	121.7	22.2	2.91	17.9
146	1	79	4	2	0	2				8	1	3	1200	150	0	1	24.9135	2	0	100	6.4	0.5	3.7	1.9	0.2	0	8.2	58.4	30.6	2.5	0.3	4.27	133	39.9	93.4	31	333	47.2	13.8	164	0.18	11.1	16.9	11.1	0.93	113	28	2.48	16.6
147	1	79	4	2	0	2				7	1	3	1050	150	0	1	24.9135	2	0	100	5.9	1.7	0.6	3.4	0.1	0	29.2	10.6	58.1	1.5	0.6	3.54	324	37.2	105.1	35	333	77.3	20.3	206	0.18	10.2	16.6	11.1	0.93	113	26.4	3.01	15.5
148	1	79	4	2	0	2				6	1	3	900	150	0	1	24.9135	2	0	100	6.2	2	0.7	3.3	0.1	0.1	32.9	10.6	54.1	1.6	0.8	3.51	124	37	105.4	35.4	335	81.9	21.3	198	0.19	10.1	16.6	10.4	0.96	107.8	24.9	2.36	16.1
149	1	79	4	2	0	2				5	1	3	750	150	0	1	24.9135	2	0	100	9.7	2	0.8	6.8	0.1	0	20.2	8.5	70.2	0.8	0.3	3.74	127	37.7	100.9	34	337	85.2	23.2	218	0.19	10.3	16.5	10.7	0.99	101.6	24.1	2.79	15.5
150	1	79	4	2	0	2				4	1	3	600	150	0	1	24.9135	2	0	100	7.7	2.2	0.7	4.6	0.1	0.1	29.1	9.3	59.9	1.1	0.6	4.05	127	39.1	96.5	31.3	325	84.6	24.3	246	0.23	9.4	16	10.3	0.95	110	24.5	2.89	15.5
151	1	79	4	2	0	2				3	1	3	450	150	0	1	24.9135	2	0	100	7.3	2.2	0.7	4.2	0.1	0	30.5	9.5	57.8	1.7	0.5	4.04	126	37	91.7	31.1	341	75.5	23.1	201	0.19	9.4	16.2	10.4	0.96	107.8	25.3	2.57	15.9
152	1	57	3	1	0					2	0	3	460	230	0	1	23.8367	1	1	100	6.2	0.4	4.1	1.6	0.1	0	6.1	66.2	25.7	1.6	0.4	3.74	106	32.6	87.1	28.5	325	46.6	14.8	172	0.17	9.6	16	11	0.92	115.1	27.6	4.26	16.6
153	1	65	4	2	5	3				3	1	4	450	150	1	1	22.6852	1	1	100	7.8	1	4.9	1.7	0.1	0	13	62.6	22.3	1.8	0.3	4.42	113	36.3	82.2	25.6	311	74.7	25.1	178	0.15	8.2	15.2	11	0.92	115.1	27	2.65	16.4
154	2	70	3	1	1	3				8	0	4	1200	150	0	1	27.5556	2	0	100	6.7	2.9	0.9	2.9	0.1	0	42.6	12.7	43.1	1.4	0.2	4.05	127	38.8	95.7	31.4	327	56.5	16.3	138	0.16	11.3	16.1	12.8	1	100	29.1	4.31	18.6
155	2	70	3	1	1	3				7	0	4	1050	150	0	1	26.8352	2	0	100	9.3	1.6	1.1	6.5	0	0	17.6	11.5	70.7	0	0.2	3.59	116	34.9	97.1	32.3	333	60	17.1	107	0.11	10.4	16.5	10.6	0.89	124.1	22.5	3.47	15.4
156	2	70	3	1	1	3				6	0	4	900	150	0	1	27.5556	2	0	100	6.9	2.9	0.8	3.1	0.1	0	42.5	11	45	1.2	0.3	4.68	145	43.3	92.6	31	335	58.1	17.3	185	0.19	10.1	15.9	10.4	0.86	131.5	20.6	3.54	15.3
157	2	72	4	2	1	2				4	1	4	600	150	1	1	25.3333	2	0	100	2.6	0.3	1.7	0.5	0.1	0	12.1	64.4	17.9	4.9	0.7	3.48	107	32.8	94.2	30.7	326	68.5	20.2	77	0.07	8.9	16.1	10.7	0.9	121.7	25.2	2.61	16.4
158	1	61	2	1	0	3	1	0	0	5	1	3	1000	200	1	1	21.6296	1	0	100	4.8	0.6	3.2	0.9	0.1	0	12.2	67.1	18.7	1.1	0.9	4.3	145	43.3	100.8	33.7	335	58.3	15.9	199	0.23	11.7	16.5	9.8	0.81	148.4	24.6	2.33	17.8
159	2	42	3	1	0	2				5	0	3	950	190	0	1	18.4425	1	0	100	4.9	0.4	3.4	1	0.1	0	8.1	69.7	20.4	1.4	0.4	3.03	96	30	98.9	31.7	320	101.9	28.2	151	0.13	8.4	15.6	12.7	1	100	31.2	3.05	16.7
160	2	42	3	1	0	2				4	0	3	760	190	0	1	19.1953	1	0	100	4.9	1	0.4	3.4	0	0	20.69	8.8	69.2	0.7	0.4	2.96	90	28.2	95.2	30.3	319	89.8	26.2	161	0.14	8.5	15.5	10.4	0.87	128.9	24.2	1.4	18.7
161	2	42	3	1	0	2				3	0	3	570	190	0	1	19.1953	1	0	100	3.1	1.1	0.3	1.6	0	0	37	9.6	51.8	1.1	0.5	3.12	91	28.8	92.4	29.3	316	77.3	23.2	158	0.14	8.9	15.9	11	0.92	115.1	24.5	1.4	16.3
162	2	42	3	1	0	2				2	0	3	380	190	0	1	18.8189	1	0	100	3.8	1.2	0.3	2.2	0	0	31.2	9	58.4	1.1	0.3	3.02	89	27.4	90.8	29.6	325	69	21.2	186	0.14	7.8	15.4	10.7	0.9	121.7	25.2	1.25	17.4
163	2	42	3	1	0	2				1	0	3	190	190	0	1	19.9481	1	0	100	4.5	1.4	0.4	2.5	0.1	0	31.5	9.8	55.8	2.2	0.7	3.24	91	28.6	88.4	28.2	318	61.8	19.5	183	0.14	8.1	15.1	10.7	0.9	121.7	23	1.7	16.8
164	2	74	3	2	0	2				5	1	3	750	150	0	1	23.4952	2	0	100	3.5	0.5	1.9	1	0.1	0	13.9	54.3	29.7	1.6	0.5	3.23	113	34.8	107.7	35.1	325	54	13.7	96	0.11	11.5	16.5	11.1	0.93	113	25.9	2.52	16.2
165	2	74	3	2	0	2				4	1	3	600	150	0	1	23.4952	2	0	100	3.3	0.9	0.4	2	0.1	0	25.7	13	59.1	2.1	0.1	3.06	111	33.8	110.6	36.3	328	60.6	15	65	0.08	11.9	16.6	11.3	0.95	109	27.3	2.08	15.5
166	2	73	3	2	0	2				3	1	3	450	150	0	1	23.4952	2	0	100	4.7	1.2	0.4	3.1	0.1	0	24.7	8.6	65.4	1.2	0.1	3.36	121	36.2	107.8	35.9	334	57.1	14.6	98	0.1	10.7	16.5	10.9	0.91	117.2	26.8	2.29	15.8
167	2	73	3	2	0	2				2	1	3	300	150	0	1	23.4952	2	0	100	3.9	1.2	0.5	2.1	0.1	0	31.3	13.4	53.3	1.9	0.1	3.21	114	34.7	108	35.4	329	59.6	15	96	0.13	11.7	16.4	10.9	0.91	117.2	27.3	2.61	14.6
168	1	69	4	0	1	3				5	1	4	1000	200	1	1	25.1429	1	1	100	6.1	2	0.4	3.3	0.4	0.1	33.4	6.5	53.5	5.7	0.9	4.13	124	36.7	88.9	30.1	338	52	16.3	190	0.17	9	15.6	11.1	0.93	113	23.7	3.76	16.6
169	2	60	3	0	5	3	0	0	0	8	1	4	1040	130	0	1	23.7332	1	0	100	4.4	1.4	0.5	2.4	0.1	0	30.8	12	55.1	1.7	0.4	4.13	109	34.7	84.1	26.5	314	61.9	20.5	182	0.18	10	16.4
170	2	60	3	0	5	3	0	0	0	7	1	4	910	130	0	1	23.7332	1	0	100	5.2	1.3	0.5	3.3	0.1	0	24	9.9	64.3	1.4	0.4	4.01	102	32.8	81.8	25.5	311	56.8	19.3	253	0.25	9.9	16.2	10.9	0.91	117.2	24.5	7.02	15.5
171	2	60	3	0	5	3	0	0	0	6	1	4	780	130	0	1	23.7332	1	0	100	3.6	1	0.5	2.1	0.1	0	26.7	12.9	57.4	2.3	0.7	4.04	105	33.4	82.6	26	314	54.5	18.4	160	0.18	11	16.8	10.1	0.84	136.8	22.8	3.13	16.1
172	2	60	3	0	5	3	0	0	0	5	1	4	650	130	0	1	23.7332	1	0	100	5.6	1.4	0.5	3.6	0.1	0	24.6	9.7	63.9	1.6	0.2	3.99	101	32.3	80.9	25.4	313	48.7	16.6	215	0.23	10.6	16.2	10.7	0.9	121.7	26	6.51	14.8
173	2	60	3	0	5	3	0	0	0	4	1	4	520	130	0	1	23.7332	1	0	100	5	1.4	0.5	3	0.1	0	27.7	10.8	59.4	1.6	0.5	4.27	110	34.9	81.8	25.8	315	46.6	15.9	217	0.21	10.3	16.5	10.2	0.85	134.1	24.4	2.4	16.6
174	2	60	3	0	5	3	0	0	0	3	1	4	390	130	0	1	23.7332	1	0	100	5.8	1.5	0.6	3.5	0.1	0	26	11.1	60.1	2.4	0.4	4.07	108	33.5	82.3	26.5	322	44.6	15	191	0.21	11.8	16.6	10.6	0.88	126.5	25.4	4.63	14.5
175	1	70	4	1	0					3	1	4	450	150	1	1	19.3792	3	1	85	4.3	0.6	0.3	3	0.3	0	14.5	6.9	71.7	6.5	0.4	3.2	111	33.7	105.4	34.6	329	51.5	13.3	135	0.13	9.8	16.3	10.7	0.9	121.7	27.3	3.62	16.3
176	1	52	3	2	0	1				2	1	4	400	200	1	1	28.7105	1	0	100	7.8	2.6	0.7	4.3	0.2	0	32.9	8.3	55.6	2.7	0.5	4.97	152	45.7	91.9	30.5	333	46.4	13.9	200	0.2	9.8	16.4	9.9	0.82	145.4	24.7	2.7	16.2
177	1	79	3	2	1	1	1	1	0	4	1	4	720	180	1	1	24.6755	2	0	100	5.5	0.6	0.7	3.9	0.3	0	10.5	12.3	71.2	5.3	0.7	3.06	115	33.1	108.3	37.4	347	71.8	18.1	171	0.14	8.3	16	10.9	0.91	117.2	28	4.07	15.8
178	2	58				4				1	0	4	200	200	0	1	18.3594	1	0	100	5.5	1.7	0.6	3.1	0.1	0	31.9	10.1	56.5	0.9	0.6	3.86	120	36.7	95.1	31.1	327	46.1	13.4	91	0.09	9.5	16.4	11.1	0.93	115.1	25.6	3.62	15.4
179	2	59	4	1	0					12	1	4	1200	100	0	1	22.2222	1	1	100	6	1.9	0.3	3.5	0.2	0.1	31.9	4.9	58.6	3.7	0.9	4.05	127	38.8	95.7	31.4	327	50.8	14.7	182	0.19	10.6	16.3	9.9	0.82	142.5	24.5	2.84	17.1
180	1	65	4	2	5	3				4	1	4	600	150	1	1	23.1481	1	0	100	3.6	1.7	0.6	1.1	0.1	0	46.3	17.3	32.2	3.3	0.9	4.03	106	33.9	84	26.4	313	71.8	23.4	89	0.08	8.4	15.2	12	1.01	98.1	28.6	2.65	16.6
181	1	60	3	0	0	3				7	1	2	1400	200	0	1	21.9713	1	0	100	3.8	1.5	0.3	1.9	0.1	0	39.6	7.1	49.1	3.8	0.4	4.06	95	31.1	76.7	23.4	305	61.5	22	140	0.15	10.5	16	10.6	0.88	126.5	25.6	2.61	16.1
182	1	60	3	0	0	3				6	1	2	1200	200	0	1	22.7204	1	0	100	7	1.1	0.6	5.3	0.1	0	15	8.2	75.7	1	0.1	4.5	108	35.6	79	23.9	303	67.7	24	191	0.18	9.3	15.9	10.8	0.91	119.5	24.8	3.01	14.5
183	1	60	3	0	0	3				5	1	2	1000	200	0	1	22.7204	1	0	95	4.9	1.4	0.3	3.1	0.1	0	27.9	6.7	63.4	1.9	0.1	4.33	104	34.6	79.8	24	301	66.8	23.2	207	0.21	9.8	15.8
184	2	63	3	0	0	3				1	1	2	180	180	0	1	22.4766	1	0	100	3.3	1.1	0.4	1.7	0.1	0	34.3	13.2	50.8	1.6	0.1	4.03	111	33.8	83.8	27.7	328	65.3	21.1	210	0.17	8.2	15.1	11.8	0.99	101.6	27	3.07	16
185	1	71								4	0	2	760	190	1	1	20.7031	3	0	100	2.7	1.6	0.2	0.9	0.1	0	57.9	7	33.2	1.9	0	3.67	122	37.4	101.9	33.4	326	50.3	13.4	60	0.08	13.2	16.7	10.8	0.9	121.7	26.8	2.16	17.2
186	2	68	3	2	0	1				4	1	3	480	120	0	1	22.2656	1	0	100	4.4	1.2	0.5	2.6	0	0	27.3	12.2	59.4	0.9	0.2	4.97	145	43.8	88.2	29.1	331	89.5	28.2	129	0.12	9.3	15.8	9.2	0.76	165.3	21.7	3.47	17.4
187	1	72	3	1	1	2				3	0	4	360	120	1	1	19.8177	2	1	100	4.8	1.1	0.5	3.1	0.1	0	22.7	10.5	63.8	2.5	0.5	4.15	134	41.2	99.2	32.4	325	49.5	13.7	104	0.1	9.6	16.3	12.3	1.04	93.3	28.2	2.9	17.6
188	2	68	2	1	0	3	0	0	0	4	1	3	660	165	1	1	24.8889	1	1	100	2.9	1.9	0.2	0.7	0	0	64.9	8.1	25.4	1.5	0.1	2.67	97	29.3	109.8	36.5	331	80.7	19.8	70	0.07	10.3	16.4	10.8	0.91	119.5	23.5	1.97	18.1
189	1	54	4	2	1					3	1	4	660	220	0	1	20.2449	1	1	100	4.2	1.5	0.4	1.9	0.4	0	36.3	8.8	45.4	9	0.5	3.23	114	34	105.4	35.4	335	77.3	20.1	130	0.14	10.5	16.8	10.8	0.91	119.5	27.3	1.95	16.4
190	1	54	4	2	1					2	1	4	440	220	0	1	20.2449	1	1	100	3.7	1.4	0.3	1.6	0.4	0	37.8	8.9	42.6	9.8	0.9	3.23	108	32.9	101.8	33.6	328	709	19.3	128	0.14	10.6	16.3	11.1	0.93	113	27.1	1.82	16.1
191	1	54	4	2	1					1	1	4	220	220	0	1	20.2449	1	1	100	5.4	1.7	0.4	2.9	0.4	0	31.1	7.5	53.8	7.4	0.2	4.07	130	39.4	96.9	31.9	330	46.5	13.2	247	0.24	9.7	16.3	11.2	0.94	111	28.6	2.48	16
192	2	67					0	0	0	2	0	4	360	180	0	1	24.0346	1	1	100	2.6	1	0.5	0.8	0.2	0	39.5	21.3	30.6	7.4	1.2	3.29	93	29.4	89.3	28.3	316	98.3	32.1	46	0.04	9.4	15.8	11	0.92	115.1	23.9	1.87	17.8
193	2	67					0	0	0	1	0	4	180	180	0	1	24.0346	1	0	100	3.2	1.1	0.5	1.2	0.4	0	33.1	14.3	38.4	14	0.2	3.55	95	30.7	86.6	26.8	309	75	25.5	109	0.11	10.2	16.5	11.4	0.96	107.1	23.8	1.95	17.4
194	1	49	4	1	0	2				1	0	3	230	230	0	1	25.9516	1	1	100	4	0.9	0.3	2.7	0	0	23	8.1	68.2	0.4	0.3	3.83	122	37.1	96.8	31.9	329	49.2	14.1	125	0.11	9.1	16.1
195	2	72	5	5	1	2				3	1	4	585	195	0	1	26.4792	2	1	90	6.5	1.6	0.4	4.4	0.2	0	24.2	5.4	67.6	2.4	0.4	3.69	120	35.9	97.2	32.7	334	63.6	18.1	212	0.2	9.3	16.4	10	0.83	139.6	25.6	3.79	15.1
196	2	72	5	5	1	2				2	1	4	390	195	0	1	26.4792	2	1	90	6.8	1.8	0.5	4.4	0.1	0	26.6	6.7	64.6	1.6	0.5	3.77	117	34.6	91.7	31	338	52	16.2	193	0.17	8.8	16	10.5	0.88	126.5	24.9	3.19	14.6
197	1	67	5	5	1					1	0	4	200	200	1	1	26.3656	1	0	100	5.7	2.2	0.6	2.7	0.2	0	38.6	10.5	47.1	3.5	0.3	4.69	163	48.7	103.9	34.8	335	51.6	13.7	128	0.12	9.7	16.3	10.5	0.88	126.5	26.5	3.32	16
198	1	69	4	2	1	3	0	0	0	5	0	4	1000	200	1	1	18.6082	1	1	100	4.1	1.2	0.3	2.5	0.1	0	7.9	60.6	29.9	1.2	0.4	3.62	120	36.4	100.5	33.2	330	53.4	14.5	147	0.17	11.2	16.2	11.1	0.93	113	26.2	2.61	16.9
199	2	49	3	1	0	3				1	0	3	200	200	0	1	21.2654	1	1	100	3.8	1.5	0.5	1.7	0.1	0	38.9	13.4	44.1	3.1	0.5	4.22	120	36.7	86.9	28.5	327	40.6	13.1	135	0.12	9.1	16.1	10.7	0.89	124.1	24	2.4	15.9
200	2	64	3	1	0	3				4	0	3	720	180	1	1	22.7732	1	0	100	4.5	1.7	0.5	2	0.2	0	38.6	12	45.4	3.4	0.6	3.7	132	39	105.4	35.6	338	65.4	17	133	0.15	11.1	16.2	10.5	0.88	126.5	24.1	3.13	17.3
201	1	73	3	0	0	3				1	1	4	200	200	1	1	24.2123	2	1	90	4.5	1.2	0.5	2.8	0.1	0	26	10.6	62.1	1.1	0.2	4.08	94	30.2	74.1	23	311	48.6	18.6	192	0.19	9.9	16	11	0.92	115.1	23.6	2.56	16.8
202	1	68	2	1	0	4				3	0	3	600	200	0	1	20.2449	2	1	90	2.7	0.5	0.3	1.6	0.2	0	20.2	11.2	59.9	8.1	0.6	3.48	103	32.1	902.3	29.7	321	60.4	17.9	121	0.12	9.4	15.8	11.8	0.99	101.6	25.7	1.94	16.5
203	2	61	3	2	5	3	1	0	0	5	0	4	900	180	0	1	23.7118	1	1	100	3.3	1.6	0.3	1.4	0.1	0	47	8.9	40.8	2.9	0.4	3.74	131	38.5	102.9	35.1	340	55.1	14.7	151	0.15	9.9	16.2	10.3	0.85	134.1	25.6	2.13	18
204	2	73	3	0	0	3	0	0	0	5	0	2	600	120	1	1	21.1927	2	0	100	4.2	1.6	0.4	2.2	0	0	38.6	9.4	51.5	0	0.5	3.08	108	32.2	104.6	34.9	335	52.5	13.7	200	0.21	10.4	16	10.5	0.88	126.5	24.1	2.4	16.6
205	2	56	2	1	0	3	0	0	0	6	0	3	1080	180	1	1	28.6667	1	1	100	4.5	2	0.4	2.1	0	0	43.6	8.4	47.4	0.4	0.2	3.35	124	36.6	109.4	36.9	339	56.5	13.4	112	0.13	11.3	16.5	10.7	0.9	121.7	25.4	2.44	17.2
206	2	56	2	1	0	3	0	0	0	5	0	3	900	180	1	1	27.0552	1	1	100	4.4	2.1	0.5	1.8	0.1	0	47.2	10.2	41.1	1.2	0.3	3.28	122	36.3	110.6	37.1	336	78.2	19.5	104	0.12	11.3	16.6	13.1	1	100	35.9	3.57	17.2
207	2	56	2	1	0	3	0	0	0	4	0	3	720	180	1	1	25.8876	1	1	100	4.1	1.9	0.4	1.7	0	0	46	10.9	42.1	0.7	0.3	3.28	112	33.8	103.1	34.2	331	74.5	19.9	126	0.12	9.3	16	11.1	0.93	113	24.5	2.37	16.1
208	2	56	2	1	0	3	0	0	0	3	0	3	540	180	1	1	25.5983	1	1	100	5.5	2.2	0.4	2.7	0.1	0	40.8	8.1	49.3	1.4	0.4	3.48	123	35	100.6	35.2	351	73.9	20.2	147	0.16	10.9	16.5	11	0.92	115.1	24.8	2.52	15.6
209	1	70	3	0	0	2	1	0	0	6	0	2	900	150	0	1	20.9366	2	0	100	4.9	1.7	0.5	2.4	0.3	0	35.1	9.2	50.3	5.3	0.1	4.29	126	40.2	93.8	29.4	313	67.9	19	144	0.17	11.7	16.3	11.3	0.95	109	26.2	2.25	17.7
210	1	72	5	5	1					1	0	4	150	150	1	1	23.0518	2	0	90	3.7	0.8	0.4	2.3	0.3	0	20.9	9.4	61.4	7.2	1.1	3.95	108	33.2	84.1	27.3	325	41.5	14	166	0.15	9.3	15.9	11.5	0.97	105.2	24.6	2.52	15.9
211	2	62	3	0	0	4				1	0	2	150	150	1	1	15.8222	4	0	90	2.6	1.6	0.3	0.6	0.1	0	60.7	10	24.6	3.8	0.9	3.76	116	35.1	93.3	30.7	330	53	15.8	110	0.13	11.4	16.3	10.7	0.9	121.7	26.8	1.94	21.1
212	2	60	3	0	0	3				4	0	2	760	190	1	1	22.4766	1	0	100	3.1	0.6	0.3	2.1	0.1	0	20.1	8.9	68.1	2.6	0.3	3.48	110	34	97.7	31.6	324	69.1	19.3	109	0.13	11.7	16.9	13	1.11	82	26.5	1.83	16.9
213	1	70	3	0	0	2	0	1	1	2	1	2	300	150	1	1	22.8571	2	0	100	6	2.1	0.5	3.4	0.1	0	34.3	8.4	56.3	0.8	0.2	4.29	135	41.6	96.9	31.5	325	49.6	14	169	0.16	9.7	15.9	11.2	0.94	111	26.2	2.7	16.4
214	2	56	4	2	0	2	0	0	0	1	1	4	130	130	0	1	27.0552	2	1	100	2.4	0.9	0.3	1.1	0.1	0	38.4	12.9	46.3	1.9	0.5	4.16	127	38.4	92.2	30.6	331	42.2	12.6	193	0.21	10.7	16.4	10.4	0.87	128.9	22	3.7	15.9
215	1	58	4	0	1	3	0	0	0	1	0	4	200	200	1	1	21.4533	1	1	100	4.2	1.3	0.4	2.3	0.3	0	29.7	9.5	54	6.2	0.6	4.99	111	35.3	70.7	22.2	314	54.4	22.9	227	0.22	9.8	15.3	11.1	0.93	113	23.6	1.85	17.4
216	1	56	4	1	1	3	1	0	0	6	0	4	900	150	0	1	26.2346	1	0	100	8	1.7	0.4	5.8	0.1	0	20.7	5.4	72.4	1.4	0.1	4.21	124	38.1	90.5	29.4	325	52.6	15.9	190	0.18	9.6	15.9	11.4	0.96	107.1	28	5.53	15.9
217	1	56	4	1	1	3	1	0	0	5	0	4	750	150	0	1	26.2346	1	0	100	4	1.4	0.4	2.1	0.2	0	33.9	8.6	52.6	4.6	0.3	4.44	130	39.8	89.7	29.3	327	53.8	16.4	196	0.19	9.6	15.8	11.1	0.93	113	24.8	3.47	16.2
218	1	56	4	1	1	3	1	0	0	4	0	4	600	150	0	1	26.2346	1	0	100	6.3	1.3	0.4	4.3	0.1	0	21.4	7.1	68.6	2.3	0.6	4.83	144	42.9	88.9	29.8	336	53.4	16.7	265	0.21	9.4	16	10.7	0.9	121.7	26.6	3.85	15.6
219	1	56	4	1	1	3	1	0	0	3	0	4	450	150	0	1	26.2346	1	0	100	8.7	1.6	0.5	6.5	0.2	0	18.1	5.4	73.9	2.2	0.4	4.8	139	42.7	89	29	326	49.4	15.4	216	0.19	9.8	16	10.4	0.87	128.9	23.1	2.97	15.1
220	1	61	2	5	1	3	0	0	0	3	1	4	390	130	0	1	19.6235	1	0	100	3.3	1.1	0.5	1.5	0.1	0	34.3	16.5	44.7	4	0.5	4.08	130	38.8	95.2	31.9	335	47.2	13.5	173	0.15	8.8	15.9	10.2	0.85	134.1	26.9	3.39	16.6
221	1	76	3	2	5	3	0	0	0	4	1	4	800	200	0	1	25.8166	2	0	90	6.2	2.2	0.4	3.1	0.4	0.1	35.7	7	50.8	5.7	0.8	4.63	149	43	92.9	32.1	347	44.7	13.3	181	0.17	9.4	16	10.8	0.91	119.5	27.1	3.7	15.8
222	1	76	3	2	5	3	0	0	0	3	1	4	600	200	0	1	25.0995	2	0	90	8.3	2.1	0.6	5.2	0.4	0	25.7	7.1	62.2	4.5	0.5	5.07	157	46.9	92.6	30.9	335	46.3	13.8	288	0.22	8.7	15.9	10.7	0.9	121.7	25.8	3.29	15.4
223	1	75	3	2	5	3	0	0	0	2	1	4	400	200	0	1	25.8166	2	0	90	9	2.2	0.6	5.7	0.4	0.1	24.6	7	63.6	4.1	0.7	4.51	143	41.1	91.2	31.7	348	46.7	14.1	228	0.2	9.2	16	10.8	0.91	119.5	25.5	3.07	15.1
224	2	70	3	0	0	3	1	0	0	2	0	2	300	150	1	1	22.719	2	0	100	3.3	1.2	0.3	1.7	0.1	0.1	36.5	8.9	51	1.9	1.7	3.91	124	37.2	95.1	31.7	333	60	17.4	140	0.15	11	16.3	11.1	0.93	113	26	2.65	16.6
225	2	70	3	0	0	3	1	0	0	1	0	2	150	150	1	1	22.719	2	0	100	3.3	1	0.3	2	0.1	0	30.5	7.5	59.5	1.7	0.8	3.88	117	36.2	93.2	30.3	323	56.5	16.7	141	0.15	10.3	15.8	11.1	0.93	113	27.2	2.25	16.9
226	2	68	3	1	0	3				6	1	3	1080	180	0	1	19.9481	1	0	100	3.2	1.5	0.4	1.3	0.1	0	44.6	11.8	41.7	1.4	0.5	3.35	95	29.7	88.8	28.3	320	90.7	28.5	189	0.15	8.2	16
227	1	67	3	2	1	2	1	0	0	6	0	4	1200	200	0	1	20.3816	1	0	100	4.3	2.4	0.3	1.5	0.1	0	55.4	7.4	34.3	2.6	0.3	3.58	134	40.2	112.3	37.4	333	59.1	14.3	101	0.09	9.1	16
228	1	37	3	0	0	2	1	0	0	1	0	2	200	200	0	1	22.7244	1	1	100	5.8	2.1	0.5	3.1	0.1	0	35.8	8.2	8.2	1.8	0.4	4.38	130	39.6	90.4	29.8	328	51.5	15.8	259	0.22	8.6	15.5	10.3	0.86	131.5	23.4	1.9	17.2
229	2	72				3	0	0	0	8	0	4	960	120	0	1	22.0317	2	1	100	2.8	1.2	0.2	1.4	0.1	0	41.1	8.2	48.5	1.7	0.5	3.77	126	38	100.8	33.6	332	49.4	13.3	86	0.09	10.4	16.5	11.3	0.94	111	26.2	3.19	16.8
230	1	53	3	0	0	2				2	0	2	400	200	0	1	22.3094	1	1	100	4.2	1.5	0.4	2.2	0.2	0	35.7	9.1	51.3	3.5	0.4	4.93	143	43.2	87.6	29.1	331	49.2	15.8	87	0.13	14.4	16	10.7	0.89	124.1	23.6	1.82	17.5
231	2	50	3	0	0	2	1	0	0	7	0	2	1400	200	0	1	19.721	1	0	90	4.1	0.7	0.3	3.1	0.1	0	17.2	7	74.4	1.3	0.1	4.26	132	39.5	92.8	31	334	53.3	16	246	0.2	9.6	16.5	10.9	0.91	119.4	25.2	4.17	14.2
232	2	50	2	1	0	3	0	0	0	6	0	2	1080	180	0	1	21.7738	1	0	100	5	2	0.3	2.6	0.1	0	40.3	5.8	51.7	1.5	0.7	4.21	129	38.7	91.9	30.6	333	42.3	12.7	337	0.29	9.7	15.9	10.2	0.85	134.1	26	2.56	16.2
233	2	52	4	0	0	3				3	0	2	540	180	0	1	19.9573	1	0	100	4.9	1.7	0.4	2.8	0	0	35.3	7.1	56.7	0.7	0.2	4.35	140	42.7	98.2	32.2	328	58.1	16.6	148	0.13	10.2	16	10.5	0.87	128.9	23.7	2.33	15.1
234	1	73	3	1	0	2				6	1	3	1200	200	0	1	23.03	2	1	100	12.4	1.2	0.9	10.3	0.1	0	9.7	7.2	82.5	0.5	0.1	4.28	102	33.3	77.8	23.9	306	48.9	17.3	148	0.13	8.6	15.4	10.9	1.01	97.8	27.6	2.2	16.5
235	2	72	4	1	0	2				4	1	3	600	150	0	1	28.4444	2	0	100	11.8	0.9	0.6	10.3	0	0	7.7	4.9	87.3	0	0.1	3.11	91	29.4	94.6	29.3	310	72.5	21.5	206	0.22	10.5	16	11.1	0.93	113	24.2	2.48	16.2
236	1	63	3	2	0		1	0	0	4	0	4	720	180	0	1	17.3061	1	1	100	5.3	1.1	0.7	3.4	0.1	0	21.3	13.6	63.3	1.4	0.4	4.08	138	40.6	99.6	33.9	340	60.1	16.9	86	0.09	10.3	16	11.5	0.96	107.1	24.5	2.23	17.4
237	1	46	3	2	0	3	0	0	1	7	1	3	1400	200	0	1	23.8751	1	1	90	4	1.6	0.4	1.7	0.3	0.1	39.7	10.4	42.1	6.6	1.2	3.67	129	38.9	106.1	35.3	332	70.8	17.7	179	0.15	8.6	16.2	11.1	0.93	113	24.2	2.32	18.2
238	1	73	3	0	0	3	1	0	0	3	0	2	600	200	0	1	23.9869	2	0	100	3.3	1.1	0.4	1.6	0.1	0	34	12.5	49.3	3.7	0.5	3.97	107	33.6	84.6	27.1	318	79.4	24.5	116	0.11	9.6	16	11	0.92	115.1	24.6	2.1	17.2
239	1	51	5	5	1					2	0	4	360	180	0	1	26.7299	1	1	90	4.2	1.5	0.4	2.2	0.1	0	35.3	10.4	51.4	2.7	0.2	4.32	140	41.8	96.8	32.3	335	56.6	16	128	0.13	9.8	16.2	11.6	0.98	103.3	25.2	2.13	17.4
240	1	60	1	2	1	1	0	0	0	4	1	4	800	200	0	1	20.5693	1	0	100	4.3	1.2	0.3	2.6	0.1	0	28.7	8	61.2	1.9	0.2	3.29	103	31.8	96.8	31.2	324	55.6	15.8	151	0.13	8.5	15.9	11	0.92	115.1	24.5	3.62	15.3
241	1	60	1	2	1	1	0	0	0	3	1	4	600	200	0	1	20.5693	1	0	100	6.8	1.5	0.3	5	0	0	21.9	4.7	727	0.4	0.3	3.59	114	35.3	98.2	31.7	323	50.6	14.1	244	0.21	8.7	16.1	11.8	0.99	101.6	26.5	7.24	14.7
242	1	72	2	1	0	4	1	0	0	4	1	3	800	200	0	1	19.5502	2	0	100	4.5	2.1	0.5	1.6	0.2	0.1	45.8	11.4	36.5	5	1.3	3.38	114	34.2	101.1	33.7	333	67.2	18.3	82	0.08	10	16	11.6	0.98	103.3	26.1	1.27	17.9
243	1	72	2	1	0	4	1	0	0	3	1	3	600	200	0	1	19.5502	2	0	100	5.8	1.8	0.7	3.1	0.2	0.1	30.6	12.1	53.5	2.7	1.1	3.24	103	31.4	96.8	31.9	328	67.7	19.3	94	9	9.4	16	12.9	1.1	83.3	27.3	1.78	16.8
244	1	72	2	1	0	4	1	0	0	2	1	3	400	200	0	1	19.5502	2	0	100	4.4	1.6	0.4	2	0.3	0.1	36.7	8.9	46.1	6.9	1.4	3.44	105	32.2	93.6	30.4	326	60.2	17.7	126	0.12	9.7	15.8	12	1.01	98.1	27.3	1.68	15.6
245	2	62	3	1	0	2				4	0	3	720	180	0	1	24.5675	1	0	100	4.6	1.9	0.5	2.1	0.1	0	41.3	10.7	45.8	1.7	0.5	4.2	117	37.5	89.4	27.9	312	62.3	19.3	178	0.19	10.5	16	10.6	0.89	124.1	25.6	2.73	17.4
246	1	88								5	0	4	500	100	0	1	17.5697	2	1	90	4.5	1.3	0.6	2.5	0.1	0	28.2	13.2	56.1	2	0.5	2.87	90	27.9	97.1	31.4	323	53.3	15.1	206	0.17	8.4	15.9	11.8	1	99.8	28.1	4.75	15.8
247	1	58					1	0	0	3	0	4	450	150	0	1	26.0262	1	1	100	3.2	1	0.4	1.7	0.1	0	32	12.2	51.4	4.2	0.2	4.02	142	43.1	107.3	35.4	329	52.2	13.4	131	0.15	11.2	16.1
248	1	70	4	1	0	3				6	0	3	1200	200	0	1	23.8754	2	1	100	5.2	0.7	0.4	3.7	0.5	0	13.2	6.8	70.6	9.3	0.1	4.27	127	39.2	91.9	29.7	324	49.2	14.6	179	0.14	8	15.6	11.1	0.93	115.1	30.6	5.81	14.6
249	2	44	3	2	5	1	1	0	0	6	0	4	1080	180	0	1	25.3906	1	0	100	4.6	1.6	0.2	2.6	0.1	0	35.5	5.1	57.5	1.5	0.4	4.32	136	41	94.8	31.5	332	52.5	15.2	216	0.25	11.3	16.2	10.4	0.86	131.5	27.6	1.99	16.1
250	2	65	3	2	0	2				4	1	3	640	160	0	1	22.8889	1	0	100	5.3	2.6	0.6	2	0.1	0	48.7	11.4	37	2.4	0.5	3.75	119	36.2	96.4	31.9	329	65.1	18.6	247	0.22	8.8	15.5	10.6	0.89	124.1	24.2	2.16	17.3
251	2	67	3	2	5	3	1	0	0	3	0	4	480	160	0	1	19.7239	1	0	100	4	2.2	0.4	1.3	0.1	0.1	54.5	9.6	32.6	2	1.3	4.11	129	38.6	94	31.4	334	64.2	18.8	178	0.19	10.4	16.2	10	0.83	142.4	27.4	2.74	16.3
252	1	73	4	2	0		0	1	0	3	0	3	570	190	0	1	24.977	2	1	100	5.3	1	0.6	3.6	0.1	0	18.7	11.8	67.1	2.3	0.1	3.47	119	36.1	103.9	34.3	330	77.3	20.4	127	0.13	10	16.3	11.2	0.94	111	24.8	3.91	15.6
253	1	65	4	2	5	3				3	1	4	450	150	1	1	23.1481	1	0	100	4.8	1.8	0.8	2	0.1	0.1	38.4	16.8	42.1	1.7	1	4.12	111	35	85	27	317	63.8	20.6	70	0.06	8.6	15.2	11.9	1.01	98.1	28.5	2.83	16.2
254	2	69	4	1	0					8	0	3	1200	150	1	1	17.5781	1	1	100	3.8	1.1	0.4	2.3	0.1	0	28.1	9.7	60.4	1.2	0.6	3.72	116	36.2	97.4	31.3	320	54.7	15.3	128	0.13	9.8	16	11.1	0.93	115.1	27.6	2.92	18
255	1	57	3	1	1	3	1	0	0	2	0	4	300	150	0	1	22.8374	1	0	100	5.4	1.7	0.6	2.9	0.2	0	31.5	11.3	53.8	2.8	0.6	4.18	135	40.7	97.4	32.4	332	63.6	17.9	112	0.12	10.9	16.3	10.8	0.9	121.7	23.6	2.56	16.1
256	1	67	3	1	1	3	0	1	0	1	0	4	200	200	0	1	23.8751	1	0	100	2.6	1.3	0.4	0.8	0.1	0	49.4	14.7	31.1	4.1	0.7	4.21	92	29.9	71.1	21.8	308	48.9	19	216	0.2	9.2	15.2	12.3	1.04	91.8	25.8	1.99	16.7
257	1	54	3	1	0	3	0	0	0	4	0	3	800	200	0	1	22.5827	1	0	100	6	1.9	0.3	3.6	0.2	0	31.9	5.1	59.2	3.4	0.4	4.19	139	41.4	98.9	33.3	336	51.9	14.4	272	0.24	9	15.8	10.4	0.86	131.5	23.9	2.55	15.9
258	2	70	2	1	0	2				3	1	2	540	180	1	1	27.3438	2	1	100	3	0.5	0.3	1.8	0.4	0	18.4	9.4	60	11.8	0.4	3.7	112	34.6	93.4	30.2	324	53.1	15.6	146	0.12	8.3	16	10.7	0.9	121.7	27.7	2.54	16.5
259	2	70	2	1	0	2				2	1	2	360	180	1	1	27.3438	2	1	100	3.4	0.4	0.4	2.2	0.4	0	12.7	11.8	63.8	11.3	0.4	3.81	113	34.5	90.5	29.7	328	60	18.1	194	0.15	7.8	15.6	10.5	0.87	128.9	27.5	2.52	16.8
260	1	61	3	1	0	4	1	0	0	2	0	3	380	190	0	1	26.2976	1	0	100	4.9	0.9	0.5	3.3	0.2	0	18.2	11	66.2	4.5	0.1	4.06	133	39.7	97.9	32.7	335	57.4	15.9	222	0.2	9.2	15.8	10	0.83	139.6	25.3	2.42	17.2
261	1	61	3	0	0	3				5	0	2	1000	200	1	1	20.9343	1	0	100	3.4	0.9	0.4	2.1	0	0	27.6	10.4	60.9	1.1	0	4.2	119	37.2	88.5	28.3	320	58.6	18.3	168	0.17	9.9	16.2	10.9	0.91	117.2	26.4	1.75	16.8
262	1	64	5	1	0	3				1	0	4	200	200	1	1	18.7109	2	1	100	4.2	1.4	0.3	2.4	0.1	0	32.5	7.6	56.8	2.8	0.3	4.01	122	37.8	94.2	30.6	323	52.7	15.3	96	0.11	11.5	16	10.9	0.91	117.2	25.5	3.22	16.5
263	2	72	3	2	0	3	1	0	0	1	1	3	180	180	1	1	27.8852	2	0	100	4.9	1.1	0.3	3.5	0.1	0	139	42.1	4.52	93.1	30.8	4.52	139	42.1	93.1	30.8	330	54.2	16.1	155	0.14	9	15.9	11.4	0.95	109	27.5	3.05	17.1
264	2	62	3	1	0	3	0	0	0	1	0	3	170	170	1	1	21.2084	1	1	100	4.3	1.4	0.3	2.5	0.1	0	31.5	7.6	59.1	1.4	0.4	3.88	121	37.2	96	31.1	325	53.6	15.3	154	0.15	9.7	15.7	10.9	0.91	117.2	26.3	3.09	16.6
265	1	54	4	2	1					4	1	4	880	220	0	1	19.5918	1	0	100	5.3	1.1	0.2	3.4	0.5	0	21.1	4.3	64	10.1	0.5	3.5	123	37.2	106.2	35.2	331	56.9	14.6	131	0.15	11.3	16.7	10.6	0.88	126.5	28.8	2.55	16
266	1	39	3	2	0		0	0	0	4	0	4	600	150	0	1	18.5135	1	0	100	11.2	1.3	0.8	9	0.1	0.1	6.9	79.8	11.5	1.2	0.6	3.57	113	34.4	96.4	31.7	328	62.8	17.9	239	0.26	10.7	16.3	10.9	0.91	117.2	25.9	4.57	15.8
267	1	48	4	2	4	1	0	0	0	9	1	3	1530	170	0	1	27.4587	1	0	100	5.4	1.7	0.5	3.1	0.1	0	31.9	8.8	57.6	1.1	0.6	4.69	138	42	89.6	29.5	329	48.4	14.8	101	0.11	10.4	16.1	10.6	0.89	124.1	24.5	3.56	17.7
268	1	49	3	2	0	3				5	0	3	750	150	0	1	27.0416	1	1	100	5.4	2.6	0.4	2.2	0.1	0	49.4	7.6	40.1	2.7	0.2	4.17	143	42.1	100.9	34.4	340	55.8	15.1	186	0.17	9.1	16
269	2	64	4	1	5	2	0	0	0	4	0	4	400	100	0	1	19.5556	1	1	100	3.4	0.9	0.4	1.9	0.2	0	26.8	11.1	55.8	5.2	1.1	3.79	117	36	95.1	31	325	52.6	15.4	190	0.28	14.8	16.1
270	2	71	3	2	0	1	1	0	0	2	0	3	400	200	1	1	26.4463	2	1	100	4.1	1.1	0.4	2.4	0.2	0	27.2	9.7	58.2	3.9	1	3.8	121	37.2	97.8	31.8	325	49.1	13.8	128	0.15	12	16.6	10.5	0.88	126.5	27.2	3.19	16.7
271	2	60	4	0	0	3				1	1	2	180	180	0	1	22.0386	1	0	100	3	1.4	0.4	1.2	0	0	46	13.1	40	0.7	0.2	3.57	107	32.5	90.9	30.1	329	56.5	17.3	111	0.09	7.9	15.6	10.4	0.86	131.5	23.5	2.3	16.6
272	1	67	3	1	0	3				7	0	3	1400	200	0	1	21.2245	1	1	100	4.3	0.9	0.3	3	0.2	0	19.9	7.8	68.2	3.8	0.3	3.55	128	38.1	107.2	336	36.1	68.8	17.9	61	0.06	10.3	17.4	11.1	0.93	113	22.9	4.45	16.6
273	1	76	3	2	0	2				4	1	3	600	150	0	1	27.6817	2	1	100	6.7	1.1	0.5	4.9	0.2	0	15.9	7.4	73	3.6	0.1	4.59	137	41.3	90	29.8	332	45.5	13.7	192	0.21	11	16.3	11.5	0.96	107.1	26.4	4.19	15.3
274	1	73				3	1	0	0	2	0	4	380	190	0	1	23.4568	2	1	100	3.5	1.2	0.5	1.7	0.1	0	33.3	13.4	49.8	3	0.5	3.72	128	37.3	100.3	34.3	343	48.3	13.4	132	0.12	8.9	16.2	10.9	0.91	117.2	26.5	3.89	15.7
275	2	62	2	0		1				6	0	3	900	150	0	1	18.662	1	1	100	1.8	0.4	0.1	1.2	0.1	0	20	7.4	68.2	3.6	0.8	3.67	125	37.3	101.6	34.1	335	50.8	13.7	55	0.04	9.9	16.7	10.9	0.91	119.4	25.1	2.3	16.8
276	1	61	4	2	0	3				1	0	3	230	230	0	1	21.0667	1	0	100	4	1.2	0.4	2.3	0.1	0	30.8	9.5	56.2	2.8	0.7	3.95	121	37.5	95	30.7	323	47.6	13.8	153	0.16	10.1	16.3	10.4	0.86	131.5	25.1	203	16.3
277	1	70	3	2	1	3				6	1	4	720	120	0	1	22.7732	2	0	100	5.2	1.4	0.5	3.1	0.2	0	26.6	9.8	59.3	3.7	0.6	4.03	107	34.1	84.6	26.6	314	54.5	17.6	225	0.22	10	16.1	12.1	1.02	94.9	26.9	2.63	18.9
278	1	63	3	2	1	1	0	0	0	2	0	4	400	200	0	1	21.2585	1	0	100	5	0.3	2.5	1.9	0.2	0	6.4	50.4	38.9	3.6	0.7	3.85	118	35.6	92.5	30.6	331	54.3	16	196	0.21	10.7	15.8
279	1	58	3	0	1	3				3	1	4	627	209	0	1	17.9151	1	1	100	5.6	1.3	0.7	3.6	0.1	0	22.7	11.8	64.4	0.9	0.2	3.97	125	37.6	94.6	31.5	332	56.5	16.9	175	0.14	7.8	15.6	11.1	0.93	113	25.4	2.74	16.9
280	1	58	3	0	1	3				4	1	4	836	209	0	1	18.5911	1	1	100	5.2	1.3	0.6	3.3	0.1	0	24.7	11.6	62.6	1.1	0	3.95	130	38.2	96.8	32.9	340	63.5	18.1	139	0.12	8.6	15.8	11	0.92	115.1	25.9	3.76	15.8
281	1	58	3	0	1	3				5	1	4	1045	209	0	1	18.5911	1	1	100	3.3	0.9	0.6	1.9	0	0	25.5	16.9	56.4	0.9	0.3	3.82	126	37.9	99.1	33	332	58	16.1	100	0.1	9.7	16.7	10.8	0.9	121.7	28.3	3.5	17.2
282	1	60	4	1	0	3	0	0	0	1	0	4	200	200	0	1	24.9135	1	1	100	7.2	2.2	0.5	4.1	0.3	0	30.6	7.1	57.4	4.5	0.4	4.93	141	43.8	88.8	28.5	322	46.6	14.5	225	0.26	11.7	16.8	11.5	0.97	105.2	27.9	4.58	17.3
283	1	64	5	5	1	4	1	0	0	1	1	4	130	130	0	1	23.5078	1	0	100	4.1	1	0.4	2.6	0.1	0	25.2	10.2	62.7	1.6	0.3	3.81	97	30.6	80.3	25.6	31.7	45.3	15.6	233	0.21	8.9	15.6	11	0.92	115.1	23.3	4.11	15.4
284	1	61	2	1	0	2	0	0	0	4	0	3	800	200	1	1	23.4236	1	0	100	3.5	1	0.4	2.1	0	0	28	12.3	58.4	1.1	0.2	3.86	134	39.9	103.4	34.6	336	52.6	14	126	0.12	9.8	16.3	11.6	0.98	103.3	25.9	2.26	17.3
285	1	64	3	1	0	3	1	0	0	10	0	3	1500	150	0	1	20.1995	1	0	100	4	1.3	0.3	2.1	0.3	0	31.9	8.6	51.1	7.8	0.6	4.4	140	41.8	94.9	31.8	335	50	14.4	94	0.1	10.4	16.7	11.2	0.94	111	25.4	2.35	16.9
286	1	64	3	1	0	3	1	0	0	9	0	3	1350	150	0	1	21.7776	1	0	100	2.7	1.1	0.4	1	0.2	0	40.7	15	36.8	7	0.5	4.12	128	38.4	93.3	31.2	333	47.4	14	90	0.09	10.4	17.1	11.5	0.96	107.1	27.3	2.26	17.8
287	1	64	3	1	0	3	1	0	0	8	0	3	1200	150	0	1	20.9885	1	0	100	3.9	1	0.5	2	0.4	0	25.5	12.5	51.3	10.4	0.3	4.11	127	38.3	93.1	30.9	332	48.9	14.4	117	0.12	10.4	17	11.3	0.95	109	26.7	2.4	16.7
288	1	64	3	1	0	3	1	0	0	7	0	3	1050	150	0	1	21.7776	1	0	100	5.3	1.3	0.6	3.2	0.3	0	23.7	11	59.5	5.6	0.2	4.23	134	39.8	94	31.8	337	52.4	15.3	118	0.13	11.5	17.1	11.3	0.95	109	25.7	3.07	16
289	1	64	3	1	0	3	1	0	0	6	0	3	900	150	0	1	21.7776	1	0	100	5	1.3	0.4	2.9	0.3	0	25.1	8.8	59.3	6.6	0.2	4.26	130	39.5	92.8	30.5	329	50.4	14.9	120	0.13	10.4	16.7	11.6	0.98	103.3	25.6	2.13	15.2
290	1	64	3	1	0	3	1	0	0	5	0	3	750	150	0	1	21.7776	1	0	100	2.2	1	0.4	0.7	0.2	0	45.7	16	30.2	7.3	0.8	4.26	129	38.9	91.4	30.2	332	47.2	14.2	141	0.13	10	16.9	11.2	0.94	111	25.2	2.48	15
291	1	64	3	1	0	3	1	0	0	4	0	3	600	150	0	1	21.4619	1	0	100	2.4	1	0.3	0.9	0.2	0	11.5	37.8	41.2	9.2	0.3	4.28	131	38.9	91	30.6	337	45.6	13.7	150	0.16	10.8	17.1	12.4	1.05	90.3	25.6	2.37	15.8
292	2	68	3	2	0	1				3	1	3	360	120	0	1	26.079	1	0	100	4	1.2	0.5	2.3	0.1	0	29.4	13	56.2	1.2	0.2	4.31	134	40.6	94.1	31	330	90.2	26.5	133	0.13	9.5	16.3	9.5	0.78	158.2	20.8	3.44	17.1
293	2	72	5	5	1	2				4	1	4	780	195	0	1	24	2	1	90	5	0.4	2.6	1.5	0.4	0.1	7	52.2	30.5	8.9	1.4	3.83	107	32.7	85.3	27.8	327	52.1	17.2	259	0.21	8.8	15.7	10.2	0.84	136.8	24.8	2.7	15.1
294	1	34	5	5	1		1	0	0	3	0	4	585	195	0	1	16.205	4	1	100	4.7	1.9	0.4	2.1	0.2	0	40.3	8.9	45.7	4.9	0.2	4.85	135	42	86.7	27.9	321	104.8	32.9	205	0.17	8.1	15.2	10.8	0.9	121.7	25.4	2.65	15.9
295	2	58				4				2	0	4	400	200	0	1	18.3594	1	0	100	5.5	1.7	0.6	3.1	0.1	0	31.9	10.1	56.5	0.9	0.6	3.86	120	36.7	95.1	31.1	327	46.1	13.4	91	0.09	9.5	16.4	11.1	0.93	115.1	25.6	3.62	15.4
296	1	67	4	0	0	3				4	1	3	480	120	0	1	19.3792	1	0	100	4.7	0.4	2.5	1.6	0.3	0	8.5	52.2	33	5.8	0.5	3.96	103	30.8	77.9	26.1	334	52.4	18.5	161	0.06	9.5	15.9	10.9	0.91	117.2	26.3	3.36	13.9
297	2	76	5	5	1		1	0	0	3	0	4	300	100	0	1	25.3331	2	0	95	7.2	2	0.8	4.1	0.3	0	27.4	10.4	57.4	4.4	0.4	3.69	121	36.8	99.6	32.7	329	54.2	14.8	162	0.17	10.7	16.3	10.5	0.88	126.5	22.7	2.68	16.8
298	1	56	4	1	1	3	1	0	0	7	0	4	1050	150	0	1	26.2346	1	0	100	5.6	1.4	0.3	3.8	0.1	0	24.4	4.9	68.1	2.1	0.5	4.66	143	43.2	92.7	30.6	331	52.5	15.6	246	0.24	9.7	15.9	10.5	0.87	128.9	26.8	3.58	16.6
299	1	65	5	5	1		0	0	0	10	0	4	2080	208	0	1	22.0386	1	0	100	5.7	1.4	0.6	3	0.7	0	24.3	9.7	52.8	12.5	0.7	2.89	109	32.9	113.9	37.6	331	78.1	18.6	155	0.12	7.7	16.2	11.7	0.99	101.6	25.7	4.22	15.4
300	1	73	3	1		1				4	0	3	800	200	0	1	20.0474	2	1	100	3.9	1.5	0.3	2	0.1	0	38.1	8.6	50.5	2.2	0.6	3.38	106	32.8	96.9	31.3	323	74.8	21.2	177	0.15	8.6	15.4	11	0.92	117.2	26.9	2.27	15.7
301	1	70	5	5	1					2	0	4	320	160	1	1	22.5895	2	0	100	5	2	0.5	2.5	0.1	0	39.8	9.3	49.3	1.1	0.5	3.91	122	36	92.1	31.2	339	50.7	15.3	221	0.19	8.7	15.7	11	0.92	115.1	24.3	2.9	17.1
302	1	60	3	0	0	3				8	1	2	1600	200	0	1	22.6474	1	0	100	3.4	1.4	0.3	1.6	0.1	0	41.4	8.2	47.5	2.7	0.2	3.8	92	29.1	76.7	24.1	316	65	23.5	91	0.09	9.3	15.6	10.1	0.84	136.8	24.9	1.88	17.7
303	2	64	2	1	0	3				6	1	3	1200	200	0	1	27.6398	1	0	100	5.6	1.4	0.5	3.5	0.2	0.1	25.3	8.9	61.7	3.3	0.8	4.02	127	27.9	94.2	31.5	335	43.7	12.7	161	0.16	9.6	16.1	11.1	0.93	113	25.1	3.22	15.9
304	1	46				3	1	0	0	6	1	4	900	150	0	1	19.4674	1	0	90	7.3	0.8	0.4	5.9	0.1	0	11.6	5.9	80.9	1.3	0.3	3.71	128	38.7	104.2	34.6	331	55.9	14.8	88	0.08	9.3	16.3	11.4	0.96	107.1	27	4.58	15.3
305	1	70	5	5	1					3	0	4	480	160	1	1	22.4059	2	0	100	6	1.3	0.3	4	0.1	0	22.1	9.3	67.1	1.3	0.2	3.64	118	34.7	95.3	32.5	340	64.7	18.8	190	0.18	9.4	15.7	10.9	0.91	119.4	25.4	3.58	16.4
306	1	58				3				3	0	4	450	150	0	1	25.1543	1	1	100	5.8	1.6	0.4	3.5	0.3	0	26.7	7	60.6	5.3	0.4	3.94	135	40.9	103.7	34.4	330	74	109.9	149	0.14	9.1	16.4	10.3	0.86	131.5	30.3	2.63	17.9
307	1	55	3	2	0	1	0	0	0	6	0	3	840	140	0	1	22.7732	1	0	100	4.6	1.7	0.4	2.5	0.1	0	35.7	8.1	54.7	1.4	0.1	4.78	152	45.7	95.7	31.8	333	45.4	12.9	218	0.21	9.7	16.2	10.4	0.86	131.5	30.44	3.19	15.7
308	1	54	3	2	0	1	0	0	0	5	0	3	700	140	0	1	22.7732	1	0	100	5.2	2.4	0.5	2.2	0	0	46.6	10.3	42	0.7	0.4	4.66	151	46	98.7	32.4	328	54.2	15.1	194	0.21	10.6	16.7	10	0.83	139.6	29.4	2.75	16.2
309	1	54	3	2	0	1	0	0	0	4	0	3	560	140	0	1	22.7732	1	0	100	4.5	1.9	0.6	2	0	0	42.7	12.7	43.6	0.6	0.4	4.47	142	43	96.1	31.9	330	50.2	14.3	243	0.23	9.6	16.2	10.2	0.84	136.8	27.9	3.88	14.9
310	1	54	3	2	0	1	0	0	0	3	0	3	420	140	0	1	22.7732	1	0	100	7.5	2.3	0.6	4.5	0.1	0	31.1	8.4	59.2	1.3	0	5.01	158	48	95.8	31.6	329	53.4	15.2	227	0.27	11.8	16.7	10.1	0.83	139.6	31.3	3.7	14.7
311	1	79	3	2	1	1	1	1	0	5	1	4	900	180	1	1	24.3375	2	0	100	7.3	0.5	0.6	5.6	0.5	0.1	7.4	8.2	77.3	6.4	0.7	3.24	4120	35.3	108.8	37	340	59.5	17.6	172	0.15	8.9	16.3	11.4	0.95	109	27.9	5.89	15.7
312	1	63	3	1	0	2				3	1	3	660	220	0	1	23.9869	1	0	100	4.7	1.3	0.5	2.7	0.1	0	28.2	10.8	58.7	1.6	0.7	4.19	136	41	97.8	32.6	332	68.6	19.4	168	0.2	11.7	17.2	11.2	0.94	111	24.6	4.09	18.6
313	1	72	5	5	1	1	0	0	0	4	1	4	800	200	0	1	21.048	2	1	100	5.4	1.1	0.5	3.7	0.1	0	20.8	9.5	67.5	1.8	0.4	3.36	102	32.5	96.8	30.5	314	78.9	22.8	133	0.11	8.5	15.8	11.1	0.93	115.1	25.3	4.63	14.7
314	1	72	5	5	1	1	0	0	0	5	1	4	1000	200	0	1	20.3223	2	1	100	9	1	0.7	7.2	0.1	0	11.6	7.3	80.4	0.6	0.1	3.7	116	36.3	98.1	31.5	320	68.7	19	88	0.09	10.5	16.4	10.2	0.85	134.1	25.1	5.28	14.5
315	1	72	5	5	1	1	0	0	0	6	1	4	1200	200	0	1	21.7738	2	1	100	2.8	0.9	0.7	1	0	0	34	27.2	37	1.1	0.7	3.29	102	32.2	98	31.1	317	61.4	17.2	145	0.14	9.7	16.3
316	2	55	5	5	1	3				8	1	4	1440	180	1	1	21.2306	1	0	100	5	1.7	0.5	2.6	0.2	0	34.4	10.8	51.5	3.3	0	4.05	132	40.6	100.2	32.5	325	54.2	14.7	144	0.14	10	16.2
317	2	49	3	1	0	3				2	0	3	400	200	0	1	21.0772	1	1	100	3	1.4	0.3	1.2	0.1	0	47.3	10.9	39.4	1.8	0.6	3.82	114	34.1	89.2	30	334	50.7	16.3	124	0.11	8.9	16.2	10.3	0.85	134.1	23.1	2.1	16.4
318	1	72	5	5	1					2	0	4	300	150	1	1	24.4261	2	0	90	3.5	1.1	0.3	1.9	0.2	0	31.2	9.9	53.8	4.8	0.3	3.96	114	33.8	85.4	28.8	337	50.6	17.1	164	0.16	9.4	16.2	11.6	0.98	103.3	24.2	2.29	16.1
319	2	63	3	0	0	3				2	1	2	360	180	0	1	22.4766	1	0	100	4.3	1	0.3	2.9	0.1	0	23	8	66.7	2.1	0.2	3.85	112	34.1	88.7	29.1	328	66.9	20.5	264	0.22	8.3	15.1	11	0.92	117.2	24.7	3.5	16.2
320	1	70	4	1	0					4	1	4	600	150	1	1	19.2121	2	1	95	3	0.6	0.3	2	0.1	0	20	8.5	66.6	4.1	0.8	3.03	104	31.7	104.5	34.3	328	54.2	14.4	87	0.09	10.6	16.4	10.6	0.89	124.1	25.3	2.41	16
321	1	56	5	2	1	3				12	1	4	2880	240	0	1	21.7993	1	1	95	5.6	1	0.7	3.9	0.1	0	17.6	11.9	69.4	1.1	0	3.22	100	30.2	93.8	31.2	331	58.3	16.9	104	0.12	11.1	17.2	12	1.02	96.5	29.9	6.17	15.9
322	1	56	5	2	1	3				11	1	4	2640	240	0	1	21.7993	1	1	95	5.4	1.1	0.6	3.6	0.1	0	20.6	10.6	66.6	1.8	0.4	3.22	102	30.9	96	31.8	330	60.4	17.1	94	0.1	10.7	16.7
323	1	56	5	2	1	3				10	1	4	2400	240	0	1	21.7993	1	1	95	6.9	1	0.8	5	0.1	0	15	11.3	72.7	0.8	0.2	3.13	99	29.9	95.5	31.7	331	63.1	17.9	81	0.09	10.7	16.5
324	1	56	5	2	1	3				9	1	4	2160	240	0	1	21.7993	1	1	95	4.9	1.3	0.6	2.9	0.1	0	26.4	12.5	59.5	1.4	0.2	3.31	105	31.6	95.5	31.6	332	61.3	17.7	56	0.07	11.9	17.3
325	1	56	5	2	1	3				8	1	4	1920	240	0	1	21.7993	1	1	95	5.6	1.3	0.7	3.4	0.1	0	23.7	12.8	61.8	1.5	0.2	3.38	105	32.2	95.2	30.9	326	57.8	16.7	83	0.09	10.7	17.2
326	1	56	5	2	1	3				7	1	4	1680	240	0	1	21.7993	1	1	95	6.1	1.4	0.7	3.8	0.1	0	23.3	12.2	63.2	1.1	0.2	3.48	108	33.2	95.3	31	325	60.8	17.5	79	0.08	9.7	16.2
327	1	56	5	2	1	3				6	1	4	1440	240	0	1	21.7993	1	1	95	7.2	1.5	0.7	4.9	0.1	0	20.6	9.2	68.9	0.9	0.4	3.67	116	34.5	93.9	31.7	336	65.9	19	105	0.11	10.3	16.8
328	1	56	5	2	1	3				5	1	4	1200	240	0	1	21.7993	1	1	95	6.5	1.4	0.8	4.1	0.1	0	21.9	12.6	64	1.2	0.3	3.23	98	30	92.8	30.4	327	70.7	20.9	83	0.09	11.3	16.5
329	1	56	5	2	1	3				4	1	4	960	240	0	1	21.7993	1	1	95	6.2	1.1	0.6	4.5	0	0	17.3	9.4	72.8	0.3	0.2	2.99	86	26.6	88.9	28.6	323	61.5	19	120	0.13	10.4	16.6
330	1	56	5	2	1	3				3	1	4	720	240	0	1	21.7993	1	1	95	8.6	1.7	1.2	5.7	0.1	0	19.7	13.5	65.9	0.7	0.2	3.52	106	31.9	90.7	30	332	59.2	17.9	115	0.13	11.5	16.9
331	1	56	5	2	1	3				2	1	4	480	240	0	1	21.7993	1	1	95	11.6	1.9	1.6	8.1	0.1	0	16.2	13.7	69.6	0.4	0.1	3.65	108	33	90.4	29.5	327	59.3	18	115	0.12	10.6	16.4
332	1	56	5	2	1	3				1	1	4	240	240	0	1	21.7993	1	1	95	7.3	4.7	1.6	0.8	0.1	0	64.8	22	11.1	1.8	0.3	3.72	109	33	88.6	29.4	332	76.5	23.8	96	0.1	10.1	16.5
333	2	56	4	2	0	2	0	0	0	2	1	4	260	130	0	1	27.0552	2	1	100	3.2	1.1	0.4	1.7	0.1	0	33.5	12.3	51.8	2	0.4	4.12	128	38.5	93.5	31.1	332	45.5	13.4	209	0.24	11.3	16.4	10.3	0.85	134.1	23.6	3.26	16.5
334	2	71	4	1	0					4	0	3	800	200	0	1	20.9572	2	0	100	2.9	0.6	0.2	1.9	0.1	0	21.7	6.9	66	4.2	1.2	4.14	132	40.4	97.5	31.9	327	51.5	14.4	130	0.13	10.2	16	10.2	0.85	134.1	25.2	3.44	15.6
335	1	62	5	5	1					2	1	4	400	200	0	1	20.7612	1	1	100	4.4	1.9	0.3	1.9	0.3	0.1	43.7	5.7	43	6.2	1.4	3.24	104	31.8	98.1	32.02	327	57.1	15.9	258	0.24	9.4	16.1	10.9	0.91	119.4	28.9	3.47	17.2
336	1	62	5	5	1					3	1	4	600	200	0	1	20.7612	1	1	100	4.3	1.9	0.3	1.9	0.2	0	43.3	7	43.9	4.8	1	2.91	98	29.2	100.2	33.6	336	53.9	14.9	181	0.16	8.6	15.9	11.3	0.94	111	26.5	2.92	15.8
337	1	67	4	2	0					4	0	3	720	180	0	1	19.9481	1	0	100	3.7	0.7	0.4	2.3	0.2	0	19.8	11.8	62.3	5.5	0.6	4.06	115	35	86.3	28.4	329	44.3	14	209	0.2	9.5	15.9	10.4	0.87	128.9	24.5	3.06	16.3
338	1	65	4	2	5	3				4	1	4	600	150	1	1	23.4568	1	0	100	6.4	1.7	1.1	3.4	0.1	0	27.2	16.7	53.7	2.1	0.3	4.03	109	34.6	85.9	27.1	315	60.2	19.1	226	0.19	8.2	15.4	11.8	0.99	101.6	27.7	2.75	16.4
339	1	61	2	5	1	3	0	0	0	4	1	4	520	130	0	1	19.052	1	0	100	7.2	1.3	0.9	4.7	0.2	0	18.2	12	66.1	3.3	0.4	3.73	121	36	96.5	32.5	336	45.9	13.4	209	0.19	9.3	16.1	10.7	0.89	124.1	26.6	2.55	17
340	1	58	4	0	1	3	0	0	0	2	1	4	400	200	1	1	23.3844	1	1	100	3.9	1	0.5	2	0.5	0	24.7	12.1	51.5	11.5	0.2	4.73	114	36	76.1	24.2	317	91.4	34.5	197	0.2	10.4	15.3	10.5	0.88	126.5	14.7	2.18	17.1
341	2	72				3	0	0	0	9	0	4	1080	120	0	1	22.0317	2	1	100	3.9	1.2	0.41	2.2	0.1	0	31.6	9.3	56.6	2.3	0.1	4.02	135	40.4	100.4	33.6	334	48.3	13	88	0.11	12.5	16.8	10.9	0.91	117.2	26.2	3.48	16.7
342	2	68	2	1	0	3	0	0	0	5	1	3	825	165	1	1	24.8889	1	1	100	2.5	1.3	0.3	0.8	0	0	53.6	12.2	32.9	0.9	0.4	2.6	99	30	115.5	37.9	330	64.4	15	85	0.1	11.4	17.3	11	0.92	115.1	245.6	2.02	18.4
343	1	53	3	0	0	2				3	0	2	600	200	0	1	22.3094	1	1	100	4	1.4	0.4	2.1	0.1	0	33.7	10.5	52.5	2.9	0.4	4.82	145	43.1	89.5	30.1	336	574.6	18	131	0.127	12.9	16.2	10.8	0.9	121.7	24.2	1.95	17.4
344	1	60	1	2	1	1	0	0	0	5	1	4	1000	200	0	1	21.0772	1	0	100	3.9	1.3	0.4	2.3	0	0	32.2	9.3	57.4	0.7	0.4	3.29	1.4	32.3	98.2	31.7	322	65.5	18.6	131	0.12	8.7	16.1	11.2	0.94	111	24.5	30.9	15.6
345	2	62	3	0	0	4				2	0	2	300	150	1	1	15.8222	4	0	90	2.3	1.3	0.3	0.7	0.1	0	55	11.4	30.1	2.5	1	3.43	109	33.1	96.4	31.8	329	64	18.2	82	0.1	12.4	16.8	11.1	0.93	113	24.5	2	17.7
346	2	67					0	0	0	3	0	4	540	180	0	1	24.0346	1	1	100	22.7	1.6	1.2	19.7	0.2	0.1	7.1	5.1	86.9	0.7	0.2	3.02	93	29	96	3.1	321	108.4	28.9	87	0.09	10.1	15.7	11.9	1	99.8	23.5	1.9	18.1
347	1	68	2	1	0	4				4	0	3	800	200	0	1	20.2449	1	1	100	2.3	0.5	0.3	1.3	0.2	0	21.7	11.6	59.1	6.7	0.9	3.43	103	32.1	93.7	30	321	59	17.3	120	0.11	9.3	16.3	11.1	0.93	113	25	16.6	1.81
348	2	61	3	2	5	3	1	0	0	6	0	4	1080	180	0	1	23.7118	1	1	100	3	1.4	0.2	1.3	0.1	0	46	7.7	43.5	1.7	1.1	3.66	126	37.8	103.4	34.5	333	59.2	15.6	140	0.15	10.8	16.1	10.6	0.88	126.5	24.5	2.3	17.1
349	1	70	3	0	0	2	0	1	1	3	1	2	450	150	1	1	22.8571	2	0	100	4.6	1.5	0.4	2.7	0	0	31.7	9	58.5	0.6	0.2	4.25	136	41.2	96.9	31.9	330	52.8	13.9	178	0.18	9.8	16	10.5	0.87	126	25.1	3.02	15.9
350	1	48	4	2	4	1	0	0	0	10	1	3	1700	170	0	1	27.4587	1	0	100	5.1	1.9	0.5	2.7	0.1	0	36.9	9	52.2	1.3	0.6	4.77	141	42.7	89.5	296.6	330	47.8	14.8	140	0.14	9.9	16.6	10.2	0.85	134.1	25.4	3.72	17.3
351	1	73	3	2	0	3				6	0	4	1200	200	0	1	24.3865	2	0	100	4.8	1.3	0.5	2.9	0.1	0	27	10.3	60.8	1.3	0.6	5.34	130	40.1	75.1	24.3	324	61.5	22.9	318	0.27	8.4	15.1	10	0.83	138.5	24.8	2.74	15.9
352	1	67	5	5	1					2	0	4	400	200	1	1	26.7036	1	0	100	5.9	1.7	0.6	3.5	0.2	0	28.9	9.3	58.9	2.8	0.1	4.83	168	49.4	102.3	34.8	340	48.9	13.2	153	0.17	10.9	16.9	10.1	0.84	133.3	27.7	2.99	17.9
353	1	60	4	1	0		1	1	0	1	0	3	200	200	0	1	21.6049	1	0	100	4.2	1	0.4	2.7	0.2	0	23.4	8.8	63.1	3.8	0.9	3.82	119	36	94.3	31.1	331	55.5	16.1	175	0.15	8.8	15.7	10.8	0.9	119.2	28.7	2.85	16.3
354	1	67	3	1	1	3	0	1	0	2	0	4	400	200	0	1	23.8751	1	0	100	3.5	1.3	0.4	1.8	0.1	0	36.3	9.9	50	3.6	0.2	4.01	91	29	72.2	22.8	314	52.1	19.8	274	0.24	8.6	15.4	11.8	0.99	100.3	25.7	2.85	15.7
355	2	65	3	2	0	2				5	1	3	800	160	0	1	23.1111	1	0	100	4.3	2.3	0.4	1.5	0.1	0	52.8	10.1	35.1	1.6	0.4	3.46	117	34.7	100.2	33.8	337	66.8	18.1	176	0.16	9.1	15.8	10.7	0.9	119.2	23.9	2.55	16.7
356	2	60	4	2	0	2	0	1	0	5	0	3	1000	200	1	1	26.0262	1	0	100	2.2	0.9	0.2	1	0.1	0	41.5	10.2	45	2.6	0.7	3.16	100	31.4	99.5	31.6	318	81.7	22.3	107	0.09	8.7	15.9
357	2	60	4	2	0	2	0	1	0	4	0	3	800	200	1	1	26.0262	1	0	100	2.3	1	0.2	1	0.1	0	44	10.3	41.5	2.8	1.4	3.24	101	31	95.6	31.2	326	88.3	25.1	127	0.11	8.7	15.9
358	2	60	4	2	0	2	0	1	0	3	0	3	600	200	1	1	26.0262	1	0	100	2.6	0.9	0.2	1.4	0.1	0	34.5	8.3	53.5	2.7	1	3.8	112	35	92.1	29.6	320	97	29.2	161	0.14	8.6	15.7
359	1	73	4	2	0		0	1	0	4	0	3	760	190	0	1	23.7387	2	1	100	5.9	1.4	0.7	3.8	0.1	0	23	11.1	63.5	2.2	0.2	3.61	131	37.9	104.9	36.2	346	74.9	19.8	137	0.14	10	16.4	11.3	0.95	109	25.3	3.91	16.9
360	1	57	3	1	1	3	1	0	0	3	0	4	450	150	0	1	22.8374	1	0	100	6.3	1.7	0.9	3.5	0.2	0	27.1	13.6	55.6	3.3	0.4	3.99	132	39.8	99.8	33.2	332	69.5	19	95	0.1	10.9	16.4	10.7	0.89	121.7	22.6	2.73	16.5
361	1	74	4	1	0	3	0	0	0	4	0	3	720	180	0	1	23.5102	2	1	100	5	2.2	0.4	2.2	0.2	0	44.2	7.6	44.2	3.7	0.3	4.45	141	41.3	92.9	31.6	341	46.7	13.7	180	0.18	9.9	16.3	10.5	0.88	126.5	25.6	3.06	16.5
362	1	49	4	1	0	2				2	0	3	460	230	0	1	25.9516	1	1	100	3.5	0.6	0.2	2.7	0	0	18	5.3	76	0.3	0.4	3.88	126	38.3	98.7	32.4	329	55.8	15.5	214	0.19	8.8	16
363	2	60	3	0	0	3				5	0	2	950	190	1	1	24.5578	1	0	100	4.2	0.7	0.3	3.2	0.1	0	15.7	7.6	74.7	1.6	0.4	3.3	102	32.2	97.5	31	317	60.1	16.9	123	0.14	11.6	17	13.4	1.14	77.2	26.9	1.78	17
364	1	70	3	2	1	3				7	1	4	840	120	0	1	22.7732	2	0	100	4.5	1.4	0.4	2.5	0.2	0	30.8	9.5	55	4.2	0.5	3.66	99	31.1	84.9	27.1	318	52.2	16.6	184	0.18	9.9	15.9	12.9	1.1	83.3	28.5	2.5	16.3
365	1	61	3	1	0	4	1	0	0	3	0	3	570	190	0	1	25.3515	1	0	100	3.8	1	0.5	2.2	0.1	0	25.6	11.9	59.3	2.8	0.4	3.8	127	38.2	100.6	33.4	332	56.3	15.4	181	0.17	9.2	16.2	10.5	0.88	126.5	24.5	2.54	17.3
366	1	64	5	5	1	4	1	0	0	2	1	4	260	130	0	1	23.5078	1	0	100	6.4	1.4	0.4	4.5	0.1	0	21.6	6.5	70.3	1.4	0.2	3.81	98	30.8	80.8	25.6	318	51.2	17.4	178	0.16	9.2	15.8	10.8	0.9	119.5	23.9	3.48	16
367	1	73				3	1	0	0	3	0	4	570	190	0	1	23.4568	2	1	100	3.6	1.2	0.5	1.8	0.1	0	33.9	12.8	49.2	3.3	0.8	3.6	126	36.9	102.4	34.9	341	54.6	14.9	97	0.09	9.6	16.4	10.8	0.91	117.1	27.1	3.34	17.8
368	1	64	3	1	0	3	1	0	0	11	0	3	1650	150	0	1	21.1463	1	0	100	4.3	1.3	0.5	2.3	0.2	0	29.6	11.5	53.7	4.7	0.5	4.25	136	40.2	94.6	32.1	338	49.7	14.3	106	0.12	11.1	16.9	11.1	0.94	111	28.3	2.46	17.2
369	1	67	4	0	0	3				5	1	3	600	120	0	1	20.0474	1	0	100	3.3	0.4	0.3	2.5	0.1	0	12.9	9.1	73.9	3.6	0.5	3.56	98	30.1	84.6	27.5	326	47.5	15.4	177	0.14	8.1	15.8	10.9	0.91	117.2	26.8	3.48	15.6
370	2	76	5	5	1		1	0	0	4	0	4	400	100	0	1	24.3232	2	0	95	9.7	2.4	0.7	6.2	0.4	0.1	24.3	7.3	64.3	3.6	0.5	3.66	117	36.2	98.9	32	323	50.7	14	188	0.18	9.5	16.1	10.6	0.88	123.6	23.9	2.59	17.8
371	2	72	4	1	0	2				5	1	3	750	150	0	1	26.6389	2	0	100	3.1	1	0.3	1.7	0.1	0	32.4	9	55.1	3	0.5	3.27	93	30.7	94	28.6	303	74.1	22.1	200	0.2	9.9	15.7	10.7	0.89	121.7	24.5	2.54	16.5
372	1	44	3	0	0	3				4	0	2	800	200	1	1	24.3046	1	1	100	7.2	2.6	0.6	3.6	0.4	0	35.9	8.3	50.5	4.9	0.4	4.81	155	45.6	94.7	32.3	340	58.7	17.2	221	0.21	9.6	16.4	10.2	0.85	133.3	23	2.59	16.3
373	1	72	5	5	1	1	0	0	0	6	1	4	1200	200	0	1	20.3223	2	1	100	13.1	1.1	1.5	10.4	0.1	0	8.7	11.4	79.4	0.5	0	2.98	91	28.4	95.3	30.6	320	61.1	17.5	61	0.07	11.2	16.6	10.7	0.9	119.2	25.4	3.41	16.8
374	1	60	4	1	0	3	0	0	0	2	0	4	400	200	0	1	24.9135	1	1	100	4.8	1.6	0.4	2.5	0.3	0	33.5	8.4	52.1	5.4	0.6	5	147	44.6	89.2	29.5	330	49.5	15.3	209	0.25	12	16.7	11	0.92	115	26.3	5.84	14.8
375	1	58					1	0	0	4	0	4	600	150	0	1	26.0262	1	1	100	3.9	1.3	0.3	2.1	0.1	0	34	8.7	55	2.2	0.1	4.37	158	46.6	106.6	36.1	339	52.5	13.6	124	0.15	11.7	16.8
376	1	58	3	0	1	3	0	0	0	6	1	4	1254	209	0	1	19.2672	1	1	100	3	0.6	0.4	2	0	0	21.3	12.4	65.3	0.6	0.4	3.76	125	37.3	99.1	33.2	335	49.4	13.5	74	0.08	10.1	16.6	10.4	0.87	126	29.6	3.19	17.5
377	1	56	4	1	1	3	1	0	0	7	0	4	1050	150	0	1	25	1	0	100	7	1.1	0.2	5.5	0.1	0	16	3.4	78.7	1.6	0.3	4.53	139	42	92.7	30.7	331	50.2	15	208	0.2	9.7	16	10.6	0.89	124.1	25.6	2.94	17.8
378	1	34	5	5	1		1	0	0	4	0	4	780	195	0	1	16.7062	2	1	100	4.3	1.6	0.3	2	0.3	0	36.4	8	47.4	8	0.2	4.88	140	42.7	87.6	28.7	328	103.1	32.1	184	0.14	7.6	15.3	10.9	0.91	117.1	25.1	2.39	16.1
379	2	62	3	1	0	3	0	0	0	2	0	3	340	170	1	1	21.2084	1	1	100	5.2	1.5	0.4	3.2	0.1	0	28.6	7.4	62.7	1.1	0.2	3.71	120	36.7	98.8	32.3	327	57.7	16.1	170	0.16	9.4	15.8	10.7	0.9	119.2	25.8	2.7	17.1
380	1	39	3	2	0		0	0	0	5	0	4	750	150	0	1	17.9462	1	0	100	17.6	0.9	1.8	14.9	0	0	5.2	10.1	84.7	0	0	3.43	107	31.8	92.6	31.1	336	61	18.1	193	0.21	10.8	16.3	11.6	0.97	103.7	30.2	12.25	14.1
381	2	70	3	0	0	3	1	0	0	3	0	2	450	150	1	1	22.719	2	0	100	3.5	1.3	0.2	1.9	0	0	37.2	6.3	54.6	1.2	0.7	4.18	135	40.7	97.4	32.3	332	57.8	16.4	133	0.15	11	16.9	10.4	0.87	126	27.2	2.86	16.9
382	2	68	3	2	0	1				6	1	3	720	120	0	1	27.7344	1	0	100	4.1	1	0.6	2.5	0.1	0	24.1	13.8	60.4	1.4	0.3	3.8	125	37.5	98.7	32.8	333	78.1	21.8	106	0.1	9.1	16	9.4	0.78	158.3	22.7	4.22	17.1
383	2	68	3	2	0	1				3	1	3	360	120	0	1	27.7344	1	0	100	5.3	1.3	0.6	3.3	0.1	0	25.4	11	62	1.2	0.4	5	141	42	84.1	28.2	335	76.8	25.9	157	0.14	8.9	15.6	9.4	0.78	158.3	20.7	3.67	17.6
384	1	65	5	5	1		0	0	0	11	0	4	2288	208	0	1	22.0386	1	0	100	5.4	1.5	0.5	2.9	0.5	0	27.8	8.6	53.9	9.1	0.6	2.96	112	34	114.8	37.7	329	76.6	18.2	124	0.1	8.3	16.2	11.3	0.95	109	27.6	4.45	15.3
385	1	77	3	1	0	3				1	0	3	180	180	0	1	27.9421	2	0	100	3.9	0.9	0.4	2.6	0.1	0	23.1	9.4	64.99	1.8	0.8	4.37	122	36.2	82.9	27.9	337	46.8	15.8	93	0.08	8.7	15.9	10.6	0.88	123.6	23.9	2.69	16.4
386	1	63	3	2	1	1	0	0	0	3	0	4	600	200	0	1	21.2585	1	0	100	5.2	1.1	0.7	3.3	0.1	0	21.4	12.7	63.6	2.1	0.2	3.68	121	35.3	95.8	32.7	343	75.2	21.5	82	0.09	10.4	16.4	10.4	0.87	126	26.7	4.56	15.1
387	1	73	3	0	0	3				2	1	4	400	200	1	1	23.8895	2	0	100	3.9	1.1	0.4	2.3	0	0	28.2	11.1	59.6	0.9	0.2	3.9	97	30.5	78.2	24.8	318	73.8	26.4	180	0.17	9.5	15.8	11.6	0.97	103.7	22.4	2.35	16.6
388	1	58				3				4	0	4	600	150	0	1	24.8457	1	1	100	3.7	1.5	0.3	1.7	0.2	0	40.6	7.8	45.5	6	0.1	4.05	142	42.6	105.1	35.2	333	79.8	20.8	140	0.13	9.6	16.7	10.1	0.84	136.8	31	3	17.8
389	2	60	4	0	0	3				2	1	2	360	180	0	1	22.4059	1	0	100	3.7	0.9	0.5	2.3	0	0	24.4	12.3	62.3	0.9	0.1	3.48	109	32.4	93	31.4	336	65.8	19.3	97	0.08	8.4	16	10.5	0.88	123.7	25.2	2.75	16.6
390	1	73	3	0	0	3	1	0	0	4	0	2	800	200	0	1	23.3556	2	0	100	4.2	1.2	0.5	2.4	0.1	0	27.7	11.5	57.4	3.2	0.2	4.51	132	40.3	89.4	29.3	328	79.1	24.6	116	0.12	10.1	16.1	11.2	0.94	111	24	2.28	16.3
391	1	63	3	2	0		1	0	0	5	0	4	900	180	0	1	17.3061	1	1	100	5	0.6	0.6	3.5	0.2	0	12.9	11.7	70.7	4.1	0.6	3.84	128	38.1	99.1	33.4	336	60.5	16.9	119	0.12	9.6	15.9	11.1	0.93	113	24.8	2.89	15.6
392	1	65	4	2	5	3				5	1	4	750	150	1	1	23.3556	1	0	100	6.4	2	1	3.2	0.2	0	31.5	15.2	50.4	2.4	0.5	3.83	107	33.4	87.2	27.9	320	58.9	18.5	114	0.1	8.9	15.4
393	2	72	3	2	0	3	1	0	0	2	1	3	360	180	1	1	27.8852	2	0	100	4.3	1.2	0.3	2.7	0.1	0	28.5	7.7	61.5	1.9	0.4	4.33	140	41.6	96	32.4	337	56.1	16.2	146	0.13	9.1	16.1	10.9	0.91	117.2	29.7	3	16.9
394	2	62	3	1	0	2				5	0	3	900	180	0	1	25.2595	1	0	100	4.4	1.7	0.5	2.1	0.1	0	38.8	10.6	48.2	1.5	0.9	4.05	119	37.3	92.2	29.5	319	64.2	19.2	156	0.16	10	15.5	11.6	0.98	103.3	27	2.73	17.1
395	2	61	4	1	1	2				11	1	4	1650	150	1	1	22.6562	1	1	100	2.4	1.2	0.2	0.9	0.1	0	50.7	9	36.9	3	0.4	3.62	117	34.4	94.9	32.2	340	60	17.7	106	0.1	9.1	16.1	10.8	0.9	1199.5	22.8	2.54	16
396	2	61	4	1	1	2				10	1	4	1500	150	1	1	22.6562	1	1	100	2.5	1.2	0.2	1	0.1	0	48	8.5	40.2	2.7	0.6	3.82	117	35.3	92.5	30.6	331	53.2	16.3	98	0.09	9.3	16.2	10.9	0.91	119.4	23.1	1.93	17.3
397	2	61	4	1	1	2				9	1	4	1350	150	1	1	23.0469	1	1	100	2.9	1.2	0.2	1.4	0.1	0	41.1	7.6	48.3	2.5	0.5	4.01	117	36.3	90.4	29.3	322	45.3	13.9	106	0.1	9	15.8	11.6	0.97	105.2	23.4	2.2	16.9
398	2	71	3	2	0	1	1	0	0	3	0	3	600	200	1	1	26.4463	2	1	100	3.6	1.1	0.4	1.9	0.2	0.1	30.3	9.8	54.1	4.4	1.4	3.93	129	39.2	99.7	32.8	329	56.7	15.7	130	0.15	11.7	16.2	10.6	0.89	121.4	26.3	3.34	15.8
399	2	64	3	1	0	3				5	0	3	900	180	1	1	22.7732	1	0	100	3.9	1.2	0.5	2.1	0.1	0	31.1	13.1	52.4	2.9	0.5	3.36	120	36	107.2	35.6	333	64.5	16.5	105	0.11	10.4	16.4	10.7	0.89	121.7	25.7	2.22	18.6
400	2	69	3	1	0	3	0	0	0	7	1	3	1400	200	1	1	17.9931	1	0	100	2.5	1.1	0.4	0.8	0.1	0	44.5	15.6	33.7	5.7	0.5	3.18	100	30.9	97.3	31.4	324	48.1	13.7	92	0.1	11	16.9	10.2	0.85	134.1	22.8	2.48	16.4
401	2	49	3	1	0	3				3	0	3	600	200	0	1	21.0772	1	1	100	2.7	1.3	0.4	1	0.1	0	49.7	13	35.5	1.8	0	3.65	113	33.5	91.7	30.8	337	70.6	21.4	96	0.1	10.5	16.6	10.2	0.85	130.8	21.5	2.55	15.3
402	2	72	5	5	1	2				5	1	4	975	195	0	1	24.8889	2	1	90	5.3	1.5	0.4	3.3	0.1	0	27.8	7.5	62.5	1.7	0.5	3.08	106	31.4	101.9	34.5	338	64	17.4	128	0.12	9	16.4	12.4	1	100	31.3	3.38	17.3
403	1	47	2	2	0	2	0	0	0	8	1	3	1120	140	0	1	22.4913	1	1	100	3.9	1	0.3	2.5	0	0	26.2	8.7	63.8	1.1	0.2	3.82	112	33.9	88.7	29.4	330	48.7	14.9	140	0.14	9.7	16.3	10.2	0.85	130.8	25.4	3.67	16.9
404	1	47	2	2	0	2	0	0	0	7	1	3	980	140	0	1	20.7612	1	1	100	4	1	0.4	2.5	0.1	0	26.1	9	63.2	1.2	0.5	3.98	115	34.7	87.3	28.9	331	57.3	18	103	0.1	10	16.1	10.1	0.84	136.8	24.7	3.26	16.9
405	1	62	5	5	1					4	1	4	800	200	0	1	20.0692	1	1	100	4.6	1.7	0.3	2.5	0.1	0	37.7	6.3	53	2.2	0.8	2.94	99	30.4	103.3	33.8	326	63.9	17.1	210	0.17	8.1	15.7	10.5	0.88	126.5	26.1	2.89	16.1
406	1	48	4	2	4	1	0	0	0	11	1	3	1870	170	0	1	27.4587	1	0	100	4.9	1.7	0.5	2.5	0.1	0	35.1	11.1	52.1	1.2	0.5	4.69	141	42.2	89.9	30	334	48.7	14.9	120	0.11	9.4	16.3	10.2	0.85	130.8	25.3	3.77	17.1
407	2	77	3	1	0	3	1	0	0	1	1	3	180	180	1	1	21.0962	2	0	95	4.7	1.8	0.6	2.1	0.2	0	37.4	12.7	44.7	4.7	0.5	2.78	89	27.4	98.6	32	325	54.3	15.4	138	0.12	8.4	15.6	11.8	1	99.8	22.9	2.29	17.1
408	1	61	2	5	1	3	0	0	0	5	1	4	650	130	0	1	18.4425	1	0	100	7.9	1.2	0.7	5.6	0.3	0.1	15.2	9.3	70.8	3.9	0.8	3.8	122	37.1	97.7	32.2	329	49	13.8	225	0.22	9.9	16.1	10.3	0.86	131.15	28.8	2.83	16.3
409	1	69	4	0	1	3				6	1	4	1200	200	1	1	27.7551	1	1	100	7.8	1.6	0.5	5.4	0.2	0.1	21	6.3	69.1	3	0.6	4.05	122	36	88.9	30.2	339	45.6	14	342	0.31	9.1	15.6	10.9	0.91	117.2	25.1	6.95	15.6
410	2	56	4	2	0	2	0	0	0	3	1	4	390	130	0	1	28.8889	2	1	100	2.7	0.9	0.5	1.2	0	0	34.2	18.9	45.3	1.5	0.1	3.98	123	37.3	93.8	31	330	47.8	13.8	172	0.21	12	16.3	10	0.83	139.6	23.6	3.26	15.9
411	2	63	3	0	0	3				3	1	2	540	180	0	1	20.635	1	0	100	2.7	0.9	0.4	1.3	0.1	0	33.4	14	48.3	3.7	0.6	3.47	107	32.1	92.4	30.8	333	71.1	21.1	162	0.14	8.6	15.4	11.6	0.97	103.7	24.6	2.96	16.4
412	1	61	2	1	0	2	0	0	0	5	0	3	1000	200	1	1	23.7118	1	0	100	3.5	1	0.4	2.1	0	0	28	12.3	58.4	1.1	0.2	3.86	134	39.9	103.4	34.6	336	52.6	14	126	0.12	9.8	16.3	11.6	0.98	103.3	25.9	2.26	17.3
413	1	59	5	5	1	3				3	0	4	450	150	0	1	22.4913	1	0	100	3.8	0.7	0.2	2.8	0.1	0	18.6	5.5	72.4	2.7	0.8	3.75	130	38.8	103.4	34.6	335	47.8	12.7	122	0.15	12.2	16.7	11.5	0.96	105.5	26	2.39	15.6
414	1	60	3	0	0	3				9	1	2	1800	200	0	1	22.0522	1	0	100	3.8	1.1	0.3	2.3	0.1	0	27.9	8.9	60.9	2	0.3	3.74	90	29.1	77.7	24	309	69.2	24.4	81	0.08	10	15.4	10.1	0.84	133.3	24.1	2.13	17.1
415	1	72	5	5	1					3	0	4	450	150	1	1	24.4261	2	0	95	3.3	0.9	0.3	1.9	0.2	0	26.4	7.8	58.2	6.7	0.9	3.66	109	33	90.1	29.8	330	73.9	23.1	150	0.14	9.2	16.2	12	1.01	96.5	21.9	1.95	15.5
416	2	58				4				3	0	4	600	200	0	1	18.5178	1	0	100	3.7	1.1	0.4	2.2	0	0	29.5	9.6	59	0.8	1.1	3.82	122	36.9	96.6	31.9	331	46.8	13.3	100	0.1	9.6	16.2	11.1	0.93	113	24.2	3.72	15.2
417	1	73	3	1		1				5	0	3	1000	200	0	1	21.9713	2	1	100	2	0.8	0.2	0.9	0.1	0	40.7	10.6	42.9	4.3	1.5	3.68	112	34.4	93.5	30.5	326	76.1	22.2	151	0.13	8.5	15.4	11.6	0.98	103.3	25.9	2.18	15.4
418	1	56	5	2	1	3				13	1	4	3120	240	0	1	22.1453	1	1	95	10.4	0.8	1	8.6	0	0	8	9.2	82.6	0.1	0.1	3.21	99	29.7	92.4	30.9	333	60.9	18.1	89	0.1	10.7	16.8	13.4	1.15	77.1	32.6	7.73	15
419	1	70	2	1	0	3	1	0	0	1	0	4	200	200	0	1	21.7181	2	0	95	3.5	0.7	0.3	2.5	0.1	0	20.3	7.8	69.3	2	0.6	3.93	123	36.9	93.9	31.2	333	46	13.6	95	0.12	12.9	16.7	10.6	0.88	123.6	23.6	2.39	16.4
420	1	88								6	0	4	600	100	0	1	17.5697	2	1	90	5.7	1.1	0.6	3.8	0.1	0	20	10.7	66.6	2.4	0.3	3.02	86	27.5	90.9	28.6	313	49.2	14.8	192	0.16	8.1	15.6	12.8	1.08	85.6	26.6	5.84	15.6
421	1	68					0	0	0	6	0	4	1200	200	1	1	20.5151	1	0	100	4.7	1.7	0.5	2.4	0.1	0	35.3	10.7	51.4	2.1	0.5	4.31	113	33.9	78.7	26.3	334	48.7	16.6	92	0.11	11.8	16.4	11.7	1.02	96.9	27.6	3.89	15.2
422	1	69					0	0	0	7	0	4	1400	200	1	1	20.5151	1	0	100	6.6	1.8	0.5	4.1	0.2	0	27.8	7.1	62.1	2.7	0.3	4.59	117	36.3	79.1	25.5	322	50	17	114	0.13	11.8	15.8	12.9	1.13	81.2	28.3	4.02	15.8
423	1	69					0	0	0	8	0	4	1600	200	1	1	20.5151	1	0	100	5.7	1.7	0.4	3.6	0.1	0	29.3	6.9	61.9	1.5	0.4	4.55	119	37	81.4	26.1	322	53.8	18.5	110	0.14	12.5	16.5	12.7	1.11	83.5	29.6	4.31	15.7
424	1	71	4	1	0	3				3	0	3	600	200	0	1	20.9573	2	0	100	3	1.1	0.3	1.5	0.1	0	35.9	10.3	49.6	3.4	0.8	3.57	112	33.2	93	31.5	337	57.1	17.2	149	0.14	9.3	16.1	10.9	0.94	105.9	26.1	2.53	17.1
425	1	71	4	1	0	3				4	0	3	800	200	0	1	20.6193	2	0	100	2.9	1.2	0.3	1.3	0.1	0	41.6	11.2	43.3	3.4	0.5	3.63	119	35.3	97.2	32.8	337	67.3	19.2	124	0.13	9.1	16.1	11.4	0.99	100.9	24.4	3.36	15.6
426	1	71	4	1	0	3				5	0	3	1000	200	0	1	20.9573	2	0	100	3.8	0.9	0.3	2.4	0.2	0	23.7	7.4	63.3	4.9	0.7	3.17	105	31.5	99.4	33.1	333	66.6	18.5	109	0.11	9.8	16.1	10.9	0.94	105.9	27.2	3.05	16.7
427	2	51	4	0	0	2	0	0	0	3	0	2	450	150	0	1	19.6506	3	0	100	4.9	2.5	2	0.3	0.1	0	50.5	40.3	7.1	1.6	0.5	3.48	104	31.6	90.9	29.9	329	65	19	278	0.23	8.9	15.8	11	0.95	104.9	26.4	3.7	16.5
428	2	52	4	0	0	2	0	0	0	4	0	2	600	150	0	1	19.6506	3	0	100	4.9	2.7	1.7	0.4	0.1	0	55	34.2	8.7	1.4	0.7	3.18	98	30.7	96.4	30.8	319	64.3	18.1	183	0.18	9.7	16	11.4	0.99	100.9	25.6	3.12	16.5
429	2	52	4	0	0	2	0	0	0	5	0	2	750	150	0	1	19.91	3	0	100	4	2.3	1.3	0.4	0.1	0	56.9	32.3	8.9	1.6	0.3	3.16	97	30	95	30.8	324	64.4	18.2	195	0.2	9.7	16.2	10.9	0.95	105.9	26.2	3.29	16.6
430	2	52	4	0	0	2	0	0	0	6	0	2	900	150	0	1	20.9321	3	0	100	12.1	0.8	0.7	10.5	0.1	0	6.6	5.5	87.1	0.8	0	2.5	72	21.9	87.4	28.8	329	55.6	17.1	98	0.11	11.7	16.8	10.4	0.9	111.4	23.7	2.96	16.3
431	1	56								2	0	4	300	150	1	1	19.8962	1	0	100	9.8	2.3	0.8	6.5	0.2	0	23.2	7.8	66.3	2.3	0.4	3.82	126	36.8	96.3	32.9	342	61.1	17.5	124	0.15	11.7	16.7	10.2	0.85	133.3	24.2	3.37	16.9
432	1	56								3	0	4	450	150	1	1	19.8616	1	0	100	9.4	1.6	0.7	6.9	0.2	0	17.1	7.7	73.4	1.6	0.2	3.95	133	38.7	98	33.7	344	59.3	16.6	89	0.12	13.6	16.9	11	0.92	115	22.7	3.09	15.8
433	1	58	3	1	0	3				6	1	3	1200	200	1	1	21.4692	1	1	100	6.1	2.9	1	2.2	0.1	0	47.7	15.6	35.5	0.9	0.3	3.96	130	39.8	100.4	32.7	327	61.6	16.9	238	0.22	9.3	16.3	10.8	0.9	119.5	25.2	4.71	15.7
434	1	58	3	1	0	3				2	0	3	380	190	1	1	19.0311	1	0	100	3.1	1.5	0.4	1.3	0	0	46.8	11.1	40.8	0.8	0.5	3.75	109	33.1	88.2	29.1	329	69.4	22.3	155	0.15	9.5	16	11.4	0.96	105.4	24.7	2.13	17.1
435	1	60	1	2	1	1	0	0	0	6	1	4	1200	200	0	1	21.0772	1	0	100	5	1.7	0.3	3	0	0	32.7	6.8	59.4	0.8	0.3	3.61	115	35.3	97.7	32	326	75.6	21.5	140	0.11	8.1	15.6	10.9	0.91	117.2	24.5	3.26	16.1
436	1	68	4	2	1	5	0	0	0	5	1	4	650	130	0	1	22.0386	1	0	100	4.1	1	0.4	2.5	0.1	0	25.4	10.1	61.1	2.8	0.6	4.23	132	40.8	96.5	31.2	324	47.5	13.5	198	0.25	15.5	16.3	10.1	0.87	114.9	26.3	2.35	18.3
437	1	68	4	2	1	5	0	0	0	6	1	4	780	130	0	1	23.5304	1	0	100	4.8	1.3	0.3	2.7	0.4	0	27.6	6.9	57.2	7.4	0.9	3.84	121	36.4	94.8	31.4	332	46.2	13.3	253	0.29	13.1	16	10.9	0.94	105.9	25.5	2.32	17.5
438	1	68	4	2	1	5	0	0	0	7	1	4	910	130	0	1	22.6562	1	0	100	7.6	1.5	0.6	5.3	0.1	0.1	19.6	8.2	69.5	1.8	0.9	4.01	124	38.8	96.7	31	320	50.3	14.4	271	0.35	14.7	16	10.4	0.9	111.4	26	2.24	17.9
439	1	68	4	2	1	5	0	0	0	8	1	4	1040	130	0	1	22.2656	1	0	100	9.4	1.2	0.5	7.6	0.1	0	13	5.1	80.7	0.8	0.4	4.07	126	39.1	96	31.1	322	52.8	15.1	292	0.35	12.6	15.9	10.4	0.9	111.4	23.8	2.53	17.1
440	1	68	4	2	1	5	0	0	0	9	1	4	1170	130	0	1	21.4536	1	0	100	7.5	0.9	0.4	6.1	0.1	0.1	12.5	5	80.9	0.9	0.7	3.65	114	34.5	94.6	31.1	330	48.6	14.1	283	0.3	12.5	16.5	10.5	0.91	110.2	23.7	2.49	17.2
441	1	68	4	2	1	5	0	0	0	10	1	4	1300	130	0	1	21.7193	1	0	100	11.2	1.7	0.5	9	0	0	14.9	4.5	80.3	0.1	0.2	3.85	119	37.2	96.6	31	320	49.8	14.2	242	0.31	13.1	16.1	10.3	0.89	112.5	22.8	2.42	16.6
442	1	68	4	2	1	5	0	0	0	11	1	4	1430	130	0	1	22.2063	1	0	100	5.3	1	0.3	3.8	0.1	0	18.3	6.4	72.8	1.7	0.8	3.4	110	32.4	95.2	32.3	340	47.3	13.5	392	0.33	9.6	15.5	10.3	0.89	112.5	25	1.98	16.4
443	2	44	2	2	0	2	1	0	0	1	0	3	200	200	0	1	30.385	1	0	100	4.6	1.4	0.6	2.5	1	0	31.4	12.2	54.2	2	0.2	4.16	122	37.8	90.9	29.5	323	47.7	14.5	272	0.26	9.6	15.5	10.2	0.85	133.3	23.9	3.09	15.2
444	2	70	2	2	0	3				6	1	3	1080	180	0	1	27.0552	2	1	100	3.4	1	0.2	2.1	0.1	0	30.3	6	61.5	1.6	0.6	4.4	128	38.7	88	29.1	331	64.7	20.2	109	0.11	10.1	15.9	10.9	0.91	117.1	23.4	2.9	15.3
445	2	66	5	5	1					2	1	4	360	180	1	1	20.4467	1	1	100	3	1.2	0.3	1.4	0.1	0	40.9	8.9	46	3.7	0.5	4.01	114	34.9	87.1	28.4	327	78.2	25	181	0.19	10.7	15.7	10.6	0.89	121.4	25.3	2.5	15.8
446	1	60	4	1	2					2	0	4	280	140	1	1	22.4913	1	0	100	9.5	1.9	0.4	7.1	0.1	0	20.4	3.9	74.6	0.7	0.4	4.64	143	42.3	91.2	30.8	338	46.5	14.1	163	0.2	12.2	16.3	11	0.92	115.1	24.2	3.56	14.8
447	2	73	3	1	0	3				1	1	3	180	180	0	1	19.8141	2	0	100	9.6	1	1.1	7.4	0	0	10.6	11.6	77.3	0.2	0.3	3.79	112	33.4	88.1	29.5	335	44.6	14.1	271	0.21	7.7	15.7	10.7	0.89	121.4	24.8	4.85	14.3
448	1	70	4	1	0					5	1	4	750	150	1	1	20.0474	2	1	95	4	0.5	0.3	3.1	0.1	0	12.2	8	77.6	2	0.2	3.1	108	33.2	107.2	34.8	325	67.6	17.1	91	0.09	10.3	16.5
449	1	60	4	1	0		1	1	0	2	0	3	400	200	0	1	20.679	1	0	100	5.5	1.1	0.5	3.7	0.2	0.1	20.5	8.6	66.5	3.3	1.1	3.67	118	35.3	96.2	32.1	334	55.8	16	145	0.12	8.4	15.5	10.6	0.88	123.6	25.7	2.74	16.2
450	1	67	4	2	0					5	0	3	900	180	0	1	19.5717	1	0	100	4.9	1.1	0.5	2.9	0.3	0	21.9	10.3	60.3	6.7	0.8	4.37	127	37.8	86.5	229	336	45	14.3	277	0.26	9.2	16.1
451	1	72	2	1	0	4	1	0	0	5	1	3	1000	200	0	1	17.9931	2	0	100	3.2	0.5	0.5	2	0.2	0.1	16.3	14.6	60.8	6.7	1.6	3.57	119	36.3	101.7	33.4	328	57.6	15.4	93	0.09	9.4	16.3	10.8	0.9	119.2	29	1.92	16.3
452	2	72				3	0	0	0	10	0	4	1200	120	0	1	22.0317	2	1	100	3.7	1.1	0.3	2.2	0.1	0	30.5	7.2	59.3	2.3	0.7	3.78	128	37.6	99.6	33.8	340	44.2	12.2	70	0.08	11.6	17	10.8	0.9	119.2	26.7	3.02	19.2
453	1	77	3	1	0	3				2	0	3	360	180	0	1	28.0404	2	0	100	3.2	1	0.4	1.7	0.1	0	30.6	13.7	53.1	1.6	1	4.33	124	37.1	85.6	28.6	334	57.7	18.9	121	0.11	9.1	15.9	11.1	0.93	113	23.5	3.53	15
454	2	62	3	0	0	4				3	0	2	450	150	1	1	15.4297	4	0	100	2.8	1.3	0.3	1.1	0	0	47.6	10.4	39.9	1.4	0.7	3.4	109	33.1	97.4	32	329	53.4	15	91	0.122	12.9	17	9.9	0.83	138.6	22.3	1.9	16.8
455	1	34	5	5	1		1	0	0	5	0	4	975	195	0	1	16.7062	4	1	100	3.8	1.4	0.4	1.8	0.2	0	37.1	10.5	46.5	5.7	0.2	5.04	145	44.4	88	28.8	327	98.9	30.8	180	0.15	8.1	15.6	10.9	0.92	115	24.6	2.65	15.9
456	2	67	3	2	5	3	1	0	0	4	0	4	640	160	0	1	19.7239	1	0	100	4.1	2.1	0.3	1.7	0.1	0	49.6	6.1	41.5	2.1	0.7	4.05	130	39.2	96.8	32.2	332	64.2	18.2	149	0.15	10	16.2	9.9	0.82	141.3	26.1	2.79	16.3
457	2	67	3	2	5	3	1	0	0	5	0	4	800	160	0	1	19.8791	1	0	100	4	1.8	0.3	1.8	0.1	0.1	44.3	7.5	45	2	1.2	3.84	127	37.9	98.7	33.2	335	57.9	16	175	0.18	10.5	16.3	10.1	0.84	136.8	25.7	3.64	15.2
458	1	70	3	2	1	3				8	1	4	960	120	0	1	22.7732	2	0	100	6.2	1.2	0.5	4.2	0.2	0	19.9	8.8	67.6	3	0.7	3.73	101	31.8	85.2	27.1	318	46.9	15.1	245	0.25	10	16.1	12	1.01	97	27	3.02	14.1
459	1	64	5	5	1	4	1	0	0	3	1	4	390	130	0	1	23.5078	1	0	100	5.7	1	0.4	4.3	0.1	0	17.3	6.2	75.1	1.1	0.3	3.74	103	31.5	84.1	27.5	327	59.1	19.4	167	0.16	9.8	16.2	10.8	9	119.2	22.9	309	15.6
460	1	77	4	1	5		0	0	0	1	0	4	150	150	0	1	23.5078	2	0	100	3.2	1.1	0.3	1.6	0.3	0	33.3	88.1	49.4	8.3	0.9	4.18	124	37.8	90.4	29.7	328	44.9	13.7	204	0.2	10	16.3	10.2	0.85	133.3	26.1	4.57	15.8
461	2	67	2	1	0	4				1	1	3	120	120	0	1		1	0	100	6.3	2.1	0.4	3.7	0.1	0	32.6	6.6	58.5	1.9	0.4	4.34	132	39.5	91	30.4	334	43.3	13.1	189	19	10.3	15.8	11.4	0.96	105.4	262	3.77	17.2
462	1	72	5	5	1	1	0	0	0	7	1	4	1400	200	0	1	20.3223	2	1	100	10.8	1.3	1	8.6	0	0	11.5	8.9	79	0.4	0.2	3.22	100	31.9	99	31	313	69.3	19.1	145	0.15	10.4	16.3	10.7	0.9	119.2	25.2	3.26	16.9
463	1	67	4	0	0	3				6	1	3	720	120	0	1	19.3792	1	1	100	5.7	0.4	4	4.7	0.1	0	7.8	6.4	83.2	2.2	0.4	3.49	98	29.6	84.9	27.9	331	46.1	14.9	116	0.11	9.2	16.4	10.8	0.9	119.2	23.7	3.53	15.4
464	2	76	5	5	1		1	0	0	5	0	4	500	100	0	1	24.864	2	1	100	7.6	2.1	0.7	4.4	0.3	0.1	28.1	9.8	57.8	3.4	0.9	3.82	122	37.7	98.7	31.9	324	50	13.9	161	0.16	9.9	16.1	10.8	9	119.5	24.4	2.59	17.6
465	2	68	3	2	0	1				7	1	3	840	120	0	1	27.7344	1	0	100	4.2	1.1	0.6	2.6	0	0	25.5	13	60.6	0.8	0.1	3.95	137	40.5	102.6	34.6	338	74.1	20.1	111	0.11	10.2	16.4	10	83	139.6	22.7	3.82	18
466	1	65	4	2	5	3				6	1	4	900	150	1	1	23.3556	1	0	100	6.3	1.8	0.7	3.7	0.2	0	28.8	10.6	58.1	2.3	0.2	4.06	114	35.1	86.5	28.2	325	55.2	17.3	77	0.07	87	15.6	11.6	0.98	103.3	28.3	3.12	16.2
467	2	67					0	0	0	4	0	4	720	180	0	1	24.4352	1	1	100	2.4	1	0.5	0.8	0	0	40.6	21.2	34.9	1.888	1.5	3.34	100	32	95.7	30	313	83.3	24.3	129	0.13	10.4	16	11.3	0.95	107.3	24.9	2.1	18.1
468	1	37	3	0	0	2	1	0	0	2	0	2	400	200	0	1	22.7244	1	1	100	5.5	2	4	2.9	1	0	36.6	78	53.4	21	1	4.37	135	40.9	93.7	30.7	330	57.4	16.7	183	0.18	9.7	15.5	10.2	85	134.1	23.2	1.95	17.3
469	1	37	3	0	0	2	1	0	0	3	0	2	600	200	0	1	22.7244	1	1	100	5.6	1.9	0.5	3.2	0.1	0	32.9	8.4	56.6	1.6	0.5	4.53	145	43.2	95.4	32	336	54	15.6	210	0.2	9.6	16.1	10.2	0.85	130.8	21.7	1.88	17.6
470	1	58				3				5	0	4	750	150	0	1	24.6914	1	1	100	3.2	1	0.3	1.8	0.1	0	31.7	8.8	54.8	4.4	0.3	4.17	147	44.2	105.9	35.2	333	72.7	18.6	239	0.21	8.7	16.1	10.3	0.85	130.8	32.5	4.44	17.7
471	1	73	3	0	0	3				3	1	2	600	200	1	1	24.5351	2	0	100	3.7	1.1	0.4	2.1	0	0	30.1	11.5	57.3	0.8	0.3	3.69	95	29.7	80.6	25.7	320	76.1	261	161	0.16	10.1	15.9	11.5	0.97	103.7	22.7	2.2	17.2
472	2	60	3	0	5	3	0	0	0	10	1	4	1300	130	0	1	22.151	1	0	100	3.3	1.4	0.4	14	0.1	0	41	12.9	42.3	3.1	0.7	4.35	120	36.1	83.1	27.5	332	47.1	15.6	186	0.2	11	16.3	10.2	0.85	133.3	24.5	2.54	17
473	2	60	3	0	5	3	0	0	0	9	1	4	1170	130	0	1	22.151	1	0	100	4.9	1.8	0.4	2.6	0.2	0	35.5	7.8	53	3.6	0.1	4.32	114	36	83.3	26.3	317	495	16.1	166	0.19	11.5	16.4	10.5	88	123.7	24.8	2.75	16.3
474	1	47	2	2	0	2	0	0	0	9	1	3	1260	140	0	1	22.4913	1	1	100	3.8	1	0.3	2.4	0	0	27.1	8	63.8	0.88	3	3.69	111	33.2	90	30.2	334	457	14	125	0.13	10.2	16.2	10.7	0.9	119.2	23.9	3.58	15.9
475	1	49	4	1	0	2				3	0	3	690	230	0	1	25.9516	1	1	100	3.1	0.7	0.1	2.3	0	0	21.2	4.4	73.88	4	0.2	3.58	122	36.4	101.7	24	335	61.6	16.9	123	0.11	8.9	16.1
476	1	65				2				6	1	4	1200	200	0	1	24.3375	1	0	100	3.1	0.8	0.3	1.9	0.1	0	26.8	10	61.2	1.6	0.4	3.87	136	40.8	105.3	35	333	65.5	16	58	0.09	14.9	16.9	11.3	0.95	109.1	27.6	3.7	15.5
477	2	55	5	5	1	3				9	1	4	1620	180	1	1	21.2306	1	0	100	6.9	1.9	0.6	4.2	0.2	0	27.5	8.3	61.8	2.3	0.1	3.82	122	37.8	98.9	31.9	323	52.6	14.3	243	0.23	9.5	16	11.1	0.93	113	23.8	6.07	15.3
478	1	39	3	2	0		0	0	0	6	0	4	900	150	0	1	17.9163	1	0	100	8.6	1.3	0.7	6.4	0.2	0	14.6	8.6	74.5	1.9	0.4	3.82	115	36.5	95.5	30.2	315	66.6	18.9	258	0.25	9.7	15.96	10.7	0.89	121.7	24.8	4.71	15
479	2	61	4	1	1	2				12	1	4	1800	150	1	1	22.6562	1	1	100	1.9	0.9	0.2	0.7	0.1	0	49	10	36.5	3.1	1.4	3.3	108	32.4	98.3	32.6	333	66.8	18.9	99	0.1	9.7	16.6	11.4	0.96	107.1	24.3	2.83	16.8
480	1	56	4	1	1	3	1	0	0	8	0	4	1200	150	0	1	24.6914	1	0	100	5.8	1.2	0.3	4.2	0.2	0	20.2	4.5	72.5	2.7	0.1	4.82	146	44.6	92.5	30.3	327	48.2	14.2	294	0.27	9.3	15.9	10.7	0.9	119.2	25.8	4.7	16.2
481	1	19	3	1	0	1				3	0	3	300	100	1	1	17.3589	1	1	100	3.1	1.2	0.3	1.6	0	0	39.6	8.4	50.5	1.3	0.2	4.81	150	45.3	94.1	31.1	331	59.4	17.5	176	0.18	10.4	16.1	11.6	0.98	102	28	1.61	17.45
482	2	65	3	2	0	2				6	1	3	960	160	0	1	23.1111	1	0	100	4.4	1.8	0.4	2	0.1	0	41.9	9.2	46.2	2.2	0.5	3.71	126	37.7	101.6	33.9	334	54.7	14.6	198	0.2	9.9	16.2	10	0.83	138.5	23.6	2.59	16.6
483	2	57	3	0	0	4				1	0	2	200	200	0	1	18.6851	1	1	100	10.1	1.2	0.8	8.1	0	0	12	7.8	79.9	0.1	0.2	3.69	106	32.1	87.1	28.8	330	44.4	14.2	218	0.22	10.3	16.4	10.8	0.9	119.2	23.3	1.95	16.3
484	1	63	3	2	1	1	0	0	0	4	0	4	800	200	0	1	21.2585	1	0	100	3.7	1.3	0.4	1.8	0.1	0	36.6	10.5	48.8	3.4	0.7	3.93	131	39	99.3	33.4	336	66.2	18.3	85	0.09	11.1	17.1	10.1	0.84	133.3	26.8	3.58	16.2
485	1	62	5	5	1					5	1	4	1000	200	0	1	20.0692	1	1	100	3.7	1.6	0.3	1.7	0.1	0	42.3	8.3	45	3.7	0.7	2.78	96	28.5	102.5	34.7	337	65.2	17.6	174	0.14	8	15.8	11.6	0.97	103.7	25.4	3.29	14.9
486	1	70	5	5	1					5	0	4	800	160	1	1	22.0386	2	0	100	4.2	1.1	0.6	2.5	0.1	0	25.5	13.8	58.9	1.3	0.5	3.1	110	32.1	103.6	35.3	343	70.9	18.8	172	0.16	9.4	16.1	11.1	0.94	111	25.5	2.7	16.2
487	1	70	5	5	1					4	0	4	640	160	1	1	22.0386	2	0	100	5	1.1	0.6	3.2	0.1	0	227	11.5	64.2	1.2	0.4	3.29	111	32.6	99.1	33.8	340	74.5	207	184	0.17	9.4	16	10.9	0.91	117.2	25.9	3.72	16.4
488	2	72	5	5	1	2				6	1	4	1170	195	0	1	24.8403	2	1	90	4.9	1.7	0.3	2.8	0.1	0	34	6.5	577.3	1.8	0.4	3.12	109	31.7	101.5	34.9	344	63.2	17.3	143	0.13	9.4	16.6	10.1	0.84	135.9	25.5	3.7	16.2
489	2	62	3	1	0	3	0	0	0	3	0	3	510	170	1	1	20.2913	1	1	100	5.4	1.3	0.4	3.7	0.1	0	23.8	7	67.7	1.2	0.3	3.89	123	3888.3	98.4	31.5	321	51.2	14.2	143	0.15	10.5	15.9	11.1	0.93	113	25.9	3.61	16
490	1	54	3	2	1	3	0	0	0	11	1	4	1650	150	0	1	23.3844	1	0	100	4.4	0.7	0.5	3.2	0.1	0	15.8	10.9	71.6	1.5	0.2	4.3	137	42.3	98.3	31.8	324	49.1	13.8	136	0.12	9	16.5
491	1	73	4	0	0	3	1	0	0	1	0	3	180	180	1	1	18.6453	2	0	100	4.8	1.1	0.3	3.2	0.1	0	23.2	6.7	68.1	1.4	0.6	4.67	138	40.6	87	29.5	340	47.6	15.3	128	0.14	10.8	16.2	10.6	0.89	124.1	24.3	1.88	16.3
492	1	64	5	1	0	3				3	0	4	600	200	1	1	18.7109	1	1	100	4.4	1.6	0.3	2.4	0.1	0	35.4	6.5	55	2.7	0.4	3.8	121	36.5	96	31.8	332	51	14.7	134	0.15	11.1	16.3	11.4	0.95	107.3	25.1	2.59	13.3
493	1	65	4	2	5	3				7	1	4	1050	150	1	1	23.6713	1	0	100	4.9	1.5	0.6	2.7	0.1	0	30.3	12.3	55.8	1.4	0.2	3.74	103	32.77	877.3	27.5	315	55.2	17.3	91	0.08	8.6	16	12.1	1.02	94.9	28.2	2.63	16.5
494	1	72	5	5	1					4	0	4	600	150	1	1	24.4261	2	0	95	2.8	1.1	0.3	1.2	0.3	0	38.2	9.7	42.6	8.9	0.6	3.49	109	32.2	92.4	31.3	339	76.5	22.7	157	0.14	9	16	11.6	0.98	103.3	22.5	2.05	15.7
495	1	60	4	1	2					3	0	4	420	140	1	1	21.4533	1	0	100	4	1.4	0.4	2.1	0.1	0	35	9.5	52.1	2.7	0.7	4.46	132	40.2	90.2	29.7	328	46.3	14.1	189	0.23	12	16.5	10.8	0.91	117.1	25.9	3.41	15.3
496	2	56	4	2	0	2	0	0	0	4	1	4	520	130	0	1	27.4714	2	1	100	3	0.7	0.3	1.9	0.1	0	24	11.3	61.6	2.5	0.6	4.01	127	37.9	94.5	31.7	335	45.5	13.3	189	0.23	12	16.4	10.2	0.85	134.1	22.5	3.33	16.1
497	2	66	5	5	1					3	1	4	540	180	1	1	20.4467	1	1	100	3.4	1.6	0.3	1.4	0.2	0	46.5	8.3	40.3	4.4	0.5	4.37	125	38.7	88.5	28.7	323	81.9	25.8	201	0.21	10.2	16	10.6	0.89	124.1	24.3	3	15.3
498	1	74	2	1	0		1	0	0	3	1	3	600	200	0	1	23.768	2	1	100	6.7	1.5	0.7	4.2	0.4	0	22.2	9.8	62.4	5.4	0.2	3.65	116	34.8	95.3	31.7	33	74.3	21.7	198	0.19	9.6	15.9	12.4	1.05	91	25.5	4.2	14.4
499	1	77	4	1	5		0	0	0	2	0	4	300	150	0	1	22.7732	2	0	100	3.2	1.2	0.2	1.6	0.2	0	37.6	7.2	48.3	6.6	0.3	4.15	122	37	89.1	29.3	330	45.4	13.9	117	0.13	10.7	16.6	9.9	82	142.5	26	4.71	15.2
500	1	59	5	5	1	3				4	0	4	600	150	0	1	21.7993	1	0	100	3.6	0.5	0.3	2.7	0.1	0	13.2	8	75.4	1.9	0.7	3.72	1288	38	102.1	34.3	337	51.3	13.8	100	0.12	12.2	16.7	11.7	0.98	102	26.6	2.5	15.3
501	1	73	3	1		1				6	0	3	1200	200	0	1	21.3839	2	1	100	2.7	0.7	0.4	1.4	0.1	0	26.4	15.8	51.77	4.9	1.2	3.52	106	33.4	94.8	30.2	317	87.1	25.4	167	0.15	8.8	15.5	11.3	0.95	1077.3	25.3	2.42	15.2
502	2	42	3	1	0	2				6	0	3	1140	190	0	1	19.9481	1	0	100	3.6	1.1	0.2	2.3	0	0	30	5.7	63.1	1	0.2	3.46	105	32.5	93.9	30.2	323	57	16.6	195	0.17	8.9	15.4	10.3	0.85	130.8	25.7	1.33	18.2
503	2	70	3	0	0	3	1	0	0	4	0	2	600	150	1	1	23.1247	2	0	100	2.9	1.1	0.3	1.4	0	0	377.9	9.5	50.1	1.1	1.4	4.1	130	39.9	97.4	31.8	326	55.7	15.6	131	0.15	11.6	16.6	10.2	0.85	133.3	26	2.42	17.6
504	1	67	4	0	0	3				7	1	3	840	120	0	1	19.3792	1	1	100	8.2	0.5	0.5	7	0.2	0	6	6.1	85.4	2.3	0.2	3.66	103	31.5	86.1	28.2	327	47.1	15.1	69	0.07	9.4	16.8	10.9	0.92	115	24.8	3.41	16.1
505	1	61	2	5	1	3	0	0	0	6	1	4	780	130	0	1	17.9089	1	0	100	4.7	1.2	0.4	3	0.2	0	25	8	63.5	3.3	0.2	3.95	126	39.1	99.1	32	322	50.1	13.77	149	0.16	10.8	16.6	9.9	0.82	142.5	26.7	2.54	16.9
506	1	57	5	5	1	2				2	1	4	260	130	1	1	22.6562	1	0	100	3.5	1.4	0.4	1.7	0.1	0	38.8	11.4	47.2	2.1	0.5	3.9	114	34.9	89.5	29.2	3277	44	13.5	304	0.25	8.3	15.8	10.3	0.86	128.3	23.88	5.27	16.6
507	1	57	5	5	1	2				1	1	4	130	130	1	1	22.6562	1	0	100	5	1.2	0.6	3	0.1	0	24.7	12.3	59.7	2.9	0.4	3.79	114	34.1	90.1	30.1	334	42.3	12.8	314	0.26	8.3	15.5	10.2	0.85	130.8	26.2	6.63	14.3
508	1	57	3	1	0					3	0	3	690	230	0	1	24.4898	1	0	100	4.6	1.4	0.3	2.8	0.1	0	30.5	7.5	59.7	2.2	0.1	4.16	123	38	91.4	29.5	324	61.8	18.5	124	0.13	10.7	16.3	10.2	0.84	136.8	26.2	2.38	17
509	1	57	3	1	0					4	0	3	920	230	0	1	25.1429	1	0	100	6.3	1.6	0.6	4.1	0.1	0	25.4	8.6	64.5	1.4	0.1	4.1	125	377.6	91.6	30.5	332	52.3	15.5	98	0.13	12.7	16.7	10.3	0.85	130.8	26.1	3.02	15.1
510	2	76	5	5	1		1	0	0	6	0	4	600	100	0	1	24.864	2	1	100	9.4	1.77	0.7	6.6	0.4	0.1	17.6	7.4	70.5	3.9	0.6	3.88	1277	37.9	97.7	32.7	335	49.1	14.3	139	0.13	9.5	16.3	10.2	0.85	134.1	23.2	2.73	21
511	1	58	3	1	0	3				3	0	3	570	190	1	1	19.3772	1	0	100	3.1	1.2	0.4	1.4	0	0	40.3	12.6	45.9	1.1	0.1	3.59	114	34.3	95.6	31	332	87.2	25.3	140	0.14	9.8	16.2	11.4	0.95	107.3	24	2.25	15.888
512	2	72	4	1	0	2				6	1	3	900	150	0	1	26.6389	2	0	100	4.2	1.4	0.4	2.3	0.1	0	33.8	0.3	55.1	2.4	0.4	3.29	95	30.6	93.1	28.8	310	73.2	22	208	0.21	10.1	15.8	10.4	0.87	128.9	23.9	2.59	15
513	2	67	2	1	0	4				2	1	3	240	120	0	1	22.8928	1	0	100	7.8	2	0.6	5	0.1	0	26.2	7.3	64.5	1.6	0.4	4.71	147	44.2	93.8	31.2	333	49.9	14.9	243	0.23	9.5	15.9
514	1	34	5	5	1		1	0	0	6	0	4	1170	195	0	1	16.7062	4	1	100	6.1	1.6	0.6	3.7	0.3	0	25.7	9	60.8	4.1	0.4	4.75	139	41.5	87.4	29.2	335	100	31.6	159	0.14	8.5	16.1	10.8	0.9	119.2	23.7	2.54	15.7
515	2	62	3	1	0	3	1	0	0	1	0	3	180	180	0	1	29.1363	1	0	100	4.3	1.5	0.5	2.1	0.2	0	35.7	10.4	49.4	3.7	0.8	3.78	105	32.7	86.5	27.7	321	54.2	17.4	179	0.18	9.9	15.5	10.6	0.89	124.1	24.3	3.12	15.8
516	2	71	3	1	0	3				2	0	3	280	140	0	1	19.7777	4	1	100	3.8	1.2	0.2	2.3	0.1	0	31.1	5.9	60.1	2.3	0.6	4.05	127	39.2	96.9	31.5	324	52.2	14.9	197	0.18	8.9	15.5	10.4	0.86	128.3	21.5	2.39	16.1
517	1	56	4	1	1	3	1	0	0	9	1	4	1350	150	0	1	24.6914	1	0	100	6.6	1.1	0.3	5.1	0.2	0	16.5	4.1	76.4	2.4	0.6	4.84	149	45.2	93.3	30.7	330	48.1	14.3	182	0.19	103	16
518	1	58	4	0	1	3	0	0	0	4	1	4	800	200	1	1	23.3844	1	1	100	4.9	1.6	0.6	2.4	0.2	0	33.4	12.3	50.1	3.8	0.4	4.38	126	39.4	89.9	28.7	320	101.6	31.1	194	0.2	10.3	15.7	10.9	0.91	117.1	23.6	2.25	16.4
519	1	58	4	0	1	3	0	0	0	3	1	4	600	200	1	1	23.3844	1	1	100	4.1	1.1	0.5	2.4	0.1	0	26.5	11.8	58.8	2.5	0.4	4.32	118	36.5	84.5	27.2	323	106.4	35	128	0.14	10.7	15.4	10.4	0.86	128.3	23.9	2.22	17.1
520	1	54	3	2	1	3	0	0	0	12	1	4	1800	150	0	1	23.3844	1	0	100	4.4	0.6	0.5	3.2	0.1	0	13.7	11.8	72.5	1.6	0.4	4.42	140	43.1	97.4	31.6	325	477.4	13.4	185	0.16	8.6	16
521	1	47	2	2	0	2	0	0	0	10	1	3	1400	140	0	1	22.4913	1	1	100	4.2	0.9	0.4	2.9	0.1	0	21.2	9.9	67.4	1.2	0.3	4.07	122	36.6	90	30	333	45.9	13.9	115	0.12	10.5	16.4	10.4	0.86	128.3	23.4	3.53	15.6
522	1	65	5	5	1		0	0	0	12	0	4	2496	208	0	1	20.9366	1	0	100	6.3	1.7	0.5	3.3	0.7	0	27.5	8.3	53.2	10.5	0.5	3.1	113	34.2	110.2	36.6	330	69.8	17.1	139	0.1	7.3	16	11.9	1	98.6	28.5	5	15.4
523	2	58	4	2	0	3				1	1	3	200	200	1	1	23.634	1	0	100	3.6	1.5	0.4	1.6	0.1	0	41.8	9.8	45.9	1.9	0.6	4.07	102	32.6	80	25.1	313	59.9	20.6	200	0.2	10	16.2	10.1	0.84	136.8	21.8	3.64	14.7
524	1	70	2	1	0	3	1	0	0	2	0	3	400	200	0	1	21.3839	2	0	90	3.7	0.7	0.3	2.5	0.2	0	19.3	9.2	66.7	4	0.8	3.74	119	36.8	98.3	31.8	323	62.2	17.3	112	0.15	13.1	16.2	10.2	0.85	134.1	23	2.41	16
525	2	67	3	2	5	3	1	0	0	6	0	4	960	160	1	1	19.8791	1	0	100	4.5	1.7	0.3	2.3	0.2	0	37.3	7	50.4	4.7	0.6	3.78	127	37.7	99.7	33.5	337	57	15.6	126	0.13	10.7	16.7	9.8	0.82	141.3	26.7	3.12	16
526	1	60	4	1	0		1	1	0	3	0	3	600	200	0	1	20.679	1	0	100	5	1.2	0.4	3.2	0.1	0	24.5	8.5	63.9	2.4	0.7	3.58	118	35.6	99.4	33	331	58.9	16.2	152	0.14	9.1	15.8	11.1	0.93	113	24.6	3.02	15.5
527	1	77	3	1	0	3				3	0	3	540	180	0	1	28.0404	2	0	100	2.2	0.6	0.3	1.2	0.1	0	26	13.4	56.3	3.9	0.4	4.11	120	36.3	88.4	29.3	331	68.8	21.3	55	0.05	8.9	15.5
528	1	78	5	5	1	3				3	1	4	360	120	0	1	22.8625	2	0	100	3.4	1.5	0.4	1.4	0.1	0	43.1	12.7	41.9	1.9	0.4	4.36	124	37.3	85.6	28.5	332	43.6	14.1	80	0.06	7.7	15.4
529	2	62	3	1	0	3				1	1	3	200	200	0	1	24.0346	1	0	100	4.6	2.4	0.3	1.9	0.1	0	51	7	40.5	1.4	0.1	3.95	117	36.2	91.6	29.6	323	44.4	13.6	215	0.19	8.8	15.7
530	1	53	3	0	0	2				4	0	2	800	200	0	1	22.3094	1	1	100	3.7	1.4	0.4	1.8	0.1	0	38.1	11.6	47.1	2.6	0.6	4.53	141	41.5	91.6	31	340	59.9	18.2	92	0.12	13.2	16.2	10.2	0.85	130.8	23.1	1.95	16.9
531	1	53	3	0	0	2				5	0	2	1000	200	0	1	23.6652	1	1	100	4	1.4	0.4	2.1	0.1	0	34.1	10.4	51.8	3.3	0.4	4.72	14	44.7	94.6	31.2	329	59.4	17.3	97	0.13	13.4	16.8	10.1	0.84	133.3	23.2	1.93	16.6
532	1	51	5	5	1					3	0	4	540	180	0	1	27.3982	1	1	100	4.2	1.5	0.4	2.1	0.2	0.1	35.1	8.7	49.7	5	1.5	4.22	142	41.9	99.4	33.5	339	49.3	13.6	142	0.15	10.3	16.4	11.5	0.97	103.7	25.4	2.34	16.6
533	1	51	5	5	1					4	0	4	720	180	0	1	26.7299	1	1	100	3.5	1.2	0.3	1.9	0.1	0	33.5	88.3	54.5	3	0.77	4.3	145	42	97.6	33.7	345	46.1	13	118	0.12	9.9	16.5	11.1	0.93	113	23.1	2.25	15.9
534	2	57	3	0	0	4				2	0	2	400	200	0	1	18.6851	1	1	100	4	0.9	0.2	2.8	0.1	0	22.6	5.5	69.7	1.8	0.4	4.03	118	36.3	90.1	29.2	325	47.2	14.9	212	0.24	11.4	16.6	10.2	0.85	134.1	22.1	2.26	16.6
535	1	65	4	2	5	3				8	1	4	1200	150	1	1	23.6713	1	0	100	5.1	1.6	1	2.4	0.1	0	30.9	18.9	47.8	2	0.4	3.66	101	32.2	88.1	27.7	314	58.4	18.2	86	0.07	8.4	15.6	12.6	1.07	88.2	25.2	2.69	15.6
536	1	62	5	5	1					6	1	4	1200	200	0	1	19.3772	1	1	100	2.8	1.3	0.2	1.3	0	0	45.5	7	45.8	1.3	0.4	2.75	95	28.1	102	34.4	338	69.2	18.52	126	0.11	8	16.2	11.7	0.98	102	25.1	2.74	14.8
537	2	67					0	0	0	5	0	4	900	180	0	1	24.4352	1	1	100	2.8	1	0.6	1.1	0.1	0	34.4	19.9	40.1	5	0.6	2.99	91	28.6	95.5	30.4	318	90.2	26.4	54	0.06	10.9	16.3	11.9	1	98.6	24.2	1.83	23
538	1	70	5	5	1					6	0	4	960	160	1	1	22.7732	2	0	100	4.4	1.1	0.6	2.5	0.1	0	26	13.4	57.4	2.2	1	3.31	115	34.9	105.5	34.9	330	58	15	227	0.21	9.4	16	10.6	0.89	124.1	25.1	3.72	15.8
539	1	77	4	1	5		0	0	0	3	0	4	450	150	0	1	22.7732	2	0	100	3.2	1	0.4	1.6	0.3	0	31.8	11.1	48.8	7.8	0.5	3.33	100	29.4	88.2	30	340	46.1	14.4	134	0.13	10	16.4	10.6	0.89	124.1	28.2	6.5	14.7
540	1	19	3	1	0	1				4	0	3	400	100	1	1	17.3589	1	1	100	4.1	2	0.4	1.7	0.1	0	47.8	10.6	40.1	1.5	0	4.49	143	42.7	95	31.8	335	60	17.3	190	0.17	9	15.8	11.9	1.01	98.1	27.1	1.51	17.8
541	1	49	4	1	0	2				4	0	3	920	230	0	1	25.9516	1	1	100	2.5	0.7	0.2	1.7	0	0	25.5	6.9	67	0.4	0.2	3.39	118	35.5	104.6	34.7	332	63	16.8	115	0.11	9.2	16.4	10.9	0.92	115	24.5	2.55	17.2
542	2	56	3	0	0	3				1	0	2	150	150	0	1	19.5312	1	1	100	4.6	1.8	0.3	2.4	0.1	0	38.2	6.6	52.8	2	0.4	3.91	112	34.2	87.5	28.7	327	52.6	16.7	258	0.22	8.7	15.5	10.3	0.85	130.8	24	2.07	16.3
543	2	68	4	2	0	3				1	1	3	200	200	0	1	20.0777	3	0	100	3.9	1.9	0.5	1.2	0.2	0	49.8	13.7	31.4	4.2	0.9	3.79	111	34.1	90	29.4	326	58.6	17.9	105	0.11	10.7	16.6	10.6	0.88	123.6	23.7	2.64	15.7
544	2	63					0	0	1	1	0	4	130	130	0	1	22.8928	1	0	100	3.4	0.8	0.3	2.3	0.1	0	22.7	7.9	673	1.4	0.7	3.73	94	30	80.5	25.2	313	68.5	23.4	79	0.07	8.9	15.4
545	1	60	4	1	2					4	0	4	560	140	1	1	22.4913	1	0	100	2.9	1.2	0.4	1.3	0.1	0	41.8	12.5	42.8	2.3	0.6	4.34	131	39.1	90	30.2	335	46.9	14.3	134	0.15	11.2	16.3	11.1	0.94	111	26.5	3.12	15.9
546	1	57	5	5	1	2				3	1	4	390	130	1	1	22.6562	1	0	100	4.5	1.6	0.4	2.3	0.1	0	35.9	9.9	51.3	2.6	0.3	4.01	117	36	89.8	29.3	325	46.3	14.2	222	0.19	8.7	16	10.2	0.85	134.1	23.1	4.58	14.7
547	1	69					0	0	1	2	0	4	360	180	0	1	22.0386	1	0	100	4.7	0.9	0.4	3.4	0.1	0	18	8	70.7	2.6	0.7	3.43	105	30.8	89.9	30.6	341	52.1	16.2	153	0.15	10	15.9	11.1	0.93	113	25.3	4.45	14.8
548	2	72	3	2	0	3	1	0	0	3	1	3	540	180	1	1	27.8852	2	0	100	4.5	0.9	0.3	3.3	0.1	0	19.6	6.2	72.5	1.5	0.2	4.65	151	45.2	97.3	32.5	334	48.9	13.8	143	0.12	8.4	15.8	10.9	0.91	117.22	28.9	3.72	15.4
549	1	39	3	2	0		0	0	0	7	0	4	1050	150	0	1	18.2149	1	0	100	10.5	1.2	0.9	8.3	0.1	0.1	11.1	8.6	78.7	1.1	0.5	3.71	114	35.7	96.1	30.8	319	67.7	19.3	242	0.25	10.5	16.2	10.4	0.86	128.3	24.7	4.44	14.6
550	2	72	5	5	1	2				7	1	4	1365	195	0	1	25.1096	2	1	90	4.4	1.5	0.3	2.5	0.2	0	33.3	7.4	55.6	3.4	0.3	3.14	109	33	105.2	34.6	330	73.5	19.2	1122	0.11	9.3	16.5	10.2	0.85	134.1	25.2	2.73	16.5
551	1	58					1	0	0	5	0	4	750	150	0	1	26.0262	1	1	100	4.7	1.1	0.4	3	0.2	0	23.5	7.8	63.8	4.6	0.3	4.26	153	44.8	105.1	36	342	51.9	13.6	121	0.13	11	16.5
552	1	58					1	0	0	6	0	4	900	150	0	1	26.0262	1	1	100	3.4	1.1	0.3	1.8	0.2	0	33.6	8.2	53.4	4.5	0.3	4.25	149	44.5	104.7	35.1	335	56	14.6	86	0.1	12	16.8	10.1	0.84	136.8	26.5	3.72	17.5
553	2	38	3	0	0	3				1	0	2	180	180	1	1	19.9481	1	0	100	2.9	2.1	0.6	0.2	0.1	0	70.6	18.8	7.4	22.8	0.4	3.78	88	29.4	77.9	23.2	299	71.9	23.3	150	0.18	12.2	16.2	11.6	0.97	103.7	27.8	1.67	16.6
554	1	62	3	0	0	3	1	0	0	1	1	2	200	200	0	1	22.5309	1	0	100	4.1	1.5	0.5	1.9	0.2	0	35.9	11.3	46.3	5.9	0.6	3.86	126	37.2	96.3	32.5	339	48.4	14	146	0.14	9.6	16.3	10.8	0.9	119.5	23.1	2.22	16.4
555	2	67	2	1	0	4				3	1	3	360	120	0	1	22.3133	1	0	100	11.2	1.6	1.2	8.4	0	0	13.9	10.7	75	0.2	0.2	3.04	89	27.5	90.3	29.1	324	43.8	13.2	262	0.25	9.5	16.1	12.9	1.1	83.3	24.5	6.07	16.6
556	2	61	4	1	1	2				13	1	4	1950	150	1	1	22.6562	1	1	100	1.9	0.8	0.2	0.8	0.1	0	43.4	10.4	42	3.1	1.1	3.32	111	33.4	100.6	33.4	332	65.4	17.9	60	0.06	9.5	16.7	10.7	0.89	121.4	22.8	3.09	20.7
557	1	80				1	1	0	0	1	1	4	125	125	0	1	21.1073	2	0	100	5.9	1.9	0.6	3.3	0.1	0	31.3	9.8	56.5	1.8	0.6	4.34	133	40	92.2	30.7	333	50.6	15.1	188	0.19	10.3	16.1	11.1	0.93	113	25.8	2.02	16.4
558	1	72	5	5	1	1	0	0	0	8	1	4	1600	200	0	1	20.3223	2	1	100	5.8	0.5	0.4	4.8	0	0	8.9	7.5	82.8	0.5	3	3.05	99	30.5	100	32.4	325	58.7	16.1	41	0.04	10.5	17	9.5	0.78	154.9	21.4	1.99	17.1
559	1	72	5	5	1					5	0	4	750	150	1	1	24.4261	2	0	95	2.7	0.7	0.3	1.3	0.4	0	25.1	10.6	48.9	14.2	1.2	3.18	103	229.9	94	32.2	344	69.5	20.6	179	0.15	8.4	16.1	11.9	1	98.6	22.9	1.97	16.2
560	1	54	3	2	1	3	0	0	0	13	1	4	1950	150	0	1	23.3844	1	0	100	5.5	0.8	0.5	4.1	0.1	0	15.1	8.6	74.2	1.7	0.4	4.45	143	42.7	96	32	335	45.9	13.2	173	0.15	8.6	16
561	1	57					0	0	0	5	0	4	1000	200	0	1	24.3025	1	1	100	4.3	1.9	1.5	0.6	0.2	0	45.3	34.2	14.7	4.9	0.9	4.01	131	39.6	98.8	32.8	331	69.6	17.8	96	0.09	9.3	16.9	11.1	0.93	113	25	2.25	16.9
562	1	64	5	1	0	3				4	0	4	800	200	1	1	18.7109	1	1	100	3.9	1.3	0.3	2.22	0.1	0	34	7.1	56.3	2	0.6	3.82	122	37.1	97.1	32	329	55	15.8	69	0.08	11	16.4	11.1	0.93	113	24.6	3.99	14.6
563	1	78	5	5	1	3				4	1	4	480	120	0	1	22.8625	2	0	100	3	1.2	0.4	1.4	0.1	0	39	12.1	46.3	2.3	0.3	4.37	125	37.7	86.3	28.6	332	46.8	15.1	82	0.06	7.8	15.7
564	2	71	3	2	0	1	1	0	0	4	0	3	800	200	1	1	25.4581	2	1	100	4.3	1.4	0.3	2.5	0.1	0	33.1	7.1	57.2	1.6	1	3.82	122	37.77	98.6	32	324	53.1	14.7	139	0.17	11.9	16.5	10	0.83	139.6	26.1	3.4	16.6
565	2	61	3	2	1	2				1	0	4	120	120	0	1	21.4573	3	1	100	5.5	1.5	0.7	3.1	0.1	0	27.3	13.3	56.6	2.2	0.6	3.96	127	37.4	94.5	32.1	340	43.2	12.6	148	0.15	10	16.1	11.4	107.3	0.95	25.3	17.1	2.42
566	2	66	5	5	1					4	1	4	720	180	1	1	20.4467	1	1	100	2.9	1.2	0.2	1.3	0.2	0	41.7	7.9	44.4	5	1	4.24	131	39.3	92.6	31	333	78.1	23.3	136	0.14	10.2	15.7	10.2	134.4	0.85	23.9	15.6	2.83
567	2	64	4	1	5	2	0	0	0	5	0	4	500	100	0	1	19.5556	1	1	100	4	0.8	0.3	2.7	0.1	0	19.7	8.2	68.2	3.5	0.4	2.93	92	27.8	94.9	31.5	331	54.3	16	205	0.28	13	16.4	11.8	98.6	1	23.7	15.1	2.6
568	2	77	3	1	0	3	1	0	0	2	1	3	360	180	1	1	20.2848	2	0	100	3.9	1.6	0.7	1.5	0.1	0	41.2	17.3	38.6	2.5	0.4	2.75	88	27.6	100.5	32.2	319	66.5	18.2	137	0.12	8.4	15.9	16.1	1.4	56.8	28.1	2.46	17.2
569	2	77	3	1	0	3	1	0	0	3	1	3	460	180	1	1	22.3478	2	0	100	3.3	1.3	0.5	1.3	0.1	0	40.4	14.9	40.1	4.3	0.3	2.6	888	26.6	102.3	33.8	331	70.6	19.2	114	0.12	10.5	10	11.4	0.97	100.9	24.2	2.43	17.2
570	2	77	3	1	0	3	1	0	0	4	1	3	560	180	1	1	21.5045	2	0	100	3.7	1.5	0.9	1.2	0.1	0	39.5	23.8	33.4	3.1	0.2	2.89	95	29.2	101.1	32.9	325	64.9	17.5	107	0.09	8.8	16	11.1	0.93	113	22.3	3.91	16.6
571	2	62	3	1	0	3	0	0	0	4	0	3	680	170	1	1	19.4771	1	1	100	5.1	1.5	0.4	3.1	0.1	0	29.3	7.8	61.5	1.1	0.3	3.9	123	38.1	9777.8	31.7	323	51.6	14.3	114	0.12	10.9	16.2	11.1	0.94	111	27.6	3.12	17.4
572	1	70	3	0	0	2	0	1	1	4	1	2	600	150	1	1	22.8571	2	0	100	4.9	1.4	0.4	3	0.1	0	29.1	8	61.4	1.3	0.2	4.59	146	43.8	95.5	31.8	333	51.1	14.7	170	0.16	9.6	16	10.5	0.87	126	25.9	3.09	17.4
573	1	70	3	0	0	2	0	1	1	5	1	2	750	150	1	1	22.8571	2	0	100	4.9	1.5	0.3	3	0.1	0	30.8	6.8	61.3	1	0.1	4.39	140	42.3	96.3	31.9	331	51.7	14.7	201	0.19	9.3	15.6	10.4	0.86	128.3	23.5	2.79	16.4
574	1	63	3	2	1	1	0	0	0	5	0	4	1000	200	0	1	20.1956	1	0	100	4	1.6	0.4	1.8	0.1	0	40.1	10.1	45.8	3.3	0.7	3.83	128	37.6	98.4	33.3	340	54.6	15.2	87	0.1	10.8	16.7	10	0.83	138.5	26.5	3.29	16.1
575	1	48	2	2	0	2	0	0	0	11	1	3	1540	140	0	1	22.8374	1	1	100	2.7	1	0.3	1.4	0.1	0	35.4	9.8	52.5	1.9	0.4	3.85	116	35	91	30.2	331	44.3	13.3	107	0.12	11	16.3	10.2	0.85	133.3	24	3.09	16.1
576	1	34	5	5	1		1	0	0	7	0	4	1365	195	0	1	16.7062	4	1	100	5.3	1.6	0.5	2.9	0.3	0	30.3	8.8	55.3	5.3	0.3	4.72	139	42	88.9	29.5	331	100.2	31.3	285	0.15	7.9	15.8	10.6	0.89	124.1	23.9	3.82	15
577	1	53	3	2	0					2	0	3	440	220	0	1	25.9095	1	0	100	3.8	0.8	0.5	2.3	0.2	0	21.2	13.4	60.6	4.2	0.6	4.08	142	41.7	102.1	34.9	341	56.5	15.4	129	0.13	9.8	16.2	10.1	0.84	135.9	22.7	2.64	15.6
578	2	62	3	1	0	3	1	0	0	2	0	3	360	180	0	1	29.1363	1	0	100	5.6	1.3	0.5	3.5	0.2	0	24.1	9.3	63.3	2.8	0.5	3.79	110	33.1	87.3	29.1	332	58.6	18.9	231	0.22	9.4	15.8	10.6	0.88	123.6	22.5	3.37	14.4
579	1	65	4	2	5	3				9	1	4	1350	150	1	1	23.1978	1	0	100	7.4	1.6	1	4.7	0.1	0	21.6	13.9	62.6	1.3	0.6	4.12	117	36.2	87.8	28.3	323	58.8	18.6	141	0.12	8.3	15.9	11.8	1	98.6	25.5	3.41	17.7
580	2	69	4	1	0					7	0	3	1050	150	1	1	17.5781	1	1	100	4.2	1.5	0.4	2.3	0	0	35.4	9.6	54	0.5	0.5	3.87	121	37.3	96.3	31.3	324	54.2	15.4	148	0.14	9.7	16	10.8	0.91	119.5	28.1	2.7	18.3
581	2	69	4	1	0					6	0	3	900	150	1	1	17.5781	1	1	100	4.1	1.4	0.6	2.2	0.1	0	32.8	13.3	52.2	1,3	0.4	3.85	121	37.5	97.4	31.5	323	56.5	15.7	200	0.2	9.8	16	11	0.92	115.1	27.8	2.91	16.5
582	2	69	4	1	0					5	0	3	750	150	1	1	17.5781	1	1	100	4.3	1.6	0.6	2.1	0.1	0	36.5	13.5	47.9	1.4	0.7	3.62	117	36.2	100	32.3	323	60.1	16.5	246	0.25	10.3	16.4	11.1	0.93	113	29.3	2.75	17.9
583	1	58	3	1	0	3				4	0	3	760	190	1	1	19.3772	1	0	100	2.6	1.1	0.4	1	0.1	0	44.6	15.1	37.4	2.5	0.4	3.38	112	33.7	99.6	33.1	332	85.6	23.7	85	0.09	10.3	16.2	11.5	0.97	103.7	23.8	1.9	15.5
584	1	61	2	5	1	3	0	0	0	7	1	4	910	130	0	1	17.9089	1	0	100	8.2	1.3	0.5	5.9	0.4	0	16	5.7	72.8	5	0.5	4.16	140	40.9	98.2	33.5	342	45.6	12.8	129	0.12	9.4	16.1	10.3	0.86	128.3	26.8	2.42	19.5
585	1	68				2	0	0	0	7	0	4	1540	220	0	1	24.977	1	1	100	9.3	2.2	0.7	6.2	0.2	0.1	23	7.9	66.9	1.6	0.6	4.87	138	42	86.3	28.4	329	49.1	15.6	235	0.21	9.1	15.8	10.7	0.89	121.7	27.5	3.72	17.2
586	1	65	4	1	1	3				8	1	4	1120	140	1	1	17.3745	1	0	100	8.8	1.3	0.6	6.8	0.1	0	14.5	6.4	77.6	1	0.5	4.12	121	37.7	91..4	29.5	321	49..4	14..9	157	0.15	9.4	16	10.9	0.92	115	24.5	3.12	19.2
587	1	65	4	1	1	3				7	1	4	980	140	1	1	17.3745	1	0	100	7.7	1.3	0.5	5.8	0.1	0	17	6.3	75.3	1.2	0.2	4.04	118	36.6	90.7	29.3	322	46.2	13.9	170	0.16	9.1	15.9	11..4	0.95	107.3	24.8	3.29	15..9
588	1	65	4	1	1	3				6	1	4	840	140	1	1	17.3745	1	0	100	4.3	1.1	0.5	2.8	0	0	25.2	10.3	63.3	1	0.2	3.9	115	35.8	91.7	29.5	321	46.3	13.7	169	0.16	9.2	15.7	10.8	0.91	117.1	28.4	4.31	15.8
589	1	65	4	1	1	3				5	1	4	700	140	1	1	17.3745	1	0	100	6.4	1.4	0.6	4.3	0.2	0..1	21.2	9.5	66.1	2.5	0.7	4	123	37.6	94	30.8	327	55.1	16.1	155	0.16	10	16.2	11	0.92	115.1	25.5	2.84	13.9
590	1	65	4	1	1	3				4	1	4	560	140	1	1	17.3745	1	0	100	4.8	1.1	0.5	3	0.2	0	23.2	9.6	63.2	3.1	0.9	4.06	120	37.7	92.5	29.5	318	52.3	15.6	191	0.18	9.3	16.1	10.3	0.86	131.5	24.2	3.54	15.9
591	1	65	4	1	1	3				3	1	4	420	140	1	1	17.3745	1	0	100	6.6	1.1	0.6	4.8	0.1	0	17	8.4	72.8	1.7	0.1	4.47	132	40.5	90.7	29.6	326	47.2	14.4	203	0.18	9.2	16.1	10.4	0.86	131.5	23.8	3.39	15.6
592	1	57	2	0	0					3	1	1	600	200	1	0	25.5102	1	0	90	4.4	2.5	1.5	0.3	0.1	0	57	34.8	6.3	1.1	0.8	3.89	129	38.7	99.7	33.3	334	62.5	16.9	118	0.13	11.1	16.9	11.1	0.96	103.9	26.8	4.02	16.2
593	2	64	4	2	1	3	1	0	0	4	1	4	680	170	1	0	24.1965	1	0	100	5.3	3.7	0.9	0.7	0	0	69.4	17.4	12.2	0.7	0.3	3.79	134	37.8	99.7	35.3	353	70.7	19.1	106	0.1	9.4	16.3	10.8	0.94	107	23.9	4.43	16.9
594	1	64				1				1	0	4	180	180	0	0	19.2672	1	0	50	5.8	2.8	1.9	0.7	0.3	0	48.9	33.4	11.7	5.7	0.3	4.52	142	41	90.7	31.3	346	48.9	14.6	183	0.19	10.5	16.5	11.9	1.04	94	27.4	3.06	16.4
595	1	66								1	1	4	180	180	0	0	18.7328	1	0	100	8.2	5.3	2.1	0.6	0.1	0.1	65	26.2	6.9	1.2	0.7	3.65	103	31.9	87.4	28.4	325	56.9	18	371	0.28	8.3	15.2	12.3	1.07	88.5	27.3	4.12	16.8
596	1	66								2	1	4	360	180	0	0	18.7328	1	0	100	7.3	3.9	2.5	0.5	0.3	0.1	53.9	34.2	7.2	3.8	0.9	3.55	102	31.9	89.8	28.7	320	64.7	19.5	309	0.33	9.7	15.9	12.2	1.06	89.8	25.9	4.52	14.9
597	1	75					1	0	0	1	1	4	180	180	0	0	23.6244	2	0	100	3.8	2.5	0.9	0.3	0.1	0	65.6	23.4	8.5	2.2	0.3	3.82	83	27.1	71	21.8	306	71.2	27	199	0.17	8.5	15	11.4	0.99	100.9	26.4	3.05	16.1
598	2	62				3	1	0	0	1	0	4	180	180	0	0	22.0604	1	0	100	5.9	3.6	1.9	0.3	0	0	62	32.8	4.4	0.5	0.3	4.27	111	33.7	79.1	26	329	58.8	20.5	171	0.22	10.7	15.8	10.3	0.89	112.5	24	3.12	15.1
599	1	57	3	1	0	3				1	1	3	140	140	0	0	22.3094	1	0	90	6.5	4.4	1.6	0.4	0.1	0	67.6	24.7	6.5	0.8	0.4	3.2	102	29.1	90.9	31.9	351	58	17.3	150	0.14	9.2	16.4	10.7	0.93	108	24.2	4.61	15.9
600	1	69				3				3	1	4	600	200	1	0	22.3081	1	0	100	7.1	4.9	1.7	0.5	0.1	0	68.1	23.4	6.3	1.7	0.5	4.55	143	42.9	94.1	31.3	333	48	14	198	0.2	10.9	16.4	10.2	0.88	113.7	26.5	3.36	16.4
601	2	49				3	0	0	0	6	0	4	780	130	0	0	21.797	1	0	90	6.8	4.8	1.5	0.5	0	0	70.7	21.6	7.5	0	0.2	3.61	84	26.7	73.9	23.3	315	51	18.6	250	0.23	9.3	15.8	10.9	0.95	105.9	22	2.3	15.3
602	2	70				3	1	0	0	3	1	4	540	180	0	0	30.5438	2	0	100	9	6	2.3	0.5	0.2	0	66.9	25.6	2	2.1	0.4	4.38	146	42.8	97.7	33.4	341	60	16.8	248	0.23	9.1	15.8	10.5	0.91	110.2	25.6	5.14	15
603	1	65	2	1	0	3				1	0	3	140	140	0	0	20.0692	1	1	100	1.8	0.9	0.7	0.2	0.1	0	49.9	35.9	10.2	3.3	0.7	4.07	93	28.9	71	22.9	322	67.4	25.7	158	0.11	7.2	14.8	11.4	0.99	100.9	24.8	2.11	17.1
604	1	75					1	0	0	1	1	4	180	180	0	0	22.5827	2	0	90	9.3	7.5	1.4	0.3	0.1	0	80.5	15.3	3.2	0.8	0.2	2.55	60	19.5	76.5	23.4	306	74.7	28.6	162	0.14	8.9	15.2	12.2	1.06	89.8	26.2	2.2	15.8
605	1	51	4	1	0	3				3	1	3	420	140	0	0	27.4506	1	0	100	5.8	3.5	1.5	0.5	0.2	0	61.5	26.7	8.6	2.9	0.3	4.34	130	37.9	87.4	29.9	342	52.3	16.2	112	0.11	10.1	16.3	11.2	0.97	102.9	27.2	2.57	17.2
606	1	62								1	0	4	180	180	0	0	17.0433	1	0	100	9.3	7.1	1.2	0.9	0.1	0	77.2	12.5	9.2	0.8	0.3	3.24	96	28.3	87.4	29.8	341	52.2	16.2	349	0.33	9.4	15.6	13.2	1.15	77.9	32.2	3.42	17.2
607	1	47	3	1	0	3				1	0	3	120	120	0	0	22.7204	1	0	100	5.3	3.4	1.4	0.4	0.1	0	63.9	26.8	6.9	2.2	0.2	4.9	154	45.1	92.2	31.5	341	45.8	13.4	251	0.22	8.8	15.7	10.7	0.93	108	26.7	4.21	16.6
608	2	62				3	1	0	0	2	0	4	360	180	0	0	26.0146	1	0	100	4.8	3	1.5	0.3	0	0	62.1	31.4	5.5	0.7	0.3	4.01	110	33.1	82.6	27.3	331	68.8	23.1	230	0.24	10.5	15.7	10.7	0.93	108	24	3.05	16.8
609	1	66	4	1	0	3				1	1	3	130	130	0	0	23.0112	1	0	90	5.1	2.9	1.3	0.5	0.3	0.1	57	25.9	10	5.9	1.2	4.16	98	30.8	74	23.6	319	57.5	21.4	417	0.32	7.7	15	10.8	0.94	107	27.1	3.48	17.4
610	1	68	3	2	0	3	0	0	0	5	1	3	750	150	0	0	24.3375	1	0	100	4.8	2.7	1.3	0.6	0.1	0	57	27.1	13.3	1.8	0.8	4.66	126	38.4	82.3	27.1	329	47.1	15.7	188	0.18	9.4	15.9	10	0.87	116.1	27.2	2.89	18.4
611	1	63	4	0	0	3				1	1	2	140	140	0	0	20.898	1	0	100	3.3	1.4	1.5	0.4	0.1	0	42.1	44.4	11.5	1.7	0.3	3.21	106	31.6	98.4	32.9	334	49.3	13.4	121	0.14	11.2	16.3	12.3	1.07	88.5	26.8	2.57	18.5
612	2	70				3	1	0	0	4	1	4	720	180	0	0	30.5438	2	0	100	8.4	5.2	2.5	0.5	0.2	0	61.9	30.1	5.7	2.1	0.2	4.08	130	39.4	96.6	31.8	330	58	16.5	322	0.26	8.7	15.7	10.4	0.9	111.4	27.6	6.91	16.4
613	1	62								2	0	4	360	180	0	0	20.7612	1	2	85	10.3	8	1.6	0.7	0	0	77.3	15.3	7.1	0.2	0.1	1.07	31	10.4	97.1	29.1	300	61.3	17.2	231	0.22	9.8	16.3	13.1	1.14	79	26.1	2.49	17.4
614	1	55	4	0	0	3	0	0	0	4	0	2	800	200	0	0	26.9896	1	0	90	3.3	1.9	1	0.4	0.1	0	56.7	30.9	10.4	1.5	0.5	3.97	109	34.1	85.9	27.4	319	60.3	19.3	191	0.17	9.5	15.9	10.4	0.9	111.4	25.3	2.01	17.1
615	2	51	4	0	0	3				2	0	2	400	200	0	0	25.4581	1	0	100	4.2	2.2	1.7	0.3	0	0	51.2	40.9	6.3	1	0.6	5.01	143	43.2	86.2	28.6	332	40.9	13	233	0.2	9.1	15.9	9.7	0.84	120	23.9	2.53	18
616	2	40	4	0	0	2	0	0	0	5	0	2	1000	200	0	0	31.051	1	0	100	4.5	3	1.1	0.3	0.1	0	67.4	23.9	6.7	1.6	0.4	3.56	99	30.9	86.8	27.9	321	58.3	18.6	117	0.16	13.7	16.4	10.3	0.89	112.5	25.6	2.46	15.2
617	1	48	4	0	0	3	0	0	0	1	0	2	180	180	0	0	23.3887	1	0	100	4.3	2	1.7	0.3	0.3	0.1	46.5	39.2	7.5	5.7	1.1	4.12	129	39.1	94.9	31.3	330	49.7	14.5	211	0.24	11.6	16.5	11.1	0.96	103.9	28.8	2.46	17.6
618	2	62				3	1	0	0	4	0	4	720	180	0	0	21.8522	1	0	80	5.5	3.7	1.4	0.3	0.1	0	67.7	25.4	4.4	2.2	0.3	4.32	115	35.3	81.7	26.6	325	58.3	19.8	230	0.27	11	15.8	10.8	0.94	107	24.7	4.63	16
619	2	54								8	1	4	960	120	0	0	24.974	1	0	100	6.8	4.2	2	0.6	0.1	0	61	28.7	8.3	1.6	0.4	4.11	112	35.3	85.9	27.3	318	56.3	17.9	256	0.27	10.6	16	10.1	0.87	114.9	24.5	3.29	17.2
620	1	70	4	1	0	2				2	1	3	360	180	0	0	24.6548	2	0	100	3.9	2.3	1.2	0.3	0.1	0	59	30.1	8.3	1.8	0.8	4.42	146	43.7	98.9	33	333	54.2	15	125	0.13	10.9	16.6	11.4	0.99	100.9	27.6	3.94	16.9
621	1	56	2	0	1	3				1	0	4	200	200	0	0	20.4082	1	0	90	4.6	2	1.9	0.5	0.1	0	44	42.5	10.4	2.3	0.8	4.3	135	40	93.1	31.3	338	52.4	15.6	246	0.25	10.8	16.3	9.6	0.83	121.3	23.3	3.17	18
622	1	56	2	0	1	3				2	0	4	400	200	0	0	20.4082	1	0	90	4.2	2	1.7	0.3	0.1	0.1	40.7	8.1	47.9	2	1.3	4.46	142	42.6	95.6	31.9	333	62.8	18.3	203	0.23	11.2	16.2	9.1	0.78	128.5	23.1	2.99	16.2
623	1	77	4	2	1	3				1	0	4	130	130	0	0	23.5615	2	0	90	4.5	2.6	1.1	0.4	0.4	0	47.9	40.7	8.1	8	0.4	4.71	143	42.2	89.6	30.4	339	43.8	13.5	175	0.15	8.3	15.7	10.1	0.87	114.9	27.1	2.82	16.3
624	1	62	1	1	0	3				1	0	3	120	120	0	0	21.2245	1	0	100	5.1	1.4	0.6	2.9	0.2	0	28.2	11.5	56.4	3.4	0.5	3.79	128	38.4	101.2	33.9	333	48.2	13.1	283	0.25	9.3	15.8	10.7	0.9	121.7	26.2	3.67	14.6
625	2	59	3	0	0	3				3	0	2	360	120	0	0	26.9127	1	0	100	4	0.4	2.5	1	0.1	0	10.1	62.3	25.9	1.3	0.4	5.1	147	43.6	85.4	28.8	337	40.7	13.1	162	0.18	11	16.3	11.6	0.97	105.2	27.1	2.84	14.6
626	1	47	4	2	4	1	0	0	0	2	1	3	340	170	0	0	27.4587	1	0	90	4.7	0.4	2.7	1.4	0.2	0	8.9	56.6	29.1	4.8	0.6	4.21	103	32.2	76.5	24.6	320	52.8	18.9	139	0.11	8.2	15.7	11	0.92	115.1	26.7	3.43	14.3
627	1	55	3	2	5	3				2	0	4	400	200	0	0	24.1633	1	0	100	4.6	0.4	2.3	1.8	0.1	0	9.1	49.3	40	1.1	0.5	4.25	115	36.8	86.5	27	313	45.8	14.6	178	0.15	9.5	16	10.2	0.85	134.1	25.8	3.29	16.3
628	1	48	4	2	4	1	0	0	0	3	1	3	510	170	0	0	27.4587	3	0	100	4.5	0.4	2.6	1.5	0	0	8.5	56.3	34.1	0.7	0.4	3.38	108	32.5	96.1	32	332	70.8	20.6	205	0.17	8.2	15.8	11.6	0.97	105.2	26.9	3.19	14.3
629	1	37	5	5	1					1	0	4	120	120	0	0	21.1463	1	0	100	2.8	0.3	1.3	1.1	0.2	0	8.8	44.8	40.1	5.9	0.4	4.17	109	33.9	81.2	26.1	322	46.3	15.7	173	0.15	8.9	16.1	10.8	0.91	119.5	24.2	3.47	14.3
630	1	51	3	1	1	3	0	0	0	2	0	4	400	200	0	0	22.8374	1	1	100	2.8	1.1	0.3	1.3	0.2	0	40.1	8.8	44.8	5.9	0.4	4.17	109	33.9	81.2	26.1	322	46.3	15.7	173	0.15	8.9	16.1	10.8	0.91	119.5	24.2	3.47	14.3
631	1	67	4	0	0	3				2	1	3	240	120	0	0	19.3792	1	1	100	6	0.5	3.3	1.7	0.5	0	8.7	54.3	28.4	8	0.6	4.39	105	32.9	74.9	23.8	319	64.9	24.6	140	0.13	9.5	15.3	10.2	0.85	134.1	26.3	4.28	14.9
632	1	48	4	2	4	1	0	0	0	4	1	3	680	170	0	0	27.7743	1	0	90	4.8	0.4	2.8	1.6	0.1	0	8.5	57.2	32.3	1.8	0.2	4.55	127	39.6	87.1	28	321	47.7	15	146	0.13	9.1	16.1	10.5	0.87	128.9	24.1	3.13	16.1
633	2	63	3	0	0	3	0	0	0	3	1	2	360	120	0	0	22.806	1	1	100	5	1.1	1.7	2	0.3	0	21.1	33.1	40.1	5.1	0.6	3.62	112	34.5	95.4	31	325	57.4	16.6	217	0.19	8.8	16.3	11.3	0.95	109	20.8	3.85	14.1
634	2	63	3	0	0	3	0	0	0	2	1	2	240	120	0	0	24.4444	1	1	100	5	2	0.5	2.6	0	0	39.4	8.9	51.2	0.2	0.3	3.68	113	33.6	91.4	30.7	336	53.4	16.4	235	0.19	8.1	15.4	10.8	0.91	119.5	25.9	2.32	15.9
635	2	63	3	0	0	3	0	0	0	1	1	2	120	120	0	0	23.2446	1	1	100	4.3	1.2	0.4	2.7	0	0	27.9	8.8	62.2	0.9	0.2	3.75	108	33.6	89.5	28.7	321	43.5	13.6	233	0.18	7.9	15.4	11.5	0.96	107.1	27.9	3.32	14.5
636	1	57	4	1	0	3	1	0	0	1	0	3	100	100	0	0	22.9719	1	1	100	8.8	1	5.5	2.1	0.3	0	11	62	23.6	3.2	0.2	3.96	115	34.7	87.7	29.1	331	47.2	14.7	412	0.32	8.1	15.2	11.7	0.98	103.4	26.7	4.51	15.7
637	1	51	3	0	0	2	0	0	1	1	0	2	120	120	0	0	22.0386	1	1	100	4.4	0.4	2.2	1.7	0.1	0	8.9	49.3	38.1	3.2	0.5	3.93	117	35.6	90.5	29.7	329	67.3	20.4	143	0.15	10.6	15.8	11.1	0.93	113	25.1	2.4	18.3
638	1	51	3	0	0	2	0	0	1	2	0	2	240	120	0	0	22.0386	1	1	100	3.8	0.5	2	1	0.2	0	14.2	51.9	27.1	6.4	0.4	3.84	122	36.2	94.3	31.7	337	45.4	13.1	189	0.19	9.4	15.9	10.9	0.91	117.2	25.4	2.52	16.6
639	1	48	4	2	4	1	0	0	0	5	1	3	850	170	0	0	27.4587	1	0	80	4.7	0.3	2.8	1.5	0.1	0	6.2	59.2	32.8	1.2	0.6	4.72	136	42.2	89.4	28.9	322	50.9	15.7	138	0.14	10.3	16.4	10.5	0.88	126.5	23.9	3.47	17.1
640	2	76	5	5	1		1	0	0	1	0	4	100	100	0	0	23.8054	2	1	90	3.4	0.3	1.6	1.5	0.1	0	8.6	45.4	43	2.5	0.5	5.03	144	43.8	87.1	28.6	329	43.1	13.9	120	0.15	12.4	16	11	0.92	117.2	25	1.78	18.2
641	1	37	5	5	1					1	0	4	120	120	0	0	21.1463	1	0	100	3.1	0.4	1.6	0.9	0.2	0	12.6	52.5	27.8	5.7	1.4	4.33	140	41.4	95.7	32.3	338	47.8	13.8	115	0.11	9.4	16	10.5	0.88	126.5	25.4	2.97	16.1
642	2	51	3	0	0	3	0	0	0	1	1	2	180	180	0	0	25.2174	1	1	100	7	0.4	4.7	1.5	0.4	0	5.3	67.5	21.2	5.6	0.4	4.54	106	34	75	23.3	311	55.1	20.4	355	0.32	9	15.6	11.5	0.96	107.1	27.3	4.76	15.7
643	1	61	2	5	1	3	0	0	0	1	1	4	130	130	0	0	18.2899	1	0	100	4	0.5	1.9	1.2	0.3	0	13	47.2	31	8.2	0.6	4.03	119	34.6	85.8	29.4	344	38.5	12.8	159	0.16	9.7	16.1	10.4	0.87	128.9	25.1	3.22	17.2
644	1	48	4	2	4	1	0	0	0	6	1	3	1020	170	0	0	27.4587	1	0	100	4	0.5	1.9	1.2	0.3	0	13	47.2	31	8.2	0.6	4.03	119	34.6	85.8	29.4	344	38.5	12.8	159	0.16	9.7	16.1	10.3	0.86	131.5	24.8	2.9	16.2
645	1	53	3	0	0	2				1	0	2	200	200	0	0	22.4913	1	1	100	5	0.3	2.5	1.9	0.2	0	6.4	50.4	38.9	3.6	0.7	3.85	118	35.6	92.5	30.6	331	54.3	16	196	0.21	10.7	15.8
646	1	61	2	5	1	3	0	0	0	2	1	4	260	130	0	0	19.6235	1	0	100	3.3	0.4	1.7	1	0.2	0	13.1	51.3	29.4	5.4	0.8	4.46	116	36.1	81	26	321	51.9	17.5	178	0.17	9.3	15.9	11.3	0.95	109	23.2	2.26	16.4
647	1	51	3	0	0	2	0	0	1	3	0	2	360	120	0	0	22.7732	1	1	100	3.3	1	0.4	1.7	0.2	0	29.4	13.1	51.3	5.4	0.8	4.46	116	36.1	81	26	321	51.9	17.5	178	0.17	9.3	15.9	11.3	0.95	109	23.2	2.26	16.4
648	1	48	4	2	4	1	0	0	0	7	1	3	1190	170	0	0	27.4587	1	0	100	4.1	1.2	0.4	2.4	0.2	0	28.5	8.6	58.8	3.7	0.4	4.2	105	33.5	79.7	25	313	53	18.1	244	0.21	8.7	15.4	11.9	1.01	98.1	25.3	2.44	16.1
649	1	63	3	2	1	1	0	0	0	1	0	4	200	200	0	0	21.2585	1	0	100	5	0.7	2.9	0.8	0.5	0.1	13.9	58.6	16.1	10.5	0.9	4.09	117	36.4	88.9	28.6	321	43.6	13.4	259	0.24	9.1	16
650	2	51	3	0	0	3	0	0	0	2	1	2	360	180	0	0	25.2174	1	1	90	4.9	0.8	0.6	3.4	0.1	0	16.3	12.3	68.9	2.2	0.3	4.46	138	42.7	95.8	31	323	46.3	13.4	135	0.12	8.9	16.2
651	1	66	4	2	0	2	0	0	0	3	0	2	390	130	0	0	25	1	1	100	4.9	0.8	0.6	3.4	0.1	0	16.3	12.3	68.9	2.2	0.3	4.46	138	42.7	95.8	31	323	46.3	13.4	135	0.12	8.9	16.2
652	1	66	4	2	0	2	0	0	0	2	0	2	260	130	0	0	25.3906	1	1	100	4.6	0.8	0.7	3	0.1	0	18	14	65	2.7	0.3	4.62	146	44.1	95.4	31.5	331	46.1	13.2	141	0.13	9.2	16.1
653	1	66	4	2	0	2	0	0	0	1	0	2	130	130	0	0	24.4141	1	1	100	5.4	1	0.6	3.6	0.1	0	18.9	11.1	67.1	2.5	0.4	4.73	146	45.1	95.4	30.9	324	44.6	12.9	167	0.14	8.6	16.3
654	1	67	4	2	0					3	0	3	540	180	0	0	19.9481	1	0	100	5	1.1	0.7	3.2	0.1	0	21.3	13.3	63.1	2.2	0.1	4.77	152	46.3	97.1	31.9	328	46.5	13.1	146	0.14	9.2	16
655	1	54	3	2	1	3	0	0	0	8	1	4	1200	150	0	0	23.9158	1	0	100	5.1	1.2	0.6	3.1	0.1	0	23.9	12.3	61.3	2.1	0.4	4.66	153	45.9	98.6	32.8	333	46	12.9	158	0.15	9.3	16.2
656	1	54	3	2	1	3	0	0	0	7	1	4	1050	150	0	0	24.093	1	0	100	5.3	1.3	0.6	3.3	0.1	0	24.4	10.7	62.1	2.6	0.2	4.7	150	46.3	98.5	31.9	324	45.8	12.7	187	0.16	8.8	15.9
657	1	54	3	2	1	3	0	0	0	6	1	4	900	150	0	0	24.6244	1	0	100	5.6	1.3	0.6	3.4	0.2	0	23.8	11	61.8	3	0.4	4.6	151	46.3	100.6	32.9	326	46.7	12.8	143	0.13	9	16
658	1	53	3	2	1	3	0	0	0	5	1	4	750	150	0	0	24.6244	1	0	100	7.4	1.6	0.4	5.5	0	0	20.8	4.8	73.8	0.5	0.1	4.7	147	43.1	91.7	31.2	341	43.7	13.1	153	0.16	10.4	16.6	9.6	0.8	151.7	23.4	3.25	16.7
659	1	53	3	2	1	3	0	0	0	4	1	4	600	150	0	0	24.093	1	0	100	5.1	1.7	0.5	2.8	0.1	0	34.1	9.1	55	1.5	0.3	4.93	141	43.8	88.8	28.6	322	49.5	15.2	136	0.14	10.1	15.8	10.6	0.89	124.1	26.2	3.76	16.8
660	1	53	3	2	1	3	0	0	0	3	1	4	450	150	0	0	24.093	1	0	100	3.8	1.3	0.5	1.9	0.1	0	33.8	13.8	50.2	1.9	0.3	3.41	113	34.7	101.7	33	326	83.9	21.5	165	0.16	9.4	16.1	10.6	0.88	126.5	24.5	2.56	17
661	1	53	3	2	1	3	0	0	0	2	1	4	300	150	0	0	24.6244	1	0	100	3.8	1.3	0.5	1.9	0.1	0	33.8	13.8	50.2	1.9	0.3	3.41	113	34.7	101.7	33	326	83.9	21.5	165	0.16	9.4	16.1	10.6	0.88	126.5	24.5	2.56	17
662	1	53	3	2	1	3	0	0	0	1	1	4	150	150	0	0	24.6244	1	0	100	6.8	1.3	0.7	4.8	0	0	19.4	9.9	69.8	0.5	0.4	3.68	116	34.8	94.5	31.6	333	70.5	20.8	267	0.22	8.2	15.5	10.8	0.91	119.5	24.7	2.8	17.3
663	1	36	3	2	2	3	1	0	0	10	0	3	1600	160	0	0	28.4005	1	0	100	9.1	2	0.7	6.3	0	0.1	21.8	7.9	69.5	0.3	0.5	4.02	120	36.9	91.7	29.8	325	59	18.1	324	0.27	8.3	15.6	10.9	0.91	117.2	24.7	2.7	15.7
664	1	36	3	2	2	3	1	0	0	9	0	3	1440	160	0	0	29.0688	1	0	100	6.9	1.7	0.3	4.8	0.1	0	24.6	4.8	69.8	0.7	0.1	4.79	148	43.6	91	30.9	339	42.9	13	188	0.18	9.7	16.3	10.2	0.85	134.1	24.4	3.32	16.9
665	1	36	3	2	2	3	1	0	0	8	0	3	1280	160	0	0	29.0688	1	0	100	4.3	1.7	0.4	2.1	0.1	0	40	8.9	49	1.4	0.7	4.52	140	41.6	92	30.9	337	44.2	13.2	173	0.18	10.1	16.6	10	0.83	139.6	25.1	2.25	17.2
666	1	36	3	2	2	3	1	0	0	7	0	3	1120	160	0	0	29.0688	1	0	100	9.3	2.6	0.6	5.7	0.3	0	28.1	6.9	61.3	3.5	0.2	4.57	131	41.1	90	28.8	319	39.6	12.1	235	0.2	8.5	15.9	10.4	0.87	128.9	25.9	3.01	14.3
667	1	36	3	2	2	3	1	0	0	6	0	3	960	160	0	0	28.4005	1	0	100	4.3	1.7	0.4	2.2	0	0	38.7	9.4	50.7	0.8	0.4	4.61	139	41.1	89.1	30.1	338	47.6	14.7	182	0.17	10	16.4	11	0.92	117.2	26.5	2.79	15.6
668	1	36	3	2	2	3	1	0	0	5	0	3	800	160	0	0	28.4005	1	0	100	6.2	1.9	0.4	3.8	0.1	0	30.3	6.8	61.8	0.9	0.2	4.68	139	41	87.6	29.7	339	49	15.5	157	0.16	10.7	17	10.3	0.85	134.1	25.1	2.95	15.4
669	1	36	3	2	2	3	1	0	0	4	0	3	640	160	0	0	28.4005	1	0	100	5.9	2	0.4	3.4	0.1	0	33.4	7.3	58.1	1	0.2	4.85	142	42.2	87.1	29.4	336	49	15.6	177	0.18	10.1	16.5	10.4	0.86	131.5	25.8	2.95	15.4
670	1	36	3	2	2	3	1	0	0	3	0	3	480	160	0	0	28.4005	1	0	100	5.5	1.9	0.4	3.1	0.1	0	34.2	7.5	57.1	0.9	0.3	4.83	142	41.5	86	29.4	342	48	15.3	156	0.18	10.7	16.6	10.4	0.87	128.9	25.6	3.01	15
671	1	36	3	2	2	3	1	0	0	2	0	3	320	160	0	0	28.4005	1	0	100	5.7	1.9	0.3	3.3	0.1	0	34	6	58.4	1.5	0.1	4.68	133	40.2	85.8	28.4	331	45	14.5	205	0.18	10.2	16.2	10.8	0.91	119.5	25	3.15	15.2
672	1	36	3	2	2	3	1	0	0	1	0	3	160	160	0	0	28.4005	1	0	100	5.2	1.9	0.3	2.8	0.1	0	37.6	6.4	54.3	1.5	0.2	4.66	133	40.3	86.4	28.6	330	44.2	14.1	206	0.23	10.4	16.1	10.5	0.96	107.9	26.4	3.44	15.1
673	1	48	4	2	4	1	0	0	0	8	1	3	1360	170	0	0	27.4587	1	0	100	3.8	1.5	0.5	1.7	0.1	0	38.9	13.3	45.5	1.9	0.4	4.04	124	37.6	93	30.7	331	58.8	17.8	249	0.19	7.6	15.4	10.4	0.87	128.9	24.2	2.52	15.9
674	1	58	3	1	0	3				5	1	3	1000	200	0	0	23.1206	1	1	100	3.5	1.1	0.6	1.7	0.2	0	31.7	15.9	47.6	4.3	0.5	4.45	130	38.8	87.3	29.1	335	38.8	12.3	181	0.17	9.3	16.1	11.4	0.95	109	29.5	2.95	16.5
675	1	58	3	1	0	3				4	1	3	800	200	0	0	21.4692	1	1	100	3.1	1.3	0.4	1.3	0.1	0	41	12.1	41.9	4.3	0.7	4.33	134	40.6	93.8	31	330	66.8	19.8	110	0.11	10.3	16	10.5	0.88	126.5	24.3	202	17.5
676	1	58	3	1	0	3				3	1	3	600	200	0	0	21.4692	1	1	100	8.6	1.7	0.7	6	0.2	0	19.6	8	69.7	2.5	0.2	4.37	137	41.1	94.1	31.4	333	65.7	19.4	117	0.12	10.5	16.2	10.5	0.88	126.5	24.3	2.2	17.5
677	1	58	3	1	0	3				2	1	3	400	200	0	0	20.148	1	1	100	4.5	1.3	0.5	2.5	0.2	0	29.5	10.1	55.8	4.2	0.4	4.72	138	42.4	89.9	29.3	325	61.4	19.1	135	0.15	10.9	16.2	10.2	0.85	134.1	24.9	2.4	17
678	1	58	3	1	0	3				1	1	3	200	200	0	0	21.7994	1	1	100	3.6	1.1	0.6	1.7	0.1	0	31.6	17.3	47.1	3.6	0.4	4.58	133	40.1	87.6	29	332	59.3	18.9	133	0.13	10.7	15.9	10.6	0.89	124.1	25.6	2.61	15
679	1	60	4	2	1	2	1	0	0	1	0	4	180	180	0	0	22.46	1	1	100	3.5	0.8	0.3	2.4	0.1	0	21.8	7.3	68.1	2.1	0.7	3.96	124	38.2	96.4	31.4	325	56.8	16	161	0.16	10.1	16.1	10.1	0.84	136.8	24.5	2.52	17.1
680	1	57	4	0	0	2				4	1	3	720	180	0	0	28.075	1	0	100	0.9	0.6	0.4	1.8	0.1	0	19.6	12.7	64.1	2.8	0.8	3.71	117	35.7	96.1	31.6	328	61.4	17.7	139	0.13	9.2	15.9
681	1	57	4	0	0	2				3	1	3	540	180	0	0	28.075	1	0	100	3.5	0.7	0.3	2.5	0.1	0	18.7	8.1	70.7	1.7	0.8	3.92	122	36.6	93.4	31.3	333	48.5	14.5	158	0.14	9.1	15.8
682	1	57	4	0	0	2				2	1	3	360	180	0	0	28.075	1	0	100	3	1.1	0.5	1.2	0.1	0.1	38	17.5	38.9	4	1.6	4.29	120	37.1	86.5	27.8	323	47.7	15.2	193	0.18	9.1	15.8	10.7	0.9	121.7	25.7	2.74	17.4
683	1	57	4	0	0	2				1	1	3	180	180	0	0	28.075	1	0	100	5.4	1.8	0.7	2.4	0.4	0	34	13.6	44.9	7.1	0.4	4.58	143	45.2	98.7	31.3	316	73.1	19.4	129	0.12	9.4	16.6	10.9	0.91	119.4	23.7	2.13	17.6
684	2	71	4	1	1					3	0	3	600	200	0	0	20.9572	2	0	100	5.8	1.5	1	3	0.3	0	25.7	17.1	51.1	5.4	0.7	4.49	137	42.4	94.4	30.6	323	60.9	18.2	159	0.14	8.8	16.2	10.8	0.91	119.5	24.5	2.22	18.4
685	2	71	4	1	1					2	0	3	400	200	0	0	20.9572	2	0	100	5.8	1.5	1	3	0.3	0	25.7	17.1	51.1	5.4	0.7	4.49	137	42.4	94.4	30.6	323	60.9	18.2	159	0.14	8.8	16.2	10.8	0.91	119.5	24.5	2.22	18.4
686	2	71	4	1	2					1	0	3	200	200	0	0	20.9572	2	0	100	4.2	0.9	0.6	2.6	0.1	0	20.2	14.2	63	2.1	0.5	4.19	131	40.3	96.3	31.4	325	46	13.2	134	0.12	8.8	16.3
687	1	79				3	1	0	0	1	1	4	120	120	0	0	21.7738	2	1	100	5.7	2	0.4	3	0.2	0.1	35.8	6.9	52.3	4	1	3.75	110	34.6	92.3	29.3	318	45.5	13.5	136	0.18	13.1	16.4	10.9	0.91	117.2	24.1	3.44	15.5
688	1	57					0	0	0	2	0	4	400	200	0	0	24.4898	1	1	100	3.8	1.2	0.2	2.2	0.1	0	32.3	6.5	58.6	2.2	0.4	3.64	104	31.4	86.3	28.6	331	51.5	16.2	187	0.16	8.7	15.7	11.5	0.97	105.2	26.7	2.46	16.1
689	1	57					0	0	0	1	0	4	200	200	0	0	24.4898	1	1	100	5.6	1.6	0.6	3.3	0.2	0	28.6	9.8	58.7	2.6	0.3	4.15	139	41	98.9	33.4	339	46.8	12.9	215	0.22	10.3	16.2	10.1	0.84	136.8	28.2	2.64	17
690	1	54	3	2	1	3	0	0	0	9	1	4	1350	150	0	0	24.2701	1	0	100	5.9	1.6	0.3	3.8	0.1	0	27.6	5.8	65.1	1.3	0.2	4.13	131	38.9	94.2	31.9	337	42.8	12.4	125	0.15	11.7	16.6	11.4	0.96	107.1	26.6	2.37	16.4
691	2	56	3	2	0	2	0	0	0	1	0	3	200	200	0	0	26.0375	1	0	100	6.3	1.8	0.8	3.5	0.2	0	29.1	12.6	54.8	3	0.5	4.02	130	38.8	96.4	32.3	335	63.6	18.3	119	0.15	12.5	16.8	11.2	0.94	111	23.6	2.9	16.9
692	1	78	3	2	0	3				6	0	3	960	160	0	0	28.4005	1	0	100	3.7	2	0.3	1.3	0.1	0	54	9.2	34.7	1.8	0.3	4.56	129	40.7	89.3	28.3	317	52.9	16.4	191	0.2	10.4	16	12.5	1.06	90.3	29	1.65	17.5
693	1	60	4	2	1	1	0	0	0	4	1	4	500	125	0	0	27.5482	1	0	100	3.9	1.1	0.3	2	0.4	0	28.9	7.5	52	10.7	0.9	3.58	101	31.3	87.3	28.3	323	42.9	13.7	142	0.12	8.6	15.8	10.9	0.91	117.2	24.8	2.54	16.7
694	1	60	4	2	1	1	0	0	0	3	1	4	375	125	0	0	27.9431	1	0	100	4.9	1.7	0.5	2.4	0.2	0	34.8	10.8	49.3	4.6	0.5	3.9	130	39.2	100.6	33.3	332	48.4	13.2	233	0.23	9.7	15.8	10.4	0.87	128.9	26.2	3.07	15.7
695	1	60	4	2	1	1	0	0	0	2	1	4	250	125	0	0	25.4028	1	0	100	4.9	1.8	0.6	2.4	0.1	0	36.2	12.4	48.8	2.1	0.5	3.7	123	36.7	99.3	33.3	335	45.7	12.7	332	0.26	9.1	16	10.5	0.88	126.5	26.7	3.25	15.2
696	1	60	4	2	1	1	0	0	0	1	1	4	125	125	0	0	25.4028	1	0	100	5.1	1.4	0.6	2.9	0.2	0	28.2	11.5	56.4	3.4	0.5	3.79	128	38.4	101.2	33.9	333	48.2	13.1	283	0.25	9.3	15.8	10.7	0.9	121.7	26.2	3.67	14.6
697	1	60	4	2	1	4	0	0	0	4	0	4	480	120	0	0	18.9164	1	1	100	3.9	1.1	0.3	2	0.4	0	28.9	7.5	52	10.7	0.9	3.58	101	31.3	87.3	28.3	323	42.9	13.7	142	0.12	8.6	15.8	10.9	0.91	117.2	24.8	2.54	16.7
698	1	66	3	0	0	3	0	0	0	5	0	2	1000	200	0	0	25.2595	1	0	100	3.2	1	0.4	1.6	0.1	0	32.6	12.7	48.8	4.5	1.4	4.36	132	39.5	90.6	30.3	334	37.6	11.4	319	0.27	8.3	15.7	10.9	0.91	117.2	24.3	4.57	15.2
699	1	66	3	0	0	3	0	0	0	4	0	2	800	200	0	0	24.9135	1	0	100	6.5	2.2	0.7	3.4	0.2	0	33.2	11.2	52.4	2.7	0.5	3.84	120	36.2	94.3	31.2	331	59.2	17.4	103	0.14	13.5	16.9	10.7	0.9	121.7	24.1	2.52	17.3
700	1	66	3	0	0	3	0	0	0	3	0	2	600	200	0	0	24.9135	1	0	100	6.8	2.3	0.6	3.6	0.2	0	34.4	9.1	52.8	3.3	0.4	3.79	114	35.2	92.9	30	324	62.4	18.4	160	0.2	12.5	16.2	10.9	0.91	117.2	23.3	3.39	14.8
701	1	66	3	0	0	3	0	0	0	2	0	2	400	200	0	0	24.9135	1	0	100	6.9	2.1	0.6	4	0.2	0	31	8.6	57.9	2.3	0.2	4.21	122	37.6	89.3	29	324	68.2	21.1	133	0.15	12.3	15.9	10.4	0.87	128.9	24.2	2.48	15.8
702	1	66	3	0	0	3	0	0	0	1	0	2	200	200	0	0	24.9135	1	0	100	7.2	2.3	0.7	3.9	0.3	0	31.6	9.7	54.5	3.7	0.5	3.95	107	33.1	83.9	27.1	323	51.3	17	120	0.16	13.1	16.5	11.1	0.93	113	23.9	2.48	15.2
703	1	19	3	1	0	1				1	0	3	100	100	0	0	16.9753	1	1	100	2	1	0.5	0.4	0.1	0	50.1	22.7	19.8	5.9	1.5	4.04	117	35.6	88.1	28.9	329	52.7	16.4	130	0.12	9	15.9	11.2	0.94	111	27.1	2.68	18.2
704	1	77	3	2	0	3				1	0	3	200	200	0	0	24.3025	2	0	100	5.1	1.4	0.4	3.1	0.2	0	26.5	7.3	61	4.7	0.5	3.96	123	36.5	92.1	31	337	45.2	13.9	143	0.15	10.4	16.2
705	1	66	4	2	0	2	0	0	0	4	0	2	520	130	0	0	24.3046	1	1	100	11.5	1	0.8	9.5	0.2	0	8.7	6.8	82.4	1.9	0.2	3.86	105	32.4	83.9	27.2	324	52.4	17.2	147	0.13	9.1	15.7	11.5	0.97	105.2	24.2	2.25	16.4
706	1	69	5	5	1					1	0	4	160	160	0	0	22.0386	1	0	100	4.7	1.5	0.4	2.8	0.1	0	30.7	8.4	59.4	1	0.5	3.74	114	34	90.8	30.3	335	44.5	13.6	205	0.2	9.8	15.7	11.1	0.93	113	23.9	2.37	17.4
707	2	63	3	0	0	3	0	0	0	4	1	2	480	120	0	0	22.806	1	1	100	4	1.3	0.3	2.4	0.1	0	33.2	6.7	58.5	1.2	0.4	3.8	123	36.8	96.9	32.5	334	45.3	12.7	223	0.19	8.3	15.5	11	0.92	117.2	28.7	2.81	16.1
708	1	58	3	1	0	3				6	1	3	1200	200	0	0	23.1206	1	1	100	3.1	1.1	0.4	1.5	0	0	36.3	14.1	48.2	1.3	0.1	3.46	118	34.6	99.9	34	341	69.2	19.7	219	0.18	8.1	16.6	10.5	0.87	128.9	26.5	3.19	16.5
709	1	54	3	2	1	3	0	0	0	10	1	4	1500	150	0	0	24.093	1	0	100	3.9	0.7	0.5	2.6	0.1	0	18.7	13.4	66.1	1.5	0.3	4.27	138	41.8	98	32.4	330	48.3	13.6	151	0.13	8.5	16
710	1	58	3	1	0	3				1	0	3	190	190	0	0	19.0311	1	0	100	3.1	1.5	0.3	1.3	0	0	48.3	9.7	10.6	1.1	0.3	3.95	107	33.1	83.8	27.1	323	52.7	17.7	205	0.19	9.3	16.3	11.7	0.98	103.4	25.8	1.63	17.8
711	1	79				3	1	0	0	2	1	4	240	120	0	0	21.048	2	1	100	2	1	0.5	0.4	0.1	0	50.1	22.7	19.8	5.9	1.5	4.04	117	35.6	88.1	28.9	329	52.7	16.4	130	0.12	9	15.9	11.2	0.94	111	27.1	2.68	18.2
712	1	74	2	1	0		1	0	0	1	1	3	200	200	0	0	24.9135	2	1	100	5.1	1.4	0.4	3.1	0.2	0	26.5	7.3	61	4.7	0.5	3.96	123	36.5	92.1	31	337	45.2	13.9	143	0.15	10.4	16.2
713	1	47				2	1	1	1	1	0	4	140	140	0	0	22.4913	1	0	100	3.2	1	0.4	1.6	0.1	0	32.6	12.7	48.8	4.5	1.4	4.36	132	39.5	90.6	30.3	334	37.6	11.4	319	0.27	8.3	15.7	10.9	0.91	117.2	24.3	4.57	15.2
714	1	48				2	1	1	1	2	0	4	280	140	0	0	22.4913	1	0	100	3.7	1.1	0.4	2.2	0.1	0	28.5	9.6	58.5	2.8	0.6	4.53	139	41.4	91.3	30.6	336	40	12.1	205	0.19	9.2	15.9	10.6	0.89	121.4	24.1	4.43	16
715	1	57	2	0	0					2	1	1	400	200	1	0	25.5102	1	0	100	3.8	1.5	0.3	1.9	0.1	0	40.7	6.5	51	1.3	0.5	4.04	131	40	98.9	32.5	329	62.2	17.3	112	0.13	11.6	16.8	10.6	0.92	109.1	26	3.12	16.6
716	1	27	2	0	0					1	1	1	200	200	1	0	25.5102	1	0	100	3.2	1.2	0.2	1.8	0	0	36.2	6.5	55.5	1.4	0.4	3.94	124	37.5	95.2	31.5	331	53.8	15.6	122	0.13	11.1	16.3	10.5	0.91	110.2	25.2	3.75	16.3
717	1	51	4	1	0					2	1	3	280	140	0	0	27.4506	1	0	100	9.8	1.9	0.6	7.2	0.3	0	18.8	5.6	72.9	2.5	0.2	4.84	141	41.7	86.1	29.1	338	52.2	16.6	113	0.12	10.5	16.2	11.7	1.02	96.9	27.5	3.17	14.1
718	1	51	4	1	0					1	1	3	140	140	0	0	27.4506	1	0	100	9.1	2.2	0.5	6.1	0.3	0	24.2	67	5.6	3	0.2	4.82	139	40.4	83.8	28.8	344	47.2	15.4	117	0.13	10.7	16.1	11.5	1	100	27.9	2.91	19.3
719	1	66	4	2	0	2	0	0	0	5	0	2	650	130	0	0	24.3046	1	1	100	2.1	0.9	0.3	0.8	0.1	0	44.1	12.1	38.5	3.6	1.7	4.1	112	34.9	85.2	27.3	321	53.9	17.4	148	0.14	9.3	15.9	11.7	0.99	100.3	23.9	2.55	17
720	1	62	3	0	0	3				1	0	2	200	200	0	0	24.5675	1	0	100	4.6	1.5	0.5	2.5	0.2	0	32.6	10	53.1	3.8	0.5	4.78	139	41.8	87.5	29.2	333	46.1	14.7	90	0.11	12.3	17	10.7	0.89	121.4	25.5	1.57	16.6
721	1	57					0	0	0	3	0	4	600	200	0	0	24.4898	1	1	100	4.6	1.8	0.6	2	0.2	0	39.4	12.3	43.1	4.5	0.7	4.4	140	42	95.4	31.8	333	62.7	17.9	113	0.1	8.8	16	10.5	0.88	123.7	26.2	2.01	18.3
722	2	73	3	2	0	3				1	1	3	100	100	0	0	30.0781	2	1	100	2.8	1.4	0.2	1.2	0.1	0	49.4	5.7	42	2.5	0.4	3.88	113	33.8	87.2	29.1	334	45.8	14.9	148	0.12	8	15.5
723	1	19	3	1	0	1				2	0	3	200	100	0	0	16.9753	1	1	100	4	2.1	0.4	1.4	0.1	0	52.8	9.4	35.2	2.1	0.5	4.56	135	42.1	92.3	29.6	321	56.7	17.1	197	0.19	9.5	15.8	12.6	1.07	86.9	31.1	1.41	18.2
724	1	54	3	2	1	3	0	0	0	10	1	4	1500	150	0	0	24.2701	1	0	100	4.4	0.8	0.5	3	0.1	0	17.2	12.1	68.5	2	0.2	4.19	133	40.9	97.5	31.7	325	49.4	13.8	160	0.14	8.8	16.5	11	0.92	115	25.5	4.32	16.5
725	1	67	3	2	0					1	0	3	190	190	0	0	17.5415	1	1	100	4.6	0.8	0.5	3.1	0.2	0	16.9	10	68.2	4.6	0.3	4.78	144	44	92.1	30.1	327	47.6	14.5	157	0.15	9.3	16	11.9	1.01	98.1	26	3.19	15.4
726	1	43	3	0	1	3				5	1	4	750	150	0	0	19.5682	1	0	100	5.3	0.6	0.3	4.3	0.1	0	11.3	5.4	80.6	2.5	0.2	3.9	121	37.4	96	31.1	324	56	15.8	295	0.29	9.7	16.2	12.6	1.07	88.2	27.2	6.17	15.1
727	1	43	3	0	1	3				4	1	4	600	150	0	0	21.1463	1	0	100	5.6	0.8	0.3	4.4	0.1	0	13.4	6	78.8	1.4	0.4	4.38	138	42	96	31.6	329	51.6	14.7	285	0.29	10.2	16.6	12.1	1.03	94.9	27.7	5.28	16.2
728	1	43	3	0	1	3				3	1	4	450	150	0	0	21.1463	1	0	100	5.1	0.4	0.3	4.3	0.1	0	8.4	6	84	1.4	0.2	4.13	132	40.3	97.5	32.1	328	56	15.8	203	0.21	10.3	16.6	12.1	1.02	94.9	28.6	3.85	14.8
729	1	43	3	0	1	3				2	1	4	300	150	0	0	21.1463	1	0	100	4.4	0.7	0.3	3.4	0.1	0	14.8	6.2	76.7	2	0.3	4.11	128	39.4	95.8	31.1	325	52.6	15.2	216	0.23	10.4	16.9	11.9	1	99.8	27.4	3.01	15.7
730	1	43	3	0	1	3				1	1	4	150	150	0	0	21.1463	1	0	100	3.9	0.6	0.4	2.7	0.1	0	16.2	10	69.8	3.7	0.3	4.03	126	38.4	95.2	31.2	328	51.4	14.9	173	0.17	9.9	16.2	11.6	1.08	85.9	25.3	2.91	14.5
731	1	53	4	1	1	3	1	0	1	1	0	4	180	180	0	0	19.9432	1	1	85	3.6	1.3	0.3	1.9	0.1	0	35.4	8.6	51.8	3.7	0.5	2.89	76	23.4	81.1	26.4	325	39	13.4	179	0.19	10.4	16.5	11.7	0.98	102	19.1	2.46	15.1
732	1	77	3	2	0	3				2	0	3	400	200	0	0	24.3025	2	0	100	3.4	1.4	0.4	1.4	0.2	0	42.2	11	41.7	4.3	0.8	3.44	100	31.2	90.7	29	321	56.1	17.5	165	0.15	9.1	16	10.7	0.89	121.4	23.5	2.22	17
733	1	47	2	2	0	2	0	0	0	6	1	3	840	140	0	0	20.7612	1	1	100	4.5	1	0.3	3	0.1	0	23.2	7.2	67.6	1.5	0.5	4.16	115	35.1	84.4	27.6	328	57.8	18.8	133	0.13	9.8	15.8	10.2	0.84	136.8	24.8	2.75	16.5
734	1	47	2	2	0	2	0	0	0	5	1	3	700	140	0	0	20.7612	1	1	100	3.7	1	0.3	2.4	0.1	0	26	7.3	64	2.1	0.6	4.26	111	35.1	82.4	26.1	316	59.7	19.9	145	0.14	9.7	16.1	10.1	0.83	139.6	23.9	3.54	15.9
735	1	47	2	2	0	2	0	0	0	4	1	3	560	140	0	0	20.7612	1	1	100	3.8	1.1	0.3	2.3	0.1	0	28.8	7	62	1.8	0.4	4.36	114	35.2	80.7	26.2	324	57.7	19.7	141	0.14	9.9	16.1	10	0.83	139.6	23.8	2.84	15.6
736	1	47	2	2	0	2	0	0	0	3	1	3	420	140	0	0	20.7612	1	1	100	3.7	1.1	0.3	2.2	0.1	0	30.1	7.1	60.6	1.8	0.4	4.18	107	33.3	79.6	25.5	321	53.5	18.6	177	0.17	9.5	16	10.3	0.86	131.5	25.2	3.36	15.5
737	1	47	2	2	0	2	0	0	0	2	1	3	280	140	0	0	20.7612	1	1	100	4	1.2	0.2	2.5	0.1	0	30.2	5.1	63.1	1.2	0.4	4.19	106	32.8	78.2	25.4	323	47.9	17.1	177	0.16	10	16	11	0.92	117.2	23.9	2.79	14.2
738	1	47	2	2	0	2	0	0	0	1	1	3	140	140	0	0	20.7612	1	1	100	3.1	1.2	0.4	1.5	0.1	0	37.7	11.3	48.4	2.1	0.5	4.25	103	33.1	77.9	24.1	311	44.6	15.8	216	0.2	10.7	16.1	10.7	0.9	121.7	25.7	2.48	14.6
739	1	60	4	2	1	4	0	0	0	3	0	4	360	120	0	0	21.0938	1	1	100	6.1	1.2	0.3	4.5	0	0	19.8	4.6	74.8	0.6	0.2	4.58	145	43.2	94.4	31.7	336	45.4	13.2	144	0.17	11.7	16.3	10.6	0.89	124.1	27.1	2.4	16.8
740	1	60	4	2	1	4	0	0	0	2	0	4	240	120	0	0	20.7031	1	1	100	5.7	1.2	0.6	3.9	0.1	0	20.2	10.5	67.7	1.3	0.3	4.03	127	38.8	96.3	31.5	328	50.9	14.5	140	0.17	11.3	16.5	12.7	1	100	37.8	2.5	17.2
741	1	60	4	2	1	4	0	0	0	1	0	4	120	120	0	0	19.052	1	1	100	3.5	1.4	0.3	1.7	0.1	0	39.1	9.9	48.7	1.8	0.5	3.94	120	36.4	92.4	30.4	330	43.2	12.9	209	0.21	10.7	16.3	11.5	0.96	107.1	27.7	2.08	14.7
742	1	48				2	1	1	1	3	0	4	420	140	0	0	22.4913	1	0	100	4.2	1.1	0.4	2.7	0.1	0	25.5	9	62.7	2.5	0.3	4.54	141	41.6	91.7	31.1	339	40.8	12.3	197	0.19	9.5	16.2	10.2	0.85	130.8	23.9	4.43	16.6
743	1	60	4	2	1	4	0	0	0	5	0	4	600	120	0	0	18.9164	1	1	100	5.7	1.4	0.4	3.8	0	0	24.1	7.6	67.2	0.7	0.4	4.34	136	40.6	93.6	31.4	335	42.6	12.6	145	0.17	11.5	16.8	11.1	0.93	113	27.2	2.59	16
744	1	58				1				1	0	4	200	200	0	0	23.6614	1	0	100	4.2	0.7	0.4	3	0.1	0	16.1	9.1	71.2	3.4	0.2	4.41	142	41.6	94.4	32.1	341	48.6	14.3	167	0.17	9.9	16.3	10.8	0.9	119.5	27.1	2.33	16.2
745	1	57	4	0	0	2				5	1	3	900	180	0	0	28.075	1	0	100	2.8	0.9	0.3	1.5	0.1	0	31.1	10.9	54	3.8	0.2	4.41	133	41.1	93.1	30.1	324	62.5	18.4	103	0.11	10.8	16.2	10.4	0.87	128.9	25.1	2.33	17.5
746	1	79				3	1	0	0	3	1	4	360	120	0	0	21.7738	2	1	100	3.1	0.9	0.3	1.7	0.2	0	27.6	10.9	55.2	5.5	0.8	3.95	116	35.3	89.4	29.3	329	52.1	16.1	150	0.13	8.6	15.8	11.1	0.94	111	25.9	3.58	15.7
747	1	66	4	2	0	2	0	0	0	6	0	2	780	130	0	0	24.3046	1	1	100	1.4	0.6	0.3	0.3	0.1	0	47.4	25	19.7	6.6	1.3	3.85	108	33	85.6	27.9	327	51.6	16.7	168	0.16	9.3	16.2	11.4	0.96	107.1	23.2	2.12	16.3
748	1	72								1	1	4	150	150	0	0	22.3875	2	0	100	6.5	1.3	0.3	4.8	0.1	0	20.1	4.7	74	1.1	0.1	3.54	85	27.5	77.7	24	309	85.3	30.4	181	0.16	8.9	15.1
749	1	78	5	5	1	3				1	1	4	120	120	0	0	22.4996	2	0	95	3.3	1.2	0.4	1.6	0.1	0	36.7	11.3	49	2.5	0.5	4.28	125	37.2	86.8	29.1	336	41.6	13.2	95	0.07	7.7	15.7	14.1	1.21	70.7	30	2.89	15.9
750	1	74	2	1	0		1	0	0	2	1	3	400	200	0	0	23.939	2	1	100	6.3	1.4	0.5	4	0.3	0	22.9	8.5	63.7	4.7	0.2	4.29	135	39.9	93.1	31.4	338	56.2	17.1	185	0.18	9.6	16.1
751	2	37	5	5	1					1	0	4	100	100	0	0	15.5556	4	1	100	2.4	0.8	0.3	1.3	0	0	31.8	10.8	55.4	1.4	0.6	3.49	91	29.4	84.3	26.2	310	59.3	19.4	223	0.2	8.8	15.8	11.1	0.94	111	28.1	3.97	14.2
752	1	77	3	2	0	3				3	0	3	600	200	0	0	24.3025	2	0	100	4	2.1	1.3	0.4	0.2	0	52.7	31.85	11	4.3	0.2	3.52	105	32.2	91.4	29.6	326	61.8	17.7	28	0.03	9.9	17	11.6	0.98	103.3	26.2	3.26	16.7
753	1	48				2	1	1	1	4	0	4	560	140	0	0	22.4913	1	0	100	4.6	1.1	0.1	3.4	0	0	24	2	73.8	0.1	0.1	4.79	150	43.8	91.4	31.2	342	41.6	12.6	145	0.14	9.7	16.3	10.9	0.91	117.2	23.5	5	15.4
754	2	73	3	2	0	3				2	1	3	200	100	0	0	29.2969	2	1	100	3.2	1.5	0.2	1.4	0.1	0	46.8	5.4	43.6	4.2	0	3.34	99	29.9	89.4	29.7	331	64.4	19.9	122	0.11	8.7	15.9
755	1	62	3	0	0	3				2	0	2	400	200	0	0	24.5675	1	0	100	3.5	1.3	0.3	1.8	0.1	0	35.7	9.4	50.7	3.1	1.1	4.74	140	41.7	88	29.6	336	48	15.2	98	0.14	13.9	16.5
756	1	60	4	2	1	2	1	0	0	1	0	4	180	180	0	0	23.0546	1	1	100	2.8	0.6	0.5	1.6	0.1	0	20	19.1	57.4	2.7	0.8	4.36	128	38.3	87.9	29.4	334	46.3	14.6	266	0.23	8.5	15.4	10.3	0.85	130.8	31.3	4.09	15.5
757	1	42	3	1	1	1	0	0	0	1	0	4	220	220	0	0	18.4965	1	1	100	4.8	1.8	0.3	2.3	0.4	0	37.1	7.1	47	8.7	0.1	4.15	126	38.7	93.2	30.3	326	48.7	14.4	171	0.17	10	16.5	10.4	0.87	126	23.4	2.38	16.5
758	2	56	3	2	0	2	0	0	0	2	0	3	400	200	0	0	27.0552	1	0	100	4.7	1.9	0.3	2.3	0.1	0	41.2	6.1	49.3	3	0.4	3.61	108	32.9	91	29.9	328	44.1	13.1	163	0.21	13	16.5	11.1	0.93	113	25.6	3.109	15.7
759	1	69					0	0	1	1	0	4	180	180	0	0	22.0386	1	0	100	6.8	1.3	0.4	4.9	0.2	0	18.9	6.5	71.6	2.6	0.4	3.89	117	34.4	88.4	30.1	340	42.5	13.4	124	0.13	10.2	16.3	11.7	0.98	102	26.2	5.4	14.3
760	1	53	4	1	1	3	1	0	1	2	0	4	360	180	0	0	19.9432	1	1	85	4	1.2	0.4	2.2	0.1	0	30.6	11	55.7	2.3	0.4	2.93	80	23.7	81	27.1	338	40.7	14.6	1776	0.78	10.4	16.7	12	1.02	95.5	21.12	2.23	15.6
761	1	64	4	1	0	4	1	0	0	2	0	3	300	150	0	0	20.0288	1	0	100	5.9	1.9	0.5	3.3	0.2	0	32.6	8.4	56.1	2.5	0.4	4.14	133	39.1	94.5	32	340	62.2	18	223	0.2	9	15.7	10.7	0.9	119.2	23.5	2.55	15.9
762	1	64	4	1	0	4	1	0	0	1	0	3	150	150	0	0	19.6283	1	0	100	6.5	2.2	0.6	3.6	0.2	0	33.8	8.8	54.9	2.4	0.1	4.2	132	38.8	92.5	31.4	339	54.7	16.3	208	0.2	9.6	15.8	10.6	0.88	123.6	23.9	2.22	16.2
763	1	68	3	2	1	3	0	0	0	1	0	4	150	150	0	0	23.3011	2	0	90	3.9	1.4	0.3	2.1	0.1	0	36.5	6.6	54.6	1.7	0.6	4.07	129	39.2	96.3	31.7	329	44.2	12.9	90	0.09	9.8	16.3	11.5	0.97	103.7	22.5	2.65	16
764	1	40	3	1	0		0	0	0	1	0	3	150	150	0	0	25.2595	1	0	100	3.9	1.4	0.3	2.1	0.1	0	36.5	6.6	54.6	17	6	407	129	39.2	96.3	317	329	44..2	12.9	90	0.09	9.8	16.3	11.5	0.97	103.7	22.5	2.65	16
765	2	68	3	0	0	3				1	1	2	140	140	0	0	20.0777	1	0	100	2.7	1.3	0.4	0.9	0.1	0	496	14.3	33.2	1.7	1.2	4.42	107	33.9	76.8	24.2	316	72.7	26.4	171	0.16	9.1	15.3	10.6	0.89	124.1	23.8	3.19	15.4
766	1	62	5	5	5	1				1	0	4	120	120	0	0	17.9592	1	1	100	4.5	1.4	0.4	2.5	0.1	0	32.2	9.1	56.6	1.8	0.3	4.2	121	37.3	88.9	28.8	324	53.3	16.4	304	0.26	8.5	15.5	10.7	0.9	119.2	23.6	4.07	14.3
767	2	81	4	0	1	5	1	0	0	1	1	4	100	100	0	0	21.7778	2	0	100	2.9	1.7	0.6	0.5	0.2	0.1	57.7	19.4	15.9	5.2	1.8	3.88	86	28.2	72.7	22.1	305	51.5	19.7	303	0.29	9.7	15.5	11.7	0.98	102	21.2	3.22	14.4
768	1	79				3	1	0	0	4	1	4	480	120	0	0	21.1927	2	1	100	9.5	1.2	0.6	7.6	0.1	0	12.8	6.3	80	0.6	0.3	3.87	115	35.2	90.9	29.7	327	64.4	16.4	108	0.1	9.6	16	11.1	0.94	111	26.1	2.6	177
769	1	78	5	5	1	3				2	1	4	240	120	0	0	22.8625	2	0	100	3.3	1.4	0.4	1.4	0.1	0	42.5	12.3	42	2.7	0.5	4.37	124	37.3	85.4	28.3	332	428	13.7	130	0.1	7.8	15.6
770	1	66	4	2	0	2	0	0	0	7	0	2	910	130	0	0	24.3046	1	1	100	7.9	1.2	1.4	5.1	0.3	0	15.6	17.1	63.7	3.2	0.4	3.69	105	32.7	88.5	28.3	321	57.1	17.7	240	0.23	9.6	16	11.1	0.94	111	24.6	2.7	15.5
771	1	60	4	2	1	2	1	0	0	2	0	4	360	180	0	0	22.7204	1	1	100	3.1	0.7	0.4	1.8	0.2	0	22.1	13.9	57.3	6.5	0.2	4.36	1234	38.2	87.5	28.4	325	48.4	15.2	212	0.19	8.8	15.7	11	0.92	115.1	27.9	3.12	14.7
772	1	57					0	0	0	4	0	4	800	200	0	0	24.3025	1	1	100	4.1	1.8	0.4	1.5	0.3	0	45.2	10	37.5	6.4	0.9	4.37	143	42.9	98.2	32.8	333	61.6	17.3	80	0.07	8.8	16	10.8	0.9	119.2	24.1	2.19	16.9
773	1	60	3	2	0					1	0	3	200	200	0	0	27.9155	1	1	100	6.7	1.9	0.5	4.2	0.2	0	27.9	7.1	62.4	2.5	0.1	4.84	147	42.9	88.6	30.4	343	39.8	12.6	181	0.19	10.5	16.1	10.5	0.88	126.5	23.4	2.46	15.8
774	1	58				1				2	0	4	400	200	0	0	23.6614	1	0	100	3.7	0.9	0.4	2.3	0.1	0	24.6	10	62.9	2.1	0.4	4.38	146	42.9	98	33.4	340	61.5	17.4	164	0.16	9.8	16.3	10.5	0.87	126	26	2.35	16.1
775	2	49	3	0	5	3				1	0	2	150	150	0	0	22.6562	1	1	100	6.3	1.6	0.1	4.3	0.1	0	25.7	5.5	67.3	1.2	0.2	4.05	125	37.2	91.9	30.9	336	46.9	14.2	227	0.22	9.6	15.8	10.5	0.88	123.7	25.8	2.92	17
776	1	40	3	1	0		0	0	0	2	0	3	300	150	0	0	24.5675	1	0	100	2.1	2.4	1	18.6	0.1	0	10.7	4.4	84.4	0.4	0.1	4.64	145	43.6	94	31.1	333	45.8	13.5	203	0.2	9.7	15.9	11.2	0.94	109.1	25.7	2.1	19.6
777	1	77	5	5	5		1	0	0	1	1	4	120	120	0	0	17.9688	2	1	100	3.5	0.2	0.3	2.8	0.1	0	5.8	9	81.6	2.9	0.7	2.16	81	23.5	109	37.3	345	79.1	20	164	0.15	90	16.2	11.9	1.01	97	24.6	2.92	15
778	1	65	3	1	1	2	1	0	0	1	1	4	120	120	0	0	18.4672	1	0	100	4.1	1.1	0.7	22	0.1	0	26.2	16.6	54	2.5	0.7	4.24	116	34.5	81.4	27.3	336	43.5	14.8	256	0.22	8.6	15.6	10.7	0.89	121.7	25.1	4.45	15.6
779	1	67	4	1	1	4				1	1	4	150	150	0	0	20.8086	1	0	100	4.6	1.3	0.4	2.9	0.1	0	28	8	61.3	2.2	0.5	3.35	92	29.5	88.2	27.5	312	76.6	25.3	131	0.12	9.1	16.1	10.1	0.84	136.8	22.1	2.94	15.2
780	1	64	3	0	0	4				2	0	2	400	200	0	0	22.5309	1	0	100	5.9	1.9	0.6	2.9	0.5	0	31.7	10	48.8	8.9	0.6	3.88	124	37.3	96.2	31.9	332	68.5	20	169	0.18	10.4	16.2	11.9	1	98.6	24.7	2.9	15.6
781	1	65	3	1	0	3	0	1	0	1	1	2	200	200	0	0	22.7204	1	0	100	4.4	1.7	0.4	2.1	0.1	0	38.8	9	49	2.6	0.6	4.37	129	39.4	90.1	29.6	327	46.9	14.5	185	0.2	10.8	16	10.9	0.92	115	24.3	2.27	15.8
782	2	54	1	1	0	4				1	0	3	180	180	0	0	21.3599	1	0	100	4.2	1.1	0.3	3.3	0.1	0	23.8	5.3	69.8	1	0.1	3.98	120	35.5	89.1	30.1	338	55.6	1777.4	186	0.23	12.2	16.9	12.4	1.06	89.6	24.5	3.26	15.1
783	2	84	3	2	0	3	0	0	0	1	0	3	100	100	0	0	22.4444	2	0	75	6.7	2	0.3	4.3	0.1	0	29.6	5.1	63.4	1.6	0.3	4.13	95	30.4	73.5	23	313	58.4	21.7	113	0.1	8.5	15.4	12	1.02	95.5	25.4	22.38	15.7
784	1	59	2	1	1	1	0	0	0	3	1	4	600	200	0	0	29.4118	1	0	90	4.3	1.6	0.6	1.9	0.2	0	36.8	14.85	43.5	4.4	0.5	4.72	139	42.1	89.1	29.5	330	45.3	13.8	201	0.19	9.6	16.2	11	0.92	115	24.5	2.05	16.5
785	1	86	3	2	5					1	0	3	100	100	0	0	23.0518	2	1	75	3.1	0.5	0.4	2.2	0	0	15.5	12.8	69.6	1.4	0.7	3.28	71	23.9	73	21.6	297	87.8	32.6	172	0.14	8.4	15.2	11.5	0.97	105.2	28.2	4.45	14.8
786	1	53	4	1	1	3	1	0	1	3	0	4	540	180	0	0	19.9432	1	1	55	4	1.2	0.4	2.3	0.1	0	29	8.8	58.9	3	0.3	3.01	82	24.7	82.1	27.2	332	58.1	20.8	219	0.23	10.4	16.6	12.2	1.04	92.5	21.2	2.3	15.7
787	1	64	4	1	0	4	1	0	0	3	0	3	450	150	0	0	20.0288	1	0	100	6	2.1	0.6	3.1	0.2	0	34.2	9.4	52.5	3.6	0.3	4.03	134	39	96.7	33.1	344	64	18.2	183	0.18	9.6	15.9	10.4	0.86	128.3	21.4	2.1	16
788	1	68	3	2	1	3	0	0	0	2	0	4	300	150	0	0	22.6627	1	0	100	4.5	1	3	3.1	0.1	0	21.6	7	68.1	2.77	0.6	3.93	126	3778	96.3	32	33	508	14.7	130	0.13	10.2	16.4	11	0.93	113	24.2	4.85	14..8
789	2	59	3	0	0	3				2	0	2	220	110	0	0	19.9792	1	1	100	8.3	1.8	0.7	5.5	0.2	0.1	21..7	9	66.5	2.2	0.6	4.57	132	40.2	87.9	29	328	45.4	14.1	146	0.15	10.5	15.7	10.8	0.9	119.2	26.1	3.22	15.5
790	2	59	3	0	0	3				1	0	2	110	110	0	0	19.9792	1	1	100	4.7	1.5	0.4	2.7	0.1	0	32.6	7.6	56.6	3	0.2	4.85	137	41.8	86.1	28.2	328	42.1	12.8	143	0.14	9.5	15.1	10.8	0.91	117.1	27.6	2.81	16.7
791	1	73	3	1	0	3				2	1	3	280	140	0	0	25.9516	2	0	100	8.1	1.4	0.7	5.4	0.5	0	17.6	8.7	66.6	6.6	0.5	3.68	102	31.9	86.6	27.6	320	49.3	15.7	193	0.19	9.7	16.2	11.1	0.93	113	21.2	3.02	15.4
792	2	73	3	2	0	3				3	1	3	300	100	0	0	29.2969	2	1	100	3.9	1.3	0.3	2.2	0.1	0	33.2	6.5	57	3.2	0.1	3.69	112	34.1	92.3	30.3	328	66.6	19.7	117	0.1	8.6	15.7
793	2	74	3	0	0	3				1	0	2	180	180	0	0	24.974	2	0	100	7.6	0.5	0.3	6.6	0.2	0	6.9	3.3	87.5	2	0.3	2.91	103	30.7	105.4	35.3	336	53	13.8	127	0.11	8.8	16.1	12.2	1.04	92.5	23.5	2.99	15.4
794	2	68	3	0	0	3				2	1	2	280	140	0	0	20.0777	1	0	100	2.7	1.4	0.4	0.9	0	0	50.1	14.6	33.2	1.4	0.7	4.39	110	34.5	78.5	25.2	319	77.3	27.6	177	0.15	8.5	15.3	10.6	0.89	121.4	21.9	2.6	15.4
795	1	65	4	1	0	3	0	0	0	1	1	3	170	170	0	0	18.8189	1	0	100	5.4	1.6	0.4	3.1	0.1	0	30.6	8.1	58.5	2.4	0.4	3.72	115	34	91.4	30.9	338	44.8	13.5	170	0.14	8.3	15.6	11	0.92	115.1	23.4	3.4	15.2
796	1	60	4	2	1	2	1	0	0	3	0	4	540	180	0	0	23.3887	1	1	100	3.7	0.6	0.6	2.4	0.1	0	16.9	15.3	64.7	2.6	0.5	4.42	130	39.6	89.7	29.3	328	51.4	15.7	219	0.2	9.1	15.5	10.2	0.85	134.1	27.1	3.72	15.3
797	1	42	3	1	1	1	0	0	0	2	0	4	440	220	0	0	17.9592	1	1	100	9	0.4	0.3	8.2	0.1	0	4.3	3.7	91.3	0.7	0	4.64	146	43.8	94.3	31.5	333	54.6	15.8	139	0.17	12	16.7	11.22	0.94	111	25.4	3.7	18.7
798	2	43	4	2	0	2				1	0	3	200	200	0	0	24.0346	1	1	100	5.1	1.5	1.4	2.9	0.3	0	28.5	8.2	56.8	6.2	0.3	4.477	95	31.2	69.8	21.3	304	49.9	20.8	347	0.35	10.2	15.6	11.2	0.94	111	22.6	2.69	14.5
799	2	71	3	1	1	3				1	0	4	150	150	0	0	22.151	2	0	100	3.2	1.1	0.3	1.8	0.1	0	33.1	9.6	55	1.9	0.4	3.92	84	27.8	70.9	21.5	302	772.9	30.5	186	0.15	8.1	15.1	11.8	0.99	100.3	26.2	2.32	15.7
800	2	57	3	0	0	3				1	0	2	180	180	0	0	19.5312	1	0	100	3.2	1.1	0.3	1.8	0.1	0	33.1	9.6	55	1.9	0.4	3.92	84	27.8	70.9	21.5	302	72.9	30.5	186	0.15	8.1	15.1	11.8	0.99	100.3	26.2	2.32	15.7
801	1	40	3	1	0		0	0	0	3	0	3	450	150	0	0	24.9135	1	0	100	13.5	1.5	0.9	11.1	0.1	0	10.7	6.6	82.3	0.4	0	4.87	154	45.6	93.77	31.6	338	48.77	14.3	189	0.18	9.7	16	11	0.92	115.1	23.5	2.46	16.4
802	1	75	3	1	5	2	1	0	0	1	0	4	170	170	0	0	26.6436	1	0	100	6.9	1.6	0.7	4.5	0.1	0	22.6	10.2	65.3	1.3	0.6	4.92	150	44.3	90.1	30.5	339	54.3	16.8	130	0.13	9.8	16.4	11.1	0.93	113	25.8	2.19	16.6
803	1	62	5	5	5	1				2	0	4	240	120	0	0	17.9592	1	1	100	10	1.4	0.7	7.8	0.1	0	13.7	7.2	78	0.7	0.4	3.85	115	35	90.9	30	329	56.5	17.1	262	0.22	8.3	15.6	11.2	0.94	109.1	24.5	3.67	14.7
804	1	70	2	1	0	3	0	0	0	1	1	3	200	200	0	0	20.3074	2	1	95	5.1	4	0.4	0.4	0.2	0	79.6	8	7.4	4.5	0.5	2.55	81	23.9	93.7	31.9	339	71.1	19.1	137	0.13	9.1	15.9	11.6	0.97	103.7	26.8	5	13.3
805	1	63					1	0	0	1	1	4	200	200	0	0	19.5682	1	0	100	7.9	1.3	0.4	6.2	0.1	0	16.1	4.7	78.4	0.6	0.2	3.37	96	29.7	88.1	28.6	323	54.4	17.3	172	0.13	7.8	15.5	11.1	0.93	113	26.7	4.32	16.3
806	1	61	3	1	0	3	0	0	0	1	1	3	140	140	0	0	23.8751	2	1	100	10.4	0.9	0.7	8.8	0	0	8.4	6.4	85	0.1	0.1	3.49	77	24.8	71	22.1	310	48.2	19	229	0.17	7.6	15.3	13.7	1.17	75.1	25.9	4.57	13.6
807	1	69	3	2	1	3	0	0	0	1	0	4	120	120	0	0	18.8268	3	1	100	2.7	1	0.5	1.2	0	0	37.3	16.8	44.5	1	0.4	3.53	110	33.5	94.9	31.1	328	44	12.8	163	0.15	9.2	15.6	10.6	0.89	121.4	24.7	2.16	16
808	1	65	3	1	1	2	1	0	0	2	1	4	240	120	0	0	18.8092	1	0	100	8.7	1.3	0.5	6.8	0.1	0	15.2	5.8	77.6	0.9	0.5	4.31	116	35.5	82.3	27	327	48	16.1	277	0.23	8.1	15.2	10.9	0.91	117.1	25.6	4.71	16.2
809	1	63								2	1	3	360	180	0	0	23.4236	1	0	100	3.1	1.1	0.4	1.6	0.1	0	34.4	11.7	51.5	1.9	0.5	3.66	105	32.6	89	28.7	322	54.2	16.8	117	0.14	12.1	16.2	11.4	0.96	105.4	24.1	2.07	16.7
810	1	60	3	2	0					2	0	3	400	200	0	0	28.6501	1	1	100	6.5	1.6	0.6	4.3	0.1	0	24.8	8.4	65.3	1.1	0.4	4.49	143	42.3	94.1	31.8	338	62	18.4	144	0.16	10.9	16.7	10.1	0.84	136.8	22.3	2.12	16.1
811	2	49	3	0	5	3				2	0	2	300	150	0	0	22.6562	1	1	100	6.5	2.4	0.3	3.7	0.1	0	36.7	4.9	56.8	1.3	0.3	4.05	127	38	93.8	31.4	334	56	16.6	214	0.2	9.6	15.9	10	0.83	138.5	23.9	2.39	17.2
812	1	63								1	1	3	180	180	0	0	24.9108	1	0	100	2.8	1.2	0.3	1.3	0.1	0	40.9	12	44.1	2.4	0.6	3.46	99	30.2	87.2	28.7	328	39.5	12.5	116	0.13	11.1	16.4	11.7	0.99	101.6	21.6	1.88	16.9
813	1	67	4	1	1	4				2	1	4	300	150	0	0	20.3131	1	0	100
814	2	64	4	2	1	3	1	0	0	3	1	4	510	170	1	0	23.74	1	0	100	4.1	0.9	0.4	2.8	0	0	21.5	10.8	67.1	0.4	0.2	3.98	136	39.1	98.2	34.1	348	69.1	19.3	124	0.12	9.7	16	10.3	0.89	112.5	20.8	3.37	15.8
815	2	64	4	2	1	3	1	0	0	2	1	4	340	170	1	0	23.74	1	0	100	4.3	3	1	0.4	0	0	68.9	22.1	8.1	0.6	0.3	3.87	127	36.5	94.3	32.8	348	67.4	19.4	132	0.12	8.9	16	10.8	0.94	107	22.8	3.37	19
816	2	64	4	2	1	3	1	0	0	1	1	4	170	170	1	0	23.2834	1	0	100	6	0.9	0.5	4.6	0	0	15.2	7.5	76.5	0.5	0.3	4.33	136	40.1	92.6	31.4	340	59.2	17.6	232	0.24	10.2	16.5	9.8	0.85	118.7	23.6	4.43	16.9
817	1	55	4	0	0	3	0	0	0	3	0	2	600	200	0	0	26.9896	1	0	100	4.1	1.5	0.4	2	0.1	0	38	10.7	48.6	1.7	1	3.96	105	33.6	85	26.7	314	80.7	25.9	216	0.24	9.4	16	10.5	0.91	110.2	24.7	1.92	18.4
818	1	55	4	0	0	3	0	0	0	2	0	2	400	200	0	0	26.9896	1	0	100	4.2	1.3	0.4	2.4	0.1	0	30.9	9.8	57.4	1.2	0.7	4.05	106	32.7	80.7	26.1	323	56.5	19.4	197	0.19	9.5	15.5	10.9	0.95	105.9	24.4	1.85	18.6
819	1	55	4	0	0	3	0	0	0	1	0	2	200	200	0	0	26.9896	1	0	100	4	1.4	0.5	2	0.1	0	35	13.3	49.4	1.6	0.7	3.99	108	33.3	83.5	27	323	48.2	15.8	277	0.21	8.2	15.5	10.7	0.93	108	25	1.95	18.8
820	1	70	4	1	0	2				1	1	3	180	180	0	0	24.6548	2	0	100	3.9	1.5	0.3	2	0.1	0	38.6	8.3	50.8	1.6	0.7	4.61	147	44.5	96.6	32	331	49.8	14.2	115	0.12	10.9	16.4	11.5	1	100	28.5	3.85	15.4
821	2	40	4	0	0	2	0	0	0	4	0	2	800	200	0	0	31.051	1	0	100	3.2	1.2	0.2	1.7	0.1	0	37.7	7	52.7	2.2	0.4	3.59	101	31.4	87.6	28	320	60.2	19	143	0.18	12	16.3	10.5	0.91	110.2	24.2	2.84	15.8
822	2	40	4	0	0	2	0	0	0	3	0	2	600	200	0	0	31.051	1	0	100	3.8	1	0.3	2.4	0.1	0	27	7.5	63.6	1.4	0.5	3.92	111	34	86.7	28.2	326	64.4	20.6	186	0.2	10.9	16.1	10.3	0.89	112.5	22.8	2.91	17.2
823	2	40	4	0	0	2	0	0	0	2	0	2	400	200	0	0	31.051	1	0	100	3.7	1.4	0.4	1.8	0.1	0	36.5	9.9	49.4	3.6	0.6	3.49	96	29.6	84.8	27.7	326	58.6	19.1	183	0.2	10.2	16	10.3	0.89	112.5	22.6	2.29	18
824	2	40	4	0	0	2	0	0	0	1	0	2	200	200	0	0	31.051	1	0	100	3.6	1	0.3	2.1	0.1	0	28	8.1	59.5	3.9	0.5	3.63	98	29.9	82.2	27.1	329	53.3	17.8	190	0.22	11	16	10.7	0.93	108	24.3	2.65	19.7
825	1	68	3	2	0	3	0	0	0	4	1	3	600	150	0	0	24.3375	1	0	100	6.6	1.4	0.8	4.2	0.2	0.1	20.6	11.8	64.4	2.3	0.9	4.46	123	36.6	82.1	27.7	337	47.7	15.4	167	0.15	9.2	15.8	9.9	0.86	117.4	25.1	2.99	17.2
826	1	68	3	2	0	3	0	0	0	3	1	3	450	150	0	0	24.3375	1	0	100	14.2	1.3	0.7	12	0.1	0	9.5	5	84.5	0.7	0.3	4.26	121	35.8	84.1	28.4	338	54.2	17	155	0.14	8.9	15.5	10.2	0.88	113.7	26.2	4.31	16
827	1	68	3	2	0	3	0	0	0	2	1	3	300	150	0	0	24.3375	1	0	100	3.9	0.9	0.5	2.3	0.2	0	23.1	13.5	58.8	3.9	0.7	4.36	118	35.5	81.4	27.1	333	58.5	19.1	203	0.19	9.2	15.2	10.8	0.94	107	26.8	3.24	16.4
828	1	68	3	2	0	3	0	0	0	1	1	3	150	150	0	0	24.3375	1	0	100	10.5	1.3	0.6	8.4	0.1	0	12.6	5.9	79.9	1.3	0.3	4.48	116	35	78	25.8	331	76.5	25.8	256	0.22	8.5	15	10.8	0.94	107	26	4.67	15.9
829	1	86	3	2	5					2	0	3	200	100	0	0	23.4236	2	1	75	7.8	0.6	0.5	6.6	0.1	0	8.1	6	84.7	0.9	0.3	3.44	81	27.6	80.3	23.5	293	83.4	28.2	271	0.21	7.8	15	11.3	0.95	107.3	29.6	4.56	16.5
[truncated: 55 more columns]
